# Supplementary material for: Dally is not essential for Dpp spreading or internalization but for Dpp stability by antagonizing Tkv-mediated Dpp internalization
Source: eLife. 2024 Jan 24;12:RP86663. doi: 10.7554/eLife.86663 (PMC10945656; doi:10.7554/eLife.86663)
Supplement: Supplementary file 1. [file elife-86663-supp1.xlsx]

## Sheet: Summary (P-values)
2E		2F		2G		2H		3I					3V				4G		4H		4J		4K		4O				4S				5D		5E		5H		5I		6C		6D		6E		6I		S1B
x0		x0		x0		x0		x0	yw vs dallyMH32	yw vs dallyKO	dallyMH32 vs dallyKO	yw vs dlp	x0	yw vs dallyKO	dallyKO vs dallyYFP	dallyKO vs dlp in dallyKO	x0		x0		x0		x0		x0	dallyYFP vs dallyKO	dallyYFP vs dallyΔHS	dallyKO vs dallyΔHS	x0	Control vs dallyKO	Control vs dallyΔHS	dallyKO vs dallyΔHS	x0		x0		x0		x0		x0		x0		x0		x0		x0
-108.7	0.0011435	-108.7	0.00439285	-104.2	0.599285	-104.2	0.285438	-141.7				0.451979	-108.5	0.511591	0.675828	0.710242	-131.8	0.00968288	-114	0.26579	-144.7	0.653028	-134.5	0.0481214	-130.7	0.11164			-79.9		0.35752		-93.7	0.249003	-86.3	0.00262092	-119.3	0.395014	-112.1	0.150163	-86.7	0.226539	-58	0.255874	-58	0.0422446	-64	0.72471	-104.9
-108.3	0.000792893	-108.3	0.00265789	-103.8	0.208265	-103.8	0.560276	-141.3				0.211251	-108.2	0.408989	0.334582	0.765555	-131.4	0.00839966	-113.6	0.206082	-144.3	0.98696	-134.1	0.0275509	-130.3	0.16749			-79.5		0.510037		-93.3	0.209625	-86	0.0108653	-118.9	0.351747	-111.7	0.82009	-86.4	0.26141	-57.6	0.33885	-57.6	0.0612979	-63.6	0.484999	-104.5
-108	0.0048946	-108	0.0184804	-103.4	0.311225	-103.4	0.112042	-140.9				0.00260402	-107.8	0.0364916	0.00551961	0.0555273	-131.1	0.0121978	-113.3	0.16843	-143.9	0.598286	-133.7	0.0376586	-129.9	0.0346362			-79.2		0.135198		-93	0.477807	-85.7	0.0190366	-118.6	0.161257	-111.4	0.208361	-86	0.513971	-57.2	0.55639	-57.2	0.0126506	-63.3	0.103826	-104.2
-107.6	0.00997961	-107.6	0.0529811	-103	0.583839	-103	0.214014	-140.5				0.178818	-107.4	0.020549	0.00704375	0.617012	-130.7	0.00577901	-112.9	0.132719	-143.6	0.065791	-133.3	0.0407625	-129.5	0.00895494			-78.8		0.14069		-92.7	0.321725	-85.4	0.00336623	-118.2	0.198223	-111	0.24657	-85.6	0.496493	-56.8	0.286235	-56.8	0.0848016	-62.9	0.188714	-103.8
-107.2	0.00770754	-107.2	0.0545108	-102.7	0.597275	-102.7	0.0866793	-140.2				0.455606	-107	0.0342827	0.00591536	0.238917	-130.3	0.00573022	-112.5	0.122769	-143.2	0.457788	-133	0.0549266	-129.2	0.152746			-78.4		0.134648		-92.3	0.250046	-85	0.0150349	-117.8	0.640133	-110.6	0.0171807	-85.2	0.778683	-56.4	0.520185	-56.4	0.143939	-62.5	0.704074	-103.4
-106.8	0.00648099	-106.8	0.259557	-102.3	0.0468431	-102.3	0.0616249	-139.8				0.962168	-106.6	0.23855	0.124118	0.890863	-129.9	0.00241288	-112.1	0.0691265	-142.8	0.718449	-132.6	0.0405877	-128.8	0.912844			-78		0.0336954		-92	0.22459	-84.7	0.0487825	-117.4	0.507067	-110.2	0.148507	-84.8	0.973054	-56.1	0.324074	-56.1	0.102611	-62.1	0.544677	-103
-106.4	0.00375693	-106.4	0.0819752	-101.9	0.0293812	-101.9	0.180098	-139.4				0.685316	-106.3	0.923926	0.843176	0.603257	-129.5	0.00102416	-111.7	0.00435802	-142.4	0.967317	-132.2	0.0376587	-128.4	0.704857			-77.7		0.0404089		-91.7	0.118142	-84.4	0.0118153	-117	0.522409	-109.8	0.216846	-84.5	0.812943	-55.7	0.117783	-55.7	0.0584012	-61.7	0.784414	-102.7
-106.1	0.00483174	-106.1	0.495496	-101.5	0.130281	-101.5	0.237405	-139				0.981523	-105.9	0.137765	0.0288755	0.323225	-129.2	0.000935892	-111.4	0.0141982	-142	0.512927	-131.8	0.0376519	-128	0.156719			-77.3		0.0160686		-91.3	0.218519	-84	0.0106736	-116.7	0.37614	-109.5	0.628852	-84.1	0.596934	-55.3	0.642888	-55.3	0.0227758	-61.4	0.315161	-102.3
-105.7	0.00514403	-105.7	0.0954379	-101.1	0.109394	-101.1	0.10861	-138.6				0.740952	-105.5	0.0279401	0.0211323	0.203201	-128.8	1.09821e-05	-111	0.0358764	-141.7	0.317906	-131.4	0.0538957	-127.7	0.392094			-76.9		0.0228079		-91	0.819085	-83.7	0.0146912	-116.3	0.302777	-109.1	0.229256	-83.7	0.806379	-54.9	0.085205	-54.9	0.174645	-61	0.0792581	-101.9
-105.3	0.00115057	-105.3	0.44532	-100.8	0.46857	-100.8	0.900554	-138.3				0.267868	-105.1	0.160673	0.173984	0.40655	-128.4	0.000101736	-110.6	0.0136916	-141.3	0.548267	-131.1	0.0227642	-127.3	0.469941			-76.5		0.0505688		-90.7	0.273039	-83.4	0.0200259	-115.9	0.269298	-108.7	0.14083	-83.3	0.783031	-54.5	0.044197	-54.5	0.235186	-60.6	0.25445	-101.5
-104.9	0.00179693	-104.9	0.0326372	-100.4	0.208436	-100.4	0.0232449	-137.9				0.504218	-104.8	0.47702	0.467318	0.696422	-128	5.23333e-05	-110.2	0.100907	-140.9	0.551507	-130.7	0.0109907	-126.9	0.929714			-76.1		0.044703		-90.3	0.464449	-83	0.0505438	-115.5	0.310303	-108.3	0.170659	-83	0.759969	-54.2	0.00303342	-54.2	0.284842	-60.2	0.316532	-101.1
-104.5	0.00170296	-104.5	0.0638521	-100	0.0910039	-100	0.0061321	-137.5				0.881843	-104.4	0.954448	0.692012	0.904127	-127.7	0.000446352	-109.8	0.176355	-140.5	0.38111	-130.3	0.00500259	-126.5	0.0446247			-75.8		0.215776		-90	0.533232	-82.7	0.150877	-115.2	0.718718	-108	0.160599	-82.6	0.614845	-53.8	0.0437714	-53.8	0.480706	-59.8	0.528196	-100.8
-104.2	0.000496836	-104.2	0.00153351	-99.6	0.560162	-99.6	0.0367033	-137.1				0.345975	-104	0.0837682	0.0908456	0.269966	-127.3	0.00135137	-109.5	0.164214	-140.2	0.973516	-129.9	0.0301019	-126.1	0.00666937			-75.4	0.245136	0.271568	0.656299	-89.7	0.579956	-82.4	0.104387	-114.8	0.392143	-107.6	0.314083	-82.2	0.727116	-53.4	0.0728466	-53.4	0.695334	-59.5	0.406928	-100.4
-103.8	0.000721406	-103.8	0.00232598	-99.2	0.243541	-99.2	0.0492362	-136.7				0.608963	-103.6	0.0781333	0.0494988	0.331067	-126.9	0.000479443	-109.1	0.162104	-139.8	0.908919	-129.5	0.10817	-125.8	0.0170267			-75	0.442152	0.333138	0.751902	-89.3	0.99127	-82	0.00185229	-114.4	0.42958	-107.2	0.278016	-81.8	0.481495	-53	0.0710096	-53	0.0651892	-59.1	0.161105	-100
-103.4	0.00103126	-103.4	0.0332634	-98.9	0.0499367	-98.9	0.175462	-136.4				0.56298	-103.2	0.309538	0.0556835	0.680654	-126.5	0.000105039	-108.7	0.16206	-139.4	0.493665	-129.2	0.0810414	-125.4	0.00679861			-74.6	0.301558	0.0386117	0.956631	-89	0.739228	-81.7	0.00305519	-114	0.294154	-106.8	0.575505	-81.4	0.795062	-52.7	0.129957	-52.7	0.0316557	-58.7	0.0905555	-99.6
-103	0.00102438	-103	0.00489125	-98.5	0.0380578	-98.5	0.0850572	-136				0.381393	-102.9	0.435683	0.0676971	0.301425	-126.1	1.22354e-05	-108.3	0.102555	-139	0.680639	-128.8	0.0636905	-125	0.814742			-74.2	0.796198	0.164767	0.705531	-88.7	0.819159	-81.4	0.0110946	-113.6	0.387439	-106.4	0.160176	-81.1	0.914944	-52.3	0.057921	-52.3	0.147025	-58.3	0.29934	-99.2
-102.7	0.000226139	-102.7	0.0254241	-98.1	0.0689643	-98.1	0.0364939	-135.6				0.541941	-102.5	0.0438994	0.0159151	0.130588	-125.8	0.000195149	-108	0.0972569	-138.6	0.714581	-128.4	0.100378	-124.6	0.395356			-73.9	0.661637	0.143371	0.763108	-88.3	0.340844	-81	0.0157734	-113.3	0.566717	-106.1	0.220496	-80.7	0.90058	-51.9	0.0959148	-51.9	0.172862	-58	0.902038	-98.9
-102.3	0.000331026	-102.3	0.000165594	-97.7	0.0102725	-97.7	0.040544	-135.2				0.949832	-102.1	0.0176423	0.000375601	0.000579831	-125.4	0.00109412	-107.6	0.184115	-138.3	0.54306	-128	0.088765	-124.2	0.267715			-73.5	0.387113	0.281733	0.936622	-88	0.776333	-80.7	0.00826825	-112.9	0.382314	-105.7	0.429043	-80.3	0.735774	-51.5	0.0829576	-51.5	0.193122	-57.6	0.459032	-98.5
-101.9	6.08045e-05	-101.9	0.0297092	-97.3	0.0112169	-97.3	0.26816	-134.8				0.544014	-101.7	0.680383	0.483861	0.768289	-125	0.00246062	-107.2	0.213609	-137.9	0.77737	-127.7	0.0585604	-123.9	0.114504			-73.1	0.283822	0.0589395	0.985077	-87.7	0.332694	-80.4	0.0043194	-112.5	0.0398165	-105.3	0.467199	-79.9	0.931154	-51.1	0.477397	-51.1	0.138792	-57.2	0.139339	-98.1
-101.5	0.00013617	-101.5	0.000643104	-97	0.0309681	-97	0.251002	-134.5				0.309914	-101.4	0.93947	0.379403	0.650084	-124.6	0.00397865	-106.8	0.0363272	-137.5	0.835877	-127.3	0.0269939	-123.5	0.0305111			-72.7	0.235322	0.00165393	0.845367	-87.3	0.565294	-80	0.0108899	-112.1	0.0159103	-104.9	0.109703	-79.5	0.715238	-50.8	0.660328	-50.8	0.121623	-56.8	0.134334	-97.7
-101.1	0.000162189	-101.1	0.00236869	-96.6	0.0988277	-96.6	0.259475	-134.1				0.273017	-101	0.207699	0.0442185	0.251633	-124.2	0.00799891	-106.4	0.0289412	-137.1	0.867355	-126.9	0.0493872	-123.1	0.00526041			-72.3	0.222186	4.32285e-05	0.590779	-87	0.162103	-79.7	0.0240684	-111.7	0.0589384	-104.5	0.378043	-79.2	0.365031	-50.4	0.221774	-50.4	0.359075	-56.4	0.298059	-97.3
-100.8	0.000135797	-100.8	0.0107054	-96.2	0.0721879	-96.2	0.209282	-133.7				0.423369	-100.6	0.472816	0.0205733	0.307051	-123.9	0.00449551	-106.1	0.0238338	-136.7	0.99666	-126.5	0.0446426	-122.7	0.00325029			-72	0.0156237	0.000297482	0.927453	-86.7	0.110818	-79.4	0.0342767	-111.4	0.0810708	-104.2	0.336944	-78.8	0.783418	-50	0.440409	-50	0.0527414	-56.1	0.425072	-97
-100.4	0.000194837	-100.4	0.0170486	-95.8	0.0837385	-95.8	0.639677	-133.3				0.20692	-100.2	0.12115	0.00154175	0.395283	-123.5	0.00226971	-105.7	0.00682014	-136.4	0.564068	-126.1	0.0429183	-122.3	0.0571094			-71.6	0.0108656	0.00066775	0.889467	-86.3	0.108689	-79	0.0749746	-111	0.0848263	-103.8	0.126563	-78.4	0.641366	-49.6	0.102356	-49.6	0.0496178	-55.7	0.22053	-96.6
-100	0.0003274	-100	0.0615442	-95.5	0.139028	-95.5	0.475452	-133				0.758402	-99.8	0.368379	0.183931	0.845864	-123.1	0.00132619	-105.3	0.00037942	-136	0.929985	-125.8	0.0440903	-122	0.165987	0.0768549	0.556224	-71.2	0.000780509	0.0012585	0.959372	-86	0.17575	-78.7	0.0599702	-110.6	0.012019	-103.4	0.0280946	-78	0.241265	-49.2	0.0939102	-49.2	0.0367397	-55.3	0.10524	-96.2
-99.6	1.11124e-05	-99.6	0.158335	-95.1	0.0379799	-95.1	0.856553	-132.6				0.792091	-99.5	0.451907	0.354375	0.865026	-122.7	0.00438397	-104.9	0.00268991	-135.6	0.882406	-125.4	0.0620963	-121.6	0.565313	0.00707336	0.1646	-70.8	0.0040036	0.00683684	0.589627	-85.7	0.166736	-78.4	0.0279852	-110.2	0.225829	-103	0.229746	-77.7	0.785697	-48.9	0.13311	-48.9	0.0886529	-54.9	0.0509962	-95.8
-99.2	6.93532e-06	-99.2	0.00726125	-94.7	0.0529371	-94.7	0.148416	-132.2				0.564945	-99.1	0.507088	0.263324	0.735814	-122.3	0.00396006	-104.5	0.000954416	-135.2	0.851769	-125	0.0309267	-121.2	0.319807	0.47796	0.891414	-70.5	0.0292299	0.0192738	0.999991	-85.4	0.308834	-78	0.0197276	-109.8	0.351852	-102.7	0.170998	-77.3	0.317784	-48.5	0.0525472	-48.5	0.0998884	-54.5	0.139164	-95.5
-98.9	1.31247e-07	-98.9	0.124063	-94.3	0.0252897	-94.3	0.0880655	-131.8				0.151445	-98.7	0.367204	0.22895	0.709192	-122	0.00188336	-104.2	0.000409831	-134.8	0.944287	-124.6	0.0188716	-120.8	0.354785	0.424237	0.197991	-70.1	0.0112805	0.0140476	0.649754	-85	0.625733	-77.7	0.0109173	-109.5	0.310023	-102.3	0.078026	-76.9	0.159832	-48.1	0.00385371	-48.1	0.158362	-54.2	0.148278	-95.1
-98.5	9.71283e-06	-98.5	0.0841575	-93.9	0.165529	-93.9	0.236334	-131.4				0.128524	-98.3	0.978948	0.874911	0.620275	-121.6	0.000193118	-103.8	0.00481481	-134.5	0.947037	-124.2	0.0319327	-120.5	0.412447	0.0656372	0.468727	-69.7	0.000442616	0.000874239	0.396922	-84.7	0.382021	-77.4	0.00435551	-109.1	0.245443	-101.9	0.100021	-76.5	0.279743	-47.7	0.00126278	-47.7	0.506861	-53.8	0.238098	-94.7
-98.1	8.71486e-05	-98.1	0.115427	-93.6	0.0096557	-93.6	0.00393188	-131.1				0.379557	-97.9	0.239271	0.259624	0.908662	-121.2	4.69517e-05	-103.4	0.00552996	-134.1	0.218624	-123.9	0.0220976	-120.1	0.295528	0.329087	0.737232	-69.3	0.00616532	0.0125137	0.173607	-84.4	0.248443	-77	0.0100888	-108.7	0.0783186	-101.5	0.287348	-76.1	0.143274	-47.3	0.0013499	-47.3	0.0599528	-53.4	0.577988	-94.3
-97.7	2.32705e-06	-97.7	0.0650062	-93.2	0.005245	-93.2	0.00927468	-130.7				0.145994	-97.6	0.0802276	0.0682866	0.218954	-120.8	1.59623e-05	-103	0.00416141	-133.7	0.806548	-123.5	0.017091	-119.7	0.640239	0.159785	0.26963	-68.9	0.0667817	0.113981	0.357477	-84	0.25679	-76.7	0.00404075	-108.3	0.316147	-101.1	0.223188	-75.8	0.0820214	-47	0.0113155	-47	0.0436037	-53	0.555198	-93.9
-97.3	1.26986e-07	-97.3	0.305188	-92.8	0.0171212	-92.8	0.0664225	-130.3				0.0647817	-97.2	0.0924829	0.212938	0.461355	-120.5	0.00193696	-102.7	0.00606842	-133.3	0.944858	-123.1	0.0183697	-119.3	0.293983	0.630851	0.272191	-68.6	0.0624859	0.0473143	0.746671	-83.7	0.116653	-76.4	0.0026299	-108	0.175433	-100.8	0.0130292	-75.4	0.158322	-46.6	0.016862	-46.6	0.0435038	-52.7	0.667938	-93.6
-97	8.13986e-08	-97	0.0710486	-92.4	0.0783565	-92.4	0.320241	-129.9				0.114447	-96.8	0.360111	0.06874	0.0834786	-120.1	0.00870085	-102.3	0.00636181	-133	0.365447	-122.7	0.00851757	-118.9	0.00124907	0.367839	0.148541	-68.2	0.0988819	0.0978288	0.963314	-83.4	0.271218	-76.1	0.00252622	-107.6	0.561063	-100.4	0.00886025	-75	0.263747	-46.2	0.0382234	-46.2	0.0418389	-52.3	0.418074	-93.2
-96.6	2.73336e-07	-96.6	0.0953635	-92	0.111647	-92	0.139309	-129.5				0.187458	-96.4	0.839179	0.921401	0.800637	-119.7	0.00154946	-101.9	0.00702292	-132.6	0.893695	-122.3	0.0117225	-118.6	0.356208	0.197605	0.918292	-67.8	0.0390487	0.0831697	0.981657	-83	0.130082	-75.7	0.00473244	-107.2	0.848031	-100	0.00157554	-74.6	0.977503	-45.8	0.175554	-45.8	0.0333038	-51.9	0.144623	-92.8
-96.2	2.32774e-06	-96.2	0.000738564	-91.7	0.145179	-91.7	0.0194107	-129.2				0.153868	-96.1	0.582651	0.919189	0.297438	-119.3	0.000928091	-101.5	0.00113003	-132.2	0.80445	-122	0.0118067	-118.2	0.59537	0.671037	0.42889	-67.4	0.339201	0.107316	0.683846	-82.7	0.129833	-75.4	0.0143345	-106.8	0.658012	-99.6	0.0237451	-74.2	0.718634	-45.5	0.0843346	-45.5	0.0810793	-51.5	0.407365	-92.4
-95.8	2.18371e-05	-95.8	0.0167237	-91.3	0.295511	-91.3	0.177856	-128.8				0.0132207	-95.7	0.873394	0.931979	0.189026	-118.9	0.00210303	-101.1	0.00106825	-131.8	0.780715	-121.6	0.021401	-117.8	0.631199	0.0870854	0.274874	-67	0.0939357	0.00623563	0.892013	-82.4	0.113929	-75.1	0.0640259	-106.4	0.164059	-99.2	0.0378006	-73.9	0.792637	-45.1	0.0809913	-45.1	0.22127	-51.1	0.218176	-92
-95.5	7.71977e-05	-95.5	0.0113935	-90.9	0.0513551	-90.9	0.181838	-128.4				0.0242476	-95.3	0.352659	0.145083	0.64082	-118.6	0.000676128	-100.8	0.000810069	-131.4	0.744737	-121.2	0.0342206	-117.4	0.996809	0.24995	0.285375	-66.7	0.0102702	0.0200679	0.539505	-82	0.267322	-74.7	0.0193575	-106.1	0.777536	-98.9	0.179397	-73.5	0.503631	-44.7	0.0308391	-44.7	0.381345	-50.8	0.0711579	-91.7
-95.1	0.000249965	-95.1	0.0264615	-90.5	0.0326147	-90.5	0.319016	-128				0.0243428	-94.9	0.0927315	0.0744814	0.670674	-118.2	0.000689431	-100.4	0.00115728	-131.1	0.468671	-120.8	0.0590902	-117	0.0603147	0.839639	0.0659237	-66.3	0.0095128	0.0537781	0.11935	-81.7	0.220224	-74.4	0.0151684	-105.7	0.960087	-98.5	0.0163526	-73.1	0.584276	-44.3	0.0338609	-44.3	0.274608	-50.4	0.265312	-91.3
-94.7	7.92993e-05	-94.7	0.0533857	-90.2	0.0360873	-90.2	0.264287	-127.7				0.00537077	-94.5	0.113101	0.0481633	0.853018	-117.8	0.000876336	-100	0.00236895	-130.7	0.695312	-120.5	0.0599677	-116.7	0.553929	0.216764	0.195743	-65.9	0.0105287	0.0247245	0.446329	-81.4	0.254536	-74.1	0.00221343	-105.3	0.738151	-98.1	0.0367912	-72.7	0.887934	-43.9	0.0396826	-43.9	0.279948	-50	0.446285	-90.9
-94.3	4.72747e-05	-94.3	0.0306406	-89.8	0.0698537	-89.8	0.233844	-127.3				0.0303214	-94.2	0.00350099	0.000993656	0.00632264	-117.4	0.000286191	-99.6	0.00443769	-130.3	0.406974	-120.1	0.0227637	-116.3	0.0540334	0.297934	0.0141518	-65.5	0.0132428	0.0313695	0.404809	-81	0.302176	-73.7	0.00987362	-104.9	0.600281	-97.7	0.0154338	-72.3	0.334988	-43.6	0.0670925	-43.6	0.104444	-49.6	0.257776	-90.5
-93.9	1.99565e-05	-93.9	0.0780573	-89.4	0.108923	-89.4	0.148707	-126.9				0.242523	-93.8	0.0132463	0.00204752	0.0356381	-117	0.000184105	-99.2	0.00264499	-129.9	0.0886588	-119.7	0.0322897	-115.9	0.00860788	0.715932	0.171526	-65.2	0.00903862	0.0249361	0.174151	-80.7	0.401434	-73.4	0.0057464	-104.5	0.523345	-97.3	0.0438274	-72	0.42115	-43.2	0.0202898	-43.2	0.345696	-49.2	0.903314	-90.2
-93.6	1.3301e-05	-93.6	0.227546	-89	0.0264954	-89	0.0746042	-126.5				0.101028	-93.4	0.00301792	0.0110336	0.0199587	-116.7	0.000103002	-98.9	0.00075017	-129.5	0.235641	-119.3	0.0361958	-115.5	0.0383544	0.226416	0.448681	-64.8	0.000431681	0.00202578	0.100962	-80.4	0.273765	-73.1	0.00908742	-104.2	0.650696	-97	0.0119374	-71.6	0.946507	-42.8	5.94869e-05	-42.8	0.807655	-48.9	0.909754	-89.8
-93.2	8.74529e-06	-93.2	0.167626	-88.6	0.015076	-88.6	0.169622	-126.1				0.634229	-93	0.0361678	0.0247591	0.0816615	-116.3	5.9078e-05	-98.5	0.000123438	-129.2	0.714922	-118.9	0.024486	-115.2	0.00586859	0.637568	0.137959	-64.4	0.00111275	0.00995995	0.0484931	-80	0.0997933	-72.7	0.00996609	-103.8	0.289617	-96.6	0.00391129	-71.2	0.659015	-42.4	0.00356873	-42.4	0.284468	-48.5	0.508116	-89.4
-92.8	3.62909e-06	-92.8	0.167216	-88.3	0.00961243	-88.3	0.169291	-125.8		0.390818		0.440929	-92.7	0.150537	0.0885187	0.458443	-115.9	8.85967e-05	-98.1	0.000247409	-128.8	0.236642	-118.6	0.0299748	-114.8	0.665198	0.208683	0.49317	-64	0.0821764	0.0406714	0.87302	-79.7	0.276596	-72.4	0.00346634	-103.4	0.849082	-96.2	0.0269326	-70.8	0.541053	-42	0.00481363	-42	0.381223	-48.1	0.701187	-89
-92.4	3.35512e-07	-92.4	0.0508091	-87.9	0.160242	-87.9	0.195297	-125.4		0.277384		0.474251	-92.3	0.100164	0.247069	0.230513	-115.5	0.000198775	-97.7	0.000327773	-128.4	0.866922	-118.2	0.064077	-114.4	0.0526282	0.662918	0.136069	-63.6	0.0254922	0.017297	0.760153	-79.4	0.296353	-72.1	0.00200788	-103	0.495256	-95.8	0.058344	-70.5	0.759009	-41.7	0.0133786	-41.7	0.0907703	-47.7	0.902942	-88.6
-92	1.90621e-06	-92	0.0629934	-87.5	0.0731826	-87.5	0.162888	-125		0.160597		0.261917	-91.9	0.762813	0.832407	0.878904	-115.2	0.000554991	-97.3	0.00052925	-128	0.396238	-117.8	0.0734687	-114	0.0831536	0.800667	0.0418689	-63.3	0.00918961	0.0498573	0.16085	-79	0.0253398	-71.7	0.00178132	-102.7	0.548783	-95.5	0.118452	-70.1	0.615188	-41.3	0.00769055	-41.3	0.0540273	-47.3	0.268335	-88.3
-91.7	5.15186e-05	-91.7	0.16634	-87.1	0.00682721	-87.1	0.141734	-124.6		0.185285		0.539665	-91.5	0.359001	0.138289	0.179783	-114.8	0.00216175	-97	0.00199314	-127.7	0.881225	-117.4	0.0446042	-113.6	0.180953	0.240544	0.473406	-62.9	0.00278014	0.00019157	0.212316	-78.7	0.0112815	-71.4	0.000307967	-102.3	0.275465	-95.1	0.430127	-69.7	0.805073	-40.9	0.00452966	-40.9	0.00557278	-47	0.137686	-87.9
-91.3	2.01124e-05	-91.3	0.0155788	-86.7	0.0109897	-86.7	0.0783224	-124.2		0.310845		0.680767	-91.1	0.460986	0.184224	0.653478	-114.4	0.00308281	-96.6	0.00186276	-127.3	0.919416	-117	0.0188	-113.3	0.195566	0.606043	0.399642	-62.5	0.00795131	0.0397469	0.14253	-78.4	0.00612843	-71.1	0.000748325	-101.9	0.30713	-94.7	0.452105	-69.3	0.224947	-40.5	0.00466869	-40.5	0.0619146	-46.6	0.532425	-87.5
-90.9	4.55495e-07	-90.9	0.00941639	-86.4	0.00168763	-86.4	0.0380746	-123.9		0.27008		0.903829	-90.8	0.0889925	0.0825391	0.17816	-114	0.00315539	-96.2	0.00282508	-126.9	0.41277	-116.7	0.0340378	-112.9	0.00843121	0.0914924	0.303985	-62.1	0.0330639	0.00450041	0.926714	-78	0.0091189	-70.7	0.000169728	-101.5	0.0180831	-94.3	0.091439	-68.9	0.00822115	-40.2	0.00408233	-40.2	0.284735	-46.2	0.684412	-87.1
-90.5	4.35729e-07	-90.5	0.0418705	-86	0.00775597	-86	0.107872	-123.5		0.215361		0.279196	-90.4	0.0301752	0.0161762	0.362121	-113.6	0.00410332	-95.8	0.00874506	-126.5	0.946542	-116.3	0.0845551	-112.5	0.266684	0.0190183	0.488768	-61.7	0.0251851	0.0138922	0.900428	-77.7	0.0140108	-70.4	0.00202619	-101.1	0.229436	-93.9	0.315265	-68.6	0.00370704	-39.8	0.0309018	-39.8	0.107587	-45.8	0.49547	-86.7
-90.2	1.33329e-05	-90.2	0.15992	-85.6	0.0157928	-85.6	0.016827	-123.1		0.0690638		0.0639362	-90	0.09216	0.0573995	0.608467	-113.3	0.00166566	-95.5	0.00818565	-126.1	0.657373	-115.9	0.118855	-112.1	0.0935597	0.525185	0.216544	-61.4	0.034315	0.0140541	0.556721	-77.4	0.00486914	-70.1	0.000630244	-100.8	0.242513	-93.6	0.174876	-68.2	0.0146271	-39.4	0.0307215	-39.4	0.565021	-45.5	0.31307	-86.4
-89.8	1.08945e-06	-89.8	0.0901737	-85.2	0.0339465	-85.2	0.0150753	-122.7		0.12152		0.233412	-89.6	0.708391	0.367493	0.384353	-112.9	0.000381756	-95.1	0.00849786	-125.8	0.401408	-115.5	0.0200626	-111.7	0.784589	0.657171	0.892324	-61	0.107957	0.0455178	0.302326	-77	0.0451555	-69.7	0.00829346	-100.4	0.838849	-93.2	0.0562056	-67.8	0.174256	-39	0.190171	-39	0.221427	-45.1	0.690008	-86
-89.4	3.65767e-06	-89.4	0.122381	-84.8	0.421768	-84.8	0.0358856	-122.3		0.0682718		0.0675197	-89.2	0.283906	0.113718	0.608966	-112.5	0.000337643	-94.7	0.00782714	-125.4	0.571417	-115.2	0.0373164	-111.4	0.0457253	0.32783	0.260665	-60.6	0.137063	0.0316181	0.185918	-76.7	0.0321535	-69.4	0.00887004	-100	0.522514	-92.8	0.229029	-67.4	0.0404189	-38.6	0.188883	-38.6	0.339576	-44.7	0.54264	-85.6
-89	8.45792e-06	-89	0.87802	-84.5	0.536557	-84.5	0.0269601	-122		0.180987		0.128499	-88.9	0.0476537	0.0772123	0.283506	-112.1	0.000229981	-94.3	0.00785245	-125	0.837386	-114.8	0.0379204	-111	0.650472	0.426899	0.722023	-60.2	0.387232	0.176827	0.338568	-76.4	0.0445474	-69.1	0.00122655	-99.6	0.105831	-92.4	0.209606	-67	0.0213683	-38.3	0.0545459	-38.3	0.458696	-44.3	0.166008	-85.2
-88.6	9.20963e-06	-88.6	0.966533	-84.1	0.109873	-84.1	0.026237	-121.6	0.0126782	0.0293965	0.815595	0.0174865	-88.5	0.00564989	0.0516854	0.0597346	-111.7	0.000130131	-93.9	0.00302428	-124.6	0.638681	-114.4	0.0236346	-110.6	0.0509574	0.041158	0.695906	-59.8	0.1087	0.0167322	0.860426	-76.1	0.00878299	-68.7	0.000562366	-99.2	0.0146278	-92	0.0213501	-66.7	0.130141	-37.9	0.110644	-37.9	0.222449	-43.9	0.153106	-84.8
-88.3	5.87408e-05	-88.3	0.517656	-83.7	0.0596994	-83.7	0.0451584	-121.2	0.0117162	0.123413	0.3222	0.0919218	-88.1	0.080338	0.453336	0.384103	-111.4	0.000205425	-93.6	0.00501567	-124.2	0.76164	-114	0.0406725	-110.2	0.110523	0.182248	0.436989	-59.5	0.16191	0.0284866	0.519929	-75.7	0.00958477	-68.4	0.00259551	-98.9	0.0115332	-91.7	0.143457	-66.3	0.261844	-37.5	0.0424181	-37.5	0.370852	-43.6	0.649438	-84.5
-87.9	0.000165953	-87.9	0.508853	-83.3	0.0299991	-83.3	0.0626457	-120.8	0.0177462	0.153709	0.312761	0.583097	-87.7	0.0888409	0.355186	0.106691	-111	7.25248e-05	-93.2	0.00545793	-123.9	0.65649	-113.6	0.038294	-109.8	0.0307125	0.463619	0.130955	-59.1	0.463006	0.0816942	0.531466	-75.4	0.0752028	-68.1	0.000940618	-98.5	0.0104241	-91.3	0.0488049	-65.9	0.225279	-37.1	0.0406016	-37.1	0.215064	-43.2	0.752178	-84.1
-87.5	0.000100529	-87.5	0.817016	-83	0.070792	-83	0.0225827	-120.5	0.0403288	0.226863	0.161451	0.943937	-87.4	0.117892	0.35393	0.280231	-110.6	0.000224718	-92.8	0.00420783	-123.5	0.916353	-113.3	0.0756164	-109.5	0.0948028	0.368806	0.535151	-58.7	0.596883	0.15567	0.454044	-75.1	0.0922327	-67.8	0.00244933	-98.1	0.0711457	-90.9	0.00827922	-65.5	0.254902	-36.7	0.00347804	-36.7	0.0859429	-42.8	0.475497	-83.7
-87.1	0.000243225	-87.1	0.389194	-82.6	0.273818	-82.6	0.117051	-120.1	0.00776042	0.0263717	0.449725	0.811332	-87	0.299164	0.180551	0.645224	-110.2	0.000552451	-92.4	0.00442822	-123.1	0.499807	-112.9	0.00915353	-109.1	0.0297891	0.00705619	0.844613	-58.3	0.229418	0.013317	0.453818	-74.7	0.0935335	-67.4	0.000433535	-97.7	0.0372272	-90.5	0.025773	-65.2	0.258664	-36.4	0.000178303	-36.4	0.0503693	-42.4	0.607656	-83.3
-86.7	0.00028769	-86.7	0.324147	-82.2	0.0618569	-82.2	0.125935	-119.7	0.0235781	0.0630585	0.676716	0.202359	-86.6	0.89768	0.470826	0.997804	-109.8	0.000944368	-92	0.00334235	-122.7	0.454485	-112.5	0.00158072	-108.7	0.00380184	0.00047493	0.29916	-58	0.0150513	0.0128533	0.783507	-74.4	0.0898561	-67.1	0.00089544	-97.3	0.0168027	-90.2	0.030653	-64.8	0.096074	-36	0.0159524	-36	0.0275034	-42	0.492927	-83
-86.4	0.000113215	-86.4	0.14166	-81.8	0.0944834	-81.8	0.223172	-119.3	0.0245786	0.0244867	0.899237	0.0735583	-86.2	0.768624	0.910268	0.624529	-109.5	0.000547557	-91.7	0.0068855	-122.3	0.620337	-112.1	0.022365	-108.3	0.00054689	0.117153	0.0450318	-57.6	0.0753865	0.0286295	0.963841	-74.1	0.0571739	-66.8	0.0009014	-97	0.0402977	-89.8	0.00491205	-64.4	0.224319	-35.6	0.0503867	-35.6	0.0350657	-41.7	0.513524	-82.6
-86	0.000345748	-86	0.30248	-81.4	0.117722	-81.4	0.15954	-118.9	0.0046486	0.0175351	0.480357	0.205566	-85.8	0.80083	0.445827	0.868564	-109.1	7.91426e-05	-91.3	0.00780575	-122	0.193047	-111.7	0.00861186	-108	0.0917026	0.814174	0.211518	-57.2	0.00686311	0.03655	0.192522	-73.7	0.0385642	-66.4	0.00514764	-96.6	0.0225761	-89.4	0.0837054	-64	0.258136	-35.2	0.00630921	-35.2	0.0322108	-41.3	0.164014	-82.2
-85.6	0.000349713	-85.6	0.0836039	-81.1	0.20704	-81.1	0.0781697	-118.6	0.0104469	0.017178	0.827362	0.123095	-85.5	0.984226	0.654402	0.891955	-108.7	7.81963e-05	-90.9	0.00651968	-121.6	0.105428	-111.4	0.00288596	-107.6	0.38899	0.648679	0.572738	-56.8	0.0230018	0.0565474	0.322363	-73.4	0.0394598	-66.1	0.00619857	-96.2	0.022759	-89	0.241995	-63.6	0.101486	-34.8	0.00611334	-34.8	0.0785626	-40.9	0.242284	-81.8
-85.2	0.00015383	-85.2	0.858726	-80.7	0.0330944	-80.7	0.138393	-118.2	0.00289904	0.00852644	0.6281	0.169846	-85.1	0.364698	0.861744	0.298153	-108.3	0.000210284	-90.5	0.00587081	-121.2	0.0781174	-111	0.012149	-107.2	0.366007	0.399018	0.881651	-56.4	0.014565	0.0496393	0.182547	-73.1	0.040598	-65.8	0.000864029	-95.8	0.0404816	-88.6	0.264638	-63.3	0.231762	-34.5	0.00200535	-34.5	0.0179023	-40.5	0.33612	-81.4
-84.8	0.00012888	-84.8	0.821087	-80.3	0.00957356	-80.3	0.103906	-117.8	0.00556096	0.0116928	0.77321	0.177144	-84.7	0.174146	0.800375	0.806844	-108	0.000403829	-90.2	0.00128721	-120.8	0.00699989	-110.6	0.0134331	-106.8	0.174473	0.769798	0.159741	-56.1	0.0002768	0.00224982	0.0856723	-72.7	0.0153579	-65.4	0.00157913	-95.5	0.10149	-88.3	0.16761	-62.9	0.568891	-34.1	0.0175365	-34.1	0.0127649	-40.2	0.217302	-81.1
-84.5	0.000803735	-84.5	0.82081	-79.9	0.000764825	-79.9	0.12779	-117.4	0.00206851	0.015902	0.536586	0.303248	-84.3	0.663193	0.150421	0.118574	-107.6	0.000389686	-89.8	0.00129155	-120.5	0.000919428	-110.2	0.00244222	-106.4	0.290901	0.653555	0.43351	-55.7	0.000182055	0.00144996	0.251912	-72.4	0.0132498	-65.1	9.1529e-05	-95.1	0.0322548	-87.9	0.0697961	-62.5	0.472501	-33.7	0.00690785	-33.7	0.0298057	-39.8	0.190091	-80.7
-84.1	0.00204827	-84.1	0.621106	-79.5	0.000874816	-79.5	0.0536361	-117	0.0108919	0.0203381	0.545601	0.148354	-84	0.356424	0.0573102	0.41122	-107.2	0.000345948	-89.4	0.00010289	-120.1	0.00674468	-109.8	0.00285177	-106.1	0.0471436	0.00497633	0.976413	-55.3	0.000830191	0.00144745	0.650058	-72.1	0.00509151	-64.8	0.00148504	-94.7	0.307957	-87.5	0.216657	-62.1	0.523042	-33.3	0.012163	-33.3	0.14101	-39.4	0.164802	-80.3
-83.7	0.000521554	-83.7	0.895202	-79.2	0.00159604	-79.2	0.0483255	-116.7	0.0137976	0.0183069	0.602508	0.623277	-83.6	0.117212	0.145529	0.709864	-106.8	0.000263007	-89	4.41972e-05	-119.7	0.0461625	-109.5	0.0220038	-105.7	0.0664397	0.0449779	0.951751	-54.9	0.00407976	0.00161742	0.769002	-71.7	0.00486854	-64.4	0.000602064	-94.3	0.143858	-87.1	0.0913793	-61.7	0.2776	-33	0.0212488	-33	0.154082	-39	0.233218	-79.9
-83.3	0.000152083	-83.3	0.833342	-78.8	0.0835889	-78.8	0.00308036	-116.3	0.0285326	0.02562	0.652454	0.647241	-83.2	0.259013	0.0403524	0.481141	-106.4	0.000711083	-88.6	0.000607016	-119.3	0.0231472	-109.1	0.0426511	-105.3	0.11297	0.00489462	0.510331	-54.5	0.0173884	0.0163951	0.8203	-71.4	0.00341912	-64.1	0.000393357	-93.9	0.0713316	-86.7	0.152621	-61.4	0.342698	-32.6	0.00471463	-32.6	0.105843	-38.6	0.237741	-79.5
-83	9.85544e-05	-83	0.915809	-78.4	0.0534803	-78.4	0.0907481	-115.9	0.0282016	0.0494286	0.581804	0.156513	-82.8	0.429501	0.0514392	0.4746	-106.1	0.000476156	-88.3	0.00017684	-118.9	0.242834	-108.7	0.035718	-104.9	0.0536888	0.121735	0.61633	-54.2	0.0084966	0.0170264	0.400191	-71.1	0.00242883	-63.8	0.000165852	-93.6	0.0752958	-86.4	0.570788	-61	0.899104	-32.2	0.0020742	-32.2	0.0400709	-38.3	0.172462	-79.2
-82.6	0.000127719	-82.6	0.898185	-78	0.0134011	-78	0.267646	-115.5	0.00969388	0.0392291	0.508441	0.214559	-82.4	0.0187784	0.00631855	0.0357517	-105.7	0.000417309	-87.9	0.00104709	-118.6	0.258612	-108.3	0.0402031	-104.5	0.0196845	0.131553	0.433662	-53.8	0.00864186	0.00933719	0.613708	-70.7	0.00360635	-63.4	0.000271731	-93.2	0.0237234	-86	0.481152	-60.6	0.820034	-31.8	0.0103207	-31.8	0.203096	-37.9	0.790018	-78.8
-82.2	0.000135813	-82.2	0.476904	-77.7	0.00633349	-77.7	0.0483084	-115.2	0.0703752	0.175797	0.459644	0.756986	-82.1	0.666977	0.0383736	0.751856	-105.3	0.00129879	-87.5	0.000674616	-118.2	0.212707	-108	0.0193498	-104.2	0.0017587	0.0604311	0.0652146	-53.4	0.00484356	0.0126071	0.246758	-70.4	0.00679031	-63.1	0.000436038	-92.8	0.0134019	-85.6	0.124986	-60.2	0.199321	-31.4	0.0407466	-31.4	0.0910423	-37.5	0.764453	-78.4
-81.8	2.76175e-05	-81.8	0.52383	-77.3	0.0176247	-77.3	0.0063569	-114.8	0.0575165	0.389094	0.30988	0.769894	-81.7	0.569544	0.692555	0.423386	-104.9	0.00366335	-87.1	0.00119608	-117.8	0.0875222	-107.6	0.0320966	-103.8	0.133995	0.0211384	0.755383	-53	0.0144427	0.0167522	0.813926	-70.1	0.00903385	-62.8	0.00109564	-92.4	0.00804052	-85.2	0.188166	-59.8	0.104437	-31.1	0.00794721	-31.1	0.0455115	-37.1	0.96593	-78
-81.4	3.20736e-05	-81.4	0.193189	-76.9	0.178137	-76.9	0.0540521	-114.4	0.016865	0.0585505	0.329719	0.894446	-81.3	0.261844	0.608817	0.606102	-104.5	0.00377513	-86.7	0.00413917	-117.4	0.19797	-107.2	0.0317676	-103.4	0.00179668	0.0288704	0.194172	-52.7	0.042807	0.0238294	0.63931	-69.7	0.0122877	-62.4	0.00410747	-92	0.0247786	-84.8	0.00989571	-59.5	0.0154923	-30.7	0.00443668	-30.7	0.056035	-36.7	0.954014	-77.7
-81.1	3.26457e-05	-81.1	0.440438	-76.5	0.0749136	-76.5	0.00618141	-114	0.00262597	0.00625168	0.463492	0.144739	-80.9	0.156069	0.492231	0.602821	-104.2	0.00308096	-86.4	0.00682558	-117	0.255669	-106.8	0.0220333	-103	0.0792431	0.106916	0.401871	-52.3	0.00415227	0.00339758	0.846385	-69.4	0.0238305	-62.1	0.0279755	-91.7	0.0568529	-84.5	0.00351917	-59.1	0.0305843	-30.3	0.0116261	-30.3	0.0117602	-36.4	0.939369	-77.3
-80.7	4.13565e-05	-80.7	0.832148	-76.1	0.0120769	-76.1	0.0499996	-113.6	0.00135635	0.00208348	0.759789	0.347218	-80.6	0.094074	0.954997	0.230325	-103.8	0.00130633	-86	0.0036476	-116.7	0.195427	-106.4	0.0236305	-102.7	0.00280258	0.00819587	0.197397	-51.9	0.00347	0.00190725	0.501464	-69.1	0.0127036	-61.8	0.0242358	-91.3	0.0729801	-84.1	0.00344618	-58.7	0.037728	-29.9	8.68614e-05	-29.9	0.122523	-36	0.719202	-76.9
-80.3	4.07579e-05	-80.3	0.489146	-75.8	0.0132783	-75.8	0.0588091	-113.3	0.0106673	0.0133795	0.916535	0.184414	-80.2	0.0189526	0.504047	0.911131	-103.4	0.00268393	-85.6	0.00334679	-116.3	0.315623	-106.1	0.0146121	-102.3	0.0757955	0.0398915	0.953096	-51.5	0.0010772	0.000508796	0.355218	-68.7	0.00112637	-61.4	0.0204337	-90.9	0.0507652	-83.7	0.039872	-58.3	0.0715097	-29.5	0.000538626	-29.5	0.304725	-35.6	0.595835	-76.5
-79.9	3.62238e-05	-79.9	0.177753	-75.4	0.0289111	-75.4	0.00955011	-112.9	0.00726898	0.000292406	0.886366	0.0926112	-79.8	0.456548	0.47186	0.830093	-103	0.00341084	-85.2	0.00171325	-115.9	0.221179	-105.7	0.00644356	-101.9	0.0606885	0.0568468	0.968932	-51.1	0.000937116	0.0011339	0.851504	-68.4	0.000468785	-61.1	0.0295453	-90.5	0.0345759	-83.3	0.068733	-58	0.0304887	-29.2	0.00516733	-29.2	0.0622675	-35.2	0.460947	-76.1
-79.5	0.000109327	-79.5	0.595308	-75	0.0125588	-75	0.0044378	-112.5	0.00101333	0.000125373	0.592329	0.119707	-79.4	0.387182	0.470304	0.683046	-102.7	0.000538744	-84.8	0.00321318	-115.5	0.264605	-105.3	0.0210586	-101.5	0.0303769	0.212509	0.240404	-50.8	0.00304466	0.00416804	0.679163	-68.1	0.000691571	-60.8	0.0265611	-90.2	0.00172139	-83	0.0177202	-57.6	0.0389359	-28.8	0.0272283	-28.8	0.0442382	-34.8	0.387085	-75.8
-79.2	0.000246635	-79.2	0.552146	-74.6	0.00456823	-74.6	0.0226678	-112.1	0.00266346	5.70531e-05	0.388058	0.189813	-79	0.0540401	0.0420657	0.652194	-102.3	0.000237904	-84.5	0.00404206	-115.2	0.409061	-104.9	0.031364	-101.1	0.0205202	0.0257175	0.593248	-50.4	0.00342448	0.00148528	0.504502	-67.8	0.000715097	-60.4	0.0160977	-89.8	0.0115196	-82.6	0.0181898	-57.2	0.0223485	-28.4	0.0241411	-28.4	0.123461	-34.5	0.198428	-75.4
-78.8	3.51089e-05	-78.8	0.585635	-74.2	0.00222	-74.2	0.0184765	-111.7	0.0087899	0.000436241	0.26202	0.0824454	-78.7	0.0543387	0.208023	0.743277	-101.9	0.00017996	-84.1	0.0011899	-114.8	0.310999	-104.5	0.0247132	-100.8	0.0561948	0.020858	0.817899	-50	0.00463429	0.00186731	0.847873	-67.4	0.000344066	-60.1	0.00863592	-89.4	0.0128317	-82.2	0.0902416	-56.8	0.102497	-28	0.0212842	-28	0.185638	-34.1	0.462342	-75
-78.4	4.70519e-05	-78.4	0.254533	-73.9	0.00042122	-73.9	0.00280058	-111.4	0.0189585	0.00901512	0.5224	0.372891	-78.3	0.0742347	0.0891183	0.546424	-101.5	4.79918e-05	-83.7	0.000512109	-114.4	0.117641	-104.2	0.0774287	-100.4	0.0935467	0.130254	0.723994	-49.6	0.00166198	0.000441628	0.979885	-67.1	0.000194869	-59.8	0.00180079	-89	0.0078102	-81.8	0.129684	-56.4	0.171072	-27.7	0.0130539	-27.7	0.599962	-33.7	0.620251	-74.6
-78	7.7881e-05	-78	0.347882	-73.5	0.00670856	-73.5	0.00545346	-111	0.000475545	0.000923814	0.785033	0.25976	-77.9	0.368233	0.262418	0.530734	-101.1	0.000184076	-83.3	0.00240554	-114	0.130604	-103.8	0.0337284	-100	0.000219975	0.00156307	0.673433	-49.2	0.00277761	0.0026908	0.893084	-66.8	0.000187184	-59.4	0.00263079	-88.6	0.00122963	-81.4	0.29317	-56.1	0.00871806	-27.3	0.000633905	-27.3	0.109715	-33.3	0.8039	-74.2
-77.7	4.52865e-05	-77.7	0.93226	-73.1	0.0146568	-73.1	0.0113486	-110.6	0.000423931	7.72472e-06	0.0889203	0.0386196	-77.5	0.228	0.0551157	0.376828	-100.8	3.34379e-05	-83	0.00975635	-113.6	0.0677779	-103.4	0.0122038	-99.6	0.00429869	0.0862176	0.194809	-48.9	0.00585814	0.00133965	0.28016	-66.4	0.00224281	-59.1	0.0149835	-88.3	0.0638139	-81.1	0.277574	-55.7	0.0606833	-26.9	0.0290183	-26.9	0.132812	-33	0.984093	-73.9
-77.3	6.2978e-05	-77.3	0.726944	-72.7	0.0163126	-72.7	0.0171512	-110.2	0.0125734	0.00266464	0.242419	0.344249	-77.1	0.306529	0.359495	0.436285	-100.4	3.37512e-06	-82.6	0.0106269	-113.3	0.0210226	-103	0.029075	-99.2	0.155854	0.457948	0.347398	-48.5	0.000187799	1.34913e-05	0.173275	-66.1	0.00767327	-58.8	0.0682163	-87.9	0.0697867	-80.7	0.184201	-55.3	0.17258	-26.5	0.0014973	-26.5	0.120373	-32.6	0.555167	-73.5
-76.9	0.000248389	-76.9	0.976857	-72.3	0.0766936	-72.3	0.0213963	-109.8	0.00480997	0.00254109	0.694073	0.510543	-76.8	0.150133	0.438489	0.0918819	-100	3.29689e-05	-82.2	0.0211757	-112.9	0.0871535	-102.7	0.043992	-98.9	0.00313367	0.0287564	0.176889	-48.1	2.05625e-05	4.16421e-07	0.369875	-65.8	0.00750565	-58.5	0.0133455	-87.5	0.0103108	-80.3	0.0588265	-54.9	0.317869	-26.1	0.00126565	-26.1	0.0538665	-32.2	0.182002	-73.1
-76.5	0.00216176	-76.5	0.692714	-72	0.0256063	-72	0.142459	-109.5	0.00306726	0.00179282	0.853027	0.352683	-76.4	0.46666	0.471266	0.0599048	-99.6	0.000478632	-81.8	0.0179925	-112.5	0.169864	-102.3	0.0451687	-98.5	0.0127098	0.00654254	0.412029	-47.7	0.00053176	0.000144027	0.495261	-65.4	0.00512111	-58.1	0.00735303	-87.1	0.00612303	-79.9	0.179903	-54.5	0.334369	-25.8	0.0186411	-25.8	0.0343333	-31.8	0.238508	-72.7
-76.1	0.00240907	-76.1	0.179418	-71.6	0.0176002	-71.6	0.0119333	-109.1	0.000106414	5.89646e-05	0.743147	0.31546	-76	0.502302	0.478872	0.201429	-99.2	0.000815744	-81.4	0.0102122	-112.1	0.0770044	-101.9	0.00649911	-98.1	0.00686194	0.00247675	0.825812	-47.3	0.00457801	0.00145286	0.73151	-65.1	0.00711422	-57.8	0.000562738	-86.7	0.00577152	-79.5	0.125537	-54.2	0.277203	-25.4	0.00973246	-25.4	0.0388294	-31.4	0.172591	-72.3
-75.8	0.000227796	-75.8	0.963506	-71.2	0.0140408	-71.2	0.00681133	-108.7	0.0013173	0.00100344	0.76749	0.285928	-75.6	0.226489	0.232135	0.552708	-98.9	0.000418381	-81.1	0.0116644	-111.7	0.142686	-101.5	0.00795033	-97.7	0.11021	0.0261623	0.459015	-47	0.0086608	0.00228967	0.369387	-64.8	0.0072003	-57.5	9.97379e-06	-86.4	0.000580336	-79.2	0.354754	-53.8	0.281082	-25	0.00104984	-25	0.0493327	-31.1	0.0685653	-72
-75.4	0.000160561	-75.4	0.461731	-70.8	0.0523907	-70.8	0.0346429	-108.3	0.000799621	0.000409141	0.941577	0.614786	-75.3	0.0958848	0.171854	0.80101	-98.5	0.000551359	-80.7	0.00655067	-111.4	0.0642103	-101.1	0.0026951	-97.3	0.00379809	0.192441	0.0694497	-46.6	0.00692602	0.0023051	0.399095	-64.4	0.00575141	-57.1	0.000616711	-86	0.00131893	-78.8	0.576228	-53.4	0.332546	-24.6	0.0201987	-24.6	0.000999437	-30.7	0.086554	-71.6
-75	2.8031e-05	-75	0.94716	-70.5	0.0153883	-70.5	0.0777664	-108	0.00478654	0.00219296	0.856155	0.726686	-74.9	0.124938	0.160102	0.286598	-98.1	0.000603224	-80.3	0.00190837	-111	0.0221449	-100.8	0.00393102	-97	0.508808	0.417601	0.962348	-46.2	0.00224823	0.000634426	0.305712	-64.1	0.00112952	-56.8	0.00191148	-85.6	0.0208708	-78.4	0.165926	-53	0.103095	-24.2	0.00369126	-24.2	0.0109887	-30.3	0.0807231	-71.2
-74.6	5.05068e-06	-74.6	0.586244	-70.1	0.01101	-70.1	0.02067	-107.6	0.00288733	0.00496195	0.572917	0.134366	-74.5	0.00735465	0.0244485	0.033855	-97.7	2.44561e-05	-79.9	0.000282776	-110.6	0.0257955	-100.4	0.00629856	-96.6	0.00507671	0.0541377	0.38931	-45.8	0.0023146	0.00253006	0.872858	-63.8	0.00340813	-56.5	0.000543505	-85.2	0.00391704	-78	0.0338005	-52.7	0.0273773	-23.9	0.00125546	-23.9	0.0132034	-29.9	0.117896	-70.8
-74.2	5.8292e-06	-74.2	0.425967	-69.7	0.0197322	-69.7	0.0416384	-107.2	0.00061242	0.000985848	0.625473	0.343415	-74.1	0.00479337	0.00242833	0.00282888	-97.3	0.000287865	-79.5	0.000899086	-110.2	0.0609673	-100	0.0119191	-96.2	0.00928183	0.0726248	0.126871	-45.5	0.000122355	0.000158054	0.648121	-63.4	0.000175491	-56.1	0.000571669	-84.8	0.0241134	-77.7	0.0596246	-52.3	0.0833199	-23.5	0.00742552	-23.5	0.197623	-29.5	0.12695	-70.5
-73.9	1.9747e-05	-73.9	0.165128	-69.3	0.0259001	-69.3	0.148593	-106.8	0.000805616	0.000751911	0.812774	0.246367	-73.7	0.0458554	0.0213679	0.391101	-97	0.000532675	-79.2	0.00239435	-109.8	0.0658642	-99.6	0.00776101	-95.8	0.00381804	0.0700219	0.0641077	-45.1	0.000170691	9.03069e-05	0.957622	-63.1	0.000129685	-55.8	0.00895983	-84.5	0.010512	-77.3	0.0371255	-51.9	0.0657829	-23.1	0.00905756	-23.1	0.116225	-29.2	0.070221	-70.1
-73.5	2.14005e-05	-73.5	0.503441	-68.9	0.0865792	-68.9	0.0737248	-106.4	0.0153816	0.00610057	0.197096	0.18662	-73.4	0.0657954	0.0105888	0.81522	-96.6	0.000930958	-78.8	0.00188768	-109.5	0.0339599	-99.2	0.00168665	-95.5	0.00137223	0.0216246	0.0713981	-44.7	0.000110482	1.39828e-05	0.849192	-62.8	0.000254914	-55.5	0.0114864	-84.1	0.0113546	-76.9	0.0506821	-51.5	0.0671624	-22.7	0.0959443	-22.7	0.0405234	-28.8	0.131401	-69.7
-73.1	0.000157861	-73.1	0.516064	-68.6	0.0733018	-68.6	0.0415605	-106.1	0.00787228	0.00122195	0.081816	0.577071	-73	0.00856589	0.0445355	0.418152	-96.2	0.00016161	-78.4	0.00483373	-109.1	0.147916	-98.9	0.0110289	-95.1	0.00215116	0.0332216	0.0693262	-44.3	0.00106537	0.000100301	0.952512	-62.4	0.00036367	-55.1	0.0206168	-83.7	7.59315e-05	-76.5	0.108659	-51.1	0.233793	-22.3	0.0601514	-22.3	0.0697831	-28.4	0.0662696	-69.3
-72.7	0.00315385	-72.7	0.936129	-68.2	0.119311	-68.2	0.0493607	-105.7	0.00783853	0.00161629	0.0665822	0.249499	-72.6	0.024528	0.344217	0.600436	-95.8	0.000142586	-78	0.00703003	-108.7	0.608309	-98.5	0.0093391	-94.7	0.00938099	0.00540508	0.318385	-43.9	0.000908198	0.000627224	0.796481	-62.1	0.000255083	-54.8	0.0573299	-83.3	0.00491618	-76.1	0.06903	-50.8	0.668694	-22	0.0409517	-22	0.166578	-28	0.226723	-68.9
-72.3	4.69096e-05	-72.3	0.919173	-67.8	0.068124	-67.8	0.024378	-105.3	0.000942018	0.00040364	0.396239	0.267897	-72.2	0.542821	0.723704	0.251867	-95.5	0.000491387	-77.7	0.00311505	-108.3	0.535328	-98.1	0.00473694	-94.3	0.00497735	0.00190839	0.513011	-43.6	0.00203027	0.00238454	0.822337	-61.8	0.000296628	-54.5	0.0216157	-83	0.00415852	-75.8	0.0365863	-50.4	0.253001	-21.6	0.00185501	-21.6	0.0556949	-27.7	0.442947	-68.6
-72	1.26286e-06	-72	0.29703	-67.4	0.0840835	-67.4	0.0120562	-104.9	0.00192624	0.00266721	0.965632	0.430669	-71.9	0.573428	0.38904	0.81795	-95.1	0.000844671	-77.3	0.00348164	-108	0.970052	-97.7	0.00579885	-93.9	0.000852732	0.0128198	0.249517	-43.2	0.00410634	0.00424269	0.980834	-61.4	0.000272326	-54.1	0.0373759	-82.6	0.00347079	-75.4	0.0357645	-50	0.0521811	-21.2	0.0368061	-21.2	0.167168	-27.3	0.268518	-68.2
-71.6	2.61695e-06	-71.6	0.912781	-67	0.0580126	-67	0.00513886	-104.5	0.000200328	5.74019e-05	0.368582	0.264694	-71.5	0.187243	0.979963	0.800728	-94.7	0.000499128	-76.9	0.0132055	-107.6	0.628649	-97.3	0.00550435	-93.6	0.00048317	0.516818	0.00545212	-42.8	0.00280422	0.00420797	0.467408	-61.1	2.88464e-05	-53.8	0.0328715	-82.2	0.0292487	-75	0.0239335	-49.6	0.0339345	-20.8	0.00349691	-20.8	0.133459	-26.9	0.166733	-67.8
-71.2	2.87187e-06	-71.2	0.398784	-66.7	0.0948478	-66.7	0.0116395	-104.2	1.66483e-05	7.5758e-06	0.47393	0.029125	-71.1	0.102488	0.837186	0.764012	-94.3	0.000508375	-76.5	0.0166891	-107.2	0.152882	-97	0.018946	-93.2	0.0144009	0.0355094	0.301894	-42.4	0.00286761	0.00442454	0.513514	-60.8	3.981e-05	-53.5	0.0159897	-81.8	0.0288481	-74.6	0.00745323	-49.2	0.0408728	-20.5	0.03836	-20.5	0.287532	-26.5	0.120477	-67.4
-70.8	0.000258349	-70.8	0.200798	-66.3	0.0995694	-66.3	0.0202357	-103.8	0.000112844	5.54951e-05	0.448075	0.0846604	-70.7	0.0243032	0.807045	0.273142	-93.9	0.000874605	-76.1	0.00790135	-106.8	0.176643	-96.6	0.00448079	-92.8	0.00683884	0.00274202	0.910621	-42	0.00294956	0.00215308	0.988004	-60.4	0.000141568	-53.1	0.0250042	-81.4	0.0741406	-74.2	0.00579314	-48.9	0.151431	-20.1	0.0343344	-20.1	0.211887	-26.1	0.271044	-67
-70.5	0.000230791	-70.5	0.449845	-65.9	0.382018	-65.9	0.00778021	-103.4	5.23988e-05	0.000175548	0.781285	0.0916665	-70.3	0.00218108	0.0232281	0.761705	-93.6	0.000608341	-75.8	0.00528991	-106.4	0.105144	-96.2	0.00538218	-92.4	0.00190332	0.0304296	0.301501	-41.7	0.00966933	0.00969412	0.991253	-60.1	0.000266818	-52.8	0.0376426	-81.1	0.0431669	-73.9	0.102861	-48.5	0.160115	-19.7	0.0266224	-19.7	0.144592	-25.8	0.412783	-66.7
-70.1	0.000701207	-70.1	0.290218	-65.5	0.0142173	-65.5	0.0418294	-103	5.14792e-05	5.79106e-05	0.994285	0.308775	-70	0.018894	0.128816	0.804188	-93.2	0.000574313	-75.4	0.00574311	-106.1	0.068797	-95.8	0.0322692	-92	0.000349296	0.0138676	0.334169	-41.3	0.0102501	0.0118183	0.777189	-59.8	0.000195297	-52.5	0.0332945	-80.7	0.0219542	-73.5	0.095651	-48.1	0.303416	-19.3	0.0301803	-19.3	0.0172388	-25.4	0.273921	-66.3
-69.7	0.000820429	-69.7	0.68466	-65.2	0.069895	-65.2	0.00866866	-102.7	0.00012829	0.000682481	0.146497	0.0420791	-69.6	0.0893661	0.0390077	0.774804	-92.8	0.000136312	-75	0.00571802	-105.7	0.0235334	-95.5	0.0164966	-91.7	0.00040357	0.000372157	0.21904	-40.9	0.00317893	0.00246748	0.668915	-59.4	0.00109671	-52.1	0.0484119	-80.3	0.00803548	-73.1	0.151151	-47.7	0.261214	-18.9	0.0213498	-18.9	0.0125585	-25	0.471513	-65.9
-69.3	0.000419489	-69.3	0.982963	-64.8	0.153553	-64.8	0.0110111	-102.3	0.000118427	0.000143095	0.387421	0.0676248	-69.2	0.0203414	0.204052	0.814872	-92.4	0.000187391	-74.6	0.00884575	-105.3	0.0244153	-95.1	0.009431	-91.3	3.1571e-05	0.0489164	0.000503823	-40.5	0.00209063	0.00141988	0.636835	-59.1	0.00250888	-51.8	0.0355109	-79.9	0.0575608	-72.7	0.11319	-47.3	0.041311	-18.6	0.000970458	-18.6	0.0101849	-24.6	0.323598	-65.5
-68.9	0.00049497	-68.9	0.252989	-64.4	0.109834	-64.4	0.0252488	-101.9	7.17007e-05	0.000125079	0.681792	0.101432	-68.8	0.0268139	0.180554	0.442821	-92	0.000206629	-74.2	0.00446203	-104.9	0.027077	-94.7	0.0560549	-90.9	0.00191503	0.020916	0.150528	-40.2	0.000568939	0.000443317	0.897163	-58.8	0.000479421	-51.5	0.0370222	-79.5	0.0246794	-72.3	0.116887	-47	0.0026073	-18.2	0.00267742	-18.2	0.000565909	-24.2	0.361823	-65.2
-68.6	0.0022787	-68.6	0.902258	-64	0.192158	-64	0.0674078	-101.5	5.09719e-05	4.17992e-05	0.368489	0.0357434	-68.5	0.0178272	0.283859	0.845377	-91.7	0.000812707	-73.9	0.00696908	-104.5	0.0156201	-94.3	0.0154632	-90.5	0.038008	0.0150371	0.417513	-39.8	0.00267414	0.00246049	0.945226	-58.5	0.000766673	-51.1	0.0563811	-79.2	0.00549718	-72	0.229305	-46.6	0.0136378	-17.8	0.0319814	-17.8	0.00553541	-23.9	0.403001	-64.8
-68.2	0.000594371	-68.2	0.618704	-63.6	0.434758	-63.6	0.0773695	-101.1	7.69611e-07	7.62656e-06	0.118753	0.585321	-68.1	0.00700126	0.0993586	0.799831	-91.3	0.000844093	-73.5	0.0119408	-104.2	0.05679	-93.9	0.00325582	-90.2	0.000189388	0.0532301	0.0980755	-39.4	0.00502702	0.000602372	0.760263	-58.1	0.00141504	-50.8	0.13889	-78.8	0.0238808	-71.6	0.103961	-46.2	0.0398616	-17.4	0.0362821	-17.4	0.285151	-23.5	0.110295	-64.4
-67.8	0.000495424	-67.8	0.321114	-63.3	0.0913914	-63.3	0.0295515	-100.8	4.45264e-06	6.89594e-06	0.569513	0.037827	-67.7	0.00298532	0.00281295	0.20038	-90.9	5.52984e-05	-73.1	0.00867654	-103.8	0.28172	-93.6	0.00630188	-89.8	0.0125965	0.0208584	0.345354	-39	0.000160841	2.66503e-05	0.998513	-57.8	0.0021458	-50.5	0.124324	-78.4	0.00900217	-71.2	0.33083	-45.8	0.038877	-17	0.0111418	-17	0.4132	-23.1	0.137422	-64
-67.4	0.000179397	-67.4	0.297485	-62.9	0.0608721	-62.9	0.0406808	-100.4	5.22536e-05	7.27774e-05	0.662552	0.286333	-67.3	0.0204967	0.00214246	0.221597	-90.5	2.23608e-05	-72.7	0.0102533	-103.4	0.141917	-93.2	0.0101744	-89.4	1.95912e-05	0.0209224	0.0117183	-38.6	0.000132545	4.64458e-05	0.768636	-57.5	0.00657881	-50.1	0.186166	-78	0.0362852	-70.8	0.0207516	-45.5	0.0580365	-16.7	0.0163136	-16.7	0.215325	-22.7	0.24916	-63.6
-67	2.25547e-05	-67	0.415639	-62.5	0.0171914	-62.5	0.0528798	-100	2.38067e-05	3.02142e-05	0.887756	0.682548	-66.9	0.0310121	0.0586107	0.259678	-90.2	0.000125255	-72.3	0.00445867	-103	0.162235	-92.8	0.00265795	-89	0.00074135	0.0598087	0.0143074	-38.3	7.33922e-06	1.18184e-05	0.189961	-57.1	0.00405099	-49.8	0.0911631	-77.7	0.0211325	-70.5	0.099534	-45.1	0.174271	-16.3	0.0670591	-16.3	0.957492	-22.3	0.0504379	-63.3
-66.7	7.3459e-05	-66.7	0.407583	-62.1	0.0488502	-62.1	0.0551122	-99.6	4.02451e-05	5.30383e-05	0.716848	0.736847	-66.6	0.058166	0.238768	0.671863	-89.8	0.000195324	-72	0.0018819	-102.7	0.265956	-92.4	0.00559352	-88.6	0.00242044	0.0252646	0.15946	-37.9	5.01708e-05	1.29318e-06	0.78322	-56.8	0.0135131	-49.5	0.0400149	-77.3	0.0352671	-70.1	0.143688	-44.7	0.108289	-15.9	0.0233923	-15.9	0.669063	-22	0.0491697	-62.9
-66.3	0.000191919	-66.3	0.0525703	-61.7	0.0537621	-61.7	0.0149727	-99.2	5.31486e-05	0.000162169	0.177161	0.324717	-66.2	0.437437	0.690637	0.215885	-89.4	0.000324101	-71.6	0.00544872	-102.3	0.0426383	-92	0.00507781	-88.3	0.040206	0.0290193	0.45801	-37.5	3.17384e-05	1.57086e-05	0.966227	-56.5	0.00206209	-49.2	0.051271	-76.9	0.0267494	-69.7	0.0286515	-44.3	0.0743692	-15.5	0.0305616	-15.5	0.220259	-21.6	0.057845	-62.5
-65.9	0.000313355	-65.9	0.0638235	-61.4	0.0404437	-61.4	0.00684385	-98.9	4.32494e-05	7.85938e-05	0.285873	0.692198	-65.8	0.116961	0.292258	0.675489	-89	0.00013364	-71.2	0.00342592	-101.9	0.119397	-91.7	0.0154179	-87.9	0.000126531	0.0372207	0.0132154	-37.1	0.00075938	0.00133532	0.581215	-56.1	0.000417044	-48.8	0.0599984	-76.5	0.00241175	-69.3	0.00893925	-43.9	0.0537121	-15.2	0.0689587	-15.2	0.00929929	-21.2	0.111347	-62.1
-65.5	0.000715114	-65.5	0.417132	-61	0.0108556	-61	0.0198921	-98.5	0.000407823	0.000498928	0.389507	0.936829	-65.4	0.134664	0.276646	0.720287	-88.6	1.16007e-05	-70.8	0.00343831	-101.5	0.19918	-91.3	0.0180906	-87.5	3.66539e-05	0.195672	0.00287711	-36.7	0.000654948	0.000800883	0.649109	-55.8	0.000301548	-48.5	0.117883	-76.1	0.00853827	-68.9	0.00233269	-43.6	0.0169136	-14.8	0.000263719	-14.8	0.00611361	-20.8	0.0267534	-61.7
-65.2	0.00138976	-65.2	0.314612	-60.6	0.0148651	-60.6	0.0450249	-98.1	0.000141354	0.000205672	0.241097	0.941716	-65	0.0931216	0.391193	0.866101	-88.3	6.65468e-08	-70.5	0.00322497	-101.1	0.0220287	-90.9	0.00445901	-87.1	0.00424542	0.0242204	0.116427	-36.4	0.000304393	9.19353e-05	0.364925	-55.5	0.000270489	-48.2	0.11098	-75.8	0.008606	-68.6	0.0729781	-43.2	0.190624	-14.4	0.0250785	-14.4	0.12454	-20.5	0.042531	-61.4
-64.8	0.000852897	-64.8	0.469028	-60.2	0.0314894	-60.2	0.0473199	-97.7	0.00024406	0.000323212	0.226998	0.273207	-64.7	0.0110679	0.0627162	0.352111	-87.9	1.04732e-06	-70.1	0.00421852	-100.8	0.0344774	-90.5	0.00651618	-86.7	0.000510914	0.0988022	0.0187173	-36	0.000923715	8.81219e-07	0.619837	-55.1	7.34687e-05	-47.8	0.0456337	-75.4	0.00627028	-68.2	0.108281	-42.8	0.244239	-14	0.0572347	-14	0.126701	-20.1	0.0879983	-61
-64.4	0.00187754	-64.4	0.276856	-59.8	0.0719199	-59.8	0.0101395	-97.3	1.06955e-05	7.24739e-05	0.0760681	0.154068	-64.3	0.0146109	0.017439	0.413976	-87.5	3.28594e-06	-69.7	0.00723747	-100.4	0.0179942	-90.2	0.00395036	-86.4	6.23183e-05	0.0768747	0.00506635	-35.6	0.00273164	0.00189479	0.914569	-54.8	3.88176e-05	-47.5	0.0548357	-75	0.0147609	-67.8	0.137583	-42.4	0.369763	-13.6	0.0179741	-13.6	0.0247236	-19.7	0.123944	-60.6
-64	0.00437843	-64	0.126911	-59.5	0.113455	-59.5	0.0437089	-97	7.56277e-05	7.69795e-05	0.305079	0.589511	-63.9	0.00377758	0.0154131	0.259594	-87.1	4.43126e-05	-69.3	0.00754645	-100	0.0405355	-89.8	0.00408247	-86	3.44422e-05	0.165412	0.000221909	-35.2	0.0096561	0.00493215	0.673345	-54.5	0.000329771	-47.2	0.0705444	-74.6	0.0563151	-67.4	0.208834	-42	0.196081	-13.3	0.0501448	-13.3	0.0573298	-19.3	0.231413	-60.2
-63.6	0.000719332	-63.6	0.100764	-59.1	0.0333408	-59.1	0.028245	-96.6	1.61536e-06	6.89733e-07	0.91057	0.172396	-63.5	0.00488978	0.0264596	0.113513	-86.7	0.000262694	-68.9	0.00662558	-99.6	0.0537794	-89.4	0.00775707	-85.6	0.0139854	0.239921	0.0453097	-34.8	0.00477986	0.00238479	0.795282	-54.1	7.30943e-05	-46.8	0.088042	-74.2	0.00558475	-67	0.0181406	-41.7	0.069264	-12.9	0.0186373	-12.9	0.0260599	-18.9	0.0945143	-59.8
-63.3	0.00026742	-63.3	0.161332	-58.7	0.0353617	-58.7	0.0293493	-96.2	0.000204171	0.000396757	0.27939	0.232345	-63.2	0.0330037	0.081442	0.079371	-86.4	0.000951607	-68.6	0.00589045	-99.2	0.0109	-89	0.0169835	-85.2	0.0198931	0.16047	0.148296	-34.5	0.00307926	0.000459607	0.508668	-53.8	6.58153e-05	-46.5	0.0722146	-73.9	0.0152332	-66.7	0.075897	-41.3	0.0231786	-12.5	0.00662048	-12.5	0.216683	-18.6	0.193345	-59.5
-62.9	0.000135617	-62.9	0.233098	-58.3	0.0352833	-58.3	0.191996	-95.8	0.00140949	0.00458751	0.108511	0.103713	-62.8	0.0201623	0.141789	0.250017	-86	0.000219195	-68.2	0.00639626	-98.9	0.00579724	-88.6	0.00181202	-84.8	0.0390685	0.00804987	0.568649	-34.1	0.000430006	0.00017752	0.930549	-53.5	1.0495e-05	-46.2	0.0430622	-73.5	0.00966771	-66.3	0.304084	-40.9	0.00410342	-12.1	0.0117472	-12.1	0.301256	-18.2	0.416278	-59.1
-62.5	7.75308e-05	-62.5	0.0835873	-58	0.0558895	-58	0.00877123	-95.5	0.000498626	0.00129254	0.106036	0.0557618	-62.4	0.0115174	0.245175	0.707431	-85.6	0.000558379	-67.8	0.00320459	-98.5	0.0230952	-88.3	0.00244862	-84.5	0.00414528	0.0042629	0.747021	-33.7	1.80534e-05	3.55634e-05	0.451943	-53.1	3.28116e-06	-45.8	0.0191149	-73.1	0.00594066	-65.9	0.106655	-40.5	0.024274	-11.7	0.0275028	-11.7	0.38323	-17.8	0.603135	-58.7
-62.1	0.000352931	-62.1	0.049789	-57.6	0.090611	-57.6	0.00942515	-95.1	0.000746554	0.00365008	0.256201	0.121207	-62	0.0717628	0.400804	0.738331	-85.2	0.00123238	-67.4	0.010176	-98.1	0.0261352	-87.9	0.00365984	-84.1	0.000659289	0.00764527	0.115445	-33.3	2.44761e-06	2.50461e-06	0.165563	-52.8	2.78349e-06	-45.5	0.0241605	-72.7	0.00840127	-65.5	0.0130033	-40.2	0.0136103	-11.4	0.0432792	-11.4	0.588164	-17.4	0.4061	-58.3
-61.7	0.000723226	-61.7	0.111262	-57.2	0.0273326	-57.2	0.041081	-94.7	0.000480763	0.00145693	0.112539	0.109729	-61.6	0.0511402	0.303771	0.511585	-84.8	0.000601882	-67	0.0240545	-97.7	0.00843643	-87.5	0.00133837	-83.7	3.86694e-05	0.055627	0.000249419	-33	2.14721e-05	3.89269e-05	0.398522	-52.5	3.25602e-07	-45.2	0.0131297	-72.3	0.0135185	-65.2	0.013546	-39.8	0.0131718	-11	0.0596088	-11	0.0851945	-17	0.114611	-58
-61.4	0.000767522	-61.4	0.443818	-56.8	0.000882457	-56.8	0.0976656	-94.3	1.37623e-05	2.24161e-05	0.23058	0.322068	-61.3	0.0455197	0.490717	0.404589	-84.5	0.000219363	-66.7	0.0219706	-97.3	0.0137168	-87.1	0.000355627	-83.3	0.000962113	0.0228624	0.107975	-32.6	0.000103858	0.000247916	0.240291	-52.1	9.48901e-07	-44.8	0.0108775	-72	0.0207458	-64.8	0.124543	-39.4	0.0710382	-10.6	0.0107441	-10.6	0.0745081	-16.7	0.0197376	-57.6
-61	0.000110143	-61	0.279279	-56.4	0.0171035	-56.4	0.14996	-93.9	0.000192169	0.00186115	0.0174968	0.267436	-60.9	0.0064259	0.29198	0.609514	-84.1	0.000401155	-66.3	0.0139504	-97	0.0778239	-86.7	0.000405588	-83	0.000450797	0.079929	0.0101724	-32.2	0.00239745	0.00413886	0.563831	-51.8	1.84383e-06	-44.5	0.0335755	-71.6	0.0137566	-64.4	0.39659	-39	0.140365	-10.2	0.0377551	-10.2	0.16455	-16.3	0.0983322	-57.2
-60.6	6.49797e-05	-60.6	0.284221	-56.1	0.180469	-56.1	0.0507587	-93.6	0.000339147	0.00252857	0.082659	0.490912	-60.5	0.0100534	0.0926338	0.559675	-83.7	0.00094541	-65.9	0.00717599	-96.6	0.0406412	-86.4	0.000831851	-82.6	3.48516e-05	0.148469	0.000406525	-31.8	0.00197924	0.00191544	0.898636	-51.5	1.483e-06	-44.2	0.0430111	-71.2	0.0445035	-64	0.08956	-38.6	0.485105	-9.8	0.0659129	-9.8	0.607251	-15.9	0.426147	-56.8
-60.2	0.000308359	-60.2	0.184295	-55.7	0.0247867	-55.7	0.0472322	-93.2	6.83526e-05	0.00194049	0.193259	0.860568	-60.1	0.0558662	0.157654	0.601524	-83.3	0.000357687	-65.5	0.00235566	-96.2	0.0254304	-86	0.00101841	-82.2	1.36309e-06	0.00637349	0.00195742	-31.4	0.0022282	0.00101171	0.50473	-51.1	9.30095e-07	-43.8	0.0130108	-70.8	0.00521197	-63.6	0.0698734	-38.3	0.749013	-9.5	0.114465	-9.5	0.60338	-15.5	0.0977058	-56.4
-59.8	0.00063368	-59.8	0.189824	-55.3	0.0398945	-55.3	0.0374007	-92.8	6.34333e-05	0.00027407	0.0506572	0.617037	-59.8	0.0105022	0.178015	0.393058	-83	7.05017e-05	-65.2	0.00429994	-95.8	0.00877433	-85.6	0.000960389	-81.8	1.9584e-08	0.00537946	0.000112593	-31.1	0.000357973	4.52038e-06	0.356293	-50.8	3.65959e-06	-43.5	0.0451972	-70.5	0.0164655	-63.3	0.0740649	-37.9	0.195556	-9.1	0.0953055	-9.1	0.565952	-15.2	0.0138155	-56.1
-59.5	0.000158753	-59.5	0.116618	-54.9	0.135511	-54.9	0.0108179	-92.4	1.40678e-05	0.000179782	0.199542	0.914094	-59.4	0.0499182	0.29217	0.99674	-82.6	1.03979e-05	-64.8	0.00218891	-95.5	0.024017	-85.2	0.000845826	-81.4	2.36498e-05	0.000824991	0.0509707	-30.7	0.000376937	2.08795e-05	0.191652	-50.5	1.58962e-05	-43.2	0.0381968	-70.1	0.00876265	-62.9	0.00061549	-37.5	0.0260393	-8.7	0.0277467	-8.7	0.246612	-14.8	0.0103078	-55.7
-59.1	0.000452598	-59.1	0.135202	-54.5	0.188106	-54.5	0.0132456	-92	7.47417e-06	0.00341753	0.104929	0.931503	-59	0.022838	0.164477	0.459294	-82.2	5.44352e-05	-64.4	8.44699e-05	-95.1	0.0254855	-84.8	0.000549762	-81.1	2.03773e-05	0.00113775	0.0257953	-30.3	0.000586529	3.8187e-06	0.199823	-50.1	1.39978e-05	-42.8	0.0073301	-69.7	0.0959227	-62.5	0.0100323	-37.1	0.0622582	-8.3	0.0358558	-8.3	0.512935	-14.4	0.00485727	-55.3
-58.7	0.000759651	-58.7	0.0502359	-54.2	0.019742	-54.2	0.00102249	-91.7	0.000741294	0.00331692	0.123895	0.716423	-58.6	0.00848653	0.170162	0.489244	-81.8	5.8417e-07	-64	6.28577e-05	-94.7	0.0256222	-84.5	0.00198109	-80.7	4.31048e-06	0.000185395	0.0471412	-29.9	0.00022564	3.08473e-05	0.756467	-49.8	3.95549e-06	-42.5	0.0102654	-69.3	0.0594663	-62.1	0.0355922	-36.7	0.0698726	-8	0.0610028	-8	0.776242	-14	0.0334329	-54.9
-58.3	0.000180272	-58.3	0.00215893	-53.8	0.0901555	-53.8	0.00152054	-91.3	0.00125107	0.0028765	0.0956136	0.487417	-58.2	0.00190197	0.106189	0.185016	-81.4	5.41689e-05	-63.6	0.000227272	-94.3	0.0272874	-84.1	0.00129906	-80.3	9.84211e-05	0.00128409	0.0421652	-29.5	0.000247535	0.00106377	0.33678	-49.5	8.53614e-06	-42.2	0.0294735	-68.9	0.0468203	-61.7	0.0421422	-36.4	0.0162214	-7.6	0.0127156	-7.6	0.79458	-13.6	0.0226497	-54.5
-58	9.83788e-06	-58	0.0375321	-53.4	0.33909	-53.4	0.00216735	-90.9	8.69539e-06	8.66995e-05	0.0426005	0.496876	-57.9	0.032185	0.240907	0.747469	-81.1	5.79629e-06	-63.3	7.87058e-06	-93.9	0.0790036	-83.7	0.00112986	-79.9	0.000279718	0.000925938	0.0638687	-29.2	9.17864e-05	2.97889e-05	0.258106	-49.2	3.89281e-06	-41.8	0.0277786	-68.6	0.00730561	-61.4	0.11172	-36	0.0186593	-7.2	0.00162278	-7.2	0.716148	-13.3	0.107434	-54.2
-57.6	1.88246e-05	-57.6	0.0682768	-53	0.0454859	-53	0.00573123	-90.5	5.32713e-07	8.75387e-05	0.125406	0.413237	-57.5	0.0125085	0.123957	0.485206	-80.7	2.14101e-05	-62.9	7.43166e-06	-93.6	0.0566204	-83.3	0.00422645	-79.5	2.80256e-05	0.0046053	0.00605021	-28.8	7.62171e-05	0.00063596	0.0785953	-48.8	5.40622e-06	-41.5	0.0512677	-68.2	0.00477197	-61	0.555439	-35.6	0.0439727	-6.8	0.00487867	-6.8	0.322736	-12.9	0.0374597	-53.8
-57.2	4.60284e-06	-57.2	0.262127	-52.7	0.0590554	-52.7	0.0212833	-90.2	0.000129007	0.000659514	0.111979	0.557915	-57.1	0.0141243	0.138048	0.152026	-80.3	2.8509e-05	-62.5	0.000466121	-93.2	0.0752848	-83	0.00288907	-79.2	0.00709426	0.000173301	0.765232	-28.4	0.00198091	0.0172676	0.109784	-48.5	5.03062e-05	-41.2	0.0663905	-67.8	0.0026224	-60.6	0.332719	-35.2	0.0236562	-6.4	0.0631772	-6.4	0.0326044	-12.5	0.0823216	-53.4
-56.8	4.53528e-06	-56.8	0.23699	-52.3	0.0567909	-52.3	0.0927684	-89.8	6.03407e-05	0.000563957	0.175576	0.644478	-56.7	0.000998489	0.0705839	0.0267433	-79.9	5.93613e-05	-62.1	2.01693e-06	-92.8	0.104004	-82.6	0.00571152	-78.8	0.00213333	0.0785209	0.267117	-28	0.000521586	2.37962e-05	0.15923	-48.2	5.68018e-05	-40.8	0.0136414	-67.4	0.00561171	-60.2	0.11975	-34.8	0.0300156	-6.1	0.0359766	-6.1	0.0755751	-12.1	0.054582	-53
-56.4	0.000242594	-56.4	0.196302	-51.9	0.137521	-51.9	0.0330023	-89.4	2.46901e-06	0.000105156	0.323156	0.469776	-56.3	0.00337522	0.0315394	0.044175	-79.5	0.000321983	-61.7	7.31551e-07	-92.4	0.142548	-82.2	0.00198024	-78.4	0.00593213	0.0068483	0.201503	-27.7	0.000148863	2.69502e-05	0.155051	-47.8	7.81361e-06	-40.5	0.00971566	-67	0.0154272	-59.8	0.216451	-34.5	0.00659362	-5.7	0.0131701	-5.7	0.00965121	-11.7	0.179611	-52.7
-56.1	0.000969183	-56.1	0.12747	-51.5	0.073455	-51.5	0.0118955	-89	4.80993e-05	0.000177315	0.226054	0.333837	-56	0.00669875	0.037634	0.108737	-79.2	0.000181789	-61.4	0.000306268	-92	0.0800256	-81.8	0.00275906	-78	0.00483494	0.00964015	0.523649	-27.3	6.11981e-06	3.47688e-05	0.137796	-47.5	5.43142e-06	-40.2	0.0229088	-66.7	0.0017306	-59.5	0.0450843	-34.1	0.00107762	-5.3	0.0639152	-5.3	0.0449804	-11.4	0.377701	-52.3
-55.7	0.00119051	-55.7	0.0939792	-51.1	0.069936	-51.1	0.0133983	-88.6	3.57633e-05	9.06953e-05	0.0200405	0.298773	-55.6	0.0209204	0.122593	0.625466	-78.8	1.31423e-05	-61	0.00176328	-91.7	0.164215	-81.4	0.00434465	-77.7	6.73325e-05	0.000375501	0.167808	-26.9	6.87119e-05	0.000269247	0.17342	-47.2	1.88711e-05	-39.9	0.0726867	-66.3	0.00290689	-59.1	0.197528	-33.7	0.00893226	-4.9	0.00821702	-4.9	0.0134728	-11	0.357694	-51.9
-55.3	0.00380914	-55.3	0.183566	-50.8	0.171077	-50.8	0.0205069	-88.3	0.00252589	0.00809395	0.0309442	0.389465	-55.2	0.0172392	0.121431	0.613274	-78.4	5.45283e-06	-60.6	0.00541025	-91.3	0.215626	-81.1	0.00254271	-77.3	3.25687e-05	0.000328266	0.275756	-26.5	0.000298409	0.000783568	0.341997	-46.8	0.000112951	-39.5	0.0698288	-65.9	0.00119326	-58.7	0.466242	-33.3	0.01443	-4.5	0.00902935	-4.5	0.0658574	-10.6	0.112874	-51.5
-54.9	0.00283264	-54.9	0.0793741	-50.4	0.126308	-50.4	0.105699	-87.9	0.00102957	0.00474254	0.00694882	0.462614	-54.8	0.00539529	0.0410636	0.321952	-78	1.01282e-05	-60.2	0.00237992	-90.9	0.118784	-80.7	0.00120749	-76.9	0.000212309	4.1026e-05	0.96191	-26.1	0.000136417	9.57041e-05	0.887846	-46.5	4.23215e-05	-39.2	0.0732796	-65.5	0.0140791	-58.3	0.221212	-33	0.0191055	-4.2	0.0215791	-4.2	0.480704	-10.2	0.0559825	-51.1
-54.5	0.000513753	-54.5	0.0315328	-50	0.0651321	-50	0.009701	-87.5	0.000240092	0.00233741	0.0164883	0.488011	-54.5	0.00868339	0.063877	0.339092	-77.7	4.45155e-05	-59.8	0.0039601	-90.5	0.0874657	-80.3	0.00129064	-76.5	6.17051e-06	0.000184157	0.0251471	-25.8	0.0001179	1.57938e-05	0.572922	-46.2	0.000149275	-38.9	0.048572	-65.2	0.0385286	-58	0.107782	-32.6	0.0111556	-3.8	0.00978579	-3.8	0.403696	-9.8	0.0163821	-50.8
-54.2	0.000122571	-54.2	0.0640065	-49.6	0.0105829	-49.6	0.00760311	-87.1	0.00411709	0.0168316	0.0299272	0.905165	-54.1	0.022873	0.175927	0.799927	-77.3	0.000112397	-59.5	0.00710104	-90.2	0.258155	-79.9	0.000792141	-76.1	6.48782e-06	0.000113155	0.0936346	-25.4	0.000276081	5.16334e-05	0.544669	-45.8	0.000219977	-38.5	0.0610018	-64.8	0.00440589	-57.6	0.0860256	-32.2	0.0100014	-3.4	0.00496084	-3.4	0.0813232	-9.5	0.0210401	-50.4
-53.8	3.61416e-05	-53.8	0.0558119	-49.2	0.0197487	-49.2	0.0216397	-86.7	0.00331562	0.0118114	0.0435176	0.343658	-53.7	0.00578919	0.0613087	0.265377	-76.9	0.000138989	-59.1	0.00543234	-89.8	0.234115	-79.5	0.000617923	-75.8	3.06266e-06	9.55232e-06	0.603162	-25	0.0101643	0.00504191	0.792839	-45.5	5.5874e-05	-38.2	0.0498148	-64.4	0.000840698	-57.2	0.043943	-31.8	0.0311349	-3	0.000653129	-3	0.632337	-9.1	0.0447269	-50
-53.4	0.000147468	-53.4	0.125365	-48.9	0.0741295	-48.9	0.0362861	-86.4	0.0018052	0.00421738	0.150215	0.823422	-53.3	0.00145365	0.0640053	0.129395	-76.5	0.000852831	-58.7	0.0124988	-89.4	0.22715	-79.2	0.00112719	-75.4	4.41012e-05	0.00015874	0.164598	-24.6	0.0435939	0.00711222	0.774499	-45.2	0.000250486	-37.9	0.0265881	-64	0.00125085	-56.8	0.00215527	-31.4	0.00612757	-2.7	0.0106612	-2.7	0.438264	-8.7	0.0046915	-49.6
-53	0.000332719	-53	0.0586672	-48.5	0.0403241	-48.5	0.00547568	-86	0.00261668	0.0032822	0.580811	0.896036	-52.9	0.00105274	0.0300894	0.0909762	-76.1	0.0013119	-58.3	0.01352	-89	0.149592	-78.8	0.00422579	-75	5.02836e-05	0.00144647	0.0330374	-24.2	0.0665001	0.00130766	0.340178	-44.8	0.000182477	-37.5	0.031045	-63.6	0.000871546	-56.4	0.00260946	-31.1	0.0103909	-2.3	0.026524	-2.3	0.312426	-8.3	4.22738e-05	-49.2
-52.7	0.000794262	-52.7	0.0243339	-48.1	0.0191429	-48.1	0.00136748	-85.6	0.000236269	0.000447451	0.485748	0.51656	-52.6	0.00539469	0.112154	0.419058	-75.8	0.00163818	-58	0.0107495	-88.6	0.0359994	-78.4	0.00132094	-74.6	8.88028e-06	0.000841527	0.0078037	-23.9	0.045216	7.50143e-05	0.223564	-44.5	6.2677e-05	-37.2	0.110686	-63.3	0.00969031	-56.1	0.0691235	-30.7	0.0144339	-1.9	0.00893119	-1.9	0.197616	-8	0.000173222	-48.9
-52.3	0.000199935	-52.3	0.0312156	-47.7	0.0501069	-47.7	0.00463697	-85.2	0.000196153	0.000248474	0.489534	0.441089	-52.2	0.00649261	0.0814299	0.310523	-75.4	0.000378395	-57.6	0.0180091	-88.3	0.00602246	-78	0.0106715	-74.2	0.00021995	3.09184e-05	0.227846	-23.5	0.0102601	0.000436034	0.725654	-44.2	0.000153906	-36.9	0.07092	-62.9	0.0291561	-55.7	0.0187644	-30.3	0.00817579	-1.5	0.00251932	-1.5	0.27442	-7.6	0.0150347	-48.5
-51.9	0.00131309	-51.9	0.0297777	-47.3	0.056936	-47.3	0.00972956	-84.8	0.000281633	0.000456209	0.275387	0.345772	-51.8	0.00496323	0.112909	0.740256	-75	8.00835e-05	-57.2	0.0161845	-87.9	0.00678965	-77.7	0.0029051	-73.9	2.14893e-05	0.000234035	0.0189628	-23.1	0.0209045	8.15667e-05	0.762525	-43.8	0.000102242	-36.5	0.129306	-62.5	0.0792237	-55.3	0.0634549	-29.9	0.00535981	-1.1	0.0561505	-1.1	0.141456	-7.2	0.035857	-48.1
-51.5	0.000855326	-51.5	0.0207942	-47	0.14994	-47	0.00486444	-84.5	0.000300418	0.00184492	0.0397208	0.0621603	-51.4	0.00172441	0.0581827	0.537989	-74.6	4.35702e-05	-56.8	0.0156886	-87.5	0.0225278	-77.3	0.000623886	-73.5	1.9096e-05	0.00498474	0.0272654	-22.7	0.0107881	0.000226697	0.985691	-43.5	4.78272e-05	-36.2	0.0720257	-62.1	0.0310151	-54.9	0.125648	-29.5	0.00432316	-0.8	0.125359	-0.8	0.119213	-6.8	0.0770788	-47.7
-51.1	6.29371e-05	-51.1	0.0358946	-46.6	0.0747198	-46.6	0.00544262	-84.1	9.30523e-06	0.000173759	0.0430897	0.043932	-51.1	0.00338485	0.131011	0.791292	-74.2	1.50302e-05	-56.4	0.00786299	-87.1	0.0187183	-76.9	0.000414518	-73.1	0.0003553	0.00171764	0.132581	-22.3	0.0325775	0.00857769	0.760784	-43.2	5.67012e-05	-35.9	0.301894	-61.7	0.0477914	-54.5	0.0833716	-29.2	0.000802166	-0.4	0.0174785	-0.4	0.02332	-6.4	0.177125	-47.3
-50.8	7.59913e-05	-50.8	0.0141322	-46.2	0.0340487	-46.2	0.0226915	-83.7	8.78657e-05	0.0002194	0.149675	0.19062	-50.7	0.00647075	0.109405	0.731942	-73.9	0.000192719	-56.1	0.00475922	-86.7	0.0184917	-76.5	0.00245249	-72.7	0.000412757	0.000538935	0.426828	-22	0.0944825	0.0351681	0.773196	-42.8	9.14724e-05	-35.5	0.280101	-61.4	0.051117	-54.2	0.0521682	-28.8	0.00421407	0	0.00385578	0	0.00629994	-6.1	0.134634	-47
-50.4	6.36239e-05	-50.4	0.0132421	-45.8	0.164343	-45.8	0.0206141	-83.3	0.000117289	0.000195385	0.567795	0.232421	-50.3	0.00272778	0.0514565	0.601662	-73.5	0.000384403	-55.7	0.00396594	-86.4	0.0223202	-76.1	0.0131494	-72.3	1.54964e-05	0.000116071	0.0412598	-21.6	0.00559634	0.00625435	0.663169	-42.5	3.97987e-05	-35.2	0.12012	-61	0.0263206	-53.8	0.0185867	-28.4	0.00874057	0.4	0.0515074	0.4	0.576409	-5.7	0.569214	-46.6
-50	0.000754114	-50	0.0240577	-45.5	0.123598	-45.5	0.00662397	-83	6.40098e-05	0.000370001	0.10038	0.310042	-49.9	0.0045438	0.0369353	0.667312	-73.1	0.000146317	-55.3	0.0119697	-86	0.0328574	-75.8	0.00530956	-72	0.000887069	0.000843077	0.38875	-21.2	0.000132878	0.000848704	0.0812156	-42.2	0.000106984	-34.9	0.0842116	-60.6	0.00294269	-53.4	0.036765	-28	0.00429067	0.8	0.0153002	0.8	0.55298	-5.3	0.200719	-46.2
-49.6	0.00527276	-49.6	0.0540998	-45.1	0.0455371	-45.1	5.22319e-05	-82.6	0.000572791	0.00307488	0.0223324	0.784599	-49.5	0.00503845	0.0365273	0.42381	-72.7	9.65677e-05	-54.9	0.0224784	-85.6	0.0658974	-75.4	0.0108836	-71.6	0.000143696	0.0005754	0.722396	-20.8	2.38454e-05	0.000122863	0.151262	-41.8	0.000119019	-34.5	0.0810995	-60.2	0.0128061	-53	0.0675784	-27.7	0.00194977	1.1	0.0719011	1.1	0.177754	-4.9	0.0203097	-45.8
-49.2	0.000875549	-49.2	0.088403	-44.7	0.0748065	-44.7	7.10307e-05	-82.2	0.00158146	0.00639202	0.172868	0.778087	-49.2	0.00819653	0.0554935	0.323834	-72.3	2.59862e-05	-54.5	0.0299273	-85.2	0.0892012	-75	0.00381098	-71.2	5.92078e-05	0.000278795	0.176	-20.5	3.29413e-08	1.71663e-07	0.0451303	-41.5	0.000219834	-34.2	0.155646	-59.8	0.076781	-52.7	0.173938	-27.3	0.00638823	1.5	0.0167367	1.5	0.146662	-4.5	0.0176653	-45.5
-48.9	0.000269324	-48.9	0.0411993	-44.3	0.0213578	-44.3	0.00686005	-81.8	0.000678558	0.00172688	0.235153	0.432245	-48.8	0.0114543	0.00956906	0.488041	-72	0.000112031	-54.2	0.0355983	-84.8	0.0996652	-74.6	0.0077814	-70.8	2.58612e-05	0.000639092	0.0532608	-20.1	0.000181419	0.000208343	0.338019	-41.2	0.000538564	-33.9	0.208217	-59.5	0.0225369	-52.3	0.0148724	-26.9	0.00581146	1.9	0.0152418	1.9	0.32724	-4.2	0.0244006	-45.1
-48.5	0.000315444	-48.5	0.0329575	-43.9	0.0585713	-43.9	0.00609895	-81.4	8.90846e-05	0.000334836	0.114501	0.204475	-48.4	0.0144869	0.0300777	0.951458	-71.6	8.44208e-05	-53.8	0.0185707	-84.5	0.0925687	-74.2	0.00313402	-70.5	0.000171493	0.000241931	0.679952	-19.7	0.00249772	0.00123405	0.850872	-40.9	0.000135284	-33.5	0.0829986	-59.1	0.000152428	-51.9	0.0102795	-26.5	0.0154673	2.3	3.09449e-05	2.3	0.0273071	-3.8	0.0156615	-44.7
-48.1	0.000714843	-48.1	0.0394708	-43.6	0.0255836	-43.6	0.00731144	-81.1	4.22238e-05	0.000113072	0.106803	0.269758	-48	0.0075459	0.0345267	0.566661	-71.2	0.000325542	-53.4	0.00779737	-84.1	0.156725	-73.9	0.00319337	-70.1	0.0171326	0.0038403	0.901988	-19.3	0.0137235	0.00248154	0.775521	-40.5	0.000312978	-33.2	0.0848849	-58.7	0.0076566	-51.5	0.0205957	-26.1	0.0202934	2.7	0.00636582	2.7	0.314488	-3.4	0.00820636	-44.3
-47.7	0.000599767	-47.7	0.0819328	-43.2	0.0130576	-43.2	0.00781401	-80.7	0.000277795	0.00284828	0.0862415	0.695136	-47.7	0.00525142	0.0405662	0.545152	-70.8	0.00103035	-53	0.00425602	-83.7	0.325906	-73.5	0.00442945	-69.7	0.0041969	0.00185378	0.87594	-18.9	0.00555957	5.17329e-05	0.66172	-40.2	0.00252046	-32.9	0.0783274	-58.3	0.00870207	-51.1	0.0520978	-25.8	0.0214744	3	0.0654228	3	0.591228	-3	0.0263011	-43.9
-47.3	0.000187679	-47.3	0.040957	-42.8	0.0098739	-42.8	0.00633441	-80.3	0.00152654	0.00783149	0.0628141	0.800029	-47.3	0.00159376	0.0269739	0.182937	-70.5	3.76377e-05	-52.7	0.00194896	-83.3	0.208316	-73.1	0.00134956	-69.3	0.00298343	0.00622743	0.326846	-18.6	0.00725329	0.00044852	0.273793	-39.9	0.0047396	-32.5	0.0929296	-58	0.000975175	-50.8	0.121194	-25.4	0.0355301	3.4	0.0111217	3.4	0.0494134	-2.7	0.0984902	-43.6
-47	4.19085e-05	-47	0.0949441	-42.4	0.0923573	-42.4	0.00653518	-79.9	0.000376907	0.0019268	0.0462843	0.253528	-46.9	0.00244619	0.035312	0.465933	-70.1	3.97447e-06	-52.3	0.0012672	-83	0.0562363	-72.7	0.0033209	-68.9	0.00224605	0.00241872	0.559494	-18.2	0.00916157	0.00334683	0.167324	-39.5	0.000798448	-32.2	0.110348	-57.6	0.00199763	-50.4	0.243593	-25	0.00727605	3.8	0.00353329	3.8	0.00125086	-2.3	0.090859	-43.2
-46.6	4.47567e-05	-46.6	0.050369	-42	0.0257663	-42	0.0113799	-79.5	0.00017629	0.000416583	0.132177	0.830571	-46.5	0.00200227	0.0356265	0.308447	-69.7	1.79289e-05	-51.9	0.00164545	-82.6	0.0427304	-72.3	0.0152571	-68.6	0.00020663	0.000122563	0.66835	-17.8	0.00234221	0.00138096	0.675151	-39.2	0.0004203	-31.9	0.0672456	-57.2	0.0027937	-50	0.026196	-24.6	0.000258691	4.2	0.000577512	4.2	0.000128209	-1.9	0.403032	-42.8
-46.2	6.8904e-05	-46.2	0.0805756	-41.7	0.0648668	-41.7	0.0336659	-79.2	0.000104584	0.00211972	0.180073	0.685122	-46.1	0.00136079	0.0272528	0.214642	-69.3	0.000108016	-51.5	0.0108318	-82.2	0.0561967	-72	0.00920941	-68.2	1.36647e-05	3.65335e-05	0.30443	-17.4	9.40729e-05	0.000131656	0.833131	-38.9	0.000322757	-31.6	0.0337626	-56.8	0.00963464	-49.6	0.032647	-24.2	0.000117483	4.5	0.0169606	4.5	0.000419741	-1.5	0.311076	-42.4
-45.8	0.00061873	-45.8	0.233149	-41.3	0.016222	-41.3	0.0118574	-78.8	0.000366975	0.00637284	0.0431585	0.143644	-45.8	0.000605073	0.0135572	0.309872	-68.9	7.45262e-05	-51.1	0.0145463	-81.8	0.0109689	-71.6	0.00966398	-67.8	1.22683e-05	1.73726e-05	0.150499	-17	2.33645e-05	7.65054e-05	0.829765	-38.5	0.0022764	-31.2	0.06751	-56.4	0.0893054	-49.2	0.058201	-23.9	0.000232207	4.9	0.105598	4.9	0.00306501	-1.1	0.0847154	-42
-45.5	0.000741271	-45.5	0.0865863	-40.9	0.00785558	-40.9	0.0214452	-78.4	0.000892723	0.0050061	0.0526129	0.365776	-45.4	0.000452981	0.0100518	0.201576	-68.6	0.00104475	-50.8	0.0114635	-81.4	0.00770353	-71.2	0.00767665	-67.4	0.000669567	1.15295e-05	0.391876	-16.7	0.0123384	0.00233476	0.755562	-38.2	0.00189674	-30.9	0.0850771	-56.1	0.0975855	-48.9	0.0725334	-23.5	0.00110177	5.3	0.0202778	5.3	0.407893	-0.8	0.0160302	-41.7
-45.1	0.000915849	-45.1	0.11454	-40.5	0.0768202	-40.5	0.0146786	-78	0.000165459	0.00229151	0.0607077	0.389805	-45	0.000283152	0.013952	0.149182	-68.2	0.00125754	-50.4	0.0189495	-81.1	0.0390996	-70.8	0.00246918	-67	2.867e-05	1.21047e-05	0.758594	-16.3	0.0274998	0.0114617	0.782221	-37.9	0.000509795	-30.6	0.0836295	-55.7	0.069887	-48.5	0.0866013	-23.1	0.0104396	5.7	0.0106503	5.7	0.479852	-0.4	0.00273508	-41.3
-44.7	0.000686841	-44.7	0.0299262	-40.2	0.0610036	-40.2	0.00140035	-77.7	6.3118e-05	0.00132716	0.0564763	0.680614	-44.6	8.90916e-05	0.00394262	0.0565542	-67.8	0.000123293	-50	0.0123451	-80.7	0.0778187	-70.5	0.00265171	-66.7	0.00255307	0.000266402	0.767478	-15.9	0.0058309	0.00866784	0.63821	-37.5	0.000668226	-30.2	0.0995985	-55.3	0.199002	-48.1	0.0866048	-22.7	0.0179582	6.1	0.0243897	6.1	0.211565	0	0.0180454	-40.9
-44.3	0.000639098	-44.3	0.0892381	-39.8	0.102217	-39.8	0.00191641	-77.3	0.000440507	0.00330882	0.0378454	0.924798	-44.2	0.000823478	0.0104061	0.146882	-67.4	0.000208475	-49.6	0.00372854	-80.3	0.0238625	-70.1	0.0051094	-66.3	0.000158644	0.000100562	0.530626	-15.5	0.00277454	0.00340276	0.516745	-37.2	0.00106284	-29.9	0.0514951	-54.9	0.0357006	-47.7	0.022292	-22.3	0.0303527	6.4	0.00518363	6.4	0.23964	0.4	0.0284776	-40.5
-43.9	0.000628585	-43.9	0.126683	-39.4	0.129134	-39.4	0.00323636	-76.9	0.000208781	0.00851261	0.0114113	0.711395	-43.9	0.000808072	0.0223162	0.676198	-67	1.24982e-05	-49.2	0.000430946	-79.9	0.0111219	-69.7	0.0022847	-65.9	0.000887285	5.49347e-06	0.887845	-15.2	0.0036763	0.0017261	0.873351	-36.9	0.000919397	-29.6	0.0480521	-54.5	0.114396	-47.3	0.0693037	-22	0.00746109	6.8	0.0559415	6.8	0.596795	0.8	0.0778616	-40.2
-43.6	0.000590964	-43.6	0.19746	-39	0.226204	-39	0.00387123	-76.5	0.000226065	0.000981207	0.0140686	0.143783	-43.5	0.00237306	0.0227028	0.561095	-66.7	8.29786e-05	-48.9	0.00102569	-79.5	0.00615427	-69.3	0.00508091	-65.5	0.000252933	5.34333e-05	0.379617	-14.8	0.00223872	0.00367826	0.483942	-36.5	0.000863506	-29.2	0.0864807	-54.2	0.0986577	-47	0.0654551	-21.6	0.00943769	7.2	0.0474743	7.2	0.480382	1.1	0.146538	-39.8
-43.2	0.000556972	-43.2	0.212603	-38.6	0.224591	-38.6	0.0141887	-76.1	9.90197e-05	0.00149874	0.0296977	0.629395	-43.1	0.000172367	0.00448708	0.176088	-66.3	9.45666e-05	-48.5	0.00666217	-79.2	0.0100734	-68.9	0.00164071	-65.2	0.000440566	2.13246e-05	0.479253	-14.4	0.00493398	0.0148843	0.260977	-36.2	0.00163517	-28.9	0.157271	-53.8	0.0189277	-46.6	0.0186471	-21.2	0.0085248	7.6	0.00208308	7.6	0.250693	1.5	0.16082	-39.4
-42.8	0.000269179	-42.8	0.12663	-38.3	0.161108	-38.3	0.00600708	-75.8	8.08361e-09	2.71271e-05	0.0338316	0.55213	-42.7	6.65684e-05	0.00191523	0.0405892	-65.9	8.98152e-06	-48.1	0.00572228	-78.8	0.00891281	-68.6	0.00107993	-64.8	0.00214576	0.000432933	0.677119	-14	0.00436101	0.0182042	0.504534	-35.9	0.00220717	-28.6	0.101243	-53.4	0.0238655	-46.2	0.0644157	-20.8	0.00371888	8	0.0124362	8	0.545603	1.9	0.0672239	-39
-42.4	0.000298258	-42.4	0.194919	-37.9	0.0248414	-37.9	0.00503482	-75.4	1.15147e-05	0.000334397	0.0445323	0.572887	-42.4	0.000699318	0.00203144	0.0676115	-65.5	0.000167217	-47.7	0.00385502	-78.4	0.0140218	-68.2	0.0029091	-64.4	0.00432608	0.000381844	0.478587	-13.6	0.040682	0.0229543	0.591843	-35.5	0.006142	-28.2	0.174403	-53	0.0290059	-45.8	0.0235398	-20.5	0.00293788	8.3	0.016745	8.3	0.593488	2.3	0.0518336	-38.6
-42	2.58181e-05	-42	0.091827	-37.5	0.024199	-37.5	0.0152594	-75	4.99293e-06	0.000539013	0.0167251	0.634787	-42	0.000596966	0.0123371	0.0421669	-65.2	6.66422e-05	-47.3	0.000659276	-78	0.0342681	-67.8	0.00937825	-64	0.00186364	0.00039275	0.255504	-13.3	0.0359926	0.0220729	0.565897	-35.2	0.0205343	-27.9	0.0808297	-52.7	0.12058	-45.5	0.0656272	-20.1	0.00356047	8.7	0.0144224	8.7	0.279562	2.7	0.0221177	-38.3
-41.7	1.86951e-05	-41.7	0.1187	-37.1	0.0143229	-37.1	0.026201	-74.6	2.6978e-05	0.00146313	0.116448	0.402629	-41.6	0.00149659	0.0790399	0.299818	-64.8	3.43126e-06	-47	0.000979728	-77.7	0.0591005	-67.4	0.0222307	-63.6	0.00147355	0.000715862	0.546203	-12.9	0.0480415	0.0370754	0.93039	-34.9	0.0114972	-27.6	0.0892623	-52.3	0.0686082	-45.1	0.0667559	-19.7	0.00811158	9.1	0.0694057	9.1	0.373225	3	0.0390111	-37.9
-41.3	3.38732e-05	-41.3	0.0501032	-36.7	0.0248147	-36.7	0.0054206	-74.2	6.81635e-07	0.000236594	0.099428	0.648403	-41.2	0.000359053	0.0623484	0.125886	-64.4	5.33901e-07	-46.6	0.00172996	-77.3	0.0626258	-67	0.0203755	-63.3	0.00101656	0.00293964	0.299559	-12.5	0.0549941	0.0395964	0.939713	-34.5	0.0316073	-27.2	0.0426795	-51.9	0.00627753	-44.7	0.251846	-19.3	0.000594276	9.5	0.0106804	9.5	0.134737	3.4	0.00903558	-37.5
-40.9	7.55476e-06	-40.9	0.0641597	-36.4	0.0150996	-36.4	0.000133392	-73.9	0.000686809	0.00467427	0.0400246	0.839609	-40.8	7.47063e-05	0.0739799	0.0973447	-64	5.57969e-07	-46.2	0.00533263	-76.9	0.0673624	-66.7	0.00620108	-62.9	0.00406548	0.00287404	0.774426	-12.1	0.0145652	0.0157936	0.677481	-34.2	0.0618769	-26.9	0.0301656	-51.5	0.0375322	-44.3	0.595226	-18.9	0.000618833	9.8	0.00352823	9.8	0.044364	3.8	0.00630404	-37.1
-40.5	1.44645e-05	-40.5	0.0399994	-36	0.0064406	-36	8.34777e-05	-73.5	2.19865e-05	0.000734897	0.108751	0.682762	-40.5	4.83659e-05	0.0272002	0.0548199	-63.6	2.86309e-06	-45.8	0.00584591	-76.5	0.0674237	-66.3	0.00183608	-62.5	0.000509364	0.00445919	0.0775412	-11.7	0.0105342	0.00377808	0.36332	-33.9	0.0787056	-26.6	0.0355863	-51.1	0.0224029	-43.9	0.194396	-18.6	0.000120789	10.2	0.0115408	10.2	0.186981	4.2	0.003456	-36.7
-40.2	0.000488809	-40.2	0.386792	-35.6	0.0166476	-35.6	0.000227959	-73.1	0.000199241	0.00141913	0.0398912	0.405613	-40.1	2.64012e-05	0.00304422	0.00194861	-63.3	4.11971e-07	-45.5	0.00288691	-76.1	0.0346274	-65.9	0.00161099	-62.1	0.000728131	0.00273531	0.194632	-11.4	0.00647336	0.00378082	0.705514	-33.5	0.0526116	-26.2	0.0178275	-50.8	0.0118581	-43.6	0.0823722	-18.2	6.46668e-06	10.6	0.0491083	10.6	0.220603	4.5	0.000459752	-36.4
-39.8	0.000205226	-39.8	0.0773359	-35.2	0.017255	-35.2	0.000729197	-72.7	5.74294e-05	0.000648304	0.0873686	0.384257	-39.7	0.000168521	0.0041703	0.00390116	-62.9	4.53198e-07	-45.1	0.000652133	-75.8	0.0201204	-65.5	0.00303057	-61.7	0.00020023	0.0013373	0.0863409	-11	0.00210479	0.00315915	0.571392	-33.2	0.0328568	-25.9	0.0417276	-50.4	0.0415837	-43.2	0.0584935	-17.8	6.87127e-06	11	0.0225423	11	0.338665	4.9	0.0118381	-36
-39.4	0.000138113	-39.4	0.0672122	-34.8	0.0166004	-34.8	0.00104681	-72.3	1.90918e-05	0.000485596	0.191019	0.27945	-39.3	0.000351299	0.0124607	0.0565291	-62.5	2.83139e-05	-44.7	0.000121031	-75.4	0.0584011	-65.2	0.00835663	-61.4	0.000497231	0.00541379	0.0570616	-10.6	0.0136705	0.0629157	0.380237	-32.9	0.0436091	-25.6	0.268053	-50	0.0171216	-42.8	0.0993024	-17.4	0.000503075	11.4	0.0262972	11.4	0.213946	5.3	0.0587492	-35.6
-39	0.000368647	-39	0.108386	-34.5	0.0504034	-34.5	0.00626223	-72	0.000960671	0.00812119	0.0359398	0.46581	-39	0.000979703	0.00310859	0.051308	-62.1	0.000717311	-44.3	0.000569482	-75	0.0907333	-64.8	0.011302	-61	0.000875103	0.00298464	0.139813	-10.2	0.0219411	0.161608	0.204849	-32.5	0.0188006	-25.2	0.2234	-49.6	0.0169847	-42.4	0.0497464	-17	0.0106396	11.7	0.0292554	11.7	0.0299371	5.7	0.0387965	-35.2
-38.6	0.000261892	-38.6	0.0892722	-34.1	0.0803303	-34.1	0.0106146	-71.6	4.24878e-05	0.00032424	0.221363	0.695683	-38.6	0.00363183	0.0511665	0.171538	-61.7	0.000143674	-43.9	0.00027566	-74.6	0.0922968	-64.4	0.0134858	-60.6	0.000372854	0.00464893	0.115846	-9.8	0.0439245	0.15345	0.445502	-32.2	0.0119101	-24.9	0.282622	-49.2	0.000131414	-42	0.00993007	-16.7	0.027849	12.1	0.0826977	12.1	0.0137008	6.1	0.00628864	-34.8
-38.3	0.000496594	-38.3	0.394712	-33.7	0.129643	-33.7	0.00318926	-71.2	2.63842e-05	0.0016784	0.144905	0.589117	-38.2	0.000270964	0.0186159	0.0307559	-61.4	0.000121413	-43.6	0.00119022	-74.2	0.232313	-64	0.010772	-60.2	0.000238522	0.000933612	0.294371	-9.5	0.0184534	0.0839994	0.446133	-31.9	0.0217997	-24.6	0.304037	-48.9	3.63933e-05	-41.7	0.00385388	-16.3	0.00532823	12.5	0.0402547	12.5	0.0217234	6.4	0.0211875	-34.5
-37.9	0.000281867	-37.9	0.361738	-33.3	0.279227	-33.3	0.000307446	-70.8	5.0424e-05	0.0076752	0.125992	0.359791	-37.8	0.000618881	0.00912689	0.0887148	-61	2.56141e-05	-43.2	0.00480574	-73.9	0.105298	-63.6	0.00392476	-59.8	0.00203772	0.00388431	0.442771	-9.1	0.0826204	0.00861657	0.607807	-31.6	0.0127317	-24.2	0.232497	-48.5	0.00535043	-41.3	0.00271213	-15.9	0.0067877	12.9	0.0186139	12.9	0.0765213	6.8	0.0255451	-34.1
-37.5	3.25646e-05	-37.5	0.271072	-33	0.0385897	-33	0.000111254	-70.5	2.99696e-06	0.00879863	0.0885094	0.320232	-37.4	0.0122293	0.038563	0.303602	-60.6	0.000112438	-42.8	0.00910221	-73.5	0.0643191	-63.3	0.007683	-59.5	0.0018214	0.00452854	0.364285	-8.7	0.0380045	0.000164705	0.225931	-31.2	0.0125926	-23.9	0.0693395	-48.1	0.0122384	-40.9	0.0210368	-15.5	0.00299972	13.3	0.0587851	13.3	0.0536428	7.2	0.0138281	-33.7
-37.1	6.09279e-05	-37.1	0.15718	-32.6	0.0397431	-32.6	0.00108212	-70.1	2.28384e-07	0.00102197	0.0476083	0.831145	-37.1	0.00152163	0.0344357	0.112443	-60.2	0.000325551	-42.4	0.0109289	-73.1	0.0493166	-62.9	0.0163376	-59.1	0.00134705	0.00931144	0.076744	-8.3	0.0187625	0.000159878	0.153147	-30.9	0.0420814	-23.6	0.012828	-47.7	0.00843465	-40.5	0.0377242	-15.2	0.000406063	13.6	0.041683	13.6	0.122159	7.6	0.00643762	-33.3
-36.7	0.000170505	-36.7	0.18741	-32.2	0.0805978	-32.2	0.000669896	-69.7	9.75496e-05	0.00397893	0.106901	0.319838	-36.7	0.00142324	0.0647846	0.0395722	-59.8	0.000476321	-42	0.00970661	-72.7	0.0524819	-62.5	0.0105559	-58.7	0.00152578	0.0124617	0.0633728	-8	0.134427	0.0106538	0.41554	-30.6	0.0634177	-23.2	0.00424985	-47.3	0.0136278	-40.2	0.310826	-14.8	0.000271987	14	0.0266653	14	0.259837	8	0.0305805	-33
-36.4	0.000108708	-36.4	0.309472	-31.8	0.09721	-31.8	0.000625395	-69.3	0.00272719	0.0177071	0.151638	0.231417	-36.3	0.000529278	0.0190734	0.0145798	-59.5	0.000350155	-41.7	0.002376	-72.3	0.0280783	-62.1	0.0138659	-58.3	0.000818891	0.00731749	0.12668	-7.6	0.0262908	0.0466716	0.95114	-30.2	0.219161	-22.9	0.00219974	-47	0.0667933	-39.8	0.391145	-14.4	5.92857e-05	14.4	0.0868534	14.4	0.969289	8.3	0.119626	-32.6
-36	0.000117173	-36	0.551265	-31.4	0.0708107	-31.4	4.75183e-05	-68.9	0.00259991	0.0168362	0.283807	0.460006	-35.9	0.000353839	0.0594319	0.105323	-59.1	4.47711e-05	-41.3	0.00331387	-72	0.0150901	-61.7	0.018896	-58	0.000552763	0.00387726	0.098934	-7.2	0.0626117	0.0210033	0.979817	-29.9	0.502097	-22.6	0.00625672	-46.6	0.0318287	-39.4	0.433063	-14	0.000276253	14.8	0.0807826	14.8	0.855301	8.7	0.221852	-32.2
-35.6	0.00200506	-35.6	0.995221	-31.1	0.0434801	-31.1	0.00374806	-68.6	0.00215091	0.0168351	0.248022	0.625848	-35.5	0.000462014	0.0819023	0.0574354	-58.7	6.42689e-05	-40.9	0.00677199	-71.6	0.0317391	-61.4	0.0191565	-57.6	0.00157473	0.00240393	0.558043	-6.8	0.00816523	0.00381319	0.981735	-29.6	0.555443	-22.3	0.00622861	-46.2	0.0430585	-39	0.157364	-13.6	0.00548566	15.2	0.212494	15.2	0.658999	9.1	0.097834	-31.8
-35.2	0.000118158	-35.2	0.987191	-30.7	0.0510798	-30.7	0.104921	-68.2	8.52253e-05	0.00678379	0.0198797	0.54356	-35.2	4.23564e-05	0.0941388	0.0572852	-58.3	4.76531e-05	-40.5	0.0109392	-71.2	0.041149	-61	0.0238958	-57.2	0.000489288	0.00114022	0.339695	-6.4	0.0116065	0.00818066	0.800262	-29.2	0.535799	-21.9	0.109072	-45.8	0.100869	-38.6	0.0072714	-13.3	0.00896505	15.5	0.116871	15.5	0.217726	9.5	0.100089	-31.4
-34.8	3.8058e-05	-34.8	0.922098	-30.3	0.0497903	-30.3	0.0656854	-67.8	0.00171779	0.0108008	0.0470434	0.953964	-34.8	0.00152896	0.158678	0.133878	-58	3.20633e-05	-40.2	0.015176	-70.8	0.0325388	-60.6	0.00820323	-56.8	0.00024286	0.000657571	0.343685	-6.1	0.0315312	0.0261689	0.734723	-28.9	0.509734	-21.6	0.241565	-45.5	0.00707124	-38.3	4.95531e-05	-12.9	0.0166509	15.9	0.0490676	15.9	0.692537	9.8	0.0847282	-31.1
-34.5	1.83289e-05	-34.5	0.820063	-29.9	0.0224107	-29.9	0.104439	-67.4	0.00214538	0.013435	0.0527131	0.982232	-34.4	0.00229069	0.289381	0.128023	-57.6	6.8318e-05	-39.8	0.0104549	-70.5	0.062161	-60.2	0.0113576	-56.4	8.8888e-05	0.000244361	0.36513	-5.7	0.224561	0.0995573	0.445749	-28.6	0.51109	-21.3	0.150739	-45.1	0.00774176	-37.9	2.59137e-05	-12.5	0.0505204	16.3	0.0236965	16.3	0.710566	10.2	0.0374761	-30.7
-34.1	3.06248e-06	-34.1	0.614201	-29.5	0.0128135	-29.5	0.089645	-67	0.00243447	0.0139296	0.071049	0.86775	-34	0.00235683	0.183449	0.0837117	-57.2	6.31007e-05	-39.4	0.00316901	-70.1	0.0593789	-59.8	0.0169693	-56.1	0.00085847	0.000924946	0.893683	-5.3	0.460351	0.138689	0.266215	-28.2	0.364503	-20.9	0.0489304	-44.7	0.00890679	-37.5	1.36137e-05	-12.1	0.0993801	16.7	0.00403455	16.7	0.457686	10.6	0.038096	-30.3
-33.7	1.97024e-06	-33.7	0.494854	-29.2	0.0177953	-29.2	0.165583	-66.7	0.00305396	0.0152743	0.0734598	0.83634	-33.7	0.00334265	0.0627087	0.0249014	-56.8	0.000209492	-39	0.00086706	-69.7	0.0941477	-59.5	0.0177464	-55.7	0.000361748	0.000836281	0.392958	-4.9	0.413926	0.168947	0.632401	-27.9	0.255572	-20.6	0.0316281	-44.3	0.0060514	-37.1	0.00425986	-11.7	0.0811589	17	0.00677021	17	0.508606	11	0.0316106	-29.9
-33.3	1.60215e-06	-33.3	0.305646	-28.8	0.0216457	-28.8	0.12217	-66.3	0.00337366	0.0194362	0.0753522	0.72579	-33.3	0.0017042	0.253611	0.00308425	-56.4	0.00035251	-38.6	0.000731529	-69.3	0.125836	-59.1	0.0212199	-55.3	0.000818766	0.00380698	0.145082	-4.5	0.0859714	0.0547203	0.819849	-27.6	0.196356	-20.3	0.0722102	-43.9	0.00527167	-36.7	0.00501437	-11.4	0.0409847	17.4	0.0203308	17.4	0.720823	11.4	0.0186106	-29.5
-33	2.48169e-05	-33	0.391577	-28.4	0.0127837	-28.4	0.0436937	-65.9	0.000941074	0.00987073	0.0675324	0.33589	-32.9	0.0102841	0.746373	0.00246735	-56.1	3.31794e-05	-38.3	3.63375e-05	-68.9	0.0644127	-58.7	0.0187478	-54.9	0.000461717	0.000270072	0.292428	-4.2	0.0194226	0.0540225	0.330676	-27.2	0.22908	-19.9	0.18059	-43.6	0.00241864	-36.4	0.0486774	-11	0.0121797	17.8	0.0244043	17.8	0.434414	11.7	0.0050627	-29.2
-32.6	0.000189072	-32.6	0.350662	-28	0.0280538	-28	0.0401974	-65.5	0.0012138	0.0159314	0.0219478	0.632266	-32.5	0.0556623	0.550761	0.00942087	-55.7	7.73717e-07	-37.9	0.00215801	-68.6	0.057148	-58.3	0.0137376	-54.5	0.000184035	2.34443e-06	0.145627	-3.8	0.0371009	0.0318676	0.925363	-26.9	0.366646	-19.6	0.275532	-43.2	0.0025948	-36	0.249468	-10.6	0.0100245	18.2	0.038629	18.2	0.633604	12.1	0.00769141	-28.8
-32.2	0.000191527	-32.2	0.616964	-27.7	0.00769909	-27.7	0.00710555	-65.2	0.000377931	0.0054811	0.0314147	0.626968	-32.1	0.0586672	0.73543	0.0363796	-55.3	1.80272e-05	-37.5	0.000934252	-68.2	0.0166027	-58	0.00586935	-54.2	0.00019723	1.27443e-05	0.723273	-3.4	0.00185494	0.00139274	0.817772	-26.6	0.68117	-19.3	0.53285	-42.8	0.00261617	-35.6	0.228819	-10.2	0.00356235	18.6	0.113137	18.6	0.592583	12.5	0.0109841	-28.4
-31.8	1.78281e-05	-31.8	0.593979	-27.3	0.00213549	-27.3	0.0143387	-64.8	0.00038176	0.0065089	0.0555595	0.884958	-31.8	0.0264875	0.384177	0.019769	-54.9	6.23813e-05	-37.1	0.00401823	-67.8	0.0269792	-57.6	0.00348703	-53.8	0.000138748	4.1126e-07	0.817436	-3	0.0201525	0.00698848	0.669872	-26.2	0.851371	-18.9	0.858892	-42.4	8.90858e-05	-35.2	0.288349	-9.8	0.00379857	18.9	0.235391	18.9	0.594511	12.9	0.0085831	-28
-31.4	7.78364e-06	-31.4	0.557806	-26.9	0.0293908	-26.9	0.023356	-64.4	6.46742e-05	0.00241578	0.0115395	0.641736	-31.4	0.322806	0.632336	0.169009	-54.5	0.00025171	-36.7	0.0013446	-67.4	0.00724222	-57.2	0.0126176	-53.4	9.91919e-07	1.56155e-07	0.539915	-2.7	0.00343936	0.00776216	0.401355	-25.9	0.644236	-18.6	0.874757	-42	0.000293576	-34.8	0.240434	-9.5	0.0026496	19.3	0.116936	19.3	0.0778642	13.3	0.0213055	-27.7
-31.1	4.95465e-05	-31.1	0.627736	-26.5	0.0556435	-26.5	0.0362495	-64	0.000603184	0.00652615	0.0599185	0.774237	-31	0.992123	0.322581	0.427602	-54.2	0.000113843	-36.4	0.000471815	-67	0.0063818	-56.8	0.0103516	-53	1.54662e-05	4.74006e-08	0.838226	-2.3	0.0030739	0.0099034	0.166912	-25.6	0.431398	-18.3	0.75748	-41.7	0.0172542	-34.5	0.0992813	-9.1	0.019834	19.7	0.0279621	19.7	0.029947	13.6	0.0121475	-27.3
-30.7	2.7919e-05	-30.7	0.913856	-26.1	0.107297	-26.1	0.1091	-63.6	4.15934e-05	0.00218423	0.0225102	0.735664	-30.6	0.989569	0.39574	0.269027	-53.8	1.23848e-05	-36	0.00290034	-66.7	0.0150157	-56.4	0.0109934	-52.7	3.49866e-06	2.17182e-06	0.651247	-1.9	0.0586532	0.077442	0.637277	-25.2	0.65814	-17.9	0.700365	-41.3	0.0301276	-34.1	0.0576528	-8.7	0.0126972	20.1	0.0769575	20.1	0.0429301	14	0.0184567	-26.9
-30.3	0.000104927	-30.3	0.68153	-25.8	0.163796	-25.8	0.172774	-63.3	0.000293962	0.00530924	0.160689	0.470859	-30.3	0.994514	0.490515	0.558422	-53.4	3.22848e-06	-35.6	0.0037701	-66.3	0.0280861	-56.1	0.00894651	-52.3	2.40202e-05	5.72085e-05	0.359336	-1.5	0.132147	0.124983	0.947641	-24.9	0.202961	-17.6	0.367996	-40.9	0.0167437	-33.7	0.00301308	-8.3	0.0365507	20.5	0.155228	20.5	0.0653121	14.4	0.0343076	-26.5
-29.9	0.000345649	-29.9	0.992745	-25.4	0.152536	-25.4	0.253454	-62.9	0.000684772	0.0224075	0.154688	0.12769	-29.9	0.848276	0.244849	0.274745	-53	1.67109e-05	-35.2	0.00427268	-65.9	0.0449716	-55.7	0.0105819	-51.9	9.19613e-06	1.77037e-05	0.314063	-1.1	0.0301259	0.0457306	0.692348	-24.6	0.155372	-17.3	0.367703	-40.5	0.0352383	-33.3	0.00206302	-8	0.0100032	20.8	0.0717784	20.8	0.0534853	14.8	0.0198616	-26.1
-29.5	2.38926e-05	-29.5	0.713126	-25	0.0513042	-25	0.438543	-62.5	0.00233931	0.0417565	0.265449	0.376346	-29.5	0.9366	0.39127	0.0956813	-52.7	0.000131042	-34.8	0.00879108	-65.5	0.078039	-55.3	0.0135118	-51.5	4.19964e-05	6.81109e-05	0.296346	-0.8	0.040754	0.0393496	0.995611	-24.2	0.297966	-16.9	0.811661	-40.2	0.0342269	-33	0.00215492	-7.6	0.0066728	21.2	0.00662948	21.2	0.0614584	15.2	0.0526018	-25.8
-29.2	1.38173e-05	-29.2	0.696119	-24.6	0.0466584	-24.6	0.457895	-62.1	0.00036329	0.00754417	0.201227	0.60775	-29.1	0.556352	0.322019	0.175203	-52.3	7.70383e-06	-34.5	0.0158955	-65.2	0.0526721	-54.9	0.00336992	-51.1	0.000157499	3.08373e-05	0.974138	-0.4	0.0244611	0.0171918	0.936519	-23.9	0.45621	-16.6	0.848004	-39.8	0.0729967	-32.6	0.00706046	-7.2	0.00484286	21.6	0.0129496	21.6	0.0302794	15.5	0.0216283	-25.4
-28.8	3.11444e-05	-28.8	0.976222	-24.2	0.0400442	-24.2	0.349061	-61.7	7.96473e-05	0.00993959	0.1781	0.552275	-28.7	0.334224	0.0410113	0.291132	-51.9	4.49943e-07	-34.1	0.0129223	-64.8	0.0390881	-54.5	0.00351484	-50.8	8.1459e-05	4.26048e-06	0.975612	0	0.0104836	0.00975741	0.981236	-23.6	0.247822	-16.3	0.985906	-39.4	0.0658227	-32.2	0.0488412	-6.8	0.00800568	22	0.00088874	22	0.043001	15.9	0.0346297	-25
-28.4	7.63926e-05	-28.4	0.721748	-23.9	0.0658061	-23.9	0.738891	-61.4	0.000265542	0.00854969	0.0532167	0.922038	-28.4	0.451878	0.169307	0.223602	-51.5	3.06018e-07	-33.7	0.014695	-64.4	0.0731335	-54.2	0.00505536	-50.4	6.77096e-05	5.34494e-05	0.495632	0.4	0.00444785	0.00437717	0.98272	-23.2	0.228682	-15.9	0.813985	-39	0.072636	-31.8	0.197298	-6.4	0.029229	22.3	0.0109576	22.3	0.0918021	16.3	0.0864795	-24.6
-28	0.00028836	-28	0.890342	-23.5	0.0903661	-23.5	0.153602	-61	0.000176673	0.0588133	0.0356594	0.700829	-28	0.46337	0.13545	0.606227	-51.1	3.77725e-07	-33.3	0.00592253	-64	0.0427751	-53.8	0.00538548	-50	0.000432492	8.99849e-06	0.717208	0.8	0.00349369	0.00357911	0.86821	-22.9	0.256583	-15.6	0.697342	-38.6	0.0887566	-31.4	0.169956	-6.1	0.0398	22.7	0.0268634	22.7	0.135192	16.7	0.03301	-24.2
-27.7	4.74284e-05	-27.7	0.951592	-23.1	0.0222623	-23.1	0.149506	-60.6	8.58963e-05	0.0426824	0.0347075	0.555853	-27.6	0.240752	0.0355034	0.353769	-50.8	1.73935e-05	-33	0.00469892	-63.6	0.0125003	-53.4	0.00576082	-49.6	0.00130203	4.63934e-05	0.253907	1.1	0.0024147	0.00169645	0.753622	-22.6	0.272647	-15.3	0.759028	-38.3	0.0737929	-31.1	0.0989444	-5.7	0.00310398	23.1	0.0515423	23.1	0.338863	17	0.0560129	-23.9
-27.3	2.80388e-05	-27.3	0.861779	-22.7	0.0103683	-22.7	0.096109	-60.2	6.88131e-05	0.00188721	0.0511174	0.626911	-27.2	0.152765	0.15756	0.129179	-50.4	0.000138037	-32.6	0.00225003	-63.3	0.0205551	-53	0.0110687	-49.2	0.000767361	4.34317e-06	0.422157	1.5	0.0228004	0.0147403	0.603579	-22.3	0.255969	-14.9	0.686812	-37.9	0.0835878	-30.7	0.0555221	-5.3	0.000604039	23.5	0.0416789	23.5	0.869516	17.4	0.164425	-23.5
-26.9	8.82826e-06	-26.9	0.69916	-22.3	0.0282911	-22.3	0.0490162	-59.8	3.45938e-05	0.000701879	0.123986	0.399554	-26.9	0.111365	0.080327	0.65271	-50	0.00043932	-32.2	0.00260033	-62.9	0.00909931	-52.7	0.00853151	-48.9	4.29574e-05	4.12978e-06	0.625641	1.9	0.0170477	0.00635188	0.587581	-21.9	0.182018	-14.6	0.87404	-37.5	0.180635	-30.3	0.088037	-4.9	0.000760012	23.9	0.0385027	23.9	0.950651	17.8	0.166229	-23.1
-26.5	1.19454e-06	-26.5	0.356374	-22	0.110782	-22	0.0465771	-59.5	0.00122949	0.0137788	0.0532353	0.356151	-26.5	0.20952	0.173084	0.550351	-49.6	0.000589784	-31.8	0.000816369	-62.5	0.00660229	-52.3	0.00607543	-48.5	0.000383436	1.61425e-05	0.750228	2.3	0.00145951	0.00861644	0.2202	-21.6	0.181627	-14.3	0.927081	-37.1	0.0366412	-29.9	0.17422	-4.5	0.00376709	24.2	0.0563553	24.2	0.795071	18.2	0.148534	-22.7
-26.1	9.1682e-07	-26.1	0.15199	-21.6	0.173545	-21.6	0.0581027	-59.1	0.000324092	0.00258217	0.132621	0.48597	-26.1	0.0557383	0.172958	0.67864	-49.2	3.2401e-05	-31.4	0.000399693	-62.1	0.00381442	-51.9	0.00531074	-48.1	0.000185213	7.33837e-06	0.315901	2.7	0.000193522	0.000120002	0.731306	-21.3	0.227407	-13.9	0.853711	-36.7	0.0321944	-29.5	0.0206905	-4.2	0.0358699	24.6	0.0429965	24.6	0.467854	18.6	0.0527834	-22.3
-25.8	2.33307e-07	-25.8	0.128649	-21.2	0.13233	-21.2	0.0677591	-58.7	0.000769967	0.0034073	0.259144	0.465577	-25.7	0.0961452	0.057486	0.505689	-48.9	2.30519e-06	-31.1	0.000681002	-61.7	0.00839023	-51.5	0.00514113	-47.7	0.000208222	1.4512e-05	0.743673	3	0.000833033	0.000712084	0.873578	-20.9	0.135273	-13.6	0.99076	-36.4	0.0342215	-29.2	0.000655742	-3.8	0.0339971	25	0.00263232	25	0.180412	18.9	0.058562	-22
-25.4	1.7961e-06	-25.4	0.117323	-20.8	0.0750608	-20.8	0.111713	-58.3	0.000676049	0.00669716	0.0210247	0.415175	-25.3	0.0136333	0.0151754	0.686126	-48.5	1.04517e-05	-30.7	0.000204703	-61.4	0.0090325	-51.1	0.010158	-47.3	0.000508752	9.81431e-05	0.774066	3.4	0.0122764	0.00784106	0.621587	-20.6	0.0803139	-13.3	0.726903	-36	0.0124249	-28.8	0.000754942	-3.4	0.0792317	25.4	0.00145316	25.4	0.0491053	19.3	0.164872	-21.6
-25	1.18439e-05	-25	0.175877	-20.5	0.0484165	-20.5	0.153223	-58	3.53402e-06	0.000248237	0.0984801	0.40106	-25	0.00212443	0.0137414	0.302382	-48.1	9.92899e-06	-30.3	0.00148765	-61	0.0650338	-50.8	0.00840389	-47	0.00316367	0.000230359	0.38901	3.8	0.0129511	0.0100777	0.993048	-20.3	0.0387796	-13	0.914205	-35.6	0.00614569	-28.4	0.00117298	-3	0.124018	25.8	0.0152765	25.8	0.0551907	19.7	0.192229	-21.2
-24.6	3.92933e-06	-24.6	0.0838471	-20.1	0.0557425	-20.1	0.289653	-57.6	3.04877e-06	0.0012031	0.0127154	0.258132	-24.6	0.00132324	0.000427458	0.128249	-47.7	3.70675e-06	-29.9	0.000960214	-60.6	0.0359835	-50.4	0.0171398	-46.6	0.00167425	0.000121111	0.693712	4.2	0.0028412	0.00909152	0.407308	-19.9	0.00978411	-12.6	0.875856	-35.2	0.0100466	-28	0.00232646	-2.7	0.113449	26.1	0.00876864	26.1	0.0484515	20.1	0.259481	-20.8
-24.2	2.39015e-07	-24.2	0.0798273	-19.7	0.0538678	-19.7	0.372673	-57.2	5.65882e-07	0.000228883	0.0437691	0.233507	-24.2	0.000435661	0.000776825	0.255192	-47.3	2.21166e-06	-29.5	0.000547898	-60.2	0.0251487	-50	0.0086893	-46.2	0.00164578	0.00067431	0.86052	4.5	0.000991127	0.00155295	0.620831	-19.6	0.00528156	-12.3	0.375998	-34.8	0.00531422	-27.7	0.00820027	-2.3	0.10049	26.5	0.00444595	26.5	0.01956	20.5	0.264338	-20.5
-23.9	4.85961e-06	-23.9	0.192577	-19.3	0.0244715	-19.3	0.715767	-56.8	0.000225056	0.000184482	0.493393	0.712146	-23.8	0.000695203	0.000886429	0.450179	-47	1.42829e-05	-29.2	4.28766e-05	-59.8	0.0233987	-49.6	0.00644815	-45.8	0.000115475	4.79822e-06	0.851417	4.9	0.0106839	0.00935361	0.93478	-19.3	0.010683	-12	0.279484	-34.5	0.000289384	-27.3	0.0161821	-1.9	0.0221607	26.9	0.00996936	26.9	0.0617309	20.8	0.220339	-20.1
-23.5	3.51779e-06	-23.5	0.106249	-18.9	0.00323457	-18.9	0.716557	-56.4	0.000133314	0.000438303	0.337403	0.482918	-23.4	0.00017678	0.00261436	0.276102	-46.6	3.09428e-07	-28.8	0.000273147	-59.5	0.0218662	-49.2	0.00761064	-45.5	0.000272498	5.61615e-06	0.875256	5.3	0.019133	0.00913159	0.609937	-18.9	0.0109665	-11.6	0.435741	-34.1	0.0019519	-26.9	0.00198561	-1.5	0.00218411	27.3	0.0356002	27.3	0.0827679	21.2	0.166468	-19.7
-23.1	2.30847e-06	-23.1	0.0949958	-18.6	0.00946756	-18.6	0.390973	-56.1	0.000131426	0.000527555	0.33115	0.445812	-23.1	0.00291249	0.00382145	0.70961	-46.2	4.03312e-05	-28.4	0.000854413	-59.1	0.0118526	-48.9	0.00468985	-45.1	0.00237724	6.38041e-08	0.467889	5.7	0.0214068	0.00728242	0.499537	-18.6	0.0762549	-11.3	0.517339	-33.7	0.00217277	-26.5	0.0286618	-1.1	0.00127837	27.7	0.205463	27.7	0.422683	21.6	0.118276	-19.3
-22.7	6.82178e-07	-22.7	0.0980031	-18.2	0.0365112	-18.2	0.313461	-55.7	0.000396123	0.0050563	0.0473067	0.131334	-22.7	0.00596032	0.00423142	0.972995	-45.8	0.00140743	-28	0.00287923	-58.7	0.017727	-48.5	0.00695924	-44.7	0.000939364	5.71633e-06	0.694057	6.1	0.0293565	0.0183939	0.785891	-18.3	0.0797343	-11	0.594826	-33.3	0.000848982	-26.1	0.00723132	-0.8	0.00599584	28	0.519953	28	0.543005	22	0.0138774	-18.9
-22.3	4.04334e-07	-22.3	0.15309	-17.8	0.0405112	-17.8	0.279271	-55.3	0.000205062	0.00305607	0.0547941	0.0248726	-22.3	0.00873758	0.00302589	0.898731	-45.5	0.00058615	-27.7	0.00366771	-58.3	0.0131893	-48.1	0.0081991	-44.3	4.31916e-05	2.31474e-06	0.787718	6.4	0.0287034	0.0161348	0.500267	-17.9	0.0533163	-10.6	0.629533	-33	0.0138228	-25.8	0.0143306	-0.4	0.0143256	28.4	0.805982	28.4	0.455427	22.3	0.00893172	-18.6
-22	6.79284e-06	-22	0.348746	-17.4	0.0188173	-17.4	0.207718	-54.9	0.000119464	0.0037583	0.192113	0.0957591	-21.9	0.010945	0.00178393	0.99413	-45.1	0.000334382	-27.3	0.00314394	-58	0.0195796	-47.7	0.0142491	-43.9	0.000332287	1.68798e-05	0.61823	6.8	0.00147425	0.0003886	0.175276	-17.6	0.0940458	-10.3	0.977143	-32.6	0.0569136	-25.4	0.0372393	0	0.00259194	28.8	0.284857	28.8	0.536805	22.7	0.0678041	-18.2
-21.6	4.31674e-06	-21.6	0.522268	-17	0.0107667	-17	0.173035	-54.5	8.47986e-05	0.00990007	0.0407085	0.33204	-21.6	0.0145956	0.00339866	0.717012	-44.7	0.000725097	-26.9	0.00868727	-57.6	0.0237392	-47.3	0.0126606	-43.6	0.000106559	7.7203e-06	0.201329	7.2	1.85262e-05	2.40657e-05	0.520545	-17.3	0.124486	-10	0.801228	-32.2	0.0950734	-25	0.0695847	0.4	0.00320825	29.2	0.196237	29.2	0.132681	23.1	0.517876	-17.8
-21.2	1.47348e-05	-21.2	0.319661	-16.7	0.0269929	-16.7	0.212428	-54.2	0.000206455	0.00265503	0.0995084	0.808909	-21.2	0.00707505	0.00258891	0.519689	-44.3	0.000585067	-26.5	0.00488126	-57.2	0.0117899	-47	0.0102676	-43.2	3.85921e-05	5.93313e-06	0.281831	7.6	3.31805e-05	4.47676e-05	0.184149	-16.9	0.09132	-9.6	0.693743	-31.8	0.0923736	-24.6	0.14239	0.8	0.0465405	29.5	0.0912465	29.5	0.294236	23.5	0.364015	-17.4
-20.8	1.64161e-05	-20.8	0.254375	-16.3	0.013183	-16.3	0.127809	-53.8	0.000162364	0.00248998	0.0447801	0.865382	-20.8	0.0101718	0.00303594	0.970675	-43.9	0.000516587	-26.1	0.00208745	-56.8	0.024171	-46.6	0.027543	-42.8	0.000129022	0.000108934	0.26284	8	4.19237e-05	8.45391e-05	0.280769	-16.6	0.041079	-9.3	0.668791	-31.4	0.139223	-24.2	0.138399	1.1	0.0245723	29.9	0.0275111	29.9	0.510625	23.9	0.455649	-17
-20.5	2.34933e-05	-20.5	0.0662719	-15.9	0.0171148	-15.9	0.0359496	-53.4	2.41523e-05	0.00030428	0.0453753	0.130363	-20.4	0.00379328	0.00153812	0.62514	-43.6	4.69715e-05	-25.8	0.00070272	-56.4	0.110593	-46.2	0.0433649	-42.4	4.38803e-05	2.31839e-05	0.545526	8.3	7.90025e-05	0.000149143	0.651691	-16.3	0.0163041	-9	0.856232	-31.1	0.0806675	-23.9	0.0154221	1.5	0.0182042	30.3	0.0722081	30.3	0.774375	24.2	0.363925	-16.7
-20.1	6.7514e-05	-20.1	0.0379542	-15.5	0.0662973	-15.5	0.141019	-53	5.0935e-06	1.77759e-05	0.131696	0.0570293	-20	0.00646152	0.00139902	0.714958	-43.2	1.23686e-05	-25.4	0.00028413	-56.1	0.094726	-45.8	0.0153654	-42	1.63589e-05	0.00036382	0.849582	8.7	4.65833e-05	3.65023e-05	0.560082	-15.9	0.0236154	-8.6	0.334472	-30.7	0.0973813	-23.5	1.46564e-05	1.9	0.00283277	30.7	0.02643	30.7	0.909559	24.6	0.243303	-16.3
-19.7	0.000222796	-19.7	0.013052	-15.2	0.165082	-15.2	0.174025	-52.7	7.42956e-05	0.000436287	0.049743	0.963078	-19.7	0.00634576	0.00196146	0.897004	-42.8	8.48949e-05	-25	0.000747589	-55.7	0.0767632	-45.5	0.0107255	-41.7	2.48114e-05	1.79866e-05	0.789492	9.1	0.000879483	0.000872768	0.772666	-15.6	0.0119884	-8.3	0.385598	-30.3	0.162499	-23.1	0.00537625	2.3	0.000119323	31.1	0.0563067	31.1	0.535781	25	0.368757	-15.9
-19.3	0.000117381	-19.3	0.00716645	-14.8	0.0176764	-14.8	0.250577	-52.3	4.93482e-05	0.00115422	0.0629587	0.396321	-19.3	0.00230989	0.000938066	0.51721	-42.4	0.000170137	-24.6	0.000221064	-55.3	0.17178	-45.1	0.0102722	-41.3	2.16471e-05	6.03569e-06	0.781776	9.5	0.00110595	0.000541678	0.951423	-15.3	0.0088582	-8	0.295983	-29.9	0.0823012	-22.7	0.0109405	2.7	0.000626675	31.4	0.0577819	31.4	0.390159	25.4	0.163197	-15.5
-18.9	5.43622e-05	-18.9	0.00727113	-14.4	0.00861868	-14.4	0.301488	-51.9	0.000226084	0.00107952	0.0359916	0.988488	-18.9	0.000869627	0.000273905	0.165516	-42	0.000262442	-24.2	1.15163e-05	-54.9	0.21234	-44.7	0.00227318	-40.9	0.000274038	3.65141e-06	0.611457	9.8	9.58621e-05	0.000157478	0.400569	-14.9	0.00222685	-7.6	0.230588	-29.5	0.0843364	-22.3	0.0322455	3	0.00885931	31.8	0.127911	31.8	0.166454	25.8	0.122532	-15.2
-18.6	4.63033e-06	-18.6	0.037835	-14	0.0192114	-14	0.74289	-51.5	2.17468e-05	0.00014181	0.198718	0.913402	-18.5	0.000781784	0.000809761	0.275472	-41.7	4.48376e-05	-23.9	0.00133669	-54.5	0.208631	-44.3	0.00976211	-40.5	3.7578e-05	3.40521e-06	0.478728	10.2	1.00633e-05	2.78369e-05	0.186614	-14.6	0.0027048	-7.3	0.208456	-29.2	0.0173096	-22	0.0484107	3.4	0.0206182	32.2	0.261125	32.2	0.167416	26.1	0.130833	-14.8
-18.2	3.0627e-07	-18.2	0.0283296	-13.6	0.00512535	-13.6	0.421665	-51.1	3.14295e-06	2.04165e-05	0.239592	0.74454	-18.2	0.00754879	0.00173355	0.27938	-41.3	4.79931e-06	-23.5	0.00379151	-54.2	0.29267	-43.9	0.0228257	-40.2	1.14867e-05	3.10395e-07	0.0578213	10.6	0.000443149	0.00117714	0.236155	-14.3	0.00132156	-7	0.196865	-28.8	0.00709847	-21.6	0.00810954	3.8	0.000409859	32.6	0.187307	32.6	0.310115	26.5	0.175591	-14.4
-17.8	1.21881e-07	-17.8	0.0239169	-13.3	0.0107418	-13.3	0.789563	-50.8	0.000113605	0.000712258	0.12312	0.794467	-17.8	0.00799041	0.00102316	0.874372	-40.9	1.17962e-05	-23.1	0.0152662	-53.8	0.224939	-43.6	0.0171047	-39.8	0.00263303	5.21018e-06	0.269855	11	0.00150079	0.00246355	0.509074	-13.9	0.00231609	-6.6	0.272664	-28.4	0.0405584	-21.2	0.00450446	4.2	0.000120545	33	0.0844233	33	0.475105	26.9	0.23803	-14
-17.4	8.29612e-05	-17.4	0.00525505	-12.9	0.0391204	-12.9	0.850558	-50.4	0.000327602	0.00276928	0.0689606	0.880922	-17.4	0.0280533	0.00284638	0.524147	-40.5	5.44507e-06	-22.7	0.0169223	-53.4	0.190403	-43.2	0.0368831	-39.4	0.00178116	6.99084e-06	0.653903	11.4	0.00193154	0.00561265	0.230988	-13.6	0.00743172	-6.3	0.518806	-28	0.0499753	-20.8	0.000259437	4.5	0.000323556	33.3	0.17904	33.3	0.314656	27.3	0.170206	-13.6
-17	4.27568e-05	-17	0.0816862	-12.5	0.0524648	-12.5	0.825559	-50	1.36769e-06	6.24337e-05	0.0896887	0.575912	-17	0.0154489	0.00848103	0.795283	-40.2	9.73412e-05	-22.3	0.0128958	-53	0.131836	-42.8	0.0304329	-39	0.0100974	1.83392e-05	0.243899	11.7	0.00984918	0.010749	0.899325	-13.3	0.00249025	-6	0.227871	-27.7	0.00527859	-20.5	0.00957967	4.9	0.0107336	33.7	0.186956	33.7	0.642748	27.7	0.110257	-13.3
-16.7	4.63093e-06	-16.7	0.079071	-12.1	0.019869	-12.1	0.846063	-49.6	7.195e-05	0.000530615	0.216099	0.949285	-16.6	0.00989012	0.00699636	0.54223	-39.8	0.000285458	-22	0.0157196	-52.7	0.136083	-42.4	0.0508926	-38.6	0.0619884	0.00180341	0.535898	12.1	0.00822573	0.00165686	0.260824	-13	0.000763809	-5.6	0.357955	-27.3	0.00789838	-20.1	0.0328303	5.3	0.0139361	34.1	0.351626	34.1	0.453434	28	0.0564011	-12.9
-16.3	2.74683e-06	-16.3	0.0190517	-11.7	0.0542762	-11.7	0.57889	-49.2	7.80173e-05	0.00110216	0.0674746	0.309446	-16.3	0.0017863	0.00178231	0.255454	-39.4	0.000159345	-21.6	0.0116681	-52.3	0.131351	-42	0.069364	-38.3	0.16495	0.000311389	0.214488	12.5	0.000286745	0.000136629	0.777998	-12.6	0.000564451	-5.3	0.326315	-26.9	0.00165718	-19.7	0.0563089	5.7	0.0202654	34.5	0.185209	34.5	0.730648	28.4	0.30347	-12.5
-15.9	8.93984e-06	-15.9	0.0490136	-11.4	0.134788	-11.4	0.179358	-48.9	0.000108787	0.000607378	0.14406	0.188155	-15.9	0.00173972	0.00041201	0.514256	-39	6.5144e-05	-21.2	0.00505685	-51.9	0.364251	-41.7	0.088206	-37.9	0.215663	0.00593617	0.212678	12.9	0.000213832	0.000209997	0.935341	-12.3	0.011915	-5	0.126078	-26.5	0.000103442	-19.3	0.125902	6.1	0.0674803	34.8	0.580946	34.8	0.958575	28.8	0.63521	-12.1
-15.5	0.000191341	-15.5	0.0903298	-11	0.0689724	-11	0.0978478	-48.5	0.000100142	0.00100138	0.149408	0.287251	-15.5	0.000706746	0.00285712	0.255624	-38.6	3.38874e-05	-20.8	0.00135728	-51.5	0.246062	-41.3	0.0450602	-37.5	0.273657	0.00998624	0.103042	13.3	0.000147898	0.00037931	0.322224	-12	0.0159634	-4.7	0.125926	-26.1	4.60287e-05	-18.9	0.114865	6.4	0.0350982	35.2	0.818697	35.2	0.0885912	29.2	0.711682	-11.7
-15.2	0.000273023	-15.2	0.333458	-10.6	0.1638	-10.6	0.265278	-48.1	0.000168592	0.011487	0.228429	0.511539	-15.1	0.000333955	0.000644178	0.391414	-38.3	0.000192019	-20.5	0.000976977	-51.1	0.394301	-40.9	0.0645049	-37.1	0.184143	0.00546937	0.0954568	13.6	0.00383594	0.00337665	0.975674	-11.6	0.006804	-4.3	0.127679	-25.8	0.0016036	-18.6	0.315586	6.8	0.0300994	35.6	0.78481	35.6	0.0413863	29.5	0.357942	-11.4
-14.8	0.000104195	-14.8	0.301224	-10.2	0.180546	-10.2	0.472624	-47.7	0.000395988	0.00445719	0.194317	0.915511	-14.7	0.000838266	0.000701767	0.811536	-37.9	0.000356249	-20.1	4.34658e-05	-50.8	0.523139	-40.5	0.0609788	-36.7	0.955543	0.0190997	0.0175882	14	0.00479983	0.00949596	0.387398	-11.3	0.0144704	-4	0.042063	-25.4	0.00225101	-18.2	0.0221816	7.2	0.0401268	36	0.657624	36	0.506705	29.9	0.443582	-11
-14.4	1.39813e-05	-14.4	0.212496	-9.8	0.12963	-9.8	0.605788	-47.3	4.24484e-06	0.000108403	0.0755629	0.25598	-14.4	0.000718176	0.000266288	0.539585	-37.5	3.35614e-05	-19.7	8.82201e-05	-50.4	0.441151	-40.2	0.0341874	-36.4	0.764483	0.0189824	0.0388912	14.4	0.0123888	0.0111068	0.905665	-11	0.00903975	-3.7	0.0437586	-25	0.000994491	-17.8	0.0415876	7.6	0.0220316	36.4	0.280329	36.4	0.419236	30.3	0.215	-10.6
-14	2.15751e-05	-14	0.100572	-9.5	0.0247233	-9.5	0.989559	-47	2.69699e-05	0.000695922	0.134763	0.65626	-14	0.0123098	0.0022923	0.460486	-37.1	0.000267151	-19.3	6.45251e-05	-50	0.604733	-39.8	0.054919	-36	0.505644	0.0136791	0.0645102	14.8	0.0107453	0.0202249	0.485627	-10.6	0.00384607	-3.3	0.04657	-24.6	0.00146624	-17.4	0.102893	8	0.0118316	36.7	0.247413	36.7	0.262905	30.7	0.0211062	-10.2
-13.6	1.5803e-05	-13.6	0.187489	-9.1	0.0553369	-9.1	0.503849	-46.6	8.91997e-05	0.002295	0.0357501	0.895336	-13.6	0.00963645	0.00334581	0.205311	-36.7	0.000271415	-18.9	0.00118845	-49.6	0.729574	-39.4	0.0420218	-35.6	0.611392	0.0956341	0.280507	15.2	0.0418793	0.0462365	0.848547	-10.3	0.000511659	-3	0.0323823	-24.2	0.00215771	-17	0.0595113	8.3	0.00592102	37.1	0.473867	37.1	0.297258	31.1	0.0331156	-9.8
-13.3	2.24985e-06	-13.3	0.169258	-8.7	0.0243821	-8.7	0.595546	-46.2	0.000406791	0.00309129	0.108738	0.963315	-13.2	0.00969884	0.0108361	0.246344	-36.4	1.10232e-05	-18.6	0.000955604	-49.2	0.646043	-39	0.0313758	-35.2	0.594109	0.107205	0.196104	15.5	0.010228	0.00936876	0.880381	-10	0.000273083	-2.7	0.0238741	-23.9	0.000633386	-16.7	0.0711555	8.7	0.0254003	37.5	0.466252	37.5	0.132662	31.4	0.0476592	-9.5
-12.9	1.31163e-07	-12.9	0.151557	-8.3	0.0148444	-8.3	0.891833	-45.8	8.58853e-05	0.000838007	0.0493759	0.866844	-12.9	0.0133941	0.0143078	0.366984	-36	4.53527e-06	-18.2	0.000303967	-48.9	0.531912	-38.6	0.0139137	-34.8	0.543076	0.054016	0.202097	15.9	0.0013645	0.000742116	0.822718	-9.6	0.000127771	-2.3	0.0141498	-23.5	0.000125663	-16.3	0.0876982	9.1	0.0546431	37.9	0.645737	37.9	0.0605767	31.8	0.0203522	-9.1
-12.5	1.47561e-06	-12.5	0.0292207	-8	0.0143591	-8	0.666261	-45.5	0.000471441	0.00186107	0.23807	0.78313	-12.5	0.012023	0.0250486	0.827991	-35.6	8.00395e-06	-17.8	0.000457581	-48.5	0.722574	-38.3	0.00722229	-34.5	0.88219	0.0463524	0.15459	16.3	0.0006928	0.00241446	0.222694	-9.3	1.94967e-05	-2	0.0456378	-23.1	0.000799172	-15.9	0.128258	9.5	0.108367	38.3	0.350107	38.3	0.200179	32.2	0.0295105	-8.7
-12.1	6.89977e-05	-12.1	0.0423334	-7.6	0.0160719	-7.6	0.586333	-45.1	0.000172198	0.000272177	0.75217	0.377524	-12.1	0.0123481	0.0433519	0.694053	-35.2	1.35066e-05	-17.4	0.000574652	-48.1	0.421177	-37.9	0.00693314	-34.1	0.800542	0.183195	0.344465	16.7	0.0010751	0.00472764	0.145725	-9	2.72289e-05	-1.7	0.0542217	-22.7	0.00704446	-15.5	0.185279	9.8	0.134207	38.6	0.354136	38.6	0.0135169	32.6	0.0150213	-8.3
-11.7	0.000594257	-11.7	0.019816	-7.2	0.024154	-7.2	0.947532	-44.7	0.000377684	0.000477984	0.652093	0.170108	-11.7	0.0088028	0.0140989	0.331658	-34.8	2.83251e-06	-17	0.00413477	-47.7	0.563528	-37.5	0.00358775	-33.7	0.508803	0.156496	0.467692	17	0.00219232	0.00976287	0.0456547	-8.6	0.000110994	-1.3	0.171495	-22.3	0.0154657	-15.2	0.0413845	10.2	0.182572	39	0.334843	39	0.0117653	33	0.00933996	-8
-11.4	0.000210623	-11.4	0.0380506	-6.8	0.136137	-6.8	0.876848	-44.3	0.000515504	0.00153851	0.667998	0.30708	-11.3	0.00649499	0.00733068	0.425608	-34.5	4.35528e-05	-16.7	0.00877729	-47.3	0.816598	-37.1	0.0093921	-33.3	0.085142	0.1236	0.712151	17.4	0.00173071	0.00687636	0.177996	-8.3	0.000161491	-1	0.3004	-22	0.00631765	-14.8	0.0113622	10.6	0.229666	39.4	0.370595	39.4	0.0207541	33.3	0.0566379	-7.6
-11	1.61325e-05	-11	0.016052	-6.4	0.256002	-6.4	0.226509	-43.9	0.00251319	0.00501967	0.663352	0.511919	-11	0.00495518	0.002408	0.480136	-34.1	7.98939e-05	-16.3	0.0121285	-47	0.79298	-36.7	0.016306	-33	0.129884	0.202903	0.913591	17.8	0.00768904	0.0105205	0.659923	-8	0.000860326	-0.7	0.204806	-21.6	0.0182912	-14.4	0.0258026	11	0.312589	39.8	0.502658	39.8	0.17574	33.7	0.488308	-7.2
-10.6	3.20064e-05	-10.6	0.0152057	-6.1	0.6885	-6.1	0.634068	-43.6	0.00377231	0.019265	0.325851	0.0900996	-10.6	0.0126938	0.00853788	0.58806	-33.7	0.00020796	-15.9	0.0105548	-46.6	0.866317	-36.4	0.00903267	-32.6	0.123165	0.547242	0.461488	18.2	0.00420921	0.00795609	0.426239	-7.6	0.000354593	-0.3	0.181227	-21.2	0.0381042	-14	0.0957843	11.4	0.135828	40.2	0.0282597	40.2	0.292843	34.1	0.446989	-6.8
-10.2	1.44539e-05	-10.2	0.0134867	-5.7	0.25185	-5.7	0.587332	-43.2	0.00195613	0.00616839	0.486437	0.0485079	-10.2	0.00673084	0.0186763	0.496739	-33.3	0.000324135	-15.5	0.00924378	-46.2	0.421101	-36	0.00932976	-32.2	0.152175	0.883403	0.162882	18.6	0.00137929	0.00253349	0.511286	-7.3	0.00011967	0	0.112589	-20.8	0.00829574	-13.6	0.0299469	11.7	0.0268527	40.5	0.206544	40.5	0.423364	34.5	0.408927	-6.4
-9.8	4.8077e-05	-9.8	0.00208812	-5.3	0.267297	-5.3	0.577869	-42.8	0.000778885	0.0121123	0.308073	0.0856453	-9.8	0.00380954	0.0159161	0.676708	-33	0.000589692	-15.2	0.0101059	-45.8	0.324047	-35.6	0.0112591	-31.8	0.309043	0.544319	0.673512	18.9	0.00129978	0.000636373	0.298632	-7	0.000710412	0.3	0.0738427	-20.5	0.032071	-13.3	0.00161287	12.1	0.0313619	40.9	0.253692	40.9	0.0560931	34.8	0.325603	-6.1
-9.5	2.38554e-05	-9.5	0.00228345	-4.9	0.186135	-4.9	0.709279	-42.4	0.000422592	0.00633393	0.19313	0.0769562	-9.5	0.00118735	0.00702696	0.77086	-32.6	0.000473335	-14.8	0.00395567	-45.5	0.542623	-35.2	0.0163845	-31.4	0.228882	0.620472	0.4682	19.3	0.00310413	0.00183191	0.330772	-6.6	0.00024434	0.7	0.065722	-20.1	0.0246615	-12.9	0.00216085	12.5	0.0420216	41.3	0.866466	41.3	0.357899	35.2	0.857684	-5.7
-9.1	3.09746e-05	-9.1	0.00919299	-4.5	0.0400011	-4.5	0.754538	-42	0.000663266	0.0372455	0.15501	0.0163799	-9.1	0.000418115	0.00361803	0.912284	-32.2	0.000196387	-14.4	0.00312494	-45.1	0.67731	-34.8	0.0122612	-31.1	0.447447	0.760478	0.290437	19.7	0.00460201	0.00594302	0.774902	-6.3	0.000199149	1	0.0564981	-19.7	0.0731835	-12.5	0.00328632	12.9	0.0489278	41.7	0.612794	41.7	0.461792	35.6	0.988942	-5.3
-8.7	8.26942e-05	-8.7	0.0143261	-4.2	0.0102134	-4.2	0.674359	-41.7	0.00331926	0.0309756	0.239309	0.023753	-8.7	0.000381506	0.0018924	0.670929	-31.8	0.00125859	-14	0.00430524	-44.7	0.990732	-34.5	0.0259353	-30.7	0.78819	0.540383	0.420475	20.1	0.00227481	0.0135712	0.0968002	-6	0.000180309	1.3	0.0600889	-19.3	0.0199126	-12.1	0.0841366	13.3	0.0226279	42	0.0232472	42	0.521264	36	0.540276	-4.9
-8.3	2.68503e-05	-8.3	0.0361214	-3.8	0.0098632	-3.8	0.475303	-41.3	0.00732581	0.0857808	0.0739768	0.199651	-8.3	0.000517152	0.00330053	0.982762	-31.4	0.0011106	-13.6	0.000391362	-44.3	0.877034	-34.1	0.0487544	-30.3	0.844195	0.738673	0.645551	20.5	0.0090585	0.00219865	0.668558	-5.6	6.87121e-05	1.7	0.025384	-18.9	0.00570374	-11.7	0.482044	13.6	0.0600134	42.4	0.101849	42.4	0.60244	36.4	0.0963567	-4.5
-8	9.56683e-07	-8	0.00381294	-3.4	0.0625674	-3.4	0.773334	-40.9	0.00131987	0.0211042	0.0584599	0.0528584	-7.9	0.010002	0.107109	0.691001	-31.1	0.000886412	-13.3	4.7935e-05	-43.9	0.954688	-33.7	0.0680456	-29.9	0.68735	0.285404	0.721067	20.8	0.00136236	0.000907722	0.758574	-5.3	0.00044226	2	0.0539521	-18.6	0.0130887	-11.4	0.902234	14	0.0840032	42.8	0.263098	42.8	0.32726	36.7	0.0795293	-4.2
-7.6	1.04661e-08	-7.6	0.0164264	-3	0.145811	-3	0.217836	-40.5	0.00162083	0.0504765	0.0239164	0.0636441	-7.6	0.0100029	0.0419416	0.428014	-30.7	0.000631567	-12.9	0.000267098	-43.6	0.538695	-33.3	0.0482079	-29.5	0.352847	0.185994	0.843328	21.2	5.90161e-05	9.6485e-06	0.883534	-5	0.000212832	2.3	0.0854077	-18.2	0.011317	-11	0.783183	14.4	0.0508113	43.2	0.203475	43.2	0.440958	37.1	0.254149	-3.8
-7.2	1.26645e-07	-7.2	0.0183119	-2.7	0.236775	-2.7	0.189151	-40.2	0.000878778	0.0116219	0.113687	0.0412151	-7.2	0.00644558	0.0110896	0.305801	-30.3	0.000740911	-12.5	4.23123e-07	-43.2	0.387623	-33	0.0573028	-29.2	0.32976	0.177442	0.920596	21.6	0.00738064	0.00301401	0.436424	-4.7	0.000122653	2.7	0.141616	-17.8	0.016929	-10.6	0.734429	14.8	0.0581577	43.6	0.155576	43.6	0.982496	37.5	0.270879	-3.4
-6.8	3.89916e-06	-6.8	0.0200567	-2.3	0.432266	-2.3	0.570301	-39.8	0.00230326	0.00629493	0.370938	0.0202163	-6.8	0.0108228	0.0389574	0.434927	-29.9	0.000224495	-12.1	0.000207393	-42.8	0.636769	-32.6	0.100582	-28.8	0.121043	0.117202	0.828792	22	0.0670248	0.0583988	0.985729	-4.3	3.13363e-05	3	0.12553	-17.4	0.0318443	-10.2	0.361594	15.2	0.134032	43.9	0.50015	43.9	0.774045	37.9	0.882644	-3
-6.4	6.48839e-05	-6.4	0.0576067	-1.9	0.62862	-1.9	0.723538	-39.4	0.00044325	0.0147147	0.0995585	0.0679821	-6.4	0.00555523	0.0200511	0.90596	-29.5	9.1568e-05	-11.7	0.0012056	-42.4	0.395449	-32.2	0.108108	-28.4	0.00959805	0.0186345	0.553631	22.3	0.0968539	0.0669578	0.94007	-4	2.98444e-05	3.3	0.132272	-17	0.0328262	-9.8	0.129926	15.5	0.0813157	44.3	0.631708	44.3	0.342907	38.3	0.692868	-2.7
-6.1	0.000405449	-6.1	0.0310922	-1.5	0.675194	-1.5	0.996395	-39	0.000325758	0.00400277	0.323575	0.0281391	-6.1	0.0089402	0.023913	0.906024	-29.2	0.000176683	-11.4	0.00215162	-42	0.509001	-31.8	0.0483976	-28	0.0117487	0.0349455	0.764152	22.7	0.0835482	0.0405066	0.615509	-3.7	6.16913e-05	3.7	0.115783	-16.7	0.0242189	-9.5	0.137109	15.9	0.0704356	44.7	0.376028	44.7	0.570055	38.6	0.301567	-2.3
-5.7	8.58716e-05	-5.7	0.0195364	-1.1	0.360494	-1.1	0.334727	-38.6	0.00428533	0.0107742	0.639558	0.0932246	-5.7	0.013551	0.0348272	0.706264	-28.8	4.73597e-05	-11	0.0027166	-41.7	0.646263	-31.4	0.0232046	-27.7	0.0252042	0.0187866	0.861542	23.1	0.0452185	0.0425161	0.93478	-3.3	7.05584e-05	4	0.0886033	-16.3	0.094777	-9.1	0.138888	16.3	0.276664	45.1	0.143508	45.1	0.79865	39	0.618118	-1.9
-5.3	0.000154501	-5.3	0.100328	-0.8	0.365392	-0.8	0.185449	-38.3	0.00353959	0.0149001	0.482904	0.120714	-5.3	0.00336235	0.00509287	0.579017	-28.4	3.98476e-05	-10.6	0.00130028	-41.3	0.790365	-31.1	0.0553249	-27.3	0.172928	0.0280579	0.487715	23.5	0.029915	0.0313451	0.851308	-3	2.57471e-05	4.3	0.0493804	-15.9	0.0724309	-8.7	0.0587625	16.7	0.0729058	45.5	0.341779	45.5	0.921689	39.4	0.602694	-1.5
-4.9	5.00325e-05	-4.9	0.0443364	-0.4	0.210676	-0.4	0.682727	-37.9	0.0170543	0.0160725	0.924781	0.115543	-4.9	0.0194695	0.00804888	0.540063	-28	6.77632e-05	-10.2	0.00143318	-40.9	0.669031	-30.7	0.021842	-26.9	0.209583	0.019671	0.640939	23.9	0.00502254	0.00949125	0.425823	-2.7	3.93139e-05	4.6	0.135673	-15.5	0.142066	-8.3	0.11441	17	0.116193	45.8	0.169011	45.8	0.306823	39.8	0.608394	-1.1
-4.5	3.99217e-05	-4.5	0.368318	0	0.0739828	0	0.698847	-37.5	0.0227315	0.0252786	0.787953	0.102343	-4.5	0.0258544	0.0115634	0.550815	-27.7	0.00172663	-9.8	0.000935215	-40.5	0.775497	-30.3	0.0251582	-26.5	0.238961	0.00875725	0.612126	24.2	0.00713083	0.00230082	0.755597	-2.3	0.000100589	5	0.26712	-15.2	0.130161	-8	0.326972	17.4	0.154514	46.2	0.746978	46.2	0.29372	40.2	0.274342	-0.8
-4.2	2.08925e-06	-4.2	0.166978	0.4	0.00839888	0.4	0.493913	-37.1	0.0295338	0.0268445	0.840717	0.0972199	-4.2	0.01701	0.0185415	0.30862	-27.3	0.00234366	-9.5	0.000612701	-40.2	0.774589	-29.9	0.018524	-26.1	0.320951	0.0618192	0.887159	24.6	0.0114101	0.000701284	0.346159	-2	0.00186891	5.3	0.297654	-14.8	0.086546	-7.6	0.364188	17.8	0.0928336	46.6	0.492062	46.6	0.337188	40.5	0.146704	-0.4
-3.8	7.36234e-06	-3.8	0.0028585	0.8	0.00302746	0.8	0.467636	-36.7	0.00685317	0.0239082	0.458471	0.0847001	-3.8	0.146609	0.0831971	0.472805	-26.9	0.000136215	-9.1	0.000974008	-39.8	0.930929	-29.5	0.00413522	-25.8	0.767446	0.515555	0.904509	25	0.00388081	0.000638408	0.816361	-1.7	0.0175434	5.6	0.394364	-14.4	0.162101	-7.2	0.218569	18.2	0.0628291	47	0.712351	47	0.484131	40.9	0.465048	0
-3.4	0.000169335	-3.4	0.00136684	1.1	0.00791245	1.1	0.293773	-36.4	0.0209681	0.0751177	0.399228	0.190845	-3.4	0.0501124	0.034486	0.77382	-26.5	1.65109e-06	-8.7	4.47438e-05	-39.4	0.822973	-29.2	0.00180135	-25.4	0.849191	0.941905	0.8753	25.4	0.0124273	0.00256417	0.337669	-1.3	0.094984	6	0.177627	-14	0.245341	-6.8	0.358015	18.6	0.175896	47.3	0.206933	47.3	0.65749	41.3	0.362925	0.4
-3	0.000246705	-3	0.0014961	1.5	0.0102389	1.5	0.200989	-36	0.0348108	0.19289	0.277238	0.440083	-3	0.0205573	0.0466429	0.660179	-26.1	2.19742e-06	-8.3	2.5963e-05	-39	0.814579	-28.8	0.00248993	-25	0.458111	0.463312	0.730461	25.8	0.00257938	0.000298332	0.343873	-1	0.270321	6.3	0.148063	-13.6	0.104238	-6.4	0.707836	18.9	0.301427	47.7	0.214549	47.7	0.908278	41.7	0.739289	0.8
-2.7	0.000194206	-2.7	0.0110462	1.9	0.0184699	1.9	0.148034	-35.6	0.152808	0.421672	0.39886	0.532551	-2.6	0.0248401	0.0522291	0.694446	-25.8	1.445e-05	-8	0.000169012	-38.6	0.447172	-28.4	0.00650912	-24.6	0.919321	0.184055	0.442933	26.1	0.000419826	9.7272e-05	0.818852	-0.7	0.464978	6.6	0.157442	-13.3	0.0988306	-6.1	0.170989	19.3	0.0154676	48.1	0.976183	48.1	0.3719	42	0.888042	1.1
-2.3	0.000522553	-2.3	0.141492	2.3	0.0698344	2.3	0.082774	-35.2	0.347871	0.491686	0.652916	0.478615	-2.3	0.0698469	0.0727843	0.844023	-25.4	5.64319e-05	-7.6	2.49073e-06	-38.3	0.410878	-28	0.0137675	-24.2	0.862017	0.360718	0.402879	26.5	0.00164087	0.000381451	0.712571	-0.3	0.8171	7	0.0697728	-12.9	0.0409154	-5.7	0.118944	19.7	0.0284434	48.5	0.687936	48.5	0.618782	42.4	0.916514	1.5
-1.9	0.000128757	-1.9	0.94451	2.7	0.113846	2.7	0.155049	-34.8	0.269238	0.636468	0.471103	0.23321	-1.9	0.184251	0.192814	0.801414	-25	0.000157704	-7.2	9.67961e-07	-37.9	0.534299	-27.7	0.0245883	-23.9	0.860964	0.296679	0.339765	26.9	1.11537e-05	4.13434e-05	0.384237	0	0.503613	7.3	0.101227	-12.5	0.178188	-5.3	0.011578	20.1	0.0574683	48.9	0.949878	48.9	0.266862	42.8	0.47416	1.9
-1.5	0.000287116	-1.5	0.693166	3	0.102587	3	0.128131	-34.5	0.228092	0.260014	0.778992	0.243787	-1.5	0.375879	0.15788	0.624929	-24.6	0.000321884	-6.8	0.000309773	-37.5	0.929726	-27.3	0.0408338	-23.5	0.926392	0.33366	0.477335	27.3	0.00012709	0.000194733	0.769912	0.3	0.561575	7.6	0.0512705	-12.1	0.406699	-4.9	0.0407189	20.5	0.0174689	49.2	0.773702	49.2	0.377218	43.2	0.99501	2.3
-1.1	0.000264206	-1.1	0.478348	3.4	0.254961	3.4	0.192677	-34.1	0.630604	0.844681	0.764915	0.418003	-1.1	0.690391	0.223931	0.532141	-24.2	0.000215265	-6.4	0.00595509	-37.1	0.548458	-26.9	0.0279592	-23.1	0.68386	0.325971	0.625359	27.7	0.0226174	0.0073339	0.809528	0.7	0.806123	8	0.0164634	-11.7	0.290994	-4.5	0.103643	20.8	0.00108794	49.6	0.447996	49.6	0.53126	43.6	0.609508	2.7
-0.8	0.00110543	-0.8	0.246766	3.8	0.471338	3.8	0.226407	-33.7	0.428621	0.83104	0.394345	0.0844318	-0.8	0.947265	0.299554	0.312011	-23.9	0.000632344	-6.1	0.00270815	-36.7	0.912589	-26.5	0.0370573	-22.7	0.961387	0.294651	0.392519	28	0.0103585	0.0259333	0.660259	1	0.618595	8.3	0.0256523	-11.4	0.227962	-4.2	0.0980052	21.2	0.00437427	50	0.491463	50	0.350086	43.9	0.828444	3
-0.4	0.00120031	-0.4	0.150667	4.2	0.289388	4.2	0.197309	-33.3	0.348526	0.821195	0.309725	0.0226647	-0.4	0.696117	0.589423	0.477472	-23.5	0.000760764	-5.7	0.0021811	-36.4	0.524051	-26.1	0.0558825	-22.3	0.649235	0.23461	0.629898	28.4	0.0149199	0.0880406	0.129275	1.3	0.544141	8.6	0.218184	-11	0.140625	-3.8	0.0777487	21.6	0.002238	50.4	0.422731	50.4	0.210086	44.3	0.843486	3.4
0	0.00099593	0	0.18893	4.5	0.156227	4.5	0.197616	-33	0.58532	0.944517	0.568029	0.0749774	0	0.910155	0.585502	0.521798	-23.1	0.00097455	-5.3	0.000490406	-36	0.279746	-25.8	0.0244484	-22	0.460348	0.332982	0.991425	28.8	0.0117689	0.0066951	0.930973	1.7	0.58077	9	0.492676	-10.6	0.162452	-3.4	0.569865	22	0.00149643	50.8	0.079122	50.8	0.187463	44.7	0.938766	3.8
0.4	0.000151213	0.4	0.235136	4.9	0.111861	4.9	0.429294	-32.6	0.686549	0.462329	0.387564	0.255668	0.4	0.897373	0.170828	0.835901	-22.7	0.000393648	-4.9	0.000750625	-35.6	0.170877	-25.4	0.0371845	-21.6	0.272023	0.451022	0.496004	29.2	0.0330961	0.000104627	0.474419	2	0.43592	9.3	0.549925	-10.2	0.197411	-3	0.244724	22.3	0.00482605	51.1	0.0801092	51.1	0.458152	45.1	0.777603	4.2
0.8	9.01794e-05	0.8	0.275923	5.3	0.105639	5.3	0.165124	-32.2	0.751092	0.394041	0.331826	0.770955	0.8	0.466985	0.148167	0.617198	-22.3	0.00023989	-4.5	0.000298373	-35.2	0.128298	-25	0.0948711	-21.2	0.0687709	0.193693	0.245303	29.5	0.016461	0.00049946	0.774137	2.3	0.37576	9.6	0.636555	-9.8	0.0498311	-2.7	0.0349856	22.7	0.00214822	51.5	0.227174	51.5	0.489781	45.5	0.981545	4.5
1.1	0.000145871	1.1	0.301378	5.7	0.112877	5.7	0.0919437	-31.8	0.685858	0.637602	0.454639	0.604484	1.1	0.325328	0.176667	0.386447	-22	0.000218228	-4.2	0.000243059	-34.8	0.0571524	-24.6	0.183542	-20.8	0.00866183	0.103422	0.0595759	29.9	0.0807637	0.00288174	0.627571	2.7	0.19683	10	0.51634	-9.5	0.0450931	-2.3	0.128436	23.1	0.00497568	51.9	0.316749	51.9	0.209153	45.8	0.535372	4.9
1.5	0.000249326	1.5	0.2739	6.1	0.117394	6.1	0.0825126	-31.4	0.998342	0.878809	0.905843	0.565584	1.5	0.136738	0.046767	0.169394	-21.6	4.63246e-07	-3.8	0.00134656	-34.5	0.0261702	-24.2	0.106771	-20.5	0.0188181	0.0985484	0.141983	30.3	0.0722849	0.0229303	0.957453	3	0.0493241	10.3	0.859361	-9.1	0.202403	-1.9	0.191134	23.5	0.0200968	52.3	0.656237	52.3	0.363225	46.2	0.443149	5.3
1.9	0.000339045	1.9	0.416917	6.4	0.020144	6.4	0.250742	-31.1	0.818636	0.695823	0.955879	0.454815	1.9	0.190057	0.0692297	0.231905	-21.2	1.43114e-06	-3.4	0.00651006	-34.1	0.0141731	-23.9	0.202304	-20.1	0.0112883	0.0689123	0.123887	30.7	0.015308	0.0362699	0.420534	3.3	0.0391663	10.6	0.894048	-8.7	0.190167	-1.5	0.212727	23.9	0.0521664	52.7	0.216322	52.7	0.305724	46.6	0.641602	5.7
2.3	0.000104444	2.3	0.569607	6.8	0.0190301	6.8	0.255097	-30.7	0.572283	0.318667	0.869865	0.892365	2.3	0.127988	0.0805482	0.105411	-20.8	9.09973e-06	-3	0.00946303	-33.7	0.0241368	-23.5	0.404305	-19.7	0.0185206	0.0296508	0.313315	31.1	0.158748	0.0411926	0.700572	3.7	0.0291214	11	0.976947	-8.3	0.186984	-1.1	0.0726164	24.2	0.112765	53	0.408463	53	0.0289204	47	0.97792	6.1
2.7	0.000303588	2.7	0.439726	7.2	0.00478544	7.2	0.193625	-30.3	0.391342	0.11256	0.750072	0.619698	2.6	0.0807636	0.153825	0.0822799	-20.5	6.92137e-05	-2.7	0.0120652	-33.3	0.0877903	-23.1	0.539485	-19.3	0.00856312	0.176278	0.119868	31.4	0.188262	0.041444	0.68233	4	0.0537467	11.3	0.776614	-8	0.16617	-0.8	0.0719646	24.6	0.0361434	53.4	0.676168	53.4	0.239826	47.3	0.865199	6.4
3	0.000182971	3	0.359098	7.6	0.0314646	7.6	0.256691	-29.9	0.201127	0.0731126	0.980338	0.570498	3	0.213611	0.385428	0.233974	-20.1	5.389e-06	-2.3	0.0096492	-33	0.0895619	-22.7	0.864383	-18.9	0.0229647	0.0292372	0.926752	31.8	0.64259	0.293895	0.606795	4.3	0.0803256	11.6	0.727772	-7.6	0.055585	-0.4	0.0682851	25	0.0159601	53.8	0.919017	53.8	0.144285	47.7	0.356411	6.8
3.4	0.00122961	3.4	0.38716	8	0.0434072	8	0.174074	-29.5	0.97845	0.727247	0.858316	0.931475	3.4	0.173178	0.678018	0.210147	-19.7	1.67287e-06	-1.9	0.00528762	-32.6	0.0504526	-22.3	0.787569	-18.6	0.0911688	0.0667923	0.922459	32.2	0.290614	0.163589	0.887399	4.6	0.0287228	12	0.965949	-7.2	0.00674827	0	0.0672463	25.4	0.00615679	54.2	0.290107	54.2	0.149457	48.1	0.394757	7.2
3.8	6.27468e-05	3.8	0.226495	8.3	0.153321	8.3	0.021145	-29.2	0.838778	0.943337	0.80637	0.970568	3.8	0.319718	0.985799	0.304047	-19.3	0.000165497	-1.5	0.00280378	-32.2	0.0615602	-22	0.404435	-18.2	0.172883	0.067362	0.821261	32.6	0.204486	0.0637632	0.788031	5	0.0123762	12.3	0.501605	-6.8	0.00632035	0.4	0.0343024	25.8	0.00303708	54.5	0.740405	54.5	0.276083			7.6
4.2	6.54285e-06	4.2	0.168815	8.7	0.238701	8.7	0.00311654	-28.8	0.801583	0.754281	0.645329	0.983526	4.2	0.52337	0.663211	0.0543705	-18.9	0.000117678	-1.1	0.000554863	-31.8	0.100437	-21.6	0.190959	-17.8	0.263925	0.0566226	0.542488	33	0.316103	0.0182071	0.958124	5.3	0.00751935	12.6	0.178729	-6.4	0.042589	0.8	0.110142	26.1	0.0103664	54.9	0.694709	54.9	0.0721822			8
4.5	4.12155e-06	4.5	0.180381	9.1	0.26325	9.1	0.00164443	-28.4	0.655192	0.803716	0.502364	0.838302	4.5	0.414107	0.222904	0.00937268	-18.6	6.4655e-05	-0.8	0.000613866	-31.4	0.126035	-21.2	0.0680563	-17.4	0.397248	0.1982	0.825217	33.3	0.119659	0.0261058	0.903149	5.6	0.00891397	13	0.121361	-6.1	0.0355708	1.1	0.370211	26.5	0.025771			55.3	0.0743158			8.3
4.9	3.69645e-05	4.9	0.162362	9.5	0.611661	9.5	0.00456959	-28	0.781677	0.469453	0.440013	0.841026	4.9	0.347851	0.0346817	0.00130097	-18.2	5.49576e-05	-0.4	0.00301756	-31.1	0.189994	-20.8	0.0521648	-17	0.270068	0.0489935	0.654706	33.7	0.00479483	0.0167872	0.404518	6	0.0179481	13.3	0.0335842	-5.7	0.0264963	1.5	0.113031	26.9	0.0592569			55.7	0.0940822			8.7
5.3	8.75533e-05	5.3	0.107949	9.8	0.516319	9.8	0.0100718	-27.7	0.979214	0.661063	0.774215	0.680853	5.3	0.447369	0.0276769	0.00337721	-17.8	2.14946e-06	0	0.00259991	-30.7	0.168946	-20.5	0.0488009	-16.7	0.097148	0.019606	0.828085	34.1	0.0834932	0.154796	0.706282	6.3	0.00913533	13.6	0.0699536	-5.3	0.0605127	1.9	0.0116485	27.3	0.0672543			56.1	0.181607			9.1
5.7	1.56168e-05	5.7	0.0627681	10.2	0.891711	10.2	0.0272472	-27.3	0.995826	0.756446	0.800941	0.472997	5.7	0.401945	0.107321	0.0129152	-17.4	1.09436e-05	0.4	0.00322931	-30.3	0.0985102	-20.1	0.0379544	-16.3	0.214622	0.00161989	0.746545	34.5	0.00413312	0.0202219	0.74652	6.6	0.00596313	13.9	0.0216037	-4.9	0.0242438	2.3	0.00263644	27.7	0.116353			56.4	0.113476			9.5
6.1	1.63964e-05	6.1	0.0246721	10.6	0.282861	10.6	0.119475	-26.9	0.805836	0.925068	0.777727	0.549328	6	0.965818	0.519835	0.00372935	-17	1.0422e-05	0.8	0.000260392	-29.9	0.0414389	-19.7	0.0352081	-15.9	0.0288073	0.00389727	0.534634	34.8	0.339031	0.376898	0.997988	7	0.00547712	14.3	0.0177749	-4.5	0.0115704	2.7	0.00463288	28	0.218643			56.8	0.468332			9.8
6.4	4.67716e-05	6.4	0.0125958	11	0.0111731	11	0.398292	-26.5	0.48803	0.992424	0.464615	0.82054	6.4	0.959849	0.406907	0.000352086	-16.7	0.000100682	1.1	0.000408556	-29.5	0.0287065	-19.3	0.126694	-15.5	0.0365703	0.00243671	0.593767	35.2	0.903431	0.558267	0.572752	7.3	0.00163126	14.6	0.156096	-4.2	0.00420921	3	0.0160217	28.4	0.285946			57.2	0.848989			10.2
6.8	3.47613e-05	6.8	0.0134313	11.4	0.0103262	11.4	0.143201	-26.1	0.197	0.669012	0.290321	0.388528	6.8	0.748568	0.82737	0.000120692	-16.3	0.00113484	1.5	0.00155668	-29.2	0.115224	-18.9	0.153286	-15.2	0.0434246	0.0177293	0.717516	35.6	0.620167	0.578093	0.352389	7.6	0.00124436	14.9	0.149819	-3.8	0.011324	3.4	0.154373	28.8	0.0870281			57.6	0.849008			10.6
7.2	4.45307e-06	7.2	0.0303565	11.7	0.00372712	11.7	0.195206	-25.8	0.0865705	0.22569	0.290628	0.157454	7.2	0.491518	0.748611	0.000392827	-15.9	0.000548322	1.9	0.0054792	-28.8	0.163251	-18.6	0.146617	-14.8	0.0269578	0.000852468	0.969357	36	0.895529	0.690992	0.751665	8	0.000670574	15.3	0.100075	-3.4	0.0227282	3.8	0.162257	29.2	0.0891238			58	0.484007			11
7.6	7.7718e-06	7.6	0.065829	12.1	0.00184181	12.1	0.263328	-25.4	0.0431902	0.0153617	0.579789	0.0289317	7.6	0.625786	0.662691	0.00260494	-15.5	0.000388517	2.3	0.000347597	-28.4	0.282985	-18.2	0.209761	-14.4	0.00192132	0.000689291	0.637409	36.4	0.424269	0.616493	0.556803	8.3	0.000233673	15.6	0.104966	-3	0.00116779	4.2	0.0812472	29.5	0.174785			58.3	0.525084			11.4
8	8.32102e-05	8	0.0549892	12.5	0.0205773	12.5	0.238742	-25	0.20363	0.084752	0.889009	0.0692529	7.9	0.488539	0.422062	0.0118855	-15.2	0.000312512	2.7	0.00189241	-28	0.351302	-17.8	0.26743	-14	0.00726647	0.00100272	0.796834	36.7	0.128288	0.202468	0.325473	8.6	9.25573e-05	15.9	0.36234	-2.7	0.00630752	4.5	0.134162	29.9	0.190431			58.7	0.938073			11.7
8.3	3.14911e-05	8.3	0.0308947	12.9	0.0171103	12.9	0.0766735	-24.6	0.1472	0.0418811	0.978632	0.0963547	8.3	0.248699	0.651148	0.0216649	-14.8	0.000453038	3	0.00490634	-27.7	0.330606	-17.4	0.409782	-13.6	0.021416	0.000122791	0.718229	37.1	0.0312349	0.0592124	0.372734	9	0.000195412	16.3	0.497952	-2.3	0.000720802	4.9	0.204215	30.3	0.0393599			59.1	0.721452			12.1
8.7	0.000115132	8.7	0.0166445	13.3	0.0369578	13.3	0.00322074	-24.2	0.112478	0.100872	0.702089	0.0521304	8.7	0.0379833	0.777194	0.0374739	-14.4	0.000176311	3.4	0.0128163	-27.3	0.194087	-17	0.381715	-13.3	0.0196289	0.000231836	0.468096	37.5	0.141635	0.0804663	0.897042	9.3	0.000150393	16.6	0.502379	-1.9	0.00656872	5.3	0.198635	30.7	0.012089			59.5	0.902648			12.5
9.1	2.44822e-05	9.1	0.011358	13.6	0.199712	13.6	0.0200807	-23.9	0.157441	0.193904	0.702328	0.0740061	9.1	0.0103205	0.667441	0.0567311	-14	2.51654e-05	3.8	0.00899218	-26.9	0.198129	-16.7	0.632701	-12.9	0.101025	0.00389509	0.372227	37.9	0.0108752	0.0388994	0.268036	9.6	0.000343269	16.9	0.24932	-1.5	0.00249218	5.7	0.236286	31.1	0.00282814							12.9
9.5	1.69862e-05	9.5	0.00708419	14	0.141199	14	0.129421	-23.5	0.145784	0.147797	0.745708	0.0537017	9.5	0.00476503	0.419583	0.117719	-13.6	1.24381e-06	4.2	0.00186654	-26.5	0.0983185	-16.3	0.146163	-12.5	0.178321	0.00422804	0.298706	38.3	0.666944	0.249154	0.861644	10	0.000547208	17.3	0.458695	-1.1	0.0228899	6.1	0.519654	31.4	0.00784977							13.3
9.8	1.29858e-05	9.8	0.00423903	14.4	0.0861847	14.4	0.053423	-23.1	0.129563	0.0881154	0.860662	0.076448	9.8	0.00495177	0.123549	0.341643	-13.3	3.95169e-08	4.5	0.000563977	-26.1	0.0853549	-15.9	0.174612	-12.1	0.367522	0.0484104	0.554422	38.6	0.30826	0.21689	0.847206	10.3	0.000118638	17.6	0.766055	-0.8	0.106949	6.4	0.0875503	31.8	0.0201883							13.6
10.2	3.68425e-06	10.2	0.00197203	14.8	0.118428	14.8	0.223696	-22.7	0.063501	0.0404541	0.79239	0.0510929	10.2	0.00278469	0.0505444	0.437392	-12.9	0.000461433	4.9	0.000778362	-25.8	0.127302	-15.5	0.195685	-11.7	0.199093	0.016177	0.608768	39	0.0964441	0.017378	0.869048	10.6	4.01785e-05	17.9	0.507554	-0.4	0.146548	6.8	0.0658585	32.2	0.0492617							14
10.6	8.84799e-06	10.6	0.00134167	15.2	0.0737668	15.2	0.381532	-22.3	0.0152366	0.0113411	0.752064	0.0478268	10.6	0.00401708	0.246366	0.361954	-12.5	0.00160588	5.3	0.00063222	-25.4	0.0721426	-15.2	0.281987	-11.4	0.52875	0.149337	0.580499	39.4	0.366626	0.263179	0.791689	11	3.012e-05	18.3	0.536225	0	0.27486	7.2	0.120235	32.6	0.048516							14.4
11	5.64849e-05	11	0.00203747	15.5	0.0230441	15.5	0.171507	-22	0.0241039	0.00730141	0.854369	0.0659312	11	0.0139848	0.224319	0.359982	-12.1	0.00765774	5.7	0.000126001	-25	0.0798213	-14.8	0.430417	-11	0.583288	0.123897	0.332462	39.8	0.338936	0.172771	0.777337	11.3	2.44095e-05	18.6	0.305779	0.4	0.171596	7.6	0.04057	33	0.105659							14.8
11.4	2.5849e-05	11.4	0.00163949	15.9	0.0765087	15.9	0.17313	-21.6	0.0180676	0.0265915	0.491172	0.0390253	11.3	0.00674781	0.0326129	0.664724	-11.7	0.0040895	6.1	0.000641537	-24.6	0.0475824	-14.4	0.603333	-10.6	0.218334	0.144818	0.843395	40.2	0.670471	0.87083	0.723529	11.6	8.09171e-06	18.9	0.479438	0.8	0.165007	8	0.0294053	33.3	0.150327							15.2
11.7	8.73584e-07	11.7	0.000663838	16.3	0.135586	16.3	0.179751	-21.2	0.00694171	0.00693157	0.23766	0.0223164	11.7	0.00123741	0.0275098	0.712781	-11.4	0.000672642	6.4	0.00249019	-24.2	0.145765	-14	0.87409	-10.2	0.135002	0.0902318	0.995785	40.5	0.909362	0.993607	0.894275	12	4.89655e-07	19.3	0.382408	1.1	0.114112	8.3	0.19989	33.7	0.172572							15.5
12.1	4.82122e-07	12.1	0.0018107	16.7	0.0966682	16.7	0.104672	-20.8	0.0186046	0.0553482	0.377909	0.0202125	12.1	0.00100611	0.0521426	0.163528	-11	0.000549269	6.8	0.00343203	-23.9	0.361383	-13.6	0.856044	-9.8	0.0146962	0.0435988	0.788872	40.9	0.361318	0.543993	0.54872	12.3	5.75801e-07	19.6	0.155164	1.5	0.104116	8.7	0.308232	34.1	0.106452							15.9
12.5	3.24592e-06	12.5	0.00932528	17	0.145025	17	0.209974	-20.5	0.017951	0.0380089	0.453526	0.0233099	12.5	0.000709775	0.0129484	0.316538	-10.6	0.000294978	7.2	0.00581297	-23.5	0.295986	-13.3	0.658805	-9.5	0.036999	0.0744597	0.941267	41.3	0.825378	0.825441	0.983234	12.6	2.01399e-06	19.9	0.212842	1.9	0.0171545	9.1	0.403179	34.5	0.0804371							16.3
12.9	1.58792e-06	12.9	0.018348	17.4	0.145827	17.4	0.184629	-20.1	0.0349677	0.114624	0.493971	0.0218175	12.9	0.00227038	0.0227874	0.467804	-10.2	0.000160526	7.6	0.00793303	-23.1	0.159352	-12.9	0.250537	-9.1	0.0157529	0.00942257	0.702042	41.7	0.0526867	0.657778	0.0506694	13	1.44194e-06	20.3	0.10791	2.3	0.00225647	9.5	0.142057	34.8	0.0387963							16.7
13.3	1.15378e-05	13.3	0.0260529	17.8	0.0350275	17.8	0.037347	-19.7	0.0269757	0.0534754	0.58604	0.0431235	13.2	0.00296138	0.0218514	0.581053	-9.8	0.000111055	8	0.00802083	-22.7	0.106511	-12.5	0.81496	-8.7	0.0922002	0.0739323	0.710848	42	0.090082	0.0904393	0.439556	13.3	4.51794e-07	20.6	0.135961	2.7	0.0007058	9.8	0.028841	35.2	0.0139893							17
13.6	3.6759e-05	13.6	0.00564552	18.2	0.169396	18.2	0.0211815	-19.3	0.0245419	0.076351	0.544665	0.0598976	13.6	0.00993977	0.010278	0.470056	-9.5	5.19055e-05	8.3	0.0192072	-22.3	0.182253	-12.1	0.840139	-8.3	0.106546	0.0229918	0.975187	42.4	0.0727316	0.0312692	0.629476	13.6	1.39057e-07	20.9	0.0854093	3	0.00052551	10.2	0.0297914	35.6	0.0129389							17.4
14	4.62602e-06	14	0.00205172	18.6	0.265377	18.6	0.0978905	-18.9	0.0473553	0.11124	0.748418	0.0435888	14	0.00455495	0.00812601	0.367119	-9.1	0.000199946	8.7	0.0240303	-22	0.186406	-11.7	0.899779	-8	0.251165	0.0964837	0.889103	42.8	0.22783	0.0392591	0.5334	13.9	8.87577e-07	21.3	0.255038	3.4	0.00754911	10.6	0.0247078	36	0.0637852							17.8
14.4	4.6709e-06	14.4	0.00398747	18.9	0.121263	18.9	0.0745794	-18.6	0.0165817	0.0520267	0.624005	0.00786748	14.4	0.00411483	0.0100187	0.448557	-8.7	0.000130025	9.1	0.0236383	-21.6	0.197575	-11.4	0.98911	-7.6	0.444222	0.0115962	0.351885	43.2	0.431702	0.0106555	0.312996	14.3	1.19698e-07	21.6	0.159817	3.8	0.0270397	11	0.0763697	36.4	0.125737							18.2
14.8	5.44544e-05	14.8	0.00681323	19.3	0.433099	19.3	0.0276427	-18.2	0.00447495	0.0701063	0.457947	0.00718238	14.7	0.00373178	0.00135068	0.713183	-8.3	0.000245562	9.5	0.0187178	-21.2	0.0857804	-11	0.793671	-7.2	0.645348	0.0878834	0.409914	43.6	0.413988	0.223022	0.726376	14.6	2.57558e-07	21.9	0.0451136	4.2	0.105885	11.4	0.0233798	36.7	0.0716321							18.6
15.2	6.8084e-06	15.2	0.00431125	19.7	0.386062	19.7	0.179869	-17.8	0.00219337	0.0108809	0.554696	0.0015641	15.1	0.00717046	0.0143894	0.749538	-8	3.7247e-05	9.8	0.0234645	-20.8	0.0301067	-10.6	0.420658	-6.8	0.516496	0.0165726	0.408505	43.9	0.610084	0.292384	0.811338	14.9	4.59341e-07	22.3	0.034235	4.5	0.274183	11.7	0.142149	37.1	0.0976301							18.9
15.5	2.53588e-05	15.5	0.0078564	20.1	0.198818	20.1	0.591799	-17.4	0.00460204	0.026499	0.754112	0.00537223	15.5	0.00145455	0.00990786	0.667074	-7.6	5.49107e-05	10.2	0.00496989	-20.5	0.0408174	-10.2	0.334175	-6.4	0.294195	0.00812302	0.552165	44.3		0.794973		15.3	1.09434e-06	22.6	0.0360954	4.9	0.0599454	12.1	0.0663286	37.5	0.0171132							19.3
15.9	5.75263e-05	15.9	0.004097	20.5	0.304133	20.5	0.316095	-17	0.00584535	0.0445624	0.435889	0.000490163	15.9	0.000821284	0.00174868	0.694814	-7.2	9.56334e-05	10.6	0.00199309	-20.1	0.146451	-9.8	0.259785	-6.1	0.340685	0.00223189	0.361994	44.7		0.492075		15.6	9.01246e-07	22.9	0.0522692	5.3	0.0256199	12.5	0.0863525	37.9	0.00524653							19.7
16.3	2.48694e-05	16.3	0.00255655	20.8	0.356736	20.8	0.141618	-16.7	0.00141664	0.0287925	0.278559	3.41112e-05	16.3	0.00213189	0.0264822	0.416587	-6.8	0.000142466	11	0.000104417	-19.7	0.248689	-9.5	0.388815	-5.7	0.104545	0.00381117	0.926135	45.1		0.477509		15.9	8.1769e-07	23.2	0.04341	5.7	0.0185159	12.9	0.0508589	38.3	0.00224032							20.1
16.7	8.60398e-06	16.7	0.00218517	21.2	0.56331	21.2	0.189841	-16.3	0.00112629	0.0130348	0.289899	0.00367245	16.6	0.00698091	0.0373259	0.770606	-6.4	0.000179743	11.4	0.00102911	-19.3	0.115927	-9.1	0.414862	-5.3	0.0822545	0.0353381	0.635497	45.5		0.489352		16.3	1.1401e-06	23.6	0.0443826	6.1	0.0550879	13.3	0.111211	38.6	0.00436672							20.5
17	6.91434e-06	17	0.00161845	21.6	0.119225	21.6	0.0448571	-15.9	0.00296604	0.00919884	0.270914	0.00329444	17	0.0176456	0.0763468	0.454682	-6.1	0.000154658	11.7	0.000364879	-18.9	0.0962593	-8.7	0.387993	-4.9	0.0610698	0.00714579	0.896638	45.8		0.978082		16.6	1.03718e-06	23.9	0.0881403	6.4	0.117173	13.6	0.0960761	39	3.37693e-05							20.8
17.4	1.42683e-06	17.4	0.00405627	22	0.0530065	22	0.0138251	-15.5	0.00208347	0.0205493	0.289174	0.00252331	17.4	0.00578965	0.0326759	0.83878	-5.7	9.86544e-05	12.1	0.000748071	-18.6	0.080165	-8.3	0.510108	-4.5	0.0604069	0.00162299	0.870002	46.2		0.343706		16.9	1.32325e-06	24.2	0.0100968	6.8	0.0950872	14	0.45831	39.4	0.0098921							21.2
17.8	4.32319e-06	17.8	0.00853543	22.3	0.0847948	22.3	0.00769473	-15.2	0.00418672	0.00995987	0.541323	0.00759709	17.8	0.000653486	0.00935201	0.776915	-5.3	0.000155215	12.5	7.96944e-05	-18.2	0.105298	-8	0.334123	-4.2	0.110583	0.00143648	0.688828	46.6		0.481094		17.3	5.65165e-07	24.6	0.00876682	7.2	0.053223	14.4	0.142009	39.8	0.0749299							21.6
18.2	2.08597e-05	18.2	0.00277411	22.7	0.323989	22.7	0.134148	-14.8	0.00233002	0.00475576	0.453005	0.00808494	18.2	0.0021819	0.00864647	0.825739	-4.9	8.33729e-05	12.9	7.93407e-05	-17.8	0.158186	-7.6	0.62166	-3.8	0.0766521	0.00117857	0.428486	47		0.295351		17.6	2.13154e-07	24.9	0.0277532	7.6	0.0119125	14.8	0.22191	40.2	0.130325							22
18.6	4.46755e-06	18.6	0.00210207	23.1	0.300219	23.1	0.0548404	-14.4	0.00375932	0.00925611	0.372762	0.00287471	18.5	0.0067634	0.039248	0.974659	-4.5	6.72428e-06	13.3	0.000520222	-17.4	0.0787512	-7.2	0.703737	-3.4	0.209484	0.0210153	0.711445	47.3		0.648524		17.9	3.74833e-07	25.2	0.00710351	8	0.00361754	15.2	0.320048	40.5	0.0788261							22.3
18.9	4.2896e-05	18.9	0.00444499	23.5	0.138255	23.5	0.0284093	-14	0.00443184	0.00298469	0.729621	0.00174753	18.9	0.0112587	0.0381261	0.882121	-4.2	2.77851e-06	13.6	0.000190389	-17	0.090063	-6.8	0.543012	-3	0.461954	0.118832	0.757458	47.7		0.769904		18.3	1.54386e-07	25.6	0.00616317	8.3	0.056388	15.5	0.357532	40.9	0.0250832							22.7
19.3	7.40682e-05	19.3	0.00356388	23.9	0.230897	23.9	0.121399	-13.6	0.00103695	0.000783525	0.284177	0.00446576	19.3	0.00906453	0.0991386	0.81206	-3.8	1.02741e-05	14	0.000503084	-16.7	0.0796887	-6.4	0.411333	-2.7	0.709764	0.472707	0.899366	48.1		0.842449		18.6	3.52916e-07	25.9	0.0118347	8.7	0.0482274	15.9	0.271228	41.3	0.0667878							23.1
19.7	4.1103e-07	19.7	0.0047409	24.2	0.39316	24.2	0.146732	-13.3	0.00364543	0.0022591	0.18946	0.0575475	19.7	0.00706449	0.0684053	0.764918	-3.4	4.35036e-05	14.4	0.00410122	-16.3	0.102901	-6.1	0.661059	-2.3	0.828994	0.265608	0.211115	48.5		0.541999		18.9	3.1528e-07	26.2	0.00829556	9.1	0.0214042	16.3	0.178892	41.7	0.314409							23.5
20.1	1.07774e-05	20.1	0.00881897	24.6	0.483969	24.6	0.00573785	-12.9	0.00217311	0.00183964	0.126083	0.0299502	20	0.00922473	0.0484456	0.716562	-3	7.09155e-06	14.8	0.00218826	-15.9	0.0389113	-5.7	0.50341	-1.9	0.394178	0.446889	0.094399	48.9		0.102028		19.3	5.23271e-07	26.6	0.0083468	9.5	0.00906943	16.7	0.274565	42	0.764711							23.9
20.5	1.73221e-05	20.5	0.0147867	25	0.276402	25	0.024489	-12.5	0.00290502	0.00374035	0.275161	0.0103223	20.4	0.0132702	0.0362296	0.720524	-2.7	2.00633e-07	15.2	0.001617	-15.5	0.0600486	-5.3	0.259458	-1.5	0.125089	0.979372	0.0267004	49.2		0.0797262		19.6	1.08037e-06	26.9	0.00466241	9.8	0.00354442	17	0.109654	42.4	0.718438							24.2
20.8	1.32084e-05	20.8	0.0138475	25.4	0.375021	25.4	0.282185	-12.1	0.00369377	0.00132229	0.430423	0.00603827	20.8	0.0224275	0.0108752	0.68511	-2.3	3.78809e-06	15.5	0.000685327	-15.2	0.104488	-4.9	0.25824	-1.1	0.0854814	0.73251	0.0555973					19.9	1.8786e-07	27.2	0.0177158	10.2	0.00923914	17.4	0.530252	42.8	0.359794							24.6
21.2	6.51605e-06	21.2	0.0247835	25.8	0.386197	25.8	0.0980849	-11.7	0.00293348	0.00317345	0.25115	0.00389358	21.2	0.0206107	0.0107831	0.729555	-1.9	5.71541e-05	15.9	0.00111932	-14.8	0.110123	-4.5	0.250956	-0.8	0.212351	0.563948	0.268125					20.3	1.61232e-07	27.6	0.0249239	10.6	0.0226401	17.8	0.381308	43.2	0.2361							25
21.6	8.20463e-06	21.6	0.0280699	26.1	0.13707	26.1	0.0387011	-11.4	0.00424584	0.00907552	0.301202	0.00163385	21.6	0.0226582	0.0344384	0.899704	-1.5	0.000149313	16.3	0.000451218	-14.4	0.154375	-4.2	0.294131	-0.4	0.569287	0.368462	0.590357					20.6	3.49667e-09	27.9	0.0160154	11	0.00978312	18.2	0.451117	43.6	0.513049							25.4
22	4.27617e-07	22	0.00704681	26.5	0.144598	26.5	0.00535833	-11	0.000428574	0.000535199	0.545093	0.000980255	21.9	0.00334337	0.00288219	0.063899	-1.1	7.90248e-05	16.7	0.0008562	-14	0.199297	-3.8	0.661662	0	0.783271	0.326658	0.500193					20.9	1.27995e-09	28.2	0.00839819	11.4	0.0460357	18.6	0.276072	43.9	0.433494							25.8
22.3	9.45988e-06	22.3	0.0123187	26.9	0.120295	26.9	0.104389	-10.6	0.000788896	0.000630636	0.728078	0.00159077	22.3	0.0024421	0.0070541	0.0132673	-0.8	0.000277483	17	0.000380661	-13.6	0.339217	-3.4	0.664667	0.4	0.969677	0.454904	0.541824					21.3	1.06736e-08	28.6	0.00178216	11.7	0.00223754	18.9	0.207854	44.3	0.412338							26.1
22.7	3.15766e-06	22.7	0.00977888	27.3	0.110491	27.3	0.377486	-10.2	0.000782931	0.00124269	0.326761	0.00581659	22.7	0.00122161	0.00259461	0.00390041	-0.4	0.00199926	17.4	6.70371e-05	-13.3	0.59971	-3	0.453843	0.8	0.215578	0.86537	0.176565					21.6	2.69275e-09	28.9	0.000494697	12.1	0.00286558	19.3	0.274689	44.7	0.821701							26.5
23.1	6.02303e-05	23.1	0.0048291	27.7	0.0942907	27.7	0.33845	-9.8	0.000819932	0.00326998	0.12018	0.00664668	23.1	0.0039338	0.00770839	0.190418	0	0.000291944	17.8	0.000181585	-12.9	0.75318	-2.7	0.238384	1.1	0.0976461	0.965993	0.0850805					21.9	5.11127e-09	29.2	0.00348229	12.5	0.0192572	19.7	0.185569	45.1	0.595119							26.9
23.5	0.000118838	23.5	0.00151384	28	0.158828	28	0.181613	-9.5	0.000261874	0.0020044	0.122168	0.011585	23.4	0.0275577	0.0536114	0.659331	0.4	0.000203351	18.2	3.60576e-05	-12.5	0.622698	-2.3	0.0797764	1.5	0.142646	0.444627	0.316886					22.3	1.19624e-08	29.6	0.00138658	12.9	0.00724158	20.1	0.230507	45.5	0.704009							27.3
23.9	8.6557e-07	23.9	0.000410736	28.4	0.0871128	28.4	0.078626	-9.1	0.000143535	0.00532672	0.086158	0.0274351	23.8	0.0373184	0.0432855	0.743971	0.8	0.000301016	18.6	7.45959e-05	-12.1	0.249166	-1.9	0.0245513	1.9	0.273677	0.167026	0.910181					22.6	3.19797e-08	29.9	0.00661089	13.3	0.00619962	20.5	0.0398057	45.8	0.249057							27.7
24.2	1.29037e-06	24.2	0.00117737	28.8	0.170237	28.8	0.346434	-8.7	0.000445284	0.0140178	0.0937655	0.0240177	24.2	0.0246861	0.0548325	0.975363	1.1	0.00010761	18.9	0.000143994	-11.7	0.23321	-1.5	0.0645007	2.3	0.765756	0.089965	0.344027					22.9	7.92489e-07	30.2	0.000127797	13.6	0.0116488	20.8	0.0110658	46.2	0.530503							28
24.6	1.97521e-06	24.6	0.00152926	29.2	0.0414001	29.2	0.274526	-8.3	0.00143645	0.00441182	0.231307	0.0236145	24.6	0.0306699	0.272745	0.896989	1.5	2.9102e-05	19.3	3.78425e-05	-11.4	0.211	-1.1	0.0690637	2.7	0.598746	0.0784867	0.0856153					23.2	9.55488e-06	30.6	0.000994554	14	0.00197401	21.2	0.196501	46.6	0.624678							28.4
25	2.27486e-05	25	0.00485898	29.5	0.0734515	29.5	0.578027	-8	0.00127699	0.00220183	0.221985	0.0148888	25	0.0580583	0.105899	0.679237	1.9	0.000574544	19.7	2.49944e-05	-11	0.0672666	-0.8	0.134709	3	0.345272	0.0411824	0.0323718					23.6	4.4741e-06	30.9	0.00435578	14.4	0.00058249	21.6	0.453599	47	0.398527							28.8
25.4	8.53569e-06	25.4	0.00312971	29.9	0.151161	29.9	0.0897671	-7.6	0.00183843	0.0039527	0.299237	0.00501856	25.3	0.00560604	0.0210371	0.939352	2.3	0.00107256	20.1	1.37867e-08	-10.6	0.102593	-0.4	0.281663	3.4	0.0543855	0.0853552	0.00297169					23.9	4.70845e-07	31.2	0.000573743	14.8	0.00347029	22	0.544363	47.3	0.412923							29.2
25.8	3.41406e-06	25.8	0.00385252	30.3	0.28924	30.3	0.159229	-7.2	0.00332173	0.00213031	0.301364	0.000888337	25.7	0.0440116	0.048089	0.595933	2.7	0.000111587	20.5	1.14533e-06	-10.2	0.20765	0	0.452723	3.8	0.086147	0.586407	0.0255441					24.2	3.74082e-07	31.5	6.0126e-05	15.2	0.0108379	22.3	0.633563	47.7	0.626881							29.5
26.1	1.85538e-05	26.1	0.00566895	30.7	0.0690904	30.7	0.480349	-6.8	0.00647397	0.0191884	0.279736	0.0123669	26.1	0.0224222	0.0747838	0.316874	3	0.000119355	20.8	0.000443388	-9.8	0.456466	0.4	0.608977	4.2	0.0890644	0.765515	0.110148					24.6	5.60051e-08	31.9	0.000391051	15.5	0.00653095	22.7	0.609482	48.1	0.896164							29.9
26.5	2.94904e-06	26.5	0.00662912	31.1	0.0257087	31.1	0.392803	-6.4	0.00233662	0.00539223	0.172882	0.00669709	26.5	0.172649	0.209126	0.689408	3.4	5.39925e-05	21.2	0.00555037	-9.5	0.749094	0.8	0.835672	4.5	0.0362554	0.189454	0.271875					24.9	1.07481e-08	32.2	0.00283937	15.9	0.00228389	23.1	0.245133	48.5	0.869504							30.3
26.9	4.62311e-05	26.9	0.00428926	31.4	0.266673	31.4	0.45541	-6.1	0.00248754	0.00492052	0.188822	0.00540175	26.8	0.716155	0.131709	0.366063	3.8	9.35541e-06	21.6	0.0116943	-9.1	0.930747	1.1	0.598781	4.9	0.0641584	0.0494147	0.687718					25.2	1.24895e-07	32.5	0.000877126	16.3	0.00303525	23.5	0.645718	48.9	0.42309							30.7
27.3	2.53446e-05	27.3	0.00388062	31.8	0.978159	31.8	0.219178	-5.7	0.00291795	0.00684532	0.328116	0.00332892	27.2	0.950343	0.21122	0.445724	4.2	1.19211e-05	22	0.0111282	-8.7	0.873381	1.5	0.757477	5.3	0.0121432	0.0479798	0.412875					25.6	1.16199e-07	32.9	0.00461442	16.7	0.00373646	23.9	0.0596724	49.2	0.220319							31.1
27.7	5.00751e-06	27.7	0.00247834	32.2	0.480102	32.2	0.517437	-5.3	0.00262456	0.00912461	0.335577	0.00150594	27.6	0.862168	0.113771	0.359436	4.5	1.30559e-05	22.3	0.00899539	-8.3	0.700013	1.9	0.759815	5.7	0.00235405	0.0259475	0.283516					25.9	1.4461e-07	33.2	0.00651698	17	0.00104078	24.2	0.0897882	49.6	0.137685							31.4
28	2.88728e-07	28	0.000957149	32.6	0.143509	32.6	0.397547	-4.9	0.00458522	0.00971339	0.369411	0.00253516	28	0.136234	0.0207362	0.676291	4.9	0.000144614	22.7	0.00687882	-8	0.634014	2.3	0.522515	6.1	0.00638533	0.0052489	0.871033					26.2	1.92944e-07	33.5	0.0114245	17.4	0.00154656	24.6	0.0462879	50	0.0306315							31.8
28.4	7.38051e-07	28.4	0.00287314	33	0.0375568	33	0.315872	-4.5	0.00506896	0.0102614	0.304055	2.8909e-06	28.4	0.00519223	0.00469605	0.193308	5.3	0.000273231	23.1	0.00814978	-7.6	0.713998	2.7	0.181501	6.4	0.00126289	0.00412211	0.425119					26.6	1.42828e-06	33.9	0.0108563	17.8	0.00828625	25	0.0250045	50.4	0.0108186							32.2
28.8	6.1501e-08	28.8	0.00641908	33.3	0.126348	33.3	0.7707	-4.2	0.00296334	0.0128125	0.298861	0.000209113	28.7	0.00288883	0.0017572	0.0672921	5.7	9.35612e-05	23.5	0.0040205	-7.2	0.658048	3	0.0899056	6.8	0.000192901	0.00212233	0.0892225					26.9	7.88366e-07	34.2	0.00612101	18.2	0.0257545	25.4	0.116937	50.8	0.0194747							32.6
29.2	8.43983e-07	29.2	0.0121069	33.7	0.0745025	33.7	0.557938	-3.8	0.00182191	0.0147048	0.209133	0.000292669	29.1	0.0232493	0.0227371	0.0829883	6.1	1.00554e-05	23.9	0.00106531	-6.8	0.726678	3.4	0.110875	7.2	1.40696e-05	0.00173619	0.00868858					27.2	4.17755e-07	34.5	0.0202669	18.6	0.0617237	25.8	0.183668	51.1	0.0550741							33
29.5	1.26096e-05	29.5	0.0247044	34.1	0.0866495	34.1	0.0978729	-3.4	0.00302612	0.028546	0.200937	0.000496781	29.5	0.00118239	0.00378399	0.0639022	6.4	1.04259e-05	24.2	0.000338505	-6.4	0.967983	3.8	0.106051	7.6	3.90378e-05	0.00203484	0.0116087					27.6	2.5004e-07	34.9	0.0205473	18.9	0.0288915	26.1	0.660013	51.5	0.142042							33.3
29.9	1.13612e-06	29.9	0.00996544	34.5	0.214439	34.5	0.886191	-3	0.00130388	0.00606881	0.105147	4.47715e-05	29.9	0.0279025	0.023263	0.385816	6.8	3.2133e-05	24.6	0.00129889	-6.1	0.939232	4.2	0.137162	8	3.44691e-07	0.00677275	0.000173419					27.9	4.39668e-06	35.2	0.0400988	19.3	0.011772	26.5	0.410201	51.9	0.136925							33.7
30.3	3.02852e-06	30.3	0.00598445	34.8	0.0459377	34.8	0.84672	-2.7	0.0076169	0.131471	0.0572567	0.00177766	30.3	0.138644	0.102976	0.815446	7.2	0.000178804	25	0.000126864	-5.7	0.839519	4.5	0.175118	8.3	1.26686e-06	0.000315568	0.00730059					28.2	2.38715e-05	35.5	0.00983779	19.7	0.015735	26.9	0.698948	52.3	0.478912							34.1
30.7	2.12209e-06	30.7	0.0033243	35.2	0.0481801	35.2	0.584867	-2.3	0.00408198	0.106088	0.0434896	0.0044006	30.6	0.106538	0.214013	0.575549	7.6	0.000451954	25.4	2.43615e-05	-5.3	0.879125	4.9	0.244611	8.7	2.50629e-05	0.000133211	0.0422141					28.6	1.89881e-05	35.9	0.0194102	20.1	0.131666	27.3	0.735812	52.7	0.893603							34.5
31.1	2.02013e-08	31.1	0.0242102	35.6	0.0808875	35.6	0.502998	-1.9	0.0146262	0.187095	0.0677024	0.0365503	31	0.35316	0.287713	0.0588059	8	0.000619604	25.8	1.07067e-05	-4.9	0.69984	5.3	0.179806	9.1	8.41754e-05	0.000182034	0.134133					28.9	1.48552e-05	36.2	0.00907748	20.5	0.075722	27.7	0.954987	53	0.976706							34.8
31.4	2.34247e-08	31.4	0.0246291	36	0.220979	36	0.0626836	-1.5	0.222271	0.888291	0.142487	0.182973	31.4	0.837067	0.509439	0.0433156	8.3	0.000140964	26.1	3.94621e-05	-4.5	0.602312	5.7	0.0916996	9.5	0.000125534	6.9673e-05	0.253515					29.2	5.92699e-06	36.5	0.0382913	20.8	0.0182705	28	0.653189	53.4	0.77632							35.2
31.8	2.37873e-06	31.8	0.0265387	36.4	0.862868	36.4	0.0887789	-1.1	0.207737	0.664383	0.271109	0.0448875	31.8	0.830138	0.92439	0.0872914	8.7	0.000247268	26.5	4.21173e-05	-4.2	0.503186	6.1	0.0451298	9.8	0.000624243	0.00010397	0.500151					29.6	5.45663e-06	36.9	0.00634885	21.2	0.0446332	28.4	0.958301	53.8	0.902478							35.6
32.2	5.94451e-06	32.2	0.0089847	36.7	0.238136	36.7	0.348743	-0.8	0.340287	0.64473	0.503037	0.0815552	32.1	0.353325	0.658349	0.800817	9.1	0.000224161	26.9	0.00181922	-3.8	0.359277	6.4	0.00957759	10.2	0.00043189	4.25776e-06	0.962607					29.9	3.52782e-06	37.2	0.0251834	21.6	0.112294	28.8	0.955917	54.2	0.963316							36
32.6	3.62546e-07	32.6	0.0135464	37.1	0.281955	37.1	0.744077	-0.4	0.462659	0.844814	0.439891	0.182581	32.5	0.235719	0.308546	0.874273	9.5	0.000146599	27.3	0.000159407	-3.4	0.298627	6.8	0.00309539	10.6	0.00016375	6.69045e-05	0.254391					30.2	6.74533e-06	37.5	0.0251454	22	0.130117	29.2	0.287234	54.5	0.403824							36.4
33	3.55547e-06	33	0.000449979	37.5	0.174421	37.5	0.953308	0	0.484722	0.726754	0.618977	0.137011	32.9	0.252227	0.257348	0.737752	9.8	0.000138756	27.7	3.68742e-05	-3	0.358683	7.2	0.00738343	11	0.000560952	0.000154378	0.481832					30.6	1.68097e-05	37.9	0.00827548	22.3	0.0116631	29.5	0.833819	54.9	0.411098							36.7
33.3	3.01592e-07	33.3	0.000177633	37.9	0.473378	37.9	0.925821	0.4	0.701631	0.820967	0.851936	0.155345	33.3	0.14709	0.333497	0.629475	10.2	0.00049278	28	0.000113487	-2.7	0.36437	7.6	0.0452946	11.4	0.00134493	0.000157285	0.432441					30.9	1.00419e-05	38.2	0.0103144	22.7	0.00401581	29.9	0.458915	55.3	0.617082							37.1
33.7	6.85397e-07	33.7	0.000227252	38.3	0.179044	38.3	0.203347	0.8	0.632372	0.632864	0.937587	0.0856853	33.7	0.190674	0.182362	0.692467	10.6	0.000248303	28.4	0.000470333	-2.3	0.28034	8	0.104939	11.7	2.29633e-05	7.41371e-06	0.404896					31.2	2.63944e-06	38.5	0.061707	23.1	0.00388407	30.3	0.214437	55.7	0.65042							37.5
34.1	1.72687e-05	34.1	0.000822624	38.6	0.208717	38.6	0.0661312	1.1	0.602654	0.424965	0.667555	0.0803545	34	0.0374229	0.00311338	0.0555126	11	0.000133961	28.8	0.00249178	-1.9	0.23483	8.3	0.192064	12.1	0.000423649	2.32149e-05	0.627719					31.5	8.97816e-06	38.9	0.0278973	23.5	0.000115874	30.7	0.0674148	56.1	0.564558							37.9
34.5	4.12988e-06	34.5	0.0210207	39	0.230374	39	0.0984134	1.5	0.995703	0.629169	0.608517	0.133302	34.4	0.0633926	0.0315702	0.218118	11.4	0.000507405	29.2	0.00299608	-1.5	0.395055	8.7	0.410808	12.5	0.000658551	2.47843e-05	0.718127					31.9	5.14013e-06	39.2	0.0260002	23.9	0.00622938	31.1	0.00682043	56.4	0.288084							38.3
34.8	4.25678e-06	34.8	0.0100073	39.4	0.449729	39.4	0.149585	1.9	0.479353	0.833962	0.677191	0.258978	34.8	0.229855	0.0734134	0.290934	11.7	0.000219213	29.5	0.00125067	-1.1	0.633267	9.1	0.342311	12.9	4.333e-05	3.80592e-05	0.117421					32.2	9.88615e-07	39.5	0.0337825	24.2	0.0165872	31.4	0.138015	56.8	0.0896154							38.6
35.2	6.69431e-06	35.2	0.0153538	39.8	0.788414	39.8	0.374493	2.3	0.282099	0.355941	0.989793	0.565601	35.2	0.223623	0.151285	0.656338	12.1	0.000141992	29.9	0.00146957	-0.8	0.908575	9.5	0.23718	13.3	0.000141014	5.14989e-06	0.296456					32.5	7.11524e-07	39.9	0.0385748	24.6	0.0181669	31.8	0.65322	57.2	0.0893379							39
35.6	7.53506e-06	35.6	0.00976285	40.2	0.869098	40.2	0.0365817	2.7	0.191591	0.204268	0.912783	0.359989	35.5	0.182939	0.320234	0.72858	12.5	0.000225121	30.3	0.00376948	-0.4	0.891135	9.8	0.286816	13.6	0.00181228	0.000209528	0.819309					32.9	1.4641e-06	40.2	0.114264	25	0.0252965	32.2	0.498587	57.6	0.60029							39.4
36	1.26153e-06	36	0.00178497	40.5	0.773636	40.5	0.105284	3	0.270606	0.143791	0.600725	0.32309	35.9	0.0592496	0.432916	0.737489	12.9	0.000218069	30.7	0.00511938	0	0.644754	10.2	0.128318	14	0.000282443	7.26871e-05	0.211372					33.2	2.62032e-05	40.5	0.09539	25.4	0.0523658	32.6	0.59444	58	0.241792							39.8
36.4	5.2674e-08	36.4	0.0022777	40.9	0.436303	40.9	0.374516	3.4	0.394773	0.067456	0.267247	0.174279	36.3	0.098627	0.681738	0.264043	13.3	0.000179111	31.1	0.0135511	0.4	0.66306	10.6	0.0930982	14.4	0.000137725	0.000185897	0.190595					33.5	1.92883e-05	40.8	0.0379078	25.8	0.0224812	33	0.942546	58.3	0.414458							40.2
36.7	1.56537e-07	36.7	0.0109497	41.3	0.511548	41.3	0.152429	3.8	0.260029	0.0397021	0.252258	0.226543	36.7	0.214537	0.227565	0.840296	13.6	0.000224457	31.4	0.00873172	0.8	0.488034	11	0.106375	14.8	1.1738e-05	2.72585e-05	0.0716578					33.9	3.71367e-05	41.2	0.0751678	26.1	0.0575065	33.3	0.69999	58.7	0.765955							40.5
37.1	6.10479e-06	37.1	0.0159296	41.7	0.198852	41.7	0.893	4.2	0.0687345	0.00643227	0.157197	0.334151	37.1	0.0750722	0.165319	0.488631	14	0.000385545	31.8	0.00649464	1.1	0.52641	11.4	0.109324	15.2	0.000642075	8.51896e-06	0.436052					34.2	7.0153e-05	41.5	0.0715821	26.5	0.0341695	33.7	0.877253	59.1	0.639042							40.9
37.5	8.20949e-07	37.5	0.0121088	42	0.0904384	42	0.95446	4.5	0.137156	0.011558	0.142557	0.152764	37.4	0.389609	0.300593	0.994676	14.4	0.000202081	32.2	0.00971996	1.5	0.255062	11.7	0.131734	15.5	5.2671e-05	0.000122059	0.142946					34.5	6.97248e-06	41.8	0.091913	26.9	0.0689714	34.1	0.907749	59.5	0.990091							41.3
37.9	4.17e-06	37.9	0.0158588	42.4	0.437778	42.4	0.631312	4.9	0.867078	0.0306878	0.0452587	0.0360184	37.8	0.543017	0.114311	0.633444	14.8	7.10886e-05	32.6	0.00693451	1.9	0.156886	12.1	0.239346	15.9	0.00106705	0.000187187	0.265296					34.9	1.15324e-05	42.2	0.10885	27.3	0.193009	34.5	0.641025	59.8	0.765775							41.7
38.3	2.65859e-06	38.3	0.0163045	42.8	0.739782	42.8	0.722102	5.3	0.784297	0.00316378	0.0141367	0.0388163	38.2	0.986758	0.41683	0.933333	15.2	0.000401603	33	0.00333139	2.3	0.117342	12.5	0.290944	16.3	7.85102e-05	2.03009e-05	0.201329					35.2	1.75588e-05	42.5	0.0985814	27.7	0.0464412	34.8	0.79748	60.2	0.718583							42
38.6	5.94171e-07	38.6	0.0278408	43.2	0.560536	43.2	0.257491	5.7	0.750007	0.00242089	0.00362636	0.0709276	38.6	0.924418	0.805156	0.521784	15.5	0.000461204	33.3	0.000338859	2.7	0.0965322	12.9	0.444165	16.7	0.000606885	4.74073e-07	0.665751					35.5	2.18007e-05	42.8	0.0708752	28	0.0543555	35.2	0.731007	60.6	0.0511236							42.4
39	2.29557e-06	39	0.189755	43.6	0.379094	43.6	0.621881	6.1	0.414663	0.00133835	0.0102144	0.00633689	39	0.880877	0.734281	0.0361691	15.9	5.50471e-05	33.7	0.000599372	3	0.0718941	13.3	0.734243	17	3.82965e-05	8.39972e-07	0.589221					35.9	6.68805e-05	43.2	0.194349	28.4	0.0409495	35.6	0.044754	61	0.201108							42.8
39.4	2.19197e-06	39.4	0.0308284	43.9	0.67819	43.9	0.449406	6.4	0.0870354	0.00656464	0.0768361	0.025433	39.3	0.84869	0.552856	0.0983938	16.3	1.93009e-05	34.1	0.00158128	3.4	0.143622	13.6	0.507666	17.4	1.66959e-05	8.8686e-07	0.468498					36.2	0.000486385	43.5	0.0705506	28.8	0.0306942	36	0.38184	61.4	0.289326							43.2
39.8	6.23394e-07	39.8	0.00845993	44.3	0.88204	44.3	0.204023	6.8	0.07326	0.0067994	0.0985867	0.0327942	39.7	0.465697	0.812523	0.281749	16.7	0.000217692	34.5	0.00421276	3.8	0.305558	14	0.183848	17.8	3.12561e-06	4.15009e-06	0.0820797					36.5	0.000434519	43.8	0.211871	29.2	0.022119	36.4	0.780555	61.7	0.390347							43.6
40.2	2.82058e-06	40.2	0.0145118	44.7	0.816158	44.7	0.888356	7.2	0.0292978	0.00445551	0.11198	0.0434275	40.1	0.445275	0.661029	0.926349	17	0.00023838	34.8	0.00640156	4.2	0.184377	14.4	0.111799	18.2	1.41335e-06	3.43271e-05	0.00851485					36.9	0.000541708	44.2	0.32424	29.5	0.0191125	36.7	0.0864095	62.1	0.412416							43.9
40.5	2.20611e-05	40.5	0.00252941	45.1	0.975968	45.1	0.25142	7.6	0.00181243	0.0006231	0.324971	0.0667522	40.5	0.097753	0.104366	0.264437	17.4	6.94024e-05	35.2	0.000649673	4.5	0.0604348	14.8	0.11781	18.6	6.76589e-07	0.000172155	0.00225038					37.2	0.00191924	44.5	0.305342	29.9	0.00808632	37.1	0.173049	62.5	0.556585							44.3
40.9	2.4811e-06	40.9	0.0117571	45.5	0.189929	45.5	0.202167	8	0.000132186	3.67971e-05	0.15198	0.0795628	40.8	0.524614	0.106884	0.659181	17.8	9.32071e-05	35.6	0.00139197	4.9	0.0213036	15.2	0.198484	18.9	3.9463e-07	3.68061e-05	0.00343519					37.5	0.000549247	44.8	0.242395	30.3	0.017421	37.5	0.0778055	62.9	0.609084							44.7
41.3	6.95104e-06	41.3	0.00569856	45.8	0.295016	45.8	0.501034	8.3	2.18757e-05	4.7746e-06	0.126151	0.285702	41.2	0.70413	0.197113	0.771139	18.2	0.000329796	36	0.00328467	5.3	0.00266287	15.5	0.145273	19.3	1.50567e-06	1.90757e-06	0.0424474					37.9	0.000419138	45.2	0.46407	30.7	0.0244209	37.9	0.733686	63.3	0.792408							45.1
41.7	2.06775e-06	41.7	0.0416221	46.2	0.553568	46.2	0.4015	8.7	8.23434e-05	5.63464e-06	0.0728841	0.32059	41.6	0.599804	0.149348	0.666479	18.6	0.00086414	36.4	0.000963418	5.7	0.00155973	15.9	0.114102	19.7	1.82326e-05	1.47089e-06	0.0722379					38.2	0.00035781	45.5	0.262523	31.1	0.0391059	38.3	0.774371	63.6	0.219864							45.5
42	2.57863e-07	42	0.0565847	46.6	0.481009	46.6	0.597946	9.1	0.000293359	2.85876e-05	0.0778484	0.493294	42	0.291867	0.0306481	0.982706	18.9	0.00216998	36.7	3.65515e-05	6.1	0.000679008	16.3	0.156597	20.1	2.92051e-06	2.39187e-05	0.040481					38.5	0.000101663	45.8	0.157283	31.4	0.0699717	38.6	0.313069	64	0.245802							45.8
42.4	1.82893e-07	42.4	0.016954	47	0.439638	47	0.72182	9.5	0.00219009	0.000291731	0.0329792	0.834399	42.4	0.546838	0.059793	0.617502	19.3	0.000560085	37.1	1.37307e-05	6.4	0.00250275	16.7	0.127051	20.5	0.0021	5.3514e-05	0.957791					38.9	0.00011044	46.2	0.340651	31.8	0.00120514	39	0.546206	64.4	0.781651							46.2
42.8	4.18472e-08	42.8	0.00685017	47.3	0.333522	47.3	0.333918	9.8	7.4607e-05	1.40993e-05	0.0267068	0.934607	42.7	0.249574	0.0285493	0.0202164	19.7	0.000172581	37.5	2.90878e-05	6.8	0.00245722	17	0.0838436	20.8	0.000846843	0.000424232	0.26827					39.2	0.000230731	46.5	0.248951	32.2	0.0386383	39.4	0.511001	64.8	0.713449							46.6
43.2	1.11918e-06	43.2	0.0731502	47.7	0.382833	47.7	0.139997	10.2	1.40868e-06	4.6985e-07	0.219433	0.531001	43.1	0.481943	0.343139	0.639806	20.1	1.15632e-05	37.9	0.000327007	7.2	0.00373292	17.4	0.0645508	21.2	0.000368499	0.000968226	0.126534					39.5	0.000442138	46.8	0.128159	32.6	0.0576379	39.8	0.561591	65.2	0.778028							47
43.6	3.21654e-06	43.6	0.0108171	48.1	0.838012	48.1	0.306607	10.6	5.24142e-07	1.00027e-07	0.233567	0.207958	43.5	0.742781	0.128341	0.348584	20.5	5.77927e-06	38.3	0.00281083	7.6	0.00592286	17.8	0.0498118	21.6	0.00323476	0.000741325	0.463089					39.9	0.001635	47.2	0.159157	33	0.079373	40.2	0.516843	65.5	0.994808							47.3
43.9	5.75897e-07	43.9	0.00289011	48.5	0.608799	48.5	0.722558	11	6.614e-06	4.88058e-06	0.357235	0.118627	43.9	0.555801	0.121723	0.0508109	20.8	4.87098e-05	38.6	0.00956095	8	0.00343359	18.2	0.0290809	22	0.00913001	0.00174307	0.581976					40.2	0.00107756	47.5	0.169012	33.3	0.0414931	40.5	0.637287	65.9	0.957404							47.7
44.3	2.34015e-09	44.3	0.00302604	48.9	0.231598	48.9	0.59872	11.4	0.000112012	8.51342e-05	0.649319	0.12386	44.2	0.753884	0.138346	0.138895	21.2	2.05438e-05	39	0.0174571	8.3	0.0065013	18.6	0.0649969	22.3	5.84758e-05	0.000358232	0.0482469					40.5	0.00124257	47.8	0.338653	33.7	0.127488	40.9	0.140925	66.3	0.953482							48.1
44.7	3.34292e-09	44.7	0.0143496	49.2	0.915488	49.2	0.775629	11.7	2.09262e-05	1.8149e-05	0.726975	0.0700497	44.6	0.594644	0.097092	0.444529	21.6	7.31449e-06	39.4	0.00824839	8.7	0.00260462	18.9	0.0389504	22.7	0.000776045	0.00151381	0.224778					40.8	0.000218416	48.2	0.47543	34.1	0.0552481	41.3	0.135411	66.7	0.384399							48.5
45.1	1.95723e-07	45.1	0.0126823	49.6	0.898524	49.6	0.880019	12.1	5.2513e-06	5.24731e-06	0.724614	0.0804902	45	0.610275	0.0350608	0.334461	22	7.62053e-05	39.8	0.0111498	9.1	0.00034037	19.3	0.0450613	23.1	0.00285861	0.00818026	0.230366					41.2	0.000167339	48.5	0.918101	34.5	0.0342973	41.7	0.464686	67	0.371129							48.9
45.5	9.79377e-07	45.5	0.00352721	50	0.818566	50	0.415116	12.5	0.000185363	0.000256465	0.459143	0.168395	45.4	0.647167	0.326999	0.36925	22.3	0.000143674	40.2	0.0102174	9.5	0.000188955	19.7	0.0325137	23.5	0.0153855	0.00556195	0.458503					41.5	0.000936092	48.8	0.890664	34.8	0.0111887	42	0.0429348	67.4	0.494523							49.2
45.8	2.93809e-06	45.8	0.00418795	50.4	0.605088	50.4	0.328141	12.9	0.0002657	0.000322711	0.689799	0.212317	45.8	0.23581	0.835834	0.671757	22.7	1.83869e-05	40.5	0.00181906	9.8	5.36731e-05	20.1	0.0147816	23.9	0.00091871	0.000495589	0.127715					41.8	0.00392546	49.2	0.870888	35.2	0.0122795	42.4	0.122239	67.8	0.218687							49.6
46.2	4.3381e-06	46.2	0.0274524	50.8	0.479833	50.8	0.670558	13.3	6.20717e-05	6.44919e-05	0.915642	0.374065	46.1	0.271479	0.72782	0.323803	23.1	8.20975e-05	40.9	0.000105949	10.2	9.85561e-05	20.5	0.0265637	24.2	0.0024894	0.000195107	0.279879					42.2	0.0229699	49.5	0.78641	35.6	0.011067	42.8	0.528675	68.2	0.224943							50
46.6	5.03306e-06	46.6	0.00435203	51.1	0.98591	51.1	0.421516	13.6	1.88395e-06	3.73274e-06	0.728461	0.364597	46.5	0.123217	0.779496	0.48142	23.5	5.44882e-05	41.3	1.79612e-06	10.6	0.000189317	20.8	0.0221329	24.6	0.000140376	0.000407417	0.360134					42.5	0.02146	49.8	0.686136	36	0.0286546	43.2	0.183496	68.6	0.148288							50.4
47	2.83958e-07	47	0.00122225	51.5	0.667885	51.5	0.349033	14	1.22188e-05	2.82858e-05	0.644086	0.357089	46.9	0.214499	0.582198	0.586177	23.9	1.34517e-06	41.7	0.00191143	11	0.000196431	21.2	0.0243773	25	0.000353587	0.000385475	0.159053					42.8	0.00669338	50.1	0.956593	36.4	0.0038488	43.6	0.169437	68.9	0.0892366							50.8
47.3	9.74858e-08	47.3	0.0117387	51.9	0.836703	51.9	0.954143	14.4	2.07692e-05	3.58881e-05	0.528401	0.140217	47.3	0.226411	0.912261	0.660041	24.2	2.98639e-05	42	0.000330955	11.4	8.1247e-05	21.6	0.00857756	25.4	0.000243778	0.00247202	0.0275815					43.2	0.0108609	50.5	0.632464	36.7	0.00119207	43.9	0.235678	69.3	0.282079							51.1
47.7	7.75008e-08	47.7	0.0553965	52.3	0.87802	52.3	0.766795	14.8	3.57459e-06	3.54072e-06	0.419356	0.0635322	47.6	0.696266	0.252177	0.284022	24.6	0.000497622	42.4	3.86797e-05	11.7	7.5637e-05	22	0.0141323	25.8	0.00703596	0.0332787	0.149359					43.5	0.0103073	50.8	0.765508	37.1	0.0121921	44.3	0.312351	69.7	0.406204							51.5
48.1	3.82923e-07	48.1	0.0301827	52.7	0.36403	52.7	0.351603	15.2	4.43081e-06	5.62875e-06	0.553725	0.746859	48	0.659392	0.569518	0.5311	25	0.000896115	42.8	0.000103699	12.1	6.15384e-05	22.3	0.0112945	26.1	0.00194846	0.102306	0.0441377					43.8	0.00700986	51.1	0.9513	37.5	0.0108626	44.7	0.930618	70.1	0.327543							51.9
48.5	1.4082e-06	48.5	0.0428193	53	0.54055	53	0.249638	15.5	1.07537e-06	1.05515e-06	0.989952	0.699579	48.4	0.623456	0.400907	0.958231	25.4	0.000417651	43.2	0.00364227	12.5	6.06642e-05	22.7	0.00350504	26.5	0.000114399	0.00308781	0.00980493					44.2	0.0236819	51.5	0.891039	37.9	0.0100488	45.1	0.468791	70.5	0.204503							52.3
48.9	2.97749e-06	48.9	0.584756	53.4	0.889064	53.4	0.15002	15.9	4.9451e-08	9.43461e-09	0.849235	0.940756	48.8	0.877438	0.794267	0.349049	25.8	7.84187e-05	43.6	0.017771	12.9	5.81864e-06	23.1	0.000780819	26.9	0.0019089	0.0140183	0.047304					44.5	0.0132883	51.8	0.350423	38.3	0.00351675	45.5	0.364649	70.8	0.115634							52.7
49.2	2.71824e-08	49.2	0.180891	53.8	0.702885	53.8	0.609146	16.3	1.48005e-07	7.22507e-08	0.88797	0.556503	49.2	0.744844	0.782888	0.923344	26.1	0.000107169	43.9	0.0213714	13.3	2.14551e-05	23.5	0.00144284	27.3	0.000359917	0.0578697	0.0115624					44.8	0.00421891	52.1	0.451282	38.6	0.0171902	45.8	0.624416	71.2	0.250142							53
49.6	9.00953e-08	49.6	0.301097	54.2	0.314936	54.2	0.0975604	16.7	6.3005e-05	5.9183e-05	0.841784	0.897549	49.5	0.649933	0.33564	0.482214	26.5	0.000423406	44.3	0.0031163	13.6	3.45071e-05	23.9	0.00596723	27.7	6.9348e-05	0.0133402	0.00760199					45.2	0.00373056	52.5	0.955928	39	0.00765413	46.2	0.673243	71.6	0.169973							53.4
50	2.27364e-08	50	0.845269	54.5	0.966489	54.5	0.738314	17	0.000254814	0.000239722	0.967828	0.62116	49.9	0.931217	0.0365399	0.374948	26.9	0.000429222	44.7	0.000135355	14	0.000111962	24.2	0.013209	28	0.00128839	0.00962125	0.0681815					45.5	0.0124718	52.8	0.982019	39.4	0.000442596	46.6	0.53546	72	0.156765							53.8
50.4	2.78904e-08	50.4	0.09706	54.9	0.322149	54.9	0.496253	17.4	4.21862e-06	6.84476e-06	0.934589	0.356188	50.3	0.951065	0.238521	0.34788	27.3	3.36712e-05	45.1	5.5647e-05	14.4	0.000282508	24.6	0.045856	28.4	0.0106091	0.00527323	0.280885					45.8	0.00912274	53.1	0.843485	39.8	0.00125282	47	0.851282	72.3	0.22006							54.2
50.8	6.43082e-07	50.8	0.00645218	55.3	0.72307	55.3	0.45346	17.8	0.000204666	0.000229121	0.995346	0.520571	50.7	0.579231	0.473163	0.778646	27.7	1.99066e-06	45.5	0.000681694	14.8	0.000316448	25	0.0186262	28.8	0.0126338	0.0471962	0.0955597					46.2	0.0252409	53.5	0.598877	40.2	0.000576654	47.3	0.668311	72.7	0.201757							54.5
51.1	1.09858e-07	51.1	0.036836	55.7	0.322062	55.7	0.785674	18.2	0.000111749	0.000125563	0.731738	0.302619	51.1	0.616477	0.78223	0.950131	28	1.5286e-06	45.8	0.000662156	15.2	0.000961869	25.4	0.0141579	29.2	0.000711314	0.0904344	0.00985224					46.5	0.0381393	53.8	0.816491	40.5	0.00136631	47.7	0.923474	73.1	0.2835							54.9
51.5	5.4981e-08	51.5	0.118986	56.1	0.975913	56.1	0.791024	18.6	0.000215219	0.000193331	0.329356	0.394852	51.4	0.747844	0.304993	0.741064	28.4	4.85164e-06	46.2	0.000477157	15.5	0.00186383	25.8	0.00868379	29.5	0.00381789	0.00802468	0.17922					46.8	0.00765712	54.1	0.748086	40.9	0.00411188	48.1	0.46466	73.5	0.582833							55.3
51.9	5.88185e-08	51.9	0.0637251	56.4	0.209045	56.4	0.574671	18.9	2.36164e-05	2.76397e-05	0.6441	0.440318	51.8	0.577613	0.339796	0.623824	28.8	0.00020683	46.6	0.00120362	15.9	0.0015691	26.1	0.00356316	29.9	0.000217952	0.00358534	0.0190562					47.2	0.000700367	54.5	0.90462	41.3	0.0136473	48.5	0.0840381	73.9	0.978188							55.7
52.3	1.67398e-07	52.3	0.0476428	56.8	0.655179	56.8	0.520019	19.3	0.000212063	0.000184125	0.810622	0.119077	52.2	0.268164	0.98195	0.951602	29.2	3.44972e-05	47	0.00230952	16.3	0.000704221	26.5	0.00193825	30.3	0.0014052	0.00233703	0.0409678					47.5	0.0112494	54.8	0.976113	41.7	0.016139	48.9	0.0610507	74.2	0.872894							56.1
52.7	8.50173e-08	52.7	0.0587805	57.2	0.557011	57.2	0.825771	19.7	0.000163907	0.000128108	0.934205	0.104994	52.6	0.99579	0.468078	0.846145	29.5	1.43438e-05	47.3	0.000625789	16.7	0.000370182	26.9	0.00179988	30.7	0.00555458	0.0903228	0.0512299					47.8	0.0618823	55.1	0.578986	42	0.024743	49.2	0.758951	74.6	0.945825
53	2.26269e-07	53	0.271565	57.6	0.53746	57.6	0.898461	20.1	4.64017e-05	0.000113551	0.444214	0.0409301	52.9	0.586816	0.79549	0.419408	29.9	1.4777e-05	47.7	3.26344e-05	17	8.95119e-05	27.3	0.00683122	31.1	0.00204943	0.104053	0.0448852					48.2	0.0111706	55.5	0.324337	42.4	0.00267314	49.6	0.0253397	75	0.989832
53.4	6.08194e-06	53.4	0.721707	58	0.663036	58	0.925882	20.5	0.00250346	0.00445105	0.322045	0.0802756	53.3	0.744078	0.482573	0.465927	30.3	9.54422e-06	48.1	0.000126625	17.4	1.30209e-06	27.7	0.00953623	31.4	0.00316506	0.00142701	0.46469					48.5	0.00893277	55.8	0.728224	42.8	0.00477164	50	0.0544909	75.4	0.558224
53.8	2.58272e-07	53.8	0.98189	58.3	0.963684	58.3	0.941248	20.8	4.28171e-05	0.000228251	0.197874	0.192782	53.7	0.390381	0.487141	0.604835	30.7	0.000129675	48.5	0.000448227	17.8	1.60563e-06	28	0.0134125	31.8	0.00149348	0.0140322	0.118469					48.8	0.126618	56.1	0.419054	43.2	0.0342806	50.4	0.0210825	75.8	0.9863
54.2	1.36988e-07	54.2	0.465975	58.7	0.747495	58.7	0.439272	21.2	2.05928e-05	7.40748e-05	0.216975	0.239115	54.1	0.558645	0.428094	0.154468	31.1	0.000293174	48.9	0.00280148	18.2	9.98629e-06	28.4	0.0422925	32.2	0.00226094	0.0246089	0.0938819					49.2	0.475474	56.5	0.536182	43.6	0.0422199	50.8	0.474097	76.1	0.921582
54.5	2.23415e-09	54.5	0.0167583	59.1	0.242391	59.1	0.363078	21.6	7.15537e-07	2.46181e-06	0.451985	0.0264138	54.5	0.964384	0.750628	0.796429	31.4	0.000489624	49.2	0.000969692	18.6	6.64473e-06	28.8	0.0128875	32.6	0.00431306	0.0110764	0.149417					49.5	0.161427	56.8	0.533464	43.9	0.00587806	51.1	0.636486	76.5	0.887601
54.9	5.69232e-09	54.9	0.0443843	59.5	0.936048	59.5	0.390674	22	8.21482e-06	1.65226e-05	0.276594	0.372704	54.8	0.834816	0.438445	0.646894	31.8	0.000624359	49.6	0.000127502	18.9	4.51123e-06	29.2	0.0239806	33	0.0101295	0.0112454	0.218788					49.8	0.133036	57.1	0.767129	44.3	0.0265984	51.5	0.148534	76.9	0.871607
55.3	3.62345e-08	55.3	0.0442588	59.8	0.983648	59.8	0.759229	22.3	3.6987e-05	7.14247e-05	0.189091	0.796566	55.2	0.266935	0.122447	0.602474	32.2	9.93847e-05	50	0.00176465	19.3	2.26996e-05	29.5	0.0379287	33.3	0.00435671	0.000871534	0.51239					50.1	0.382211	57.5	0.866061	44.7	0.0466438	51.9	0.151011	77.3	0.89697
55.7	1.2067e-08	55.7	0.239387	60.2	0.998189	60.2	0.362362	22.7	1.22059e-05	2.56459e-05	0.0844986	0.834703	55.6	0.341834	0.541795	0.979895	32.6	0.000316878	50.4	0.00252606	19.7	0.000102711	29.9	0.00580536	33.7	0.00104691	0.0115352	0.062693					50.5	0.2179	57.8	0.991099	45.1	0.0806784	52.3	0.0399425	77.7	0.98145
56.1	7.29481e-09	56.1	0.187966	60.6	0.985885	60.6	0.799186	23.1	9.01705e-06	1.81618e-05	0.515625	0.608367	56	0.397156	0.257904	0.572834	33	0.000418946	50.8	0.00306888	20.1	0.0019773	30.3	0.00237531	34.1	0.0141805	0.0178504	0.236297					50.8	0.351079	58.1	0.893753	45.5	0.0240887	52.7	0.465272	78	0.961035
56.4	1.37816e-07	56.4	0.0571814	61	0.884797	61	0.215664	23.5	5.26603e-05	7.27312e-05	0.433114	0.397534	56.3	0.751097	0.183012	0.790453	33.3	0.000254401	51.1	0.00868736	20.5	0.0028938	30.7	0.00174183	34.5	0.0193131	0.163133	0.102043					51.1	0.588881	58.5	0.89891	45.8	0.0254155	53	0.69019	78.4	0.738145
56.8	7.93009e-08	56.8	0.0993723	61.4	0.0542839	61.4	0.270521	23.9	2.51449e-06	4.26328e-06	0.587518	0.158845	56.7	0.830107	0.160726	0.788178	33.7	0.000351842	51.5	0.0148195	20.8	0.00127422	31.1	0.00740356	34.8	0.0555172	0.166285	0.444997					51.5	0.91087	58.8	0.473541	46.2	0.0033728	53.4	0.524287
57.2	7.21307e-07	57.2	0.273245	61.7	0.824406	61.7	0.635295	24.2	8.25006e-05	9.33837e-05	0.799712	0.426885	57.1	0.747585	0.230034	0.694602	34.1	0.00101781	51.9	0.0260071	21.2	0.000251307	31.4	0.00833463	35.2	0.0684922	0.0441827	0.5847					51.8	0.303843	59.1	0.64937	46.6	0.00149629	53.8	0.22256
57.6	9.55488e-06	57.6	0.0483181	62.1	0.820502	62.1	0.495851	24.6	0.000146859	9.97323e-05	0.748765	0.357067	57.5	0.581184	0.27655	0.660091	34.5	0.000798854	52.3	0.0326157	21.6	5.64882e-05	31.8	0.00399688	35.6	0.056512	0.0685674	0.552582					52.1	0.312791	59.4	0.822732	47	0.00114063	54.2	0.326354
58	2.41341e-07	58	0.0258636	62.5	0.425241	62.5	0.69986	25	6.18366e-05	3.00291e-05	0.81191	0.0575452	57.9	0.615109	0.375742	0.726788	34.8	0.00344594	52.7	0.0210391	22	7.55581e-05	32.2	0.00123822	36	0.0273135	0.0267068	0.443039					52.5	0.430701			47.3	0.00102681	54.5	0.0659614
58.3	5.13588e-07	58.3	0.149593	62.9	0.561168	62.9	0.524529	25.4	2.07049e-06	1.74962e-06	0.682045	0.0338731	58.2	0.448077	0.479985	0.923126	35.2	0.00375489	53	0.0143769	22.3	9.57226e-05	32.6	0.0097998	36.4	0.0278493	0.0226254	0.800588					52.8	0.375434			47.7	0.00579256	54.9	0.174953
58.7	7.37756e-06	58.7	0.0841263	63.3	0.412762	63.3	0.778495	25.8	8.55792e-06	1.11675e-05	0.448299	0.0237302	58.6	0.263538	0.0292286	0.823941	35.6	0.00148622	53.4	0.0115507	22.7	6.07284e-05	33	0.0254541	36.7	0.0139114	0.0778724	0.093465					53.1	0.274301			48.1	0.0186585	55.3	0.435791
59.1	1.32098e-05	59.1	0.0339396	63.6	0.464795	63.6	0.433832	26.1	2.97762e-05	3.59362e-05	0.697323	0.0280631	59	0.283738	0.0476485	0.495054	36	0.000452805	53.8	0.00903885	23.1	3.47716e-05	33.3	0.0235858	37.1	0.0324241	0.068789	0.159325					53.5	0.315152			48.5	0.00105666	55.7	0.352228
59.5	3.46925e-05	59.5	0.192389	64	0.545327	64	0.69485	26.5	0.000226348	0.00016053	0.64115	0.0181814	59.4	0.519528	0.603127	0.493171	36.4	2.67538e-05	54.2	0.0138692	23.5	0.000222215	33.7	0.0172897	37.5	0.00066693	0.117564	0.00969929					53.8	0.268704			48.9	0.0200086	56.1	0.728344
59.8	7.4772e-07	59.8	0.263007	64.4	0.130032	64.4	0.795081	26.9	7.6683e-07	1.06469e-06	0.820938	0.0104654	59.8	0.48947	0.757079	0.239181	36.7	2.64042e-06	54.5	0.0134445	23.9	0.000306189	34.1	0.00697769	37.9	0.00296515	0.00395599	0.253611					54.1	0.301001			49.2	0.0211367	56.4	0.147218
60.2	5.17483e-09	60.2	0.164293	64.8	0.8153	64.8	0.406292	27.3	0.000475689	0.000721206	0.619581	0.173498	60.1	0.633145	0.645848	0.539007	37.1	1.86842e-06	54.9	0.00610553	24.2	0.000262498	34.5	0.00391721	38.3	0.000746214	0.0181284	0.104674					54.5	0.226158			49.6	0.0191756	56.8	0.700995
60.6	1.51588e-08	60.6	0.510134	65.2	0.932524	65.2	0.832262	27.7	6.39148e-06	2.41101e-05	0.793898	0.086602	60.5	0.956688	0.305347	0.732144	37.5	3.41778e-05	55.3	0.00168653	24.6	0.00065037	34.8	0.00225516	38.6	0.00224249	0.129219	0.0263085					54.8	0.287538			50	0.0723048	57.2	0.761462
61	2.21045e-07	61	0.109304	65.5	0.495324	65.5	0.184466	28	2.93817e-05	2.6027e-05	0.521555	0.134256	60.9	0.891524	0.108105	0.834462	37.9	6.242e-05	55.7	0.00141373	25	0.00180564	35.2	0.0029044	39	0.0857541	0.423248	0.170522					55.1	0.209921			50.4	0.067185	57.6	0.876814
61.4	3.19995e-08	61.4	0.107829	65.9	0.582061	65.9	0.79314	28.4	0.000429273	0.000504162	0.575144	0.290421	61.3	0.735984	0.363792	0.728912	38.3	4.6089e-07	56.1	0.00670379	25.4	0.00360885	35.6	0.0120613	39.4	0.00332678	0.203202	0.0119661					55.5	0.265312			50.8	0.0775189	58	0.695888
61.7	4.08162e-07	61.7	0.283004	66.3	0.771663	66.3	0.396989	28.8	1.97012e-05	5.97003e-05	0.405587	0.127883	61.6	0.212919	0.0396474	0.289585	38.6	3.38624e-06	56.4	0.00977262	25.8	0.00272058	36	0.00748384	39.8	0.00359168	0.591179	0.00628341					55.8	0.268504			51.1	0.105708	58.3	0.228934
62.1	5.2819e-06	62.1	0.51769	66.7	0.678314	66.7	0.703388	29.2	0.00119135	0.000832673	0.838751	0.0926497	62	0.0583627	0.342069	0.103425	39	7.88476e-05	56.8	0.00968339	26.1	0.00235682	36.4	0.00661418	40.2	0.0446405	0.250239	0.162839					56.1	0.177274			51.5	0.0877347	58.7	0.196308
62.5	7.59868e-06	62.5	0.932845	67	0.466139	67	0.974633	29.5	0.00107449	0.000877746	0.96105	0.179289	62.4	0.735656	0.115385	0.241014	39.4	5.66486e-05	57.2	0.00419819	26.5	0.00225337	36.7	0.00784365	40.5	0.000267245	0.144853	0.00447534					56.5	0.115354			51.9	0.0726986	59.1	0.6893
62.9	1.90019e-07	62.9	0.330959	67.4	0.0107775	67.4	0.721278	29.9	0.000577399	0.000579853	0.768843	0.0778282	62.8	0.614372	0.28128	0.48192	39.8	0.000189689	57.6	0.000973819	26.9	0.00397178	37.1	0.0265017	40.9	0.00667237	0.0486428	0.112192					56.8	0.0761923			52.3	0.636363	59.5	0.413271
63.3	3.74563e-07	63.3	0.0667397	67.8	0.203975	67.8	0.46772	30.3	0.000241494	0.000435469	0.0967895	0.0994813	63.2	0.909081	0.362395	0.410029	40.2	0.000458493	58	0.00116639	27.3	0.00377116	37.5	0.0198242	41.3	0.0178013	0.155129	0.10455					57.1	0.0488413			52.7	0.304102	59.8	0.219201
63.6	4.77614e-08	63.6	0.146286	68.2	0.438779	68.2	0.341423	30.7	0.000473344	0.00070259	0.427497	0.104033	63.5	0.838836	0.146921	0.711533	40.5	0.000166108	58.3	0.000123987	27.7	0.00439963	37.9	0.0134166	41.7	0.000111803	0.151631	0.00252576					57.5	0.0507014			53	0.11648	60.2	0.910818
64	1.66276e-06	64	0.195473	68.6	0.154318	68.6	0.792169	31.1	0.000230245	0.000436865	0.560514	0.310034	63.9	0.656537	0.0175119	0.715343	40.9	5.93344e-05	58.7	2.82197e-05	28	0.00306765	38.3	0.035179	42	0.139572	0.0893895	0.454824					57.8	0.0724207			53.4	0.164391	60.6	0.814642
64.4	5.56095e-07	64.4	0.315545	68.9	0.225872	68.9	0.418917	31.4	3.50651e-06	9.30519e-06	0.395389	0.044019	64.3	0.83075	0.14776	0.0893399	41.3	0.000136064	59.1	8.72279e-05	28.4	0.00215922	38.6	0.0283072	42.4	0.0128812	0.141461	0.157819					58.1	0.0311213			53.8	0.10925	61	0.227335
64.8	2.80855e-06	64.8	0.579261	69.3	0.702446	69.3	0.79281	31.8	1.41358e-05	1.81214e-05	0.100606	0.0143863	64.7	0.841378	0.07924	0.0797663	41.7	0.000120434	59.5	0.000440611	28.8	0.00268333	39	0.0601722	42.8	0.0893197	0.542524	0.271637					58.4	0.032747			54.2	0.0369309	61.4	0.152025
65.2	1.86223e-05	65.2	0.597714	69.7	0.574524	69.7	0.403654	32.2	6.51853e-07	2.19691e-06	0.471908	0.00456454	65	0.751582	0.0272859	0.268083	42	0.00097799	59.8	0.000354476	29.2	0.00205918	39.4	0.0441835	43.2	0.226078	0.898426	0.085705					58.8	0.0752446			54.5	0.00879338	61.7	0.197142
65.5	0.000294483	65.5	0.645388					32.6	1.32684e-05	1.59372e-05	0.329373	0.0498398	65.4	0.717416	0.125346	0.0504716	42.4	0.00112219	60.2	0.00809531	29.5	0.000704987	39.8	0.0180183	43.6	0.176904	0.791097	0.21945					59.1	0.10628			54.9	0.0528432	62.1	0.0685109
65.9	9.06055e-05	65.9	0.867139					33	9.06084e-06	6.73079e-06	0.745005	0.0568185	65.8	0.812295	0.375654	0.203849	42.8	0.000406277	60.6	0.00730713	29.9	0.000735029	40.2	0.036441	43.9	0.0553199	0.501025	0.147574					59.4	0.151187			55.3	0.00612551	62.5	0.318301
66.3	2.28253e-05	66.3	0.372014					33.3	0.000252231	0.000167849	0.513224	0.00400019	66.2	0.502041	0.050351	0.561565	43.2	0.000413579	61	0.00987583	30.3	0.000891276	40.5	0.0257513	44.3	0.514755	0.95638	0.414784					59.8	0.0777564			55.7	0.00234956	62.9	0.165619
66.7	2.47573e-06	66.7	0.36635					33.7	0.000578568	0.000801599	0.968109	0.0679895	66.6	0.41084	0.583563	0.992876	43.6	0.000130277	61.4	0.0103566	30.7	0.00257871	40.9	0.0248859	44.7	0.0234355	0.835618	0.0375705					60.1	0.0407598			56.1	0.0419575	63.3	0.612476
								34.1	0.00171496	0.00193449	0.67188	0.298043	66.9	0.639136	0.996961	0.102094	43.9	0.000116021	61.7	0.00727591	31.1	0.000706232	41.3	0.0128403	45.1	0.00286789	0.557181	0.00386483					60.4	0.0302894			56.4	0.126837	63.6	0.774396
								34.5	0.000540187	0.000643669	0.422454	0.228835	67.3	0.105209	0.259978	0.510467	44.3	5.03307e-05	62.1	0.00583207	31.4	0.000359293	41.7	0.0494749	45.5	0.346209	0.544502	0.556598					60.8	0.0421536			56.8	0.0501931	64	0.787748
								34.8	0.000260873	0.000181269	0.603086	0.0721333	67.7	0.402033	0.566351	0.656694	44.7	0.000149157	62.5	0.00510025	31.8	0.000714048	42	0.100686	45.8	0.164748	0.735241	0.23038					61.1	0.0115521			57.2	0.0024734	64.4	0.962435
								35.2	0.000262841	0.00015779	0.966406	0.0893374	68.1	0.961315	0.362156	0.848988	45.1	7.35217e-05	62.9	0.00291905	32.2	0.00190982	42.4	0.0371098	46.2	0.133367	0.350274	0.409302					61.4	0.0126239			57.6	0.00341327	64.8	0.682701
								35.6	6.4485e-05	0.000122385	0.126675	0.213823	68.4	0.358313	0.230339	0.859051	45.5	0.000323225	63.3	0.00158504	32.6	0.00122801	42.8	0.016722	46.6	0.192384	0.580157	0.290142					61.8	0.0164258			58	0.0305068	65.2	0.596881
								36	0.000323059	0.000454076	0.150133	0.947157	68.8	0.037885	0.2588	0.8238	45.8	0.000640281	63.6	0.00108575	33	0.00447301	43.2	0.0338193	47	0.0745588	0.846403	0.0395938					62.1	0.0625005			58.3	0.00234937	65.5	0.105451
								36.4	0.00256914	0.00436837	0.562329	0.349147	69.2	0.0509327	0.0779729	0.360265	46.2	0.000220862	64	6.81959e-05	33.3	0.0119722	43.6	0.0407178	47.3	0.00631118	0.404174	0.00035449					62.4	0.0593536			58.7	0.176868	65.9	0.252168
								36.7	0.00193443	0.00447224	0.520686	0.129393	69.6	0.0197124	0.0951534	0.225387	46.6	6.47682e-05	64.4	2.44541e-05	33.7	0.0165982	43.9	0.0726359	47.7	0.0335407	0.982009	0.0176794					62.8	0.0290544			59.1	0.120245	66.3	0.0709803
								37.1	0.00109537	0.00161428	0.679504	0.413804	70	0.160882	0.328706	0.188363	47	7.05202e-07	64.8	0.000574897	34.1	0.0140684	44.3	0.0392097	48.1	0.626791	0.327876	0.209798					63.1	0.0361514			59.5	0.604552	66.7	0.045383
								37.5	0.000383445	0.000621183	0.638413	0.626529	70.3	0.410492	0.571736	0.335078	47.3	1.61335e-06	65.2	0.00496827	34.5	0.0163775	44.7	0.0248218	48.5	0.492712	0.783205	0.361127					63.4	0.0230641			59.8	0.189768	67	0.0117448
								37.9	0.00124351	0.00389941	0.24956	0.516418	70.7	0.978906	0.558488	0.228403	47.7	9.72417e-06	65.5	0.00379442	34.8	0.006599	45.1	0.0429828	48.9	0.0690427	0.758703	0.0728235					63.8	0.0308819			60.2	0.0660786	67.4	0.0820049
								38.3	0.0013316	0.00724892	0.115186	0.400258	71.1	0.651759	0.271363	0.115475	48.1	0.000152419	65.9	0.00504503	35.2	0.00358226	45.5	0.0831315	49.2	0.0790081	0.905431	0.0918055					64.1	0.0651344			60.6	0.10643	67.8	0.387347
								38.6	0.00056615	0.00465744	0.244196	0.184502	71.5	0.959311	0.0473277	0.0145358	48.5	3.58562e-05	66.3	0.00952978	35.6	0.00638874	45.8	0.0111294	49.6	0.0152723	0.161573	0.103499					64.4	0.0256783			61	0.139277	68.2	0.608048
								39	3.59229e-05	0.00137772	0.176474	0.176212	71.9	0.797173	0.136281	0.0202914	48.9	8.61642e-05	66.7	0.00520961	36	0.00557841	46.2	0.0128223	50	0.00439371	0.0439176	0.116432					64.8	0.0770003			61.4	0.143871	68.6	0.605593
								39.4	0.00155058	0.00331574	0.421836	0.162038	72.2	0.681119	0.673684	0.0701513	49.2	0.000128812	67	0.00633396	36.4	0.00710421	46.6	0.0327697	50.4	7.50088e-05	0.00769147	0.0106323					65.1	0.602351			61.7	0.0763254	68.9	0.954729
								39.8	0.00132093	0.00198335	0.651265	0.0738146	72.6	0.232017	0.88259	0.0323371	49.6	0.000844491	67.4	0.00237453	36.7	0.00825916	47	0.0279719	50.8	0.551139	0.410094	0.97061					65.4	0.160303			62.1	0.010884	69.3	0.551923
								40.2	0.00273645	0.0159227	0.101613	0.0499317	73	0.61148	0.840145	0.0554032	50	0.000108024	67.8	0.000654063	37.1	0.00496883	47.3	0.0520141	51.1	0.214139	0.786445	0.328633					65.8	0.594407			62.5	0.0113726	69.7	0.359358
								40.5	0.006548	0.0250458	0.0686324	0.124497	73.4	0.594872	0.868722	0.238115	50.4	9.69358e-05	68.2	0.000751609	37.5	0.00174536	47.7	0.0469032	51.5	0.0817144	0.841664	0.125918					66.1	0.506581			62.9	0.0392172	70.1	0.223568
								40.9	0.02246	0.0635327	0.207808	0.0930085	73.7	0.99095	0.667757	0.222172	50.8	0.000429821	68.6	0.000404043	37.9	0.00129006	48.1	0.0358899	51.9	0.0682502	0.825659	0.0373002					66.4	0.329484			63.3	0.404842	70.5	0.23701
								41.3	0.00546224	0.0362776	0.135804	0.0498823	74.1	0.697924	0.498737	0.108298	51.1	0.000156109	68.9	0.000344428	38.3	0.000638834	48.5	0.0342539	52.3	0.677755	0.558704	0.86651					66.8	0.170689			63.6	0.401566	70.8	0.194269
								41.7	0.00167919	0.00359423	0.200888	0.176922	74.5	0.863302	0.517984	0.302393	51.5	0.000143912	69.3	0.000671445	38.6	0.000263461	48.9	0.032287	52.7	0.0768432	0.342818	0.018958					67.1	0.190829			64	0.269076	71.2	0.575936
								42	0.00254337	0.0216522	0.14236	0.41758	74.9	0.666547	0.836881	0.278747	51.9	7.04412e-05	69.7	0.000384296	39	0.00245087	49.2	0.0287536	53	0.0342807	0.868399	0.0532032					67.4	0.552935			64.4	0.638847	71.6	0.649813
								42.4	0.00264675	0.019642	0.220117	0.677055	75.3	0.673542	0.235682	0.663283	52.3	0.000306493	70.1	0.00226283	39.4	0.00909942	49.6	0.0350343	53.4	0.0789479	0.500672	0.142326					67.7	0.378123			64.8	0.0748833	72	0.1895
								42.8	0.00345081	0.00804676	0.472314	0.87209	75.6	0.964795	0.0965195	0.889864	52.7	0.000846087	70.5	0.00195415	39.8	0.0065585	50	0.143405	53.8	0.271702	0.276277	0.667467					68.1	0.436174			65.2	0.0910392	72.3	0.747879
								43.2	0.000965165	0.00500424	0.356362	0.0667045	76	0.526028	0.114553	0.904347	53	0.000446809	70.8	0.00302194	40.2	0.00375776	50.4	0.369327	54.2	0.854806	0.654015	0.818111					68.4	0.468655			65.5	0.189216	72.7	0.998764
								43.6	0.00570182	0.0384274	0.185306	0.274955	76.4	0.364638	0.259611	0.893609	53.4	0.00103432	71.2	0.00121678	40.5	0.0030803	50.8	0.206223	54.5	0.213514	0.0809766	0.918999									65.9	0.788673	73.1	0.829021
								43.9	0.00509069	0.0192349	0.0365363	0.731049	76.8	0.744384	0.379191	0.754702	53.8	0.00053685	71.6	0.00236386	40.9	0.00275465	51.1	0.17487	54.9	0.00311998	0.0298714	0.229432									66.3	0.972769	73.5	0.327019
								44.3	0.0012432	0.0098083	0.0218598	0.348333	77.1	0.437125	0.901385	0.108938	54.2	0.000325383	72	0.00355142	41.3	0.00239537	51.5	0.121994	55.3	0.0826095	0.146176	0.634702									66.7	0.893232	73.9	0.00796668
								44.7	0.000940517	0.00383649	0.129929	0.32685	77.5	0.892216	0.529912	0.422803	54.5	0.000289644			41.7	2.10583e-05	51.9	0.0970223	55.7	0.0663485	0.215568	0.283671									67	0.563148	74.2	0.898679
								45.1	0.00368482	0.0183571	0.112463	0.538029	77.9	0.582845	0.836132	0.230725	54.9	0.00033844			42	0.000119689	52.3	0.0670837	56.1	0.00540978	0.270434	0.0342305									67.4	0.275619	74.6	0.204304
								45.5	0.000838343	0.00181523	0.469083	0.344813	78.3	0.815539	0.504261	0.565873	55.3	0.000359366			42.4	0.000632633	52.7	0.0144172	56.4	0.805063	0.533892	0.865459									67.8	0.0349688	75	0.316624
								45.8	0.00649744	0.0579182	0.0245957	0.379625	78.7	0.761918	0.297005	0.764938	55.7	0.000189127			42.8	0.000445354	53	0.0799083	56.8	0.259552	0.589747	0.377681									68.2	0.860135	75.4	0.372253
								46.2	0.00741478	0.0413795	0.111092	0.466381	79	0.851969	0.608737		56.1	1.05183e-05			43.2	0.00119166	53.4	0.0485951	57.2	0.694847	0.366282	0.898312									68.6	0.974935
								46.6	0.0222024	0.070439	0.188381	0.907865	79.4	0.65978	0.415785		56.4	1.07181e-05			43.6	0.00185751	53.8	0.0437081	57.6	0.0401804	0.292063	0.268453									68.9	0.927415
								47	0.0140532	0.0471847	0.102779	0.643091	79.8	0.815408	0.344107		56.8	3.55845e-07			43.9	0.0280293	54.2	0.208107	58	0.185619	0.626413	0.516456									69.3	0.0687604
								47.3	0.00449197	0.00965634	0.446904	0.538076	80.2	0.795516	0.217666		57.2	6.32666e-05			44.3	0.0425094	54.5	0.431746	58.3	0.772437	0.446243	0.742092									69.7	0.0500552
								47.7	0.0374064	0.0674918	0.556524	0.767919	80.5	0.607507	0.142028		57.6	0.00066896			44.7	0.0533207	54.9	0.409022	58.7	0.794394	0.65684	0.512407									70.1	0.398031
								48.1	0.0500783	0.11402	0.322162	0.391355	80.9	0.849904	0.297217		58	0.00026051			45.1	0.0227959	55.3	0.178065	59.1	0.342693	0.0831854	0.764576									70.5	0.624958
								48.5	0.0268952	0.0616507	0.390533	0.317469	81.3	0.436568	0.240546		58.3	6.11908e-05			45.5	0.044646	55.7	0.160386	59.5	0.0654779	0.222219	0.283429									70.8	0.595079
								48.9	0.01111	0.00965498	0.760918	0.428096	81.7	0.0947872	0.0142033		58.7	0.000239062			45.8	0.0541394	56.1	0.205063	59.8	0.0833853	0.0410526	0.687291									71.2	0.380709
								49.2	0.0166364	0.0226256	0.58711	0.150458					59.1	0.000391327			46.2	0.0560912	56.4	0.472125	60.2	0.00385371	0.00560658	0.71433									71.6	0.865906
								49.6	0.035956	0.060725	0.39194	0.1751					59.5	0.000111772			46.6	0.0122725	56.8	0.981124	60.6	0.638765	0.0196428	0.00561387									72	0.398937
								50	0.0381431	0.0587126	0.592428	0.26038					59.8	0.000472225			47	0.0089766	57.2	0.730636	61	0.283495	0.0857222	0.76038									72.3	0.171406
								50.4	0.00652705	0.029838	0.130852	0.440815					60.2	0.000390774			47.3	0.0137257	57.6	0.377263	61.4	0.178659	0.956306	0.211885									72.7	0.795512
								50.8	0.0106989	0.03162	0.157688	0.324004					60.6	0.00131572			47.7	0.00120609	58	0.335719	61.7	0.46711	0.644541	0.686252									73.1	0.0498456
								51.1	0.0112206	0.026846	0.256219	0.124981					61	0.000716849			48.1	0.00423405	58.3	0.99571	62.1	0.689051	0.72547	0.924874									73.5	0.771812
								51.5	0.00757963	0.0167467	0.399658	0.189762					61.4	0.000302971			48.5	0.00748609	58.7	0.849621	62.5	0.620219	0.524921	0.305073									73.9	0.455288
								51.9	0.0213739	0.0170655	0.831922	0.818225					61.7	0.00148054			48.9	0.0195751	59.1	0.354802	62.9	0.914741	0.16729	0.24682									74.2	0.700029
								52.3	0.0262165	0.0170499	0.682438	0.666537					62.1	0.0019997			49.2	0.00105433	59.5	0.537287	63.3	0.996258	0.312499	0.519362									74.6	0.484352
								52.7	0.0810485	0.0820467	0.966319	0.977144					62.5	0.00228795			49.6	0.00546337	59.8	0.862217	63.6	0.791265	0.145499	0.291318									75	0.194179
								53	0.0670395	0.0605954	0.812572	0.71219					62.9	0.000195577			50	0.00663869	60.2	0.297829	64	0.91805	0.791602	0.785503									75.4	0.205112
								53.4	0.0742632	0.0455122	0.541847	0.789524					63.3	0.00018418			50.4	0.00895096	60.6	0.318359	64.4	0.591965	0.249553	0.186053									75.8	0.794904
								53.8	0.124335	0.0768122	0.576234	0.845566					63.6	5.50699e-05			50.8	0.0113291	61	0.274271	64.8	0.70946	0.292518	0.328464									76.1	0.958303
								54.2	0.217112	0.167172	0.751115	0.733679					64	9.14091e-06			51.1	0.0260779	61.4	0.407887	65.2	0.702873	0.333151	0.82115									76.5	0.228932
								54.5	0.100952	0.185364	0.47403	0.568809					64.4	1.11772e-06			51.5	0.014368	61.7	0.384622	65.5	0.96424	0.807832	0.940731									76.9	0.0569663
								54.9	0.0836101	0.150926	0.531842	0.37827					64.8	5.05291e-06			51.9	0.0311964	62.1	0.440253	65.9	0.156525	0.194008	0.802873									77.3	0.121715
								55.3	0.0975421	0.078709	0.804821	0.696092					65.2	2.72966e-05			52.3	0.0214575	62.5	0.757513	66.3	0.204351	0.391194	0.57469									77.7	0.322583
								55.7	0.434697	0.0689612	0.33834	0.882105					65.5	0.000105063			52.7	0.0464721	62.9	0.770612	66.7	0.58785	0.367926	0.121233									78	0.658145
								56.1	0.49612	0.153739	0.29518	0.598488					65.9	0.000210691			53	0.023852	63.3	0.783617	67	0.329789	0.934148	0.311631									78.4	0.174978
								56.4	0.434325	0.0741603	0.319131	0.755187					66.3	0.000397154			53.4	0.036824	63.6	0.812368	67.4	0.76342	0.224528	0.238026									78.8	0.0439873
								56.8	0.188928	0.0221566	0.123682	0.298677					66.7	0.000823395			53.8	0.0550094	64	0.950455	67.8	0.608563	0.12228	0.494059									79.2	0.683457
								57.2	0.267293	0.0146553	0.146206	0.583927					67	0.000412792			54.2	0.0508963	64.4	0.884522	68.2	0.493443	0.180624	0.582501									79.5	0.241252
								57.6	0.495115	0.0823238	0.187322	0.740201					67.4	5.99238e-05			54.5	0.127215	64.8	0.928339	68.6	0.851351	0.72978	0.961417									79.9	0.0639698
								58	0.59543	0.0689145	0.204013	0.916301					67.8	3.46951e-07			54.9	0.122987	65.2	0.734182	68.9	0.582764	0.924414	0.502908									80.3	0.15007
								58.3	0.773801	0.0822594	0.18735	0.808506					68.2	4.4748e-08			55.3	0.701822	65.5	0.628411	69.3	0.635409	0.0603263	0.0619087									80.7	0.528665
								58.7	0.870543	0.157265	0.223097	0.89916					68.6	2.63457e-07			55.7	0.856023	65.9	0.780249	69.7	0.840311	0.196657	0.1827									81.1	0.865964
								59.1	0.466806	0.171201	0.42407	0.42301					68.9	5.80626e-07			56.1	0.593908	66.3	0.598811	70.1	0.947825	0.262289	0.245531									81.4	0.756246
								59.5	0.724334	0.269679	0.227671	0.353999					69.3	2.02749e-06			56.4	0.158061	66.7	0.771966	70.5	0.718939	0.353574	0.200465									81.8	0.15225
								59.8	0.922081	0.0713629	0.100156	0.476536					69.7	2.52366e-06			56.8	0.0813247	67	0.791331	70.8	0.420321	0.12252	0.319773									82.2	0.175991
								60.2	0.563298	0.0853844	0.152452	0.349026					70.1	9.23009e-05			57.2	0.27079	67.4	0.489205	71.2	0.407098	0.122506	0.0334269									82.6	0.868838
								60.6	0.521127	0.0781077	0.165217	0.341407					70.5	1.14812e-05			57.6	0.313004	67.8	0.85343	71.6	0.325465	0.127424	0.574516									83	0.898812
								61	0.594999	0.187788	0.396495	0.805629					70.8	4.16149e-06			58	0.35241	68.2	0.744776	72	0.598811	0.429911	0.234294
								61.4	0.487798	0.058381	0.36539	0.530187					71.2	2.06137e-05			58.3	0.303703	68.6	0.848534	72.3	0.271463	0.0751201	0.487735
								61.7	0.648037	0.0302869	0.230714	0.156615					71.6	4.57733e-05			58.7	0.313268	68.9	0.81904	72.7	0.500606	0.028294	0.47168
								62.1	0.474568	0.0733131	0.415758	0.919414					72	0.000124121			59.1	0.3313	69.3	0.799775	73.1	0.106959	0.0386919	0.882847
								62.5	0.696793	0.293155	0.668939	0.577742					72.3	0.000752313			59.5	0.0539798	69.7	0.188206	73.5	0.547493	0.16816	0.0286678
								62.9	0.62875	0.176813	0.490254	0.947831					72.7	0.00051414			59.8	0.413425	70.1	0.353106	73.9	0.282996	0.0708459	0.316262
								63.3	0.225219	0.0515161	0.532808	0.222102					73.1	0.000803952			60.2	0.353347	70.5	0.546535	74.2	0.906017	0.832371	0.939123
								63.6	0.316873	0.0322422	0.259013	0.0610698					73.5	0.000599216			60.6	0.0143992	70.8	0.50453	74.6	0.75703	0.76592	0.959905
								64	0.964094	0.302856	0.358669	0.211055					73.9	0.000310857			61	0.0889486	71.2	0.340129	75	0.290721	0.21342	0.0651204
								64.4	0.954	0.617311	0.661744	0.559575					74.2	0.00106825			61.4	0.149736	71.6	0.46501	75.4	0.27787	0.865992	0.21512
								64.8	0.789109	0.849127	0.641436	0.907005					74.6	0.000198112			61.7	0.170454	72	0.463957	75.8	0.228497	0.467088	0.424154
								65.2	0.780406	0.130282	0.223865	0.301633					75	0.000235486			62.1	0.00602838	72.3	0.386727	76.1	0.768774	0.138571	0.39666
								65.5	0.949157	0.267921	0.501408	0.4029					75.4	8.67134e-05			62.5	0.0325041	72.7	0.260189	76.5	0.431886	0.726401	0.348941
								65.9	0.363685	0.324815	0.97795	0.0499913					75.8	0.000897462			62.9	0.225245	73.1	0.108451	76.9	0.887394	0.724459	0.821104
								66.3	0.29262	0.464432	0.756041	0.251875					76.1	0.000227828			63.3	0.126124	73.5	0.179241	77.3	0.964321	0.94958	0.981304
								66.7	0.484949	0.528077	0.934119	0.403743					76.5	0.000120373			63.6	0.0732901	73.9	0.292355	77.7	0.934042	0.882271	0.960574
								67	0.430037	0.489046	0.946415	0.655737					76.9	5.50164e-06			64	0.299695	74.2	0.720494	78	0.658756	0.174588	0.338299
								67.4	0.687209	0.851214	0.947486	0.518565					77.3	1.45263e-06			64.4	0.0727163	74.6	0.422141	78.4	0.628339	0.0745379	0.154537
								67.8	0.71418	0.960877	0.796781	0.140925					77.7	1.8875e-06			64.8	0.0759627	75	0.172458	78.8	0.188094	0.00941881	0.00536202
								68.2	0.909924	0.947037	0.877839	0.252828					78	7.09836e-05			65.2	0.123229	75.4	0.166249	79.2	0.71822
								68.6	0.563809	0.392143	0.690903	0.145831					78.4	2.12838e-05			65.5	0.530992	75.8	0.153941	79.5	0.926005
								68.9	0.811869	0.162359	0.288456	0.0935815					78.8	0.000159964			65.9	0.148464	76.1	0.198959	79.9	0.769072
								69.3	0.681541	0.207146	0.469931	0.338027					79.2	0.00025738			66.3	0.146484	76.5	0.133134	80.3	0.998175
								69.7	0.363771	0.0330333	0.355716	0.360491					79.5	0.00145359			66.7	0.725851	76.9	0.425573	80.7	0.988276
								70.1	0.413451	0.0502437	0.43599	0.167585					79.9	0.00210197			67	0.865636	77.3	0.233564	81.1	0.732045
								70.5	0.652685	0.357898	0.708651	0.5836					80.3	0.00057845			67.4	0.42075	77.7	0.289348	81.4	0.539925
								70.8	0.549526	0.503413	0.912544	0.098172					80.7	0.000474469			67.8	0.243328	78	0.134301	81.8	0.882931
								71.2	0.656466	0.313882	0.712719	0.211799					81.1	6.01077e-05			68.2	0.472055	78.4	0.24528	82.2	0.822965
								71.6	0.771646	0.199805	0.388896	0.0573873					81.4	2.01304e-05			68.6	0.340359	78.8	0.409134	82.6	0.0848511
								72	0.497689	0.959062	0.537949	0.752391					81.8	5.97437e-05			68.9	0.17718	79.2	0.229453	83	0.0948626
								72.3	0.983916	0.728039	0.767788	0.473747					82.2	0.000171271			69.3	0.263946	79.5	0.247828	83.3	0.0910882
								72.7	0.401985	0.541136	0.771153	0.621688					82.6	0.00016205			69.7	0.12979	79.9	0.51914	83.7	0.231017
								73.1	0.821567	0.955358	0.802437	0.138884					83	0.000230579			70.1	0.286089	80.3	0.688353	84.1	0.429317
								73.5	0.932232	0.607622	0.721542	0.202943					83.3	0.0001942			70.5	0.159614	80.7	0.352921	84.5	0.781498
								73.9	0.773243	0.778209	0.997579	0.556583					83.7	0.00124145			70.8	0.0526312	81.1	0.329063	84.8	0.950571
								74.2	0.991716	0.929084	0.940792	0.100377					84.1	0.00104896			71.2	0.0598337	81.4	0.492373	85.2	0.879467
								74.6	0.440335	0.918867	0.579902	0.0294611					84.5	0.000896485			71.6	0.0219491	81.8	0.33212	85.6	0.573475
								75	0.971645	0.710165	0.710304	0.269182					84.8	0.00254157			72	0.1781	82.2	0.32528	86	0.916395
								75.4	0.92936	0.464955	0.503284	0.50394					85.2	0.00294652			72.3	0.0931904	82.6	0.41883	86.4	0.169407
								75.8	0.904974	0.272963	0.362846	0.281623					85.6	0.00118767			72.7	0.0785319	83	0.267231	86.7	0.748034
								76.1	0.783519	0.369269	0.562239	0.280244					86	0.00150616			73.1	0.0192901	83.3	0.594804	87.1	0.688107
								76.5	0.456454	0.169167	0.640182	0.189012					86.4	0.00124804			73.5	0.0445922	83.7	0.55896	87.5	0.0893138
								76.9	0.803053	0.345754	0.605526	0.270912					86.7	0.000637476			73.9	0.120643	84.1	0.156271
								77.3	0.893109	0.291278	0.457135	0.336078					87.1	0.00026492			74.2	0.0405372	84.5	0.427877
								77.7	0.556313	0.469039	0.909603	0.603357					87.5	5.96711e-05			74.6	0.168842	84.8	0.209624
								78	0.562709	0.363393	0.762058	0.482888					87.9	0.000144425			75	0.263141	85.2	0.102914
								78.4	0.451507	0.672634	0.737249	0.75318					88.3	0.000278172			75.4	0.12828	85.6	0.40716
								78.8	0.170113	0.640779	0.137729	0.272302					88.6	0.0013535			75.8	0.133449	86	0.374034
								79.2	0.121968			0.10572					89	0.00344551			76.1	0.128519	86.4	0.464805
								79.5	0.210271			0.149702					89.4	0.0083467			76.5	0.140049	86.7	0.426645
								79.9	0.174765			0.310934					89.8	0.0119187			76.9	0.176682	87.1	0.375195
								80.3	0.020286			0.208459									77.3	0.154385	87.5	0.139985
								80.7	0.100616			0.823209									77.7	0.176098	87.9	0.195913
								81.1	0.293502			0.630941									78	0.25218	88.3	0.219336
								81.4	0.193937			0.500618									78.4	0.545332	88.6	0.409361
								81.8	0.135182			0.44507											89	0.296408
								82.2	0.105107			0.273727											89.4	0.0329346
								82.6				0.81353											89.8	0.144252
								83				0.0951913											90.2	0.228607
								83.3				0.9937											90.5	0.145902
								83.7				0.529812											90.9	0.210383
								84.1				0.986147											91.3	0.542841
								84.5				0.977132											91.7	0.529542
								84.8				0.323422											92	0.612784
								85.2				0.691451											92.4	0.307251
								85.6				0.947483											92.8	0.257921
								86				0.772424											93.2	0.179882
								86.4				0.804892											93.6	0.545076
								86.7				0.870335
								87.1				0.102113
								87.5				0.124153
								87.9				0.874486
								88.3				0.19136
								88.6				0.940144
								89				0.0607234
								89.4				0.498589
								89.8				0.151353
								90.2				0.73692
								90.5				0.886349
								90.9				0.890738
								91.3				0.987586
								91.7				0.427778
								92				0.339119
								92.4				0.071883
								92.8				0.45746
								93.2				0.20393
								93.6				0.262515
								93.9				0.849072
								94.3				0.355916
								94.7				0.00852771
								95.1				0.290608
								95.5				0.222649
								95.8				0.560122
								96.2				0.869079
								96.6				0.494153
								97				0.391102
								97.3				0.446842
								97.7				0.170348
								98.1				0.452213
								98.5				0.523765
								98.9				0.739626
								99.2				0.758606
[truncated: 7 more columns]

## Sheet: 2E
	Ventral											Dorsal											ttest	p<0.05?
x0	8	1	9	7	6	3	2	4	average	std	count	8	1	9	7	6	3	2	4	average	std	count
-116.7														1.10187			1.33933	1.43278	1.19379	1.26695	0.147583	4
-116.3												1.67024		1.10034			1.563	1.21984	0.697432	1.25017	0.388334	5
-115.9												1.58751		1.01302			1.40521	1.18307	0.789351	1.19563	0.314666	5
-115.5												1.33167		1.03447			1.58292	1.21524	0.960936	1.22505	0.247796	5
-115.2												1.20759		1.10801			1.52624	1.22444	1.08502	1.23026	0.176202	5
-114.8												1.29797		0.983913			1.42206	1.44657	0.959404	1.22198	0.235515	5
-114.4												1.6013		0.928763	0.642281		1.38376	1.5967	1.02068	1.19558	0.392133	6
-114												1.46802		0.82612	0.613176		1.59824	1.9123	1.19839	1.26937	0.488481	6
-113.6												1.40214		0.706628	0.579471		1.24588	1.77595	1.17235	1.14707	0.444322	6
-113.3												1.4144		0.862889	0.645345		1.63194	1.61509	1.06358	1.20554	0.410988	6
-112.9												1.31482		0.927231	0.691304		1.24741	1.57526	1.18307	1.15652	0.309311	6
-112.5												1.11107		0.939485	0.819993		1.32401	1.30256	1.16009	1.10954	0.199284	6
-112.1												0.924167		1.08962	1.09881		1.79893	1.2229	1.44657	1.2635	0.314435	6
-111.7												1.04519		0.98085	1.49713		1.87246	1.16928	1.37916	1.32401	0.332641	6
-111.4												1.15397		1.16009	1.60436		1.99655	1.27805	1.18613	1.39653	0.339488	6
-111												1.51092		1.06817	1.42053		1.54768	1.5676	1.26274	1.39627	0.195699	6
-110.6												1.76982		1.08196	1.10341		1.76676	1.52317	1.14171	1.3978	0.329317	6
-110.2												1.73612		0.977786	1.10341		1.58904	1.34393	1.05439	1.30078	0.309343	6
-109.8												1.27652		0.829184	1.0023		1.58904	1.30103	1.01762	1.16928	0.272621	6
-109.5												1.31482		0.630026	1.20759		1.51092	1.23669	1.25354	1.19226	0.296187	6
-109.1												1.51245		0.824588	1.14937		1.52317	1.14171	1.21678	1.22801	0.262501	6
-108.7	0.342013		0.122942			0.421678		0.52432	0.352738	0.170406	4	1.83723		0.95634	1.07736		2.01341	1.23516	1.21065	1.38836	0.43141	6	0.0011435	p<0.05
-108.3	0.322099		0.0800454			0.562621		0.46151	0.356569	0.209064	4	1.61969		0.993104	1.14937		2.03332	1.2995	1.10954	1.36742	0.391366	6	0.000792893	p<0.05
-108	0.25163		0.118346			0.535043		0.319035	0.306014	0.173974	4	1.48028		0.90119	0.648413		1.93068	1.59058	0.852166	1.23388	0.504506	6	0.0048946	p<0.05
-107.6	0.366527		0.204138			0.515129		0.372654	0.364612	0.127116	4	1.45117		0.964	0.591726		1.93068	1.83876	0.795479	1.26197	0.560585	6	0.00997961	p<0.05
-107.2	0.240902		0.190347			0.702032		0.410955	0.386059	0.230819	4	1.41593		0.95634	0.812334		1.76982	2.02413	0.740328	1.28648	0.534152	6	0.00770754	p<0.05
-106.8	0.253162		0.13826			0.42321		0.456915	0.317887	0.149306	4	1.45883		0.864421	0.758715		1.69169	2.05017	0.790883	1.26912	0.543617	6	0.00648099	p<0.05
-106.4	0.288394		0.207202			0.590194		0.345082	0.357718	0.16499	4	1.26886		0.862889	0.813866		1.85101	1.92608	1.06971	1.29874	0.485177	6	0.00375693	p<0.05
-106.1	0.335886		0.199543			0.430869		0.499811	0.366527	0.130035	4	1.05286		0.706628	0.754119		1.7928	1.51398	1.11873	1.15652	0.426411	6	0.00483174	p<0.05
-105.7	0.417082		0.0448135			0.649945	0.643813	0.498279	0.450787	0.247552	5	1.00843		0.680582	0.666795	1.80352	1.58139	1.30256	1.06817	1.15878	0.431373	7	0.00514403	p<0.05
-105.3	0.449256		0.109155	0.0494089		0.682113	0.668327	0.495211	0.408912	0.272069	6	1.03447		0.925699	0.608581	1.75143	1.53543	1.2949	1.4573	1.22969	0.3954	7	0.00115057	p<0.05
-104.9	0.498279		0.0999642	0.0356175		0.50747	0.649945	0.562621	0.392316	0.257903	6	1.15397		1.01915	0.669859	2.00574	2.34431	1.56607	1.56913	1.47546	0.579318	7	0.00179693	p<0.05
-104.5	0.40636		0.122942	0.0126401		0.387973	0.596321	0.48602	0.335376	0.222656	6	1.06817		1.05592	0.585598	1.8985	2.30754	1.67331	1.491	1.44001	0.582475	7	0.00170296	p<0.05
-104.2	0.29759	0.669859	0.214861	0.0172356		0.482956	0.574876	0.409423	0.380971	0.223276	7	1.14783		1.25354	0.859825	1.77288	2.36576	1.74531	1.44963	1.51354	0.496658	7	0.000496836	p<0.05
-103.8	0.282267	0.703564	0.294526	0.0540044		0.469169	0.646876	0.384909	0.405045	0.224585	7	1.12639		1.09728	1.00996	1.91383	2.41018	1.77595	1.38223	1.53083	0.52041	7	0.000721406	p<0.05
-103.4	0.351209	0.594789	0.147456	0.0463453		0.40636	0.656072	0.368059	0.367184	0.219191	7	1.03447		0.973191	1.10647	1.6396	2.46994	1.82344	1.29797	1.47787	0.540274	7	0.00103126	p<0.05
-103	0.427805	0.691304	0.152051	-0.125239		0.59939	0.475297	0.3604	0.368715	0.277828	7	1.01302		1.07277	1.13558	1.48181	2.59709	1.70088	1.37916	1.4829	0.549138	7	0.00102438	p<0.05
-102.7	0.492147	0.74186	0.33129	-0.039447		0.515129	0.455383	0.421678	0.416863	0.237345	7	0.884335		1.06817	1.28112	1.42512	2.04251	1.75603	1.34086	1.39974	0.394516	7	0.000226139	p<0.05
-102.3	0.458447	0.571812	0.190347	-0.0624295		0.559557	0.52432	0.48602	0.389725	0.237454	7	1.05898		1.09115	1.08196	1.34086	2.21103	1.79893	1.36997	1.42184	0.434126	7	0.000331026	p<0.05
-101.9	0.466106	0.504407	0.0923051	0.0126401		0.596321	0.614708	0.48602	0.396072	0.242187	7	1.40061		1.07736	1.08656	1.24435	2.09153	1.47874	1.56147	1.42009	0.349818	7	6.08045e-05	p<0.05
-101.5	0.397169	0.754119	0.0478771	-0.0455743		0.656072	0.657604	0.48602	0.421898	0.311959	7	1.36538		1.35619	1.36385	1.14783	2.30601	1.25814	1.47415	1.46736	0.383563	7	0.00013617	p<0.05
-101.1	0.456915	0.708159	0.198011	0.0126401		0.429337	0.74186	0.50747	0.436342	0.261114	7	1.48181		1.09728	1.17388	1.23209	2.21716	1.35465	1.35465	1.41593	0.375886	7	0.000162189	p<0.05
-100.8	0.315972	0.729605	0.277671	-0.0578289		0.389504	0.682113	0.456915	0.399136	0.265582	7	1.36691		1.28571	1.01915	1.36538	2.30141	1.47874	1.39601	1.45905	0.398907	7	0.000135797	p<0.05
-100.4	0.299122	0.603985	0.296058	0.10456		0.415551	0.659136	0.516661	0.413582	0.195613	7	1.45117		1.10187	0.884335	1.46649	2.03332	1.80199	1.27652	1.43081	0.39436	7	0.000194837	p<0.05
-100	0.254694	0.705096	0.227116	0.193416		0.562621	0.561089	0.426273	0.418615	0.198923	7	1.44504		1.23516	0.911912	1.72846	2.27384	1.87859	1.26733	1.53433	0.45812	7	0.0003274	p<0.05
-99.6	0.187283	0.760247	0.188815	0.0585999		0.556494	0.567216	0.386441	0.386442	0.254142	7	1.40061		1.36385	0.947144	1.88012	1.73152	1.74684	1.50632	1.51091	0.314191	7	1.11124e-05	p<0.05
-99.2	0.254694	0.709691	0.132133	0.122942		0.581003	0.498279	0.407891	0.386662	0.226117	7	1.35312	2.00881	1.37763	0.869016	1.87399	1.75756	1.53389	1.51551	1.53619	0.356709	8	6.93532e-06	p<0.05
-98.9	0.136728	0.654541	0.155115	0.0938369	0.23937	0.544234	0.533511	0.450788	0.351015	0.218966	8	1.14783	1.90004	1.46496	1.22137	1.61509	1.70701	1.4527	1.4481	1.49464	0.246028	8	1.31247e-07	p<0.05
-98.5	0.135196	0.755651	0.217925	0.0494089	0.29759	0.447724	0.614708	0.533511	0.381464	0.246871	8	1.0789	2.03792	1.27959	1.40827	1.72999	1.6779	1.1846	1.11107	1.43853	0.344079	8	9.71283e-06	p<0.05
-98.1	0.171965	0.625431	0.302185	-0.0578289	0.234775	0.447724	0.747987	0.438528	0.363846	0.257375	8	1.20298	2.0563	1.06664	1.00996	1.72233	1.31789	1.09115	0.98085	1.30601	0.386161	8	8.71486e-05	p<0.05
-97.7	0.112219	0.516661	0.23937	0.0248947	0.309845	0.498279	0.630026	0.44006	0.346419	0.211211	8	1.35159	1.65032	1.1846	1.02068	1.52317	1.70701	1.06971	1.06971	1.3221	0.276288	8	2.32705e-06	p<0.05
-97.3	0.101496	0.605517	0.228648	0.164306	0.317504	0.531979	0.571812	0.510534	0.378974	0.199528	8	1.39908	1.29337	1.30256	1.16316	1.3041	1.65952	1.36538	1.03447	1.3152	0.181579	8	1.26986e-07	p<0.05
-97	0.208734	0.562621	0.300654	0.211798	0.3604	0.596321	0.630026	0.516661	0.423402	0.17344	8	1.57219	1.47874	1.44657	1.24129	1.24894	1.70854	1.57219	1.08656	1.41938	0.20912	8	8.13986e-08	p<0.05
-96.6	0.286862	0.610113	0.286862	0.162774	0.340481	0.731137	0.7005	0.466106	0.448104	0.212259	8	1.26274	1.66105	1.2275	1.20145	1.4573	1.35005	1.45883	1.21371	1.35408	0.161793	8	2.73336e-07	p<0.05
-96.2	0.334354	0.603985	0.289926	0.308313	0.430869	0.600922	0.703564	0.519725	0.473957	0.156064	8	1.42512	1.68403	1.37151	0.931826	1.53543	1.43125	1.48181	1.04826	1.36365	0.250846	8	2.32774e-06	p<0.05
-95.8	0.294526	0.849098	0.357336	0.473765	0.417082	0.513597	0.594789	0.438528	0.49234	0.170915	8	1.71927	1.67484	1.34086	1.27193	1.77595	1.34852	1.51551	0.772501	1.42742	0.325672	8	2.18371e-05	p<0.05
-95.5	0.317504	0.639217	0.444655	0.332822	0.412487	0.577939	0.646876	0.591726	0.495403	0.134827	8	1.48947	1.59824	1.36538	1.19073	1.946	1.45423	1.60896	0.718882	1.42149	0.358018	8	7.71977e-05	p<0.05
-95.1	0.231711	0.484488	0.329758	0.110687	0.418614	0.775565	0.747987	0.573344	0.459019	0.235665	8	1.52624	1.85867	1.32401	0.928763	2.15588	1.36231	1.81118	0.786288	1.46917	0.468182	8	0.000249965	p<0.05
-94.7	0.351209	0.602453	0.144392	0.0984324	0.504407	0.548835	0.751056	0.594789	0.449447	0.231246	8	1.57066	1.64573	1.32555	0.735732	1.91076	1.5293	1.82191	0.999232	1.44236	0.40323	8	7.92993e-05	p<0.05
-94.3	0.55343	0.561089	0.12141	0.156647	0.548835	0.565685	0.628494	0.400232	0.441978	0.19786	8	1.42819	1.47568	1.18613	0.764842	1.60283	1.67484	1.66411	0.93489	1.34144	0.344552	8	4.72747e-05	p<0.05
-93.9	0.436996	0.672922	0.0693227	0.211798	0.265417	0.630026	0.642281	0.380314	0.413635	0.223367	8	1.24588	1.58904	1.0023	1.04519	1.58904	1.69169	1.56147	0.882803	1.32593	0.319383	8	1.99565e-05	p<0.05
-93.6	0.441592	0.663732	0.0677908	0.124473	0.282267	0.40636	0.804675	0.343545	0.391804	0.250107	8	1.28112	1.40674	1.23209	1.04979	1.62735	1.93221	1.47108	0.911912	1.36404	0.323571	8	1.3301e-05	p<0.05
-93.2	0.37725	0.703564	0.263885	0.12141	0.286862	0.6622	0.836843	0.381845	0.454232	0.25014	8	1.12332	1.37457	1.41287	1.14477	1.62735	1.96285	1.47108	1.08043	1.39966	0.29717	8	8.74529e-06	p<0.05
-92.8	0.305249	0.528916	0.415551	0.13826	0.303717	0.795479	0.718882	0.499811	0.463233	0.220286	8	1.12792	1.35619	1.34852	1.27959	1.43738	1.98889	1.68403	1.18613	1.42608	0.283412	8	3.62909e-06	p<0.05
-92.4	0.372654	0.607049	0.349677	0.155115	0.380314	0.472233	0.682113	0.371123	0.423785	0.163716	8	1.59211	1.5967	1.78208	1.73765	1.40214	1.96591	1.8265	1.08349	1.62332	0.277474	8	3.35512e-07	p<0.05
-92	0.213329	0.590194	0.329758	0.274607	0.42321	0.453851	0.804675	0.345082	0.429338	0.190865	8	1.58139	1.74684	2.23095	1.71927	1.44504	1.49866	1.77748	1.08043	1.635	0.329536	8	1.90621e-06	p<0.05
-91.7	0.211798	0.463042	0.292989	0.162774	0.348145	0.818461	0.830716	0.432401	0.445041	0.255023	8	2.00115	1.96745	2.40559	1.54002	1.65185	1.65339	1.5293	0.760247	1.68862	0.4783	8	5.15186e-05	p<0.05
-91.3	0.277671	0.640749	0.202607	0.227116	0.456915	0.533511	0.849098	0.619304	0.475871	0.22884	8	1.97817	1.85101	1.88931	1.58904	1.79739	1.80965	1.43125	0.734201	1.635	0.40374	8	2.01124e-05	p<0.05
-90.9	0.243971	0.668327	0.199543	0.326695	0.539639	0.527384	0.812334	0.640749	0.49483	0.218326	8	1.58598	1.57066	1.5676	1.4864	1.65032	1.84029	1.491	0.982381	1.52183	0.244871	8	4.55495e-07	p<0.05
-90.5	0.302185	0.708159	0.168901	0.265417	0.430869	0.740328	0.702032	0.539639	0.482191	0.223448	8	1.52317	1.48487	1.63654	1.75143	1.7208	1.80812	1.39755	1.02528	1.54347	0.252715	8	4.35729e-07	p<0.05
-90.2	0.198011	0.82612	0.15971	0.230179	0.472233	0.916508	0.709691	0.509002	0.502682	0.29384	8	1.2949	1.73918	1.37457	2.09153	1.68403	1.95825	1.29797	1.12179	1.57028	0.349105	8	1.33329e-05	p<0.05
-89.8	0.237839	0.610113	0.133664	0.311376	0.515129	0.691304	0.810802	0.472233	0.472808	0.23266	8	1.10494	1.57219	1.35005	1.46189	1.59517	1.491	1.30256	1.07277	1.36882	0.199358	8	1.08945e-06	p<0.05
-89.4	0.254694	0.574876	0.0570681	0.243971	0.466106	0.556494	0.830716	0.46151	0.430679	0.240319	8	1.15856	1.53543	1.14937	1.16622	1.71314	1.47262	1.31023	1.00076	1.31329	0.240455	8	3.65767e-06	p<0.05
-89	0.259289	0.55343	0.116814	0.426273	0.509002	0.476829	0.827652	0.637685	0.475872	0.218873	8	1.08809	1.63347	1.16469	1.0023	1.45576	1.78361	1.48334	1.20298	1.35178	0.278454	8	8.45792e-06	p<0.05
-88.6	0.326695	0.603985	0.25163	0.228648	0.435464	0.47836	0.922635	0.490615	0.467254	0.223904	8	1.05898	1.49253	1.0314	0.973191	1.22137	1.61969	1.54768	1.25967	1.27556	0.250908	8	9.20963e-06	p<0.05
-88.3	0.354272	0.721946	0.225584	0.113751	0.280735	0.484488	0.930294	0.473765	0.448104	0.269286	8	1.04519	1.76523	0.988509	0.982381	1.14937	1.73765	1.38836	1.25201	1.28859	0.316806	8	5.87408e-05	p<0.05
-87.9	0.335886	0.818461	0.210266	0.182688	0.211798	0.692836	1.01609	0.456915	0.490617	0.316392	8	1.15856	1.62275	0.974722	1.12486	1.12026	1.81272	1.27652	1.06051	1.26886	0.294227	8	0.000165953	p<0.05
-87.5	0.202607	0.671391	0.15052	0.208734	0.296058	0.665263	1.12332	0.449256	0.470894	0.333386	8	1.17694	1.81731	1.1509	1.45883	1.18613	1.62122	1.14937	0.951745	1.31406	0.290013	8	0.000100529	p<0.05
-87.1	0.193416	0.674454	0.136728	0.228648	0.395637	0.705096	0.994636	0.44006	0.471084	0.2987	8	1.17235	2.16047	1.47415	2.12524	1.37457	1.55381	1.10954	0.858294	1.47855	0.465122	8	0.000243225	p<0.05
-86.7	0.47836	0.738796	0.188815	0.148988	0.345082	0.665263	0.907317	0.421678	0.486787	0.267126	8	1.30716	1.97511	1.15703	2.3244	1.39908	1.42206	1.1126	0.98085	1.45979	0.460293	8	0.00028769	p<0.05
-86.4	0.645345	0.528916	0.15052	0.07545	0.496747	0.536575	0.755651	0.421678	0.45136	0.232457	8	1.37457	1.42819	1.00076	2.13903	1.58139	2.04557	1.17388	1.03447	1.47223	0.43089	8	0.000113215	p<0.05
-86	0.3987	0.473765	0.179624	0.103028	0.525852	0.568748	0.714287	0.414019	0.422253	0.200545	8	1.16316	1.53236	0.916508	1.50632	1.563	2.30754	1.31942	0.823056	1.39142	0.464089	8	0.000345748	p<0.05
-85.6	0.401764	0.607049	0.18422	0.0616635	0.429337	0.72501	0.614708	0.427805	0.431445	0.223402	8	0.933358	1.51551	0.786288	1.23975	1.50172	2.00727	1.29644	0.881271	1.2702	0.406654	8	0.000349713	p<0.05
-85.2	0.430869	0.593257	0.213329	0.0984324	0.361932	0.535043	0.786288	0.531979	0.443891	0.218763	8	0.965531	1.66718	0.723478	1.25814	1.43585	1.82038	1.18154	1.09881	1.26886	0.361903	8	0.00015383	p<0.05
-84.8	0.430869	0.449256	0.26848	0.021831	0.3941	0.579471	0.793947	0.528916	0.433359	0.226414	8	0.899653	1.71161	0.927231	1.19073	1.33933	1.86327	1.02221	1.1509	1.26312	0.356156	8	0.00012888	p<0.05
-84.5	0.574876	0.44006	0.25163	0.0356175	0.449256	0.660668	0.784756	0.515129	0.463999	0.234787	8	0.778629	2.05017	0.839907	1.01915	1.48947	1.76982	1.17694	1.21371	1.29222	0.447833	8	0.000803735	p<0.05
-84.1	0.562621	0.548835	0.265417	0.262353	0.476829	1.00843	0.781692	0.692836	0.574876	0.253132	8	0.832247	1.97511	1.05286	0.879739	1.47262	1.87553	1.2658	0.9977	1.29395	0.441677	8	0.00204827	p<0.05
-83.7	0.417082	0.651477	0.273076	0.101496	0.414019	0.792415	0.683645	0.651477	0.498086	0.235936	8	0.970127	1.66411	1.31023	1.00076	1.43738	2.45461	1.37151	1.20452	1.42666	0.473428	8	0.000521554	p<0.05
-83.3	0.417082	0.593257	0.309845	0.0815773	0.40636	1.07583	0.559557	0.656072	0.512448	0.29126	8	0.928763	1.54768	1.3087	1.6442	1.4527	2.41172	1.55534	1.19992	1.50613	0.432971	8	0.000152083	p<0.05
-83	0.257757	0.651477	0.254694	0.00191731	0.357336	1.10341	0.573344	0.656072	0.482001	0.338377	8	1.06358	1.89391	1.2995	1.65492	1.38989	2.52815	1.74377	1.27805	1.60647	0.462453	8	9.85544e-05	p<0.05
-82.6	0.291458	0.567216	0.25163	0.136728	0.328226	1.0743	0.562621	0.649945	0.482766	0.298812	8	1.10034	2.08388	1.23516	1.84029	1.21218	2.34891	1.82191	1.17541	1.60226	0.480384	8	0.000127719	p<0.05
-82.2	0.395637	0.769438	0.228648	0.213329	0.29759	1.11567	0.456915	0.528916	0.500767	0.307525	8	1.05592	1.946	1.29644	2.29529	1.3761	1.72999	2.01953	1.03294	1.59402	0.471415	8	0.000135813	p<0.05
-81.8	0.417082	0.657604	0.199543	0.250098	0.188815	1.02987	0.550366	0.472233	0.470702	0.282459	8	1.28571	1.55687	1.59517	1.68862	1.41593	2.20796	2.22022	1.02375	1.62428	0.418166	8	2.76175e-05	p<0.05
-81.4	0.380314	0.509002	0.15052	0.12141	0.294526	1.19073	0.660668	0.561089	0.483532	0.343631	8	1.37151	1.67024	1.82344	1.62122	1.27652	2.27997	2.17733	1.0743	1.66182	0.423187	8	3.20736e-05	p<0.05
-81.1	0.397169	0.643813	0.198011	0.296058	0.407891	1.09881	0.723478	0.498279	0.532939	0.285949	8	1.37304	1.39448	1.59824	1.42359	1.16163	2.04557	1.82957	1.01609	1.48028	0.336911	8	3.26457e-05	p<0.05
-80.7	0.338949	0.689773	0.23937	0.372654	0.436996	1.16928	0.671391	0.456915	0.546917	0.295593	8	1.10647	1.30563	1.49559	1.19686	1.20298	1.75297	1.47108	1.15856	1.33627	0.220298	8	4.13565e-05	p<0.05
-80.3	0.470701	0.654541	0.234775	0.129069	0.410955	1.11107	0.613176	0.571812	0.524512	0.299325	8	1.17848	1.36691	1.29184	1.30256	1.11107	1.64726	1.44657	1.21218	1.31961	0.169757	8	4.07579e-05	p<0.05
-79.9	0.44006	0.577939	0.306781	0.0693227	0.410955	1.19686	0.631558	0.634622	0.533512	0.327865	8	1.36385	1.57832	1.31176	1.4527	1.27499	1.48793	1.73152	1.10954	1.41383	0.192641	8	3.62238e-05	p<0.05
-79.5	0.380314	0.671391	0.233243	0.0938369	0.395637	1.08502	0.76331	0.577939	0.525087	0.316982	8	1.31942	1.491	0.988509	1.29184	1.27346	1.47108	1.3761	1.0023	1.27671	0.190489	8	0.000109327	p<0.05
-79.2	0.248566	0.962468	0.187283	0.109155	0.366527	0.737264	0.764842	0.55343	0.491192	0.31033	8	1.34086	1.80199	0.950208	1.35312	1.11873	1.95059	1.02375	1.08809	1.32842	0.368342	8	0.000246635	p<0.05
-78.8	0.22252	0.784756	0.170433	0.15971	0.395637	0.769438	0.87208	0.484488	0.482383	0.293302	8	1.43585	1.64879	1.09421	1.62275	1.06817	1.7499	0.933358	1.44657	1.37495	0.305602	8	3.51089e-05	p<0.05
-78.4	0.273076	0.783224	0.220989	0.141324	0.484488	0.911912	1.0314	0.622367	0.558598	0.333384	8	1.34699	1.66258	1.24129	1.50325	1.27499	1.67943	1.04519	1.82803	1.44772	0.26517	8	4.70519e-05	p<0.05
-78	0.230179	0.723478	0.228648	0.0356175	0.397169	0.93489	1.03447	0.611644	0.524512	0.359572	8	1.20298	1.49713	1.47721	1.47108	1.38376	1.79433	1.17541	1.3087	1.41383	0.19722	8	7.7881e-05	p<0.05
-77.7	0.139792	0.740328	0.106092	0.0647272	0.432401	0.841438	0.921103	0.547303	0.474148	0.343824	8	1.05439	1.61815	1.31023	1.29337	1.30103	1.87859	1.46496	1.17388	1.38683	0.261663	8	4.52865e-05	p<0.05
-77.3	0.161242	0.675986	0.132133	0.112219	0.447724	0.947144	0.928763	0.484488	0.486212	0.341563	8	1.05132	1.77442	1.24588	1.40214	1.17541	1.84795	1.5967	1.11873	1.40157	0.305756	8	6.2978e-05	p<0.05
-76.9	0.254694	0.698969	0.158179	0.289926	0.383377	0.937953	0.84297	0.608581	0.521831	0.290749	8	1.13558	1.88931	1.18613	1.17235	1.09728	2.15741	1.5967	1.12332	1.41976	0.411328	8	0.000248389	p<0.05
-76.5	0.345082	0.668327	0.288394	0.363463	0.346613	1.15243	0.970127	0.648413	0.597856	0.323239	8	0.98085	1.79586	1.12026	1.1172	1.06205	2.25852	1.54615	1.02834	1.36365	0.46149	8	0.00216176	p<0.05
-76.1	0.372654	0.867484	0.213329	0.489083	0.342013	1.11413	1.06205	0.579471	0.630027	0.342811	8	0.88893	1.4144	1.0789	0.973191	1.22137	1.92761	1.62888	1.07736	1.27633	0.356788	8	0.00240907	p<0.05
-75.8	0.409423	0.74186	0.245503	0.556494	0.387973	1.02528	1.05898	0.472233	0.612218	0.301334	8	0.974722	1.52164	1.12332	1.31482	1.4144	2.22175	1.65032	1.48487	1.46323	0.376607	8	0.000227796	p<0.05
-75.4	0.386441	0.675986	0.274607	0.354272	0.363463	0.973191	1.01609	0.602453	0.580813	0.288606	8	1.17694	1.56454	1.15397	1.23056	1.29644	2.28303	1.71773	1.32248	1.46821	0.382899	8	0.000160561	p<0.05
-75	0.374186	0.659136	0.248566	0.274607	0.357336	1.12026	0.827652	0.781692	0.58043	0.315143	8	1.34086	1.60743	1.44351	1.2658	1.38223	1.95365	1.62735	1.13405	1.46936	0.255568	8	2.8031e-05	p<0.05
-74.6	0.510534	0.61624	0.368059	0.176561	0.395637	1.05132	0.755651	0.781692	0.581961	0.27812	8	1.40521	1.64573	1.50478	1.44963	1.46955	1.84642	1.67943	1.06971	1.50881	0.230044	8	5.05068e-06	p<0.05
-74.2	0.512066	0.602453	0.319035	0.15971	0.414019	0.88893	0.668327	0.715819	0.535045	0.23389	8	1.3807	1.77442	1.35005	1.69016	1.5247	2.14822	1.77135	1.08502	1.59058	0.327148	8	5.8292e-06	p<0.05
-73.9	0.473765	0.625431	0.265417	0.106092	0.469169	0.933358	0.651477	0.708159	0.529108	0.260456	8	1.21371	1.60436	1.25508	1.79127	1.80046	2.38874	1.6825	1.31942	1.63194	0.386274	8	1.9747e-05	p<0.05
-73.5	0.452319	0.568748	0.291458	0.106092	0.487551	0.98085	0.715819	0.611644	0.52681	0.264661	8	1.17388	1.76523	1.32708	1.44504	1.72692	2.35197	1.38529	1.44044	1.57698	0.369607	8	2.14005e-05	p<0.05
-73.1	0.496747	0.61624	0.332822	0.147456	0.561089	0.839907	0.913444	0.631558	0.567408	0.249834	8	1.27805	1.10187	1.02987	1.38989	1.52317	2.17426	1.18767	1.43891	1.39046	0.358842	8	0.000157861	p<0.05
-72.7	0.340481	0.777097	0.473765	0.144392	0.594789	0.999232	0.937953	0.63309	0.6126	0.291714	8	1.0743	1.08043	0.783224	1.0789	1.16163	2.04251	1.16775	1.26274	1.20643	0.365358	8	0.00315385	p<0.05
-72.3	0.308313	0.6959	0.363463	0.250098	0.375718	0.838375	0.774033	0.78016	0.548258	0.245273	8	1.04979	1.1126	1.01149	1.33167	1.27346	1.84029	1.30103	1.54155	1.30774	0.275798	8	4.69096e-05	p<0.05
-72	0.407891	0.594789	0.31444	0.323631	0.576407	0.914976	0.715819	0.76331	0.576408	0.217208	8	1.50478	1.24588	1.24282	1.6013	1.71467	1.97204	1.45117	1.84335	1.572	0.264227	8	1.26286e-06	p<0.05
-71.6	0.444655	0.688241	0.3987	0.152051	0.387973	0.999232	0.714287	0.709691	0.561854	0.264816	8	1.43125	1.55687	1.34546	1.21678	1.76676	2.06549	1.52777	1.55074	1.55764	0.261798	8	2.61695e-06	p<0.05
-71.2	0.256226	0.653009	0.54117	0.407891	0.607049	0.85523	0.78016	0.59939	0.587516	0.191893	8	1.21831	2.00881	1.65185	1.38223	1.66718	2.11911	1.72846	1.43891	1.65186	0.30656	8	2.87187e-06	p<0.05
-70.8	0.256226	0.861357	0.349677	0.447724	0.564153	0.937953	0.836843	0.668327	0.615282	0.252623	8	1.03753	2.36882	1.35005	1.43738	1.87706	2.19111	1.96898	1.16469	1.67445	0.493363	8	0.000258349	p<0.05
-70.5	0.299122	0.640749	0.40636	0.337417	0.470701	1.38989	0.902722	0.737264	0.648028	0.364751	8	1.08809	1.90157	1.33627	1.60283	2.00574	2.33512	2.2432	1.19992	1.71409	0.477676	8	0.000230791	p<0.05
-70.1	0.361932	0.559557	0.334354	0.236307	0.487551	1.35005	1.0789	0.755651	0.645538	0.391583	8	1.11873	1.94753	1.40981	1.31635	2.25392	2.65224	2.20949	1.16009	1.75852	0.581601	8	0.000701207	p<0.05
-69.7	0.452319	0.821525	0.262353	0.118346	0.475297	1.21218	1.07124	0.689773	0.637879	0.382817	8	1.06051	1.53543	1.44657	1.2612	2.2432	2.59862	1.76216	1.25508	1.64535	0.530943	8	0.000820429	p<0.05
-69.3	0.475297	0.784756	0.326695	0.118346	0.525852	1.27346	0.991572	0.668327	0.645538	0.369715	8	1.13098	1.491	1.45423	1.06971	2.01187	2.15281	1.49866	1.30716	1.51455	0.386776	8	0.000419489	p<0.05
-68.9	0.458447	0.720414	0.288394	0.0938369	0.432401	1.2995	0.824588	0.501343	0.577365	0.370579	8	1.35619	1.15243	1.50632	1.09881	2.1666	1.91076	1.27499	1.09115	1.44466	0.398003	8	0.00049497	p<0.05
-68.6	0.361932	0.973191	0.446192	-0.0118742	0.463042	1.63807	0.781692	0.657604	0.663731	0.49196	8	1.64726	1.24282	1.50325	1.28571	1.87553	1.77595	1.31023	1.0069	1.45595	0.296304	8	0.0022787	p<0.05
-68.2	0.352741	0.80927	0.40636	0.153583	0.519725	1.35312	0.916508	0.778629	0.661242	0.381244	8	1.43891	1.3087	1.47415	1.14783	1.55994	1.45423	1.59364	1.24435	1.40272	0.155436	8	0.000594371	p<0.05
-67.8	0.358868	0.669859	0.407891	0.0846409	0.418614	1.37763	0.858294	0.838375	0.626772	0.400168	8	1.38223	1.57526	1.51245	1.15703	1.52624	1.35619	1.58292	1.36691	1.4324	0.144776	8	0.000495424	p<0.05
-67.4	0.364995	0.672922	0.311376	0.119878	0.343545	1.35159	0.902722	0.928763	0.624473	0.414031	8	1.40674	1.97051	1.53389	1.47262	1.48947	1.48947	1.77748	1.28878	1.55362	0.217389	8	0.000179397	p<0.05
-67	0.495211	0.593257	0.214861	0.22252	0.302185	1.18767	0.852166	0.775565	0.580429	0.343769	8	1.3378	1.69322	1.44504	1.38682	1.42666	1.82803	2.07315	1.33167	1.5653	0.271289	8	2.25547e-05	p<0.05
-66.7	0.645345	0.562621	0.338949	0.292989	0.302185	1.25814	0.859825	0.729605	0.623708	0.331126	8	1.57679	1.94446	1.35159	1.24741	1.4864	1.82803	2.21869	1.1463	1.59996	0.370086	8	7.3459e-05	p<0.05
-66.3	0.57028	0.550366	0.311376	0.271544	0.308313	1.48487	0.850634	0.649945	0.624666	0.400545	8	1.59977	1.71773	1.33627	1.02834	1.67484	1.92302	1.66105	1.28112	1.52777	0.288796	8	0.000191919	p<0.05
-65.9	0.479892	0.567216	0.372654	0.384909	0.358868	1.21831	0.896589	0.712755	0.623899	0.304727	8	1.26427	1.7499	1.12026	0.841438	1.69169	2.0226	1.40981	1.47721	1.44715	0.376465	8	0.000313355	p<0.05
-65.5	0.479892	0.675986	0.409423	0.482956	0.220989	1.26427	0.911912	0.705096	0.643815	0.326911	8	1.27499	1.55687	1.08349	0.939485	1.65798	2.41325	1.53083	1.6825	1.51742	0.452347	8	0.000715114	p<0.05
-65.2	0.430869	0.714287	0.289926	0.397169	0.279203	1.51092	1.02221	0.896589	0.692647	0.432467	8	1.25967	1.35772	1.17541	1.08043	1.81578	2.08694	1.56913	1.45423	1.47491	0.339212	8	0.00138976	p<0.05
-64.8	0.243971	0.628494	0.257757	0.510534	0.309845	1.17388	1.29337	0.786288	0.650518	0.407305	8	1.2658	1.49559	1.23209	0.999232	1.70241	1.97357	1.62428	1.19073	1.43546	0.320809	8	0.000852897	p<0.05
-64.4	0.294526	0.657604	0.329758	0.574876	0.446192	1.04366	1.55074	0.907317	0.725585	0.424764	8	1.11567	1.52624	1.31635	1.27039	1.69016	2.14515	1.81884	1.06051	1.49291	0.374478	8	0.00187754	p<0.05
-64	0.292989	0.637685	0.383377	0.443123	0.433932	0.964	1.79127	0.924167	0.733818	0.493996	8	1.11107	2.02719	1.38836	1.29337	1.72539	2.32899	1.563	0.947144	1.54807	0.464992	8	0.00437843	p<0.05
-63.6	0.395637	0.728073	0.410955	0.418614	0.429337	0.951745	1.57526	0.884335	0.724244	0.411988	8	1.36078	1.70854	1.62122	1.54462	1.46955	1.93068	1.27499	1.1172	1.50345	0.257193	8	0.000719332	p<0.05
-63.3	0.467638	0.698969	0.349677	0.326695	0.47836	0.862889	1.44657	0.735732	0.670816	0.367144	8	1.1509	1.80199	1.70701	1.91689	1.38989	1.9123	1.18613	1.16316	1.52853	0.341696	8	0.00026742	p<0.05
-62.9	0.472233	0.61624	0.357336	0.528916	0.525852	1.12179	1.42512	0.749524	0.724627	0.365909	8	1.42359	1.79127	1.61662	1.59211	1.80658	2.07928	1.13711	1.36538	1.60149	0.295133	8	0.000135617	p<0.05
-62.5	0.308313	0.630026	0.37725	0.247035	0.463042	1.20145	1.25661	0.718882	0.650326	0.390182	8	1.47108	1.87246	1.82803	1.3332	1.84795	1.76216	1.2949	1.48793	1.61222	0.240908	8	7.75308e-05	p<0.05
-62.1	0.320567	0.493679	0.427805	0.265417	0.407891	1.25508	1.22137	0.7005	0.636538	0.393253	8	1.39142	1.75909	1.4144	0.884335	1.58445	1.81731	1.30103	1.61509	1.47089	0.297409	8	0.000352931	p<0.05
-61.7	0.322099	0.806206	0.499811	0.199543	0.374186	1.1846	1.36538	0.648413	0.67503	0.418504	8	1.1172	2.13596	1.13864	1.07736	1.90157	1.86174	1.59364	1.69628	1.5653	0.408041	8	0.000723226	p<0.05
-61.4	0.501343	0.715819	0.450788	0.266948	0.476829	1.16469	1.57526	0.712755	0.733054	0.433029	8	1.41134	1.92915	1.14783	1.12179	2.46074	2.27384	1.78667	1.68096	1.72654	0.49067	8	0.000767522	p<0.05
-61	0.626963	0.798542	0.28533	0.28533	0.466106	0.816929	1.46189	0.732669	0.68422	0.379263	8	1.31329	1.82957	1.44197	1.07736	1.93221	2.0517	2.0563	1.65645	1.66986	0.362486	8	0.000110143	p<0.05
-60.6	0.352741	0.642281	0.387973	0.234775	0.48602	0.82612	1.2229	0.74186	0.611834	0.319017	8	1.2949	1.563	1.34393	1.04826	1.51245	1.8311	2.14822	1.52011	1.53275	0.33727	8	6.49797e-05	p<0.05
-60.2	0.354272	0.862889	0.418614	0.345082	0.683645	0.786288	1.28878	0.711223	0.681349	0.316887	8	1.17541	1.49406	1.35619	1.01609	1.39295	1.70701	2.05477	1.32555	1.44025	0.321647	8	0.000308359	p<0.05
-59.8	0.463042	0.714287	0.361932	0.410955	0.531979	1.04826	1.51551	0.775565	0.727691	0.390666	8	1.23975	1.61662	1.66258	0.856762	1.67484	1.59824	1.64266	1.76063	1.50651	0.304649	8	0.00063368	p<0.05
-59.5	0.602453	0.579471	0.337417	0.429337	0.436996	1.11413	1.35159	0.731137	0.697817	0.357559	8	1.38836	1.84029	1.61203	0.916508	1.63194	1.57679	1.62275	1.67484	1.53294	0.278141	8	0.000158753	p<0.05
-59.1	0.509002	0.735732	0.449256	0.436996	0.55343	1.3378	1.0743	0.766374	0.732861	0.323803	8	1.12639	1.69475	1.52164	0.964	1.38836	1.36385	1.53389	1.79893	1.42397	0.277887	8	0.000452598	p<0.05
-58.7	0.671391	0.576407	0.26848	0.492147	0.44006	1.42666	0.941017	0.680582	0.687092	0.358217	8	0.919572	1.8694	1.38836	1.04979	1.67331	1.2612	1.68403	1.90923	1.46936	0.372135	8	0.000759651	p<0.05
-58.3	0.680582	0.54117	0.178092	0.33129	0.426273	1.17082	0.847566	0.698969	0.609345	0.313178	8	0.982381	1.6105	1.50172	1.12332	1.44963	1.26427	1.96898	2.04557	1.4933	0.377466	8	0.000180272	p<0.05
-58	0.581003	0.734201	0.31444	0.380314	0.400232	1.06817	0.841438	0.747987	0.633474	0.261452	8	1.02681	1.71314	1.69475	1.38223	1.65339	1.53849	2.0563	1.88165	1.61834	0.313785	8	9.83788e-06	p<0.05
-57.6	0.50747	0.674454	0.352741	0.521257	0.384909	1.2995	0.875144	0.545766	0.645155	0.311526	8	1.09115	1.50632	1.60283	1.67484	1.65032	2.1283	2.20184	1.73305	1.69858	0.349921	8	1.88246e-05	p<0.05
-57.2	0.417082	0.823056	0.332822	0.441592	0.446192	1.036	0.968595	0.565685	0.628878	0.273551	8	1.32861	1.62735	1.5293	1.69322	1.52777	2.27844	2.14056	1.64113	1.7208	0.323098	8	4.60284e-06	p<0.05
-56.8	0.361932	0.711223	0.432401	0.320567	0.559557	1.00536	1.02068	0.554962	0.620836	0.271689	8	1.4573	2.08847	1.39142	1.37763	2.06549	1.82038	1.97357	1.42359	1.69973	0.318091	8	4.53528e-06	p<0.05
-56.4	0.424742	0.622367	0.430869	0.421678	0.565685	1.41134	1.25661	0.581003	0.714286	0.392441	8	1.53083	1.70394	1.28112	1.23056	2.04711	2.28916	1.92149	1.3424	1.66833	0.389316	8	0.000242594	p<0.05
-56.1	0.463042	0.605517	0.386441	0.317504	0.547303	1.27193	1.44044	0.630026	0.707775	0.416239	8	1.55687	1.69169	1.32401	1.17082	1.81578	2.81003	1.62581	1.41134	1.67579	0.503086	8	0.000969183	p<0.05
-55.7	0.309845	0.67905	0.381845	0.276139	0.52432	1.5293	1.48028	0.76331	0.74301	0.500026	8	1.55841	1.53543	1.4573	1.49713	1.65185	2.71505	1.50325	1.563	1.68518	0.420128	8	0.00119051	p<0.05
-55.3	0.245503	0.965531	0.320567	0.33129	0.409423	1.67331	1.46343	0.908849	0.789737	0.554303	8	1.71007	1.3807	1.34699	1.44197	1.57066	2.43163	1.57832	1.50632	1.62083	0.347942	8	0.00380914	p<0.05
-54.9	0.320567	1.20912	0.294526	0.380314	0.418614	1.60283	1.32708	0.913444	0.808311	0.52222	8	1.69475	1.35465	1.57373	1.48181	1.53389	1.97511	1.65798	1.63041	1.61279	0.182007	8	0.00283264	p<0.05
-54.5	0.361932	1.01149	0.294526	0.674454	0.602453	1.70241	1.06051	0.830716	0.817312	0.451613	8	1.635	2.06242	1.66105	1.58445	1.54768	1.95365	1.68556	1.56454	1.7118	0.191025	8	0.000513753	p<0.05
-54.2	0.391036	0.967063	0.343545	0.876675	0.568748	1.38989	1.18307	0.777097	0.81214	0.369735	8	1.65185	1.96591	1.74377	1.70241	1.4864	1.68862	1.82803	1.58139	1.70605	0.14681	8	0.000122571	p<0.05
-53.8	0.619304	0.640749	0.354272	0.688241	0.634622	1.22903	1.33933	0.816929	0.79031	0.331879	8	1.36231	1.64573	1.70547	1.85714	1.58598	1.68096	2.03332	1.57373	1.68058	0.199676	8	3.61416e-05	p<0.05
-53.4	0.368059	0.705096	0.325163	0.660668	0.754119	1.15856	1.45117	0.591726	0.75182	0.381718	8	1.20605	1.53849	1.82497	1.49406	1.52164	2.09613	2.08234	1.52777	1.66143	0.311856	8	0.000147468	p<0.05
-53	0.219457	0.656072	0.346613	0.636154	0.444655	1.21678	1.48947	0.577939	0.698392	0.436251	8	1.34393	2.04404	1.65339	1.19073	1.47415	1.82191	1.91995	1.46496	1.61413	0.296934	8	0.000332719	p<0.05
-52.7	0.185751	0.800079	0.463042	0.637685	0.345082	1.09881	1.40214	0.682113	0.701838	0.398714	8	1.06817	2.00574	1.28725	1.10954	1.53236	2.00881	1.51858	1.5676	1.51226	0.359288	8	0.000794262	p<0.05
-52.3	0.220989	0.712755	0.429337	0.63309	0.476829	0.967063	1.06511	0.702032	0.650901	0.278389	8	1.09881	1.77442	1.26886	0.905785	1.76676	1.71007	1.28878	1.47568	1.41115	0.325161	8	0.000199935	p<0.05
-51.9	0.291458	0.902722	0.694368	0.407891	0.415551	0.999232	0.847566	0.754119	0.664113	0.261374	8	1.01149	1.66258	1.61662	0.682113	2.09919	1.57526	1.37304	1.31329	1.4167	0.432233	8	0.00131309	p<0.05
-51.5	0.438528	0.936422	0.804675	0.335886	0.338949	0.82612	0.970127	0.93489	0.698199	0.278306	8	1.20912	2.12218	1.28878	0.846034	2.17426	1.59977	1.57526	1.41593	1.52892	0.449544	8	0.000855326	p<0.05
-51.1	0.467638	0.833779	0.579471	0.315972	0.309845	0.729605	1.17848	1.13558	0.693795	0.339191	8	1.39601	1.75143	1.53849	0.996168	1.98736	1.9843	1.71007	1.66411	1.62849	0.325226	8	6.29371e-05	p<0.05
-50.8	0.545766	0.735732	0.392568	0.380314	0.444655	0.973191	1.33627	0.985445	0.724242	0.347075	8	1.40827	1.52624	1.9414	1.10341	2.24933	1.72386	1.7928	1.69322	1.67982	0.345836	8	7.59913e-05	p<0.05
-50.4	0.562621	0.881271	0.364995	0.452319	0.665263	1.07124	1.36078	0.858294	0.777098	0.333481	8	1.67024	1.33474	1.66565	1.32555	2.13903	1.76523	1.85101	1.44504	1.64956	0.277785	8	6.36239e-05	p<0.05
-50	0.574876	0.965531	0.404828	0.375718	0.720414	1.33627	1.33167	0.816929	0.81578	0.375908	8	1.78054	1.31482	1.42972	1.18154	2.07162	2.14975	1.96745	1.24282	1.64228	0.394782	8	0.000754114	p<0.05
-49.6	0.441592	1.42206	0.387973	0.351209	0.786288	1.58598	1.33474	0.804675	0.889314	0.49666	8	1.83876	1.50478	1.42666	1.09421	1.87093	2.11298	2.07468	1.16622	1.63615	0.394882	8	0.00527276	p<0.05
-49.2	0.271544	0.967063	0.280735	0.430869	0.57028	1.24588	1.28418	0.815397	0.733244	0.407723	8	1.54921	1.52317	1.28878	1.22597	2.162	2.3152	2.04711	1.11107	1.65281	0.461247	8	0.000875549	p<0.05
-48.9	0.240902	0.919572	0.294526	0.619304	0.551898	1.17235	1.23363	0.732669	0.720606	0.369822	8	1.14017	1.72539	1.54768	1.1555	1.82803	2.03638	1.97817	1.34546	1.5946	0.354054	8	0.000269324	p<0.05
-48.5	0.187283	0.904253	0.3987	0.482956	0.505938	1.04672	1.43738	0.67905	0.705285	0.404317	8	1.17388	1.93374	1.69781	1.19992	1.74377	2.38721	1.80199	1.38836	1.66584	0.406004	8	0.000315444	p<0.05
-48.1	0.335886	0.692836	0.470701	0.420146	0.510534	1.03294	1.50019	0.588662	0.693986	0.38963	8	1.20145	2.03638	1.75603	1.20145	1.88319	2.49751	1.48947	1.13558	1.65013	0.481956	8	0.000714843	p<0.05
-47.7	0.349677	0.715819	0.42321	0.447724	0.490615	0.924167	1.43585	0.522788	0.663731	0.362467	8	1.17541	1.88319	1.13252	1.29797	2.01341	2.38567	1.53543	1.27039	1.58675	0.458231	8	0.000599767	p<0.05
-47.3	0.259289	0.734201	0.311376	0.443123	0.513597	1.36538	1.37304	0.528916	0.691115	0.442638	8	1.58445	1.8694	1.01762	1.62428	2.03026	2.36576	1.74071	1.69935	1.74148	0.387966	8	0.000187679	p<0.05
-47	0.303717	0.749524	0.348145	0.279203	0.487551	1.16928	1.31329	0.666795	0.664689	0.395146	8	1.51245	1.67484	1.14017	1.74377	2.11605	2.33972	1.80046	1.94906	1.78456	0.368079	8	4.19085e-05	p<0.05
-46.6	0.498279	0.95634	0.430869	0.242434	0.489083	0.919572	1.34086	0.71735	0.699349	0.356952	8	1.53543	1.51704	1.29031	1.52624	2.34431	2.22941	1.92455	1.72846	1.76197	0.373119	8	4.47567e-05	p<0.05
-46.2	0.466106	0.801611	0.470701	0.289926	0.538107	1.18613	1.37763	0.815397	0.743202	0.379074	8	1.39448	1.59211	1.65032	1.28725	2.13137	2.3581	1.96131	1.8985	1.78418	0.368003	8	6.8904e-05	p<0.05
-45.8	0.389504	0.885866	0.283798	0.342013	0.816929	1.3332	1.3087	0.766374	0.765798	0.411831	8	1.03753	1.67331	2.29529	1.16163	1.84489	2.31674	1.83569	1.67484	1.72999	0.462447	8	0.00061873	p<0.05
-45.5	0.484488	1.06817	0.279203	0.380314	0.744923	1.16469	1.32401	0.626963	0.759096	0.386562	8	0.993104	1.47874	1.946	1.32095	1.59517	2.32287	1.78208	1.4527	1.61145	0.406547	8	0.000741271	p<0.05
-45.1	0.623899	1.25354	0.40636	0.492147	0.619304	1.06817	1.36231	0.649945	0.80946	0.3643	8	1.00076	1.41287	2.01187	1.26886	1.54309	1.75297	1.61815	1.53543	1.518	0.304897	8	0.000915849	p<0.05
-44.7	0.481424	1.20298	0.470701	0.420146	0.640749	1.21065	1.36844	0.677518	0.809077	0.386943	8	1.15243	1.55074	1.58751	1.22444	1.82344	1.84795	1.66718	1.53236	1.54826	0.251573	8	0.000686841	p<0.05
-44.3	0.467638	1.20145	0.559557	0.368059	0.561089	1.15703	1.24129	0.603985	0.770012	0.363814	8	1.25967	1.46343	1.11107	1.36078	1.74684	1.62735	1.60896	1.54462	1.46534	0.210829	8	0.000639098	p<0.05
-43.9	0.651477	1.20912	0.548835	0.381845	0.568748	1.05286	1.19839	0.729605	0.792609	0.318034	8	1.33167	1.58904	0.950208	1.13864	1.87093	1.89238	1.69016	1.70701	1.52125	0.345597	8	0.000628585	p<0.05
-43.6	0.559557	1.23669	0.528916	0.548835	0.597858	1.12179	1.05286	0.913444	0.819993	0.293526	8	1.51245	1.69935	1.01302	1.02375	1.91995	1.92302	1.61969	1.6442	1.54443	0.354258	8	0.000590964	p<0.05
-43.2	0.550366	1.20298	0.354272	0.675986	0.735732	1.07583	1.01302	0.803143	0.801418	0.28394	8	1.563	2.30295	1.10801	1.12179	1.80046	2.01034	1.48334	1.53849	1.61605	0.412334	8	0.000556972	p<0.05
-42.8	0.452319	1.27039	0.410955	0.824588	0.747987	1.04213	1.10341	0.50747	0.794907	0.323567	8	1.70547	1.65645	1.18001	1.39908	1.99502	2.47147	1.6825	1.40827	1.68728	0.401637	8	0.000269179	p<0.05
-42.4	0.296058	1.13711	0.306781	1.04519	0.558025	1.06051	1.00536	0.556494	0.745692	0.35361	8	1.77748	1.5247	1.14783	1.16469	1.8602	2.26465	1.87093	1.42512	1.62945	0.385009	8	0.000298258	p<0.05
-42	0.366527	0.983913	0.329758	0.740328	0.538107	1.12332	0.922635	0.619304	0.702987	0.290796	8	1.64726	1.58751	1.59364	1.09728	1.78514	2.18652	2.21716	1.66258	1.72214	0.35835	8	2.58181e-05	p<0.05
-41.7	0.525852	0.778629	0.459979	0.660668	0.48602	0.941017	0.994636	0.634622	0.685178	0.203144	8	1.57066	1.76216	1.90004	1.20605	2.14209	1.9797	2.545	1.71007	1.85197	0.397784	8	1.86951e-05	p<0.05
-41.3	0.467638	0.870548	0.59939	0.602453	0.516661	0.823056	1.1509	0.691304	0.715244	0.224562	8	1.67637	1.63807	2.45308	1.32861	2.04864	2.04711	2.59556	1.60589	1.92417	0.440837	8	3.38732e-05	p<0.05
-40.9	0.513597	0.859825	0.446192	0.487551	0.447724	1.03294	1.21984	0.689773	0.71218	0.296042	8	1.47874	1.76523	2.00268	1.38682	1.99042	1.84795	2.3918	1.54309	1.80084	0.331877	8	7.55476e-06	p<0.05
-40.5	0.407891	0.830716	0.467638	0.535043	0.467638	1.01149	1.36691	0.87208	0.744926	0.336552	8	1.65645	2.03026	1.39908	1.50785	1.89391	2.26311	1.99961	1.55228	1.78782	0.303087	8	1.44645e-05	p<0.05
-40.2	0.558025	1.0023	0.530448	0.463042	0.484488	1.30256	1.58904	0.977786	0.863462	0.424226	8	1.60436	1.94293	1.31942	1.38989	2.39027	2.27691	1.76369	1.59977	1.7859	0.391615	8	0.000488809	p<0.05
-39.8	0.577939	0.789351	0.355804	0.764842	0.475297	1.19839	1.65339	0.893526	0.838567	0.420414	8	1.69016	1.91383	1.49559	1.42512	2.35044	2.12524	1.88319	1.48793	1.79644	0.331917	8	0.000205226	p<0.05
-39.4	0.487551	0.91804	0.403296	0.528916	0.47836	1.16163	1.41747	0.999232	0.799311	0.37751	8	1.67637	1.80352	1.42819	1.60589	2.43623	2.00268	1.75143	1.29184	1.74952	0.354014	8	0.000138113	p<0.05
-39	0.441592	0.905785	0.44006	0.446192	0.533511	1.21065	1.20452	0.948676	0.766373	0.340321	8	1.67637	1.71467	1.2995	1.62428	2.5879	2.11758	1.52164	1.19073	1.71658	0.450176	8	0.000368647	p<0.05
-38.6	0.512066	0.954809	0.42321	0.528916	0.52432	1.12332	1.14171	1.01915	0.778438	0.307975	8	1.53849	1.57373	1.82957	2.02872	2.19418	2.56338	1.47415	1.08043	1.78533	0.467996	8	0.000261892	p<0.05
-38.3	0.450788	1.25048	0.548835	0.691304	0.426273	0.933358	1.2275	0.852166	0.797587	0.325722	8	1.3761	1.70394	1.57219	2.33359	1.63807	2.05783	1.35005	1.06205	1.63673	0.405672	8	0.000496594	p<0.05
-37.9	0.338949	1.06511	0.623899	0.660668	0.441592	1.17694	1.20298	0.772501	0.785331	0.330638	8	1.54002	1.50785	1.24282	2.11145	1.30716	1.92915	1.50172	1.3087	1.55611	0.310401	8	0.000281867	p<0.05
-37.5	0.262353	1.06971	0.631558	0.702032	0.479892	1.02068	1.1555	0.67905	0.750096	0.309846	8	1.62888	1.65492	1.29031	1.75143	1.32708	1.95519	1.71161	1.44657	1.59575	0.226522	8	3.25646e-05	p<0.05
-37.1	0.386441	0.947144	0.610113	0.787819	0.619304	0.881271	1.19533	0.649945	0.75967	0.248978	8	1.5676	1.48181	1.46189	1.63807	1.47568	2.55266	1.69628	1.56607	1.68001	0.362091	8	6.09279e-05	p<0.05
-36.7	0.42321	0.783224	0.800079	0.582535	0.659136	0.864421	1.33167	0.562621	0.750862	0.276003	8	1.50019	1.39142	1.29644	1.43891	1.8648	2.54347	1.55994	1.65492	1.65626	0.398411	8	0.000170505	p<0.05
-36.4	0.407891	0.775565	0.798542	0.539639	0.554962	0.951745	1.38682	0.663732	0.759862	0.305953	8	1.76369	1.32248	1.31176	1.38682	2.43163	2.18192	1.73458	1.82803	1.74512	0.407822	8	0.000108708	p<0.05
-36	0.452319	0.884335	0.551898	0.312908	0.473765	1.05286	1.32095	0.636154	0.710648	0.344661	8	1.69628	1.27346	1.55381	1.31789	2.63998	1.98736	1.89544	1.75143	1.76446	0.434755	8	0.000117173	p<0.05
-35.6	0.518193	0.976254	0.504407	0.243971	0.48602	1.48334	1.3761	0.723478	0.78897	0.448702	8	1.20605	1.45117	1.68556	1.26886	2.30601	3.02758	2.02719	1.61815	1.82382	0.610947	8	0.00200506	p<0.05
-35.2	0.666795	1.16163	0.401764	0.164306	0.47836	1.14171	1.25661	0.617772	0.736117	0.403641	8	1.17848	2.06549	1.71927	1.47415	2.02719	2.44389	2.0563	1.51398	1.80984	0.410993	8	0.000118158	p<0.05
-34.8	0.614708	1.12486	0.323631	0.286862	0.7005	0.764842	1.23669	0.58713	0.704902	0.339096	8	1.25661	2.35044	1.50478	1.419	2.29376	2.12983	2.13137	1.81578	1.8627	0.424561	8	3.8058e-05	p<0.05
-34.5	0.455383	1.0314	0.315972	0.502875	0.891994	0.666795	1.3424	0.770969	0.747224	0.336757	8	1.68862	2.01494	1.40367	1.29797	2.17426	2.25699	2.18499	2.19111	1.90157	0.384573	8	1.83289e-05	p<0.05
-34.1	0.509002	0.777097	0.470701	0.515129	0.746455	0.752587	1.29644	0.812334	0.734968	0.265296	8	1.64573	1.93068	1.491	1.41134	2.00268	2.11298	2.32133	2.15894	1.88433	0.331701	8	3.06248e-06	p<0.05
-33.7	0.665263	0.766374	0.343545	0.591726	0.694368	0.93489	1.16775	0.823056	0.748372	0.243433	8	1.84795	1.5676	1.56454	1.40674	1.88931	2.12371	2.27537	1.97664	1.83148	0.299623	8	1.97024e-06	p<0.05
-33.3	0.689773	0.683645	0.392568	0.659136	0.556494	1.07124	1.26733	0.890462	0.776331	0.284479	8	1.75143	1.55381	1.74837	1.54309	2.06549	2.07928	2.17733	1.76216	1.83512	0.243212	8	1.60215e-06	p<0.05
-33	0.48602	0.827652	0.443123	0.646876	0.455383	1.08196	1.44963	0.769438	0.770011	0.351361	8	1.77135	1.39295	1.58445	1.54921	2.38414	2.018	2.03638	1.74531	1.81022	0.321302	8	2.48169e-05	p<0.05
-32.6	0.29759	0.996168	0.424742	0.469169	0.542702	1.13558	1.50785	0.864421	0.779778	0.417803	8	1.50785	1.54309	1.55074	1.31482	2.34431	2.17579	2.07009	1.69628	1.77537	0.371335	8	0.000189072	p<0.05
-32.2	0.311376	1.10034	0.395637	0.401764	0.519725	1.24741	1.39295	0.928763	0.787246	0.430392	8	1.48947	1.62888	1.38223	1.48487	2.19111	1.96438	2.07162	1.81884	1.75393	0.30159	8	0.000191527	p<0.05
-31.8	0.33129	0.979318	0.357336	0.433932	0.490615	0.869016	1.31176	0.979318	0.719073	0.363307	8	1.5676	1.78054	1.34852	1.54768	1.9414	1.89544	2.17579	1.93068	1.77346	0.268235	8	1.78281e-05	p<0.05
-31.4	0.337417	0.792415	0.387973	0.602453	0.548835	1.1555	1.24435	0.954809	0.752969	0.341428	8	1.5247	1.79739	1.45576	1.75297	1.99196	1.89084	2.34278	2.0563	1.85159	0.288002	8	7.78364e-06	p<0.05
-31.1	0.361932	0.928763	0.322099	0.334354	0.381845	1.36691	1.24741	0.844502	0.723477	0.431815	8	1.66565	1.81578	1.47568	1.71314	2.12064	1.9797	2.1712	1.85101	1.8491	0.235201	8	4.95465e-05	p<0.05
-30.7	0.420146	0.948676	0.291458	0.280735	0.505938	1.11567	1.40367	0.617772	0.698008	0.413206	8	1.74531	1.85101	1.67943	1.59058	2.47147	2.87591	2.17273	1.77135	2.01972	0.451341	8	2.7919e-05	p<0.05
-30.3	0.571812	1.11873	0.386441	0.351209	0.613176	1.02375	1.70854	0.630026	0.80046	0.45754	8	1.80658	1.77901	1.87399	1.66411	2.10226	2.09307	2.27537	1.57526	1.89621	0.240271	8	0.000104927	p<0.05
-29.9	0.663732	1.09881	0.426273	0.26848	0.530448	1.1892	1.70701	0.610113	0.811757	0.479849	8	1.64266	1.55074	1.64573	1.66871	2.00574	1.73458	2.33972	1.83723	1.80314	0.258327	8	0.000345649	p<0.05
-29.5	0.735732	1.0743	0.493679	0.567216	0.737264	1.31942	1.33474	0.628494	0.861355	0.335168	8	1.68709	1.50478	1.4864	1.82038	2.0946	1.88625	2.12218	1.81884	1.80257	0.238143	8	2.38926e-05	p<0.05
-29.2	0.708159	0.824588	0.319035	0.456915	0.79701	1.14937	1.28265	0.449256	0.748372	0.341172	8	1.55381	1.45423	1.78361	1.65185	2.31674	2.06856	1.89697	1.60283	1.79107	0.290115	8	1.38173e-05	p<0.05
-28.8	0.519725	0.72501	0.334354	0.308313	0.87208	1.12486	1.36844	0.558025	0.726351	0.376406	8	1.86327	1.67484	1.90769	1.25661	2.08694	1.85254	1.99502	1.45576	1.76158	0.281923	8	3.11444e-05	p<0.05
-28.4	0.562621	0.867484	0.418614	0.348145	0.787819	0.9977	1.49406	0.680582	0.769628	0.366132	8	1.69935	1.97664	1.76982	1.28725	1.97051	2.55419	2.15281	1.37916	1.84872	0.411553	8	7.63926e-05	p<0.05
-28	0.602453	0.964	0.391036	0.446192	0.600922	0.908849	1.67637	0.879739	0.808695	0.411202	8	1.41134	1.47415	1.78514	1.43585	2.31367	2.33359	2.2478	1.46189	1.80793	0.423079	8	0.00028836	p<0.05
-27.7	0.476829	0.970127	0.325163	0.432401	0.688241	0.82612	1.44504	0.770969	0.741861	0.357977	8	1.44044	1.65492	1.86787	1.4481	2.2049	2.59402	2.3152	1.65339	1.89736	0.428334	8	4.74284e-05	p<0.05
-27.3	0.42321	0.878207	0.322099	0.334354	0.596321	0.867484	1.36844	0.643813	0.679241	0.352583	8	1.2275	1.88625	2.10685	1.69322	1.93374	2.03179	2.60168	1.47568	1.86959	0.417733	8	2.80388e-05	p<0.05
-26.9	0.463042	0.801611	0.602453	0.397169	0.519725	0.85523	1.33933	0.58713	0.695712	0.303699	8	1.35159	1.70701	2.2478	1.59058	1.93834	1.98889	2.46994	1.61969	1.86423	0.369796	8	8.82826e-06	p<0.05
-26.5	0.55343	0.891994	0.502875	0.31444	0.498279	0.896589	1.22903	0.642281	0.691115	0.29466	8	1.59058	1.63041	1.88472	1.51858	1.91383	2.08081	2.26311	1.71161	1.8242	0.25868	8	1.19454e-06	p<0.05
-26.1	0.515129	0.806206	0.430869	0.302185	0.446192	0.974722	1.21371	0.608581	0.6622	0.310958	8	1.69935	1.84642	1.6442	1.45423	1.98583	2.19877	1.99808	2.05783	1.86059	0.246697	8	9.1682e-07	p<0.05
-25.8	0.597858	0.870548	0.389504	0.378782	0.466106	0.968595	1.19686	0.657604	0.690732	0.29615	8	1.94753	2.08541	1.8602	1.48028	2.21256	2.11298	1.97051	2.35657	2.00325	0.263377	8	2.33307e-07	p<0.05
-25.4	0.512066	0.911912	0.412487	0.259289	0.472233	0.936422	1.07736	0.705096	0.660859	0.291563	8	1.40827	1.65339	1.75603	1.45423	2.11298	1.94906	2.08847	2.19418	1.82708	0.304569	8	1.7961e-06	p<0.05
-25	0.348145	0.786288	0.355804	0.501343	0.450788	0.902722	1.10647	0.610113	0.63271	0.275023	8	1.22137	1.67943	1.70701	1.47108	2.43317	1.69475	2.11605	1.72692	1.75622	0.371878	8	1.18439e-05	p<0.05
-24.6	0.326695	0.823056	0.504407	0.702032	0.625431	1.11567	1.13711	0.675986	0.738798	0.280484	8	1.28112	1.95519	2.08081	1.67943	2.29529	1.92761	2.09613	1.59058	1.86327	0.326854	8	3.92933e-06	p<0.05
-24.2	0.308313	0.76331	0.444655	0.533511	0.770969	0.910381	1.16775	0.755651	0.706818	0.272858	8	1.55534	2.04251	1.92302	1.96438	2.32593	2.00421	2.00268	1.58751	1.9257	0.250416	8	2.39015e-07	p<0.05
-23.9	0.449256	0.887398	0.299122	0.375718	0.651477	1.2229	1.26886	0.849098	0.750479	0.371308	8	1.43738	2.46227	1.99502	2.02107	2.13903	2.01341	1.9797	1.78973	1.9797	0.290699	8	4.85961e-06	p<0.05
-23.5	0.55343	0.755651	0.23937	0.389504	0.694368	1.35005	1.07277	0.919572	0.74684	0.363591	8	1.47108	2.42091	2.01953	2.00268	2.25545	2.39793	2.01034	1.69169	2.0337	0.331013	8	3.51779e-06	p<0.05
-23.1	0.706628	0.715819	0.312908	0.548835	0.6959	1.39448	1.09575	0.867484	0.792225	0.332078	8	1.78667	2.0563	1.70088	2.18499	2.13596	2.52968	2.07468	1.60589	2.00938	0.300384	8	2.30847e-06	p<0.05
-22.7	0.608581	0.979318	0.509002	0.640749	0.731137	1.29644	1.09268	0.858294	0.839525	0.269017	8	2.19418	1.85867	1.60436	1.79739	1.8602	2.00574	2.23095	1.71773	1.90865	0.220742	8	6.82178e-07	p<0.05
-22.3	0.493679	0.79701	0.565685	0.72501	0.766374	1.14324	1.02987	0.898121	0.802374	0.219003	8	1.97664	1.89697	1.5676	1.87399	1.89391	2.10992	2.48372	1.70701	1.93872	0.274418	8	4.04334e-07	p<0.05
-22	0.426273	0.867484	0.495211	0.783224	0.792415	1.11107	1.05286	0.861357	0.798736	0.239617	8	2.26158	1.8311	1.33167	1.87399	2.07468	1.85714	2.61394	1.96285	1.97587	0.370158	8	6.79284e-06	p<0.05
-21.6	0.420146	0.999232	0.421678	0.561089	0.856762	0.908849	1.10494	0.882803	0.769438	0.265015	8	1.89084	1.82191	1.34086	1.83569	1.98889	2.41325	2.46227	1.88012	1.95423	0.356028	8	4.31674e-06	p<0.05
-21.2	0.414019	0.924167	0.46151	0.409423	0.63309	1.0789	1.10954	0.885866	0.739564	0.295474	8	1.49406	1.77595	1.45117	1.7545	2.39793	2.41631	2.34125	1.76676	1.92474	0.400868	8	1.47348e-05	p<0.05
-20.8	0.516661	0.885866	0.250098	0.564153	0.602453	1.01762	1.04519	0.847566	0.716201	0.277297	8	1.42666	1.95519	1.42053	1.76523	2.45461	2.57717	2.17579	1.93068	1.96323	0.428674	8	1.64161e-05	p<0.05
-20.5	0.386441	0.904253	0.303717	0.349677	0.565685	0.869016	0.999232	0.864421	0.655305	0.284606	8	1.3087	1.88012	1.39755	2.01187	2.72731	2.42551	2.21256	2.11605	2.00996	0.481553	8	2.34933e-05	p<0.05
-20.1	0.319035	0.905785	0.374186	0.270012	0.682113	1.13098	1.02068	0.734201	0.679625	0.330644	8	0.988509	1.80505	1.74837	1.67484	2.61853	2.07009	2.36576	2.04864	1.91497	0.492221	8	6.7514e-05	p<0.05
-19.7	0.420146	0.890462	0.421678	0.320567	0.634622	1.21371	1.05592	0.697432	0.706817	0.323047	8	0.90119	1.68556	1.88319	1.4481	2.28916	1.946	2.60168	1.90616	1.83263	0.515163	8	0.000222796	p<0.05
-19.3	0.420146	1.1126	0.378782	0.37725	0.545766	1.34852	1.06817	0.63309	0.735542	0.383629	8	1.04979	2.01953	1.9414	1.50632	2.52049	2.06242	2.53121	1.78973	1.92761	0.494214	8	0.000117381	p<0.05
-18.9	0.46151	0.967063	0.302185	0.302185	0.525852	1.58292	1.17541	0.7005	0.752203	0.456508	8	1.25967	2.56798	1.83569	1.81731	2.25392	2.04404	2.37342	1.80658	1.99483	0.409548	8	5.43622e-05	p<0.05
-18.6	0.513597	0.988509	0.291458	0.338949	0.516661	1.20912	1.28878	0.688241	0.729414	0.386918	8	1.6825	2.48679	1.71314	1.81884	2.22022	2.22788	2.13596	1.80658	2.01149	0.29475	8	4.63033e-06	p<0.05
-18.2	0.689773	1.02375	0.337417	0.383377	0.456915	1.02528	1.19226	0.6959	0.725583	0.324836	8	1.86327	2.38414	1.73765	1.99502	2.52355	2.37342	2.19418	1.9368	2.126	0.283687	8	3.0627e-07	p<0.05
-17.8	0.737264	1.17082	0.407891	0.630026	0.55343	0.985445	1.17235	0.839907	0.812141	0.282419	8	1.79893	1.91536	2.03638	2.11758	2.14209	2.21103	2.64458	2.18805	2.13175	0.250556	8	1.21881e-07	p<0.05
-17.4	0.721946	1.19686	0.450788	0.594789	0.565685	0.931826	1.19073	0.976254	0.828609	0.287133	8	1.45883	1.47415	1.83569	1.91536	2.10379	2.47606	2.89889	2.473	2.07947	0.510204	8	8.29612e-05	p<0.05
-17	0.737264	1.31329	0.40636	0.455383	0.458447	0.942549	1.19839	1.0069	0.814822	0.35413	8	1.42512	1.49866	1.86787	1.84795	2.01341	2.6553	2.46074	1.99042	1.96993	0.423783	8	4.27568e-05	p<0.05
-16.7	0.581003	0.994636	0.656072	0.303717	0.593257	1.03753	1.08502	0.927231	0.772309	0.278596	8	1.49406	1.79586	1.95519	1.8265	1.68403	2.50976	2.44542	1.90004	1.95136	0.354344	8	4.63093e-06	p<0.05
-16.3	0.548835	0.827652	0.675986	0.323631	0.617772	1.41747	1.08043	0.800079	0.786481	0.337597	8	1.61969	1.8648	1.87553	1.89697	1.6779	2.33512	2.29222	2.2049	1.97089	0.274038	8	2.74683e-06	p<0.05
-15.9	0.467638	1.1172	0.443123	0.418614	0.630026	1.29644	1.07124	0.816929	0.78265	0.344484	8	1.58598	1.85714	1.77748	1.56913	1.76676	2.26618	2.12371	1.84029	1.84833	0.241728	8	8.93984e-06	p<0.05
-15.5	0.463042	1.04213	0.504407	0.469169	0.59939	1.72999	1.15397	0.816929	0.847377	0.444287	8	1.54615	2.0517	1.48181	1.78667	2.0517	1.85101	2.22482	1.67943	1.83416	0.262092	8	0.000191341	p<0.05
-15.2	0.401764	1.00843	0.559557	0.493679	0.568748	1.73918	1.38836	0.819993	0.872463	0.47716	8	1.50938	2.30448	1.5247	2.02413	2.23401	1.85561	2.03332	1.65339	1.89238	0.308012	8	0.000273023	p<0.05
-14.8	0.430869	0.913444	0.351209	0.619304	0.649945	1.34546	1.45423	0.749524	0.814248	0.402168	8	1.33474	2.22635	1.47262	1.7208	2.06396	1.74531	1.82957	1.88165	1.78437	0.290308	8	0.000104195	p<0.05
-14.4	0.574876	0.821525	0.456915	0.672922	0.731137	1.28418	1.46036	0.714287	0.839526	0.34951	8	1.44044	1.93068	1.5293	1.95825	2.11605	1.90769	1.99808	2.14668	1.8784	0.258131	8	1.39813e-05	p<0.05
-14	0.79701	1.07277	0.590194	0.669859	0.539639	1.23669	1.72233	0.878207	0.938337	0.395973	8	1.92761	1.7545	1.71161	2.50976	2.21256	2.11758	2.17733	2.05477	2.05821	0.260461	8	2.15751e-05	p<0.05
-13.6	0.964	0.925699	0.738796	0.864421	0.613176	1.39755	1.71927	0.777097	1	0.371893	8	1.89391	1.72539	1.72999	2.46074	2.43776	2.41018	2.23554	2.04711	2.11758	0.311412	8	1.5803e-05	p<0.05
-13.3	0.849098	0.913444	0.660668	0.743391	0.548835	1.01762	1.43278	0.714287	0.860016	0.274457	8	2.10838	1.5293	1.94906	2.15434	2.50976	2.7748	2.12371	2.13443	2.16047	0.367862	8	2.24985e-06	p<0.05
-12.9	0.743391	1.20145	0.617772	0.682113	0.600922	0.922635	1.06971	0.6622	0.812524	0.225712	8	2.14515	1.94446	1.88931	1.78514	2.42244	2.6553	2.17733	2.02107	2.13003	0.289602	8	1.31163e-07	p<0.05
-12.5	0.761778	1.32861	0.626963	0.574876	0.746455	0.991572	0.945613	0.634622	0.826311	0.251877	8	2.0517	2.18345	1.82957	1.83876	2.27231	2.8851	2.38108	1.82803	2.15875	0.362946	8	1.47561e-06	p<0.05
-12.1	0.738796	1.10801	0.622367	0.519725	0.706628	1.23516	1.0314	0.708159	0.833781	0.256252	8	1.9797	2.30601	1.87553	1.64266	2.21256	3.29414	2.76101	1.82191	2.23669	0.55031	8	6.89977e-05	p<0.05
-11.7	0.755651	1.09728	0.498279	0.672922	0.830716	1.37457	1.08502	0.835311	0.893719	0.277956	8	1.60283	1.7545	1.78514	1.62581	2.32133	3.12562	3.01225	1.69475	2.11528	0.630871	8	0.000594257	p<0.05
-11.4	0.72501	0.925699	0.303717	0.907317	0.751056	1.58292	1.01149	0.76331	0.871315	0.358565	8	1.56454	1.74071	1.77901	1.84029	2.19264	2.81156	3.15166	1.87859	2.11988	0.567332	8	0.000210623	p<0.05
-11	0.698969	1.09115	0.378782	0.936422	0.706628	1.43891	1.06817	0.937953	0.907124	0.317823	8	1.66105	2.07775	1.64113	1.63041	2.37342	2.33512	2.59096	2.4684	2.09728	0.401958	8	1.61325e-05	p<0.05
-10.6	0.743391	1.09268	0.535043	0.905785	0.646876	1.54002	1.11107	0.913444	0.936039	0.316887	8	1.50172	2.17579	1.70701	1.61509	2.35503	2.56032	2.15588	2.50517	2.072	0.41252	8	3.20064e-05	p<0.05
-10.2	0.800079	0.795479	0.527384	0.881271	0.603985	1.38529	1.13405	0.870548	0.874761	0.276143	8	1.58904	1.83723	1.65952	1.57832	2.27384	2.29988	2.3198	2.52815	2.01072	0.384398	8	1.44539e-05	p<0.05
-9.8	0.876675	0.983913	0.565685	0.959404	0.626963	1.56147	1.2275	0.79701	0.949828	0.323591	8	1.60283	1.64573	1.7162	1.73152	2.00881	2.66449	2.3581	2.17886	1.98832	0.384825	8	4.8077e-05	p<0.05
-9.5	0.71735	0.954809	0.752587	0.819993	0.666795	1.39908	1.10801	0.853698	0.90904	0.242816	8	1.65952	1.9123	1.59058	1.74377	1.78667	2.60628	2.43163	1.83416	1.94561	0.370353	8	2.38554e-05	p<0.05
-9.1	0.849098	1.19992	0.623899	0.665263	0.735732	1.3807	1.10801	0.919572	0.935273	0.271405	8	1.65492	1.70701	1.52777	1.8311	1.9123	2.40865	2.4638	1.71007	1.90195	0.349164	8	3.09746e-05	p<0.05
-8.7	0.71735	1.1509	0.640749	0.455383	0.721946	1.25048	1.18613	0.950208	0.884143	0.292312	8	1.64726	1.91383	1.42206	1.82803	2.0517	2.59249	2.545	1.56913	1.94619	0.432379	8	8.26942e-05	p<0.05
-8.3	0.47836	0.93489	0.565685	0.342013	0.738796	1.07124	1.06358	0.849098	0.755457	0.272457	8	1.79433	1.59058	1.40981	1.86327	2.36882	2.52049	2.36116	1.56147	1.93374	0.426198	8	2.68503e-05	p<0.05
-8	0.436996	0.827652	0.607049	0.342013	0.911912	0.864421	0.908849	0.895057	0.724244	0.230268	8	1.98889	1.62581	1.64266	2.07622	2.53581	2.39027	2.2478	1.76676	2.03428	0.342145	8	9.56683e-07	p<0.05
-7.6	0.54117	0.798542	0.509002	0.389504	0.812334	0.950208	0.844502	0.933358	0.722328	0.211929	8	1.97817	1.87859	1.87706	2.07162	2.42551	2.24167	1.94293	1.73152	2.01838	0.222825	8	1.04661e-08	p<0.05
-7.2	0.67905	0.833779	0.37725	0.354272	0.836843	1.04979	1.07277	0.792415	0.749521	0.270182	8	1.81884	2.14209	1.86327	2.12064	2.37495	2.1666	1.76676	1.73612	1.99866	0.232571	8	1.26645e-07	p<0.05
-6.8	0.744923	0.875144	0.248566	0.343545	0.697432	0.970127	1.27805	0.740328	0.737265	0.329759	8	1.76982	2.02413	1.43585	1.93068	2.49751	2.19724	1.8602	1.70701	1.9278	0.322213	8	3.89916e-06	p<0.05
-6.4	0.752587	0.801611	0.303717	0.357336	0.708159	1.05286	1.37151	0.671391	0.752395	0.346801	8	1.47415	2.04251	1.35159	1.98123	2.20949	2.51129	2.30907	1.3761	1.90693	0.450382	8	6.48839e-05	p<0.05
-6.1	0.671391	0.823056	0.490615	0.568748	0.895057	1.18001	1.44351	0.795479	0.858482	0.317686	8	1.23822	2.05017	1.35005	1.88625	2.09	2.32133	2.34125	1.25661	1.81674	0.467507	8	0.000405449	p<0.05
-5.7	0.584066	0.899653	0.482956	0.659136	0.816929	1.22137	1.40367	0.712755	0.847568	0.318185	8	1.35465	1.83876	1.54155	1.76829	1.92149	2.50057	2.19571	1.46189	1.82286	0.385434	8	8.58716e-05	p<0.05
-5.3	0.613176	0.941017	0.669859	0.692836	0.769438	1.52777	1.36538	0.891994	0.933933	0.337723	8	1.20145	1.81731	1.64266	1.86174	1.93221	2.3244	2.19877	1.59211	1.82133	0.354198	8	0.000154501	p<0.05
-4.9	0.55343	1.05132	0.757183	0.625431	0.6959	1.41747	1.13558	0.767906	0.875527	0.296738	8	1.19226	1.8311	1.50325	1.83416	2.27844	2.22635	2.18652	1.92302	1.87189	0.376716	8	5.00325e-05	p<0.05
-4.5	0.374186	1.16316	0.862889	0.498279	0.757183	1.41287	1.10954	0.671391	0.856187	0.353095	8	1.59364	1.46955	1.44044	2.07315	2.18192	2.41785	2.09613	2.26925	1.94274	0.383249	8	3.99217e-05	p<0.05
-4.2	0.476829	1.00383	0.781692	0.573344	0.754119	1.25201	0.996168	0.67905	0.81463	0.255094	8	1.7545	1.35772	1.55534	2.08388	1.89544	2.17579	2.03945	1.96745	1.85369	0.280501	8	2.08925e-06	p<0.05
-3.8	0.611644	0.789351	0.446192	0.636154	0.617772	1.44351	0.876675	0.786288	0.775948	0.301511	8	1.59517	1.82191	1.47721	2.15741	1.59211	2.16353	1.88472	1.51704	1.77614	0.275792	8	7.36234e-06	p<0.05
-3.4	0.50747	1.02528	0.320567	0.677518	0.691304	1.44963	0.939485	0.856762	0.808502	0.345816	8	1.18307	1.55074	1.53236	2.35503	1.86787	2.12218	2.01494	1.43278	1.75737	0.395932	8	0.000169335	p<0.05
-3	0.389504	0.95634	0.296058	0.400232	0.672922	1.57219	0.852166	0.887398	0.753352	0.416123	8	1.09421	1.62122	1.4144	2.22329	1.92302	2.28916	2.27691	1.58904	1.80391	0.44468	8	0.000246705	p<0.05
-2.7	0.354272	0.908849	0.332822	0.274607	0.476829	1.58751	0.973191	0.927231	0.729414	0.452888	8	1.31482	1.70547	1.23209	2.29529	1.83416	2.32593	2.20337	1.70701	1.82727	0.423477	8	0.000194206	p<0.05
-2.3	0.436996	0.806206	0.305249	0.171965	0.435464	1.62275	1.21831	1.08196	0.759862	0.51024	8	1.3424	1.89238	1.36385	1.75297	1.67024	2.22482	2.2478	1.68096	1.77193	0.34144	8	0.000522553	p<0.05
-1.9	0.418614	0.747987	0.415551	0.305249	0.528916	1.419	1.27193	1.05592	0.770395	0.427381	8	1.29337	1.87859	1.36385	1.68403	1.81425	2.25086	2.22635	1.94293	1.80678	0.352915	8	0.000128757	p<0.05
-1.5	0.551898	0.683645	0.463042	0.417082	0.564153	1.53389	1.20298	0.944081	0.795098	0.398649	8	1.19533	1.68709	1.28418	1.59364	1.99042	2.39333	2.01953	1.82038	1.74799	0.396828	8	0.000287116	p<0.05
-1.1	0.605517	0.731137	0.498279	0.436996	0.711223	1.43125	1.19686	0.965531	0.822099	0.349024	8	1.30716	1.42206	1.25201	1.77288	2.28916	2.03485	1.77442	1.59211	1.68058	0.360748	8	0.000264206	p<0.05
-0.8	0.470701	0.830716	0.3941	0.369591	0.870548	1.41593	1.2229	1.06358	0.829759	0.393696	8	1.13558	1.54615	1.419	1.81272	2.19418	1.7162	1.6779	1.20452	1.58828	0.343203	8	0.00110543	p<0.05
-0.4	0.384909	0.983913	0.342013	0.3987	0.758715	1.42819	1.38836	0.913444	0.82478	0.435457	8	1.10954	2.02872	1.38989	1.57679	1.99808	1.55381	2.00268	1.37916	1.62983	0.345056	8	0.00120031	p<0.05
0	0.443123	0.974722	0.273076	0.3987	0.559557	1.31789	1.62581	0.683645	0.784566	0.480506	8	1.39448	1.64879	1.43278	1.54309	1.87246	1.74071	1.96438	1.6105	1.6509	0.200718	8	0.00099593	p<0.05
0.4	0.308313	0.757183	0.392568	0.292989	0.559557	1.16622	1.47874	0.648413	0.700498	0.424777	8	1.11567	1.8602	1.46649	1.64573	1.94753	1.60283	2.11298	1.72846	1.68498	0.308187	8	0.000151213	p<0.05
0.8	0.256226	0.637685	0.415551	0.407891	0.614708	0.945613	1.42666	0.630026	0.666795	0.370089	8	1.13405	1.68403	1.22444	1.96131	1.87399	1.57066	2.34278	1.93987	1.71639	0.401881	8	9.01794e-05	p<0.05
1.1	0.173497	0.839907	0.271544	0.435464	0.648413	1.17082	1.42206	0.654541	0.70203	0.430625	8	1.28571	1.92149	1.15243	1.87399	1.8311	1.85101	2.43929	1.83569	1.77384	0.398594	8	0.000145871	p<0.05
1.5	0.236307	0.789351	0.403296	0.551898	0.674454	1.25201	1.30103	0.675986	0.735542	0.376077	8	1.29337	1.60896	1.10187	1.64266	2.30448	1.92915	2.10685	1.52011	1.68843	0.405215	8	0.000249326	p<0.05
1.9	0.233243	0.93489	0.496747	0.703564	0.703564	1.27193	1.07277	0.672922	0.761203	0.327588	8	1.34393	1.42053	1.40521	1.23363	2.41172	1.9031	1.77595	1.4481	1.61777	0.391374	8	0.000339045	p<0.05
2.3	0.282267	0.893526	0.499811	0.649945	0.548835	1.19533	0.896589	0.605517	0.696477	0.285409	8	1.37151	1.65339	1.53236	1.17388	2.37189	2.2003	1.70547	1.44504	1.68173	0.410416	8	0.000104444	p<0.05
2.7	0.371123	0.778629	0.456915	0.718882	0.55343	1.25354	0.858294	0.562621	0.694179	0.279115	8	1.19992	1.79739	1.57373	1.17541	2.29222	2.44236	1.6442	1.36997	1.6869	0.472559	8	0.000303588	p<0.05
3	0.443123	0.781692	0.464574	0.819993	0.464574	1.28725	0.784756	0.683645	0.7162	0.279826	8	0.948676	2.05477	1.71007	1.21371	2.09919	2.05936	1.67024	1.52011	1.65952	0.420128	8	0.000182971	p<0.05
3.4	0.369591	0.849098	0.533511	0.594789	0.455383	1.51245	0.82612	0.682113	0.727882	0.35859	8	0.905785	1.9843	1.14783	1.13558	1.95212	2.15741	1.87859	1.55074	1.58904	0.472611	8	0.00122961	p<0.05
3.8	0.352741	0.793947	0.368059	0.429337	0.392568	1.27499	1.01915	0.596321	0.653389	0.345008	8	1.13405	1.86174	1.3087	1.32861	1.99196	2.03332	2.23401	1.86787	1.72003	0.404261	8	6.27468e-05	p<0.05
4.2	0.345082	0.628494	0.248566	0.392568	0.430869	1.12026	1.04672	0.767906	0.622559	0.328479	8	1.45576	1.8311	1.27959	1.62275	1.56607	1.92761	2.22329	1.91842	1.72807	0.303441	8	6.54285e-06	p<0.05
4.5	0.364995	0.516661	0.340481	0.495211	0.432401	1.08502	1.05745	0.815397	0.638453	0.304178	8	1.50172	1.78973	1.37763	1.73612	1.47415	1.96745	1.73305	1.66871	1.65607	0.193376	8	4.12155e-06	p<0.05
4.9	0.292989	0.533511	0.392568	0.564153	0.33129	1.13864	1.06971	0.85523	0.647261	0.332357	8	1.32708	2.25086	1.77595	1.49406	1.4864	1.48334	1.46649	1.40827	1.58656	0.297594	8	3.69645e-05	p<0.05
5.3	0.438528	0.838375	0.368059	0.342013	0.319035	1.0743	1.06205	0.919572	0.670241	0.334513	8	1.1846	1.57832	1.87706	1.33933	1.67177	1.55841	1.48181	1.2229	1.48928	0.233822	8	8.75533e-05	p<0.05
5.7	0.381845	0.692836	0.459979	0.175029	0.459979	1.14171	0.9977	0.795479	0.638069	0.328253	8	1.25048	1.50785	1.80812	1.46955	1.81884	1.75143	1.76982	1.40521	1.59766	0.216647	8	1.56168e-05	p<0.05
6.1	0.489083	1.02375	0.355804	0.158179	0.495211	1.18767	0.957872	0.614708	0.660284	0.359016	8	1.51245	1.71161	1.79433	1.43585	1.93834	1.95978	1.93987	1.34852	1.70509	0.244698	8	1.63964e-05	p<0.05
6.4	0.452319	0.950208	0.300654	0.237839	0.366527	1.24435	1.1463	0.499811	0.649751	0.400643	8	1.76982	1.64113	1.54002	1.53389	1.9031	2.02107	1.82038	1.49406	1.71543	0.19304	8	4.67716e-05	p<0.05
6.8	0.417082	0.625431	0.165838	0.323631	0.25163	1.3378	1.18154	0.564153	0.608388	0.431543	8	1.74531	1.7882	1.2612	1.68556	2.22635	2.14362	1.78514	1.563	1.7748	0.306521	8	3.47613e-05	p<0.05
7.2	0.352741	0.605517	0.217925	0.444655	0.3941	0.9977	1.03447	0.510534	0.569705	0.297913	8	1.55534	1.77288	0.999232	1.7928	1.9368	1.96131	1.73458	1.55074	1.66296	0.307707	8	4.45307e-06	p<0.05
7.6	0.357336	0.476829	0.414019	0.346613	0.464574	1.20298	0.999232	0.567216	0.6036	0.319629	8	1.35159	1.84642	1.16622	1.61815	1.72846	1.92608	1.81884	1.54462	1.62505	0.261778	8	7.7718e-06	p<0.05
8	0.343545	0.605517	0.404828	0.464574	0.562621	1.4144	1.04366	0.584066	0.677902	0.365556	8	1.25354	1.99196	1.25508	1.50478	1.93987	1.92302	1.75143	1.34393	1.62045	0.31774	8	8.32102e-05	p<0.05
8.3	0.345082	0.708159	0.300654	0.433932	0.590194	1.18767	1.00843	0.6622	0.654539	0.313096	8	1.28878	1.48028	1.1892	1.59211	1.75143	2.15741	1.80505	1.47108	1.59192	0.309791	8	3.14911e-05	p<0.05
8.7	0.484488	0.774033	0.243971	0.545766	0.515129	1.24588	0.937953	0.685177	0.67905	0.309186	8	1.44197	1.29337	1.36078	1.52624	2.17273	2.52815	1.83876	1.55687	1.71486	0.434982	8	0.000115132	p<0.05
9.1	0.426273	0.924167	0.33129	0.441592	0.545766	0.988509	0.964	0.793947	0.676943	0.269707	8	1.53849	1.31176	1.72846	1.2275	2.33512	2.07468	1.96438	1.72233	1.73784	0.378642	8	2.44822e-05	p<0.05
9.5	0.309845	0.697432	0.420146	0.363463	0.884335	1.20912	0.968595	0.743391	0.69954	0.318704	8	1.43125	1.67943	1.48793	1.34393	1.92608	1.9797	2.19571	1.52317	1.6959	0.304869	8	1.69862e-05	p<0.05
9.8	0.299122	0.669859	0.375718	0.420146	0.720414	1.20912	0.960936	0.80927	0.683073	0.312236	8	1.71773	2.13137	1.55074	1.419	2.00421	2.34431	2.20796	1.35619	1.84144	0.380132	8	1.29858e-05	p<0.05
10.2	0.271544	0.603985	0.315972	0.389504	0.665263	1.08349	0.921103	0.881271	0.641517	0.302214	8	1.96285	1.93834	1.61662	1.24894	1.98583	2.24014	2.00574	1.46649	1.80812	0.330418	8	3.68425e-06	p<0.05
10.6	0.368059	0.636154	0.375718	0.349677	0.659136	1.33627	0.697432	0.890462	0.664113	0.332659	8	1.69935	1.86174	1.42359	1.55228	2.07622	2.17579	2.13443	1.34546	1.78361	0.327504	8	8.84799e-06	p<0.05
11	0.401764	0.591726	0.340481	0.3987	0.551898	0.988509	0.527384	0.706628	0.563386	0.209219	8	1.86634	1.28418	1.1555	1.80352	2.05783	1.82344	2.23248	1.11567	1.66737	0.425527	8	5.64849e-05	p<0.05
11.4	0.312908	0.564153	0.387973	0.420146	0.380314	1.02987	0.504407	0.600922	0.525087	0.226244	8	1.6105	1.43585	1.12486	1.69169	2.14668	1.52777	2.36269	1.39908	1.66239	0.406419	8	2.5849e-05	p<0.05
11.7	0.3987	0.513597	0.188815	0.458447	0.528916	1.02375	0.576407	0.702032	0.548833	0.242526	8	1.44197	1.49559	1.29031	1.78054	1.89238	1.68403	2.19724	1.57985	1.67024	0.286495	8	8.73584e-07	p<0.05
12.1	0.368059	0.729605	0.199543	0.714287	0.516661	0.898121	0.685177	0.709691	0.602643	0.226487	8	1.82038	1.55994	1.19379	1.79893	1.95519	1.8694	1.90463	1.46496	1.6959	0.264829	8	4.82122e-07	p<0.05
12.5	0.262353	0.807738	0.309845	0.829184	0.492147	0.950208	0.737264	0.766374	0.644389	0.256045	8	2.27997	1.69935	1.25508	1.6825	1.97204	1.60896	1.95519	1.49253	1.7432	0.318513	8	3.24592e-06	p<0.05
12.9	0.352741	0.597858	0.22252	0.55343	0.547303	0.875144	0.689773	0.576407	0.551897	0.197985	8	2.07162	1.47262	1.13864	1.65492	1.89544	1.7928	2.12677	1.83723	1.74875	0.324195	8	1.58792e-06	p<0.05
13.3	0.372654	0.6959	0.107623	0.521257	0.651477	1.11107	0.882803	0.600922	0.617963	0.304902	8	1.49559	1.40981	1.25814	1.54462	1.87706	1.57985	2.00881	2.2386	1.67656	0.332141	8	1.15378e-05	p<0.05
13.6	0.40636	0.712755	0.106092	0.61624	0.631558	1.39755	0.985445	0.539639	0.674454	0.385331	8	1.60436	1.52777	1.41593	1.61662	1.81578	2.02719	1.49253	2.16967	1.70873	0.269904	8	3.6759e-05	p<0.05
14	0.538107	0.824588	0.0969006	0.47836	0.525852	1.0406	1.08962	0.436996	0.628877	0.334114	8	1.82957	1.76829	1.44044	1.5247	1.95365	1.76676	1.53083	2.04557	1.73248	0.216448	8	4.62602e-06	p<0.05
14.4	0.496747	0.677518	0.0739181	0.328226	0.544234	0.971659	1.12945	0.446192	0.583493	0.340237	8	1.86634	1.4144	1.54768	1.74377	1.96898	1.85867	1.6442	1.81272	1.73209	0.184954	8	4.6709e-06	p<0.05
14.8	0.309845	0.721946	0.152051	0.248566	0.50747	1.30103	0.852166	0.470701	0.570472	0.377314	8	1.46343	1.53696	1.45576	1.4527	1.88165	1.58445	1.71161	1.58904	1.58445	0.148969	8	5.44544e-05	p<0.05
15.2	0.446192	0.726541	0.282267	0.210266	0.374186	1.11567	0.737264	0.427805	0.540023	0.299794	8	1.31482	1.62122	1.30716	1.25967	1.87399	1.44963	1.71773	1.4144	1.49483	0.220667	8	6.8084e-06	p<0.05
15.5	0.438528	0.689773	0.242434	0.190347	0.383377	1.17541	0.84297	0.410955	0.546724	0.333786	8	1.20298	1.65492	1.31023	1.4527	1.61662	1.60436	1.69628	1.32248	1.48257	0.186153	8	2.53588e-05	p<0.05
15.9	0.389504	0.827652	0.0524726	0.0708545	0.463042	1.17694	0.810802	0.337417	0.516086	0.393626	8	1.21371	1.94906	1.16163	1.64726	1.78667	1.44657	1.51704	1.45423	1.52202	0.268152	8	5.75263e-05	p<0.05
16.3	0.414019	0.602453	0.0601317	0.127537	0.498279	1.16928	0.715819	0.380314	0.49598	0.350269	8	1.43738	1.35619	1.28418	1.70088	1.77748	1.19379	1.67637	1.35772	1.473	0.216402	8	2.48694e-05	p<0.05
16.7	0.303717	0.631558	0.15052	0.0969006	0.628494	0.896589	0.878207	0.554962	0.517619	0.306555	8	1.42359	1.46496	1.2612	1.55074	1.69169	1.2612	1.82497	1.27346	1.46898	0.210326	8	8.60398e-06	p<0.05
17	0.216393	0.751056	0.156647	0.187283	0.444655	0.61624	0.98085	0.631558	0.498085	0.298619	8	1.39908	1.46496	1.40674	1.46802	1.65645	1.40367	1.74837	1.29184	1.47989	0.149605	8	6.91434e-06	p<0.05
17.4	0.16737	0.746455	0.145924	0.435464	0.389504	0.535043	0.979318	0.622367	0.502681	0.282594	8	1.53849	1.41134	1.48793	1.70394	1.34546	1.93987	1.64879	1.28418	1.545	0.214131	8	1.42683e-06	p<0.05
17.8	0.129069	0.729605	0.319035	0.54117	0.340481	0.588662	0.858294	0.646876	0.519149	0.240557	8	1.40521	1.48947	2.00421	1.8602	1.2949	2.18192	1.53543	1.31023	1.6352	0.336197	8	4.32319e-06	p<0.05
18.2	0.155115	0.740328	0.219457	0.392568	0.292989	0.775565	0.813866	0.63309	0.502872	0.267768	8	1.30256	1.57373	1.89084	1.39601	1.36231	2.46687	1.50785	1.40367	1.61298	0.390786	8	2.08597e-05	p<0.05
18.6	0.133664	0.812334	0.306781	0.384909	0.256226	0.78016	0.873612	0.57028	0.514746	0.283608	8	1.21984	1.48334	1.35772	1.47262	1.52164	2.14056	1.43585	1.49406	1.5157	0.27064	8	4.46755e-06	p<0.05
18.9	0.210266	0.72501	0.421678	0.173497	0.280735	0.964	0.924167	0.492147	0.523937	0.313068	8	1.24588	1.3807	0.994636	1.44351	1.64113	2.09	1.35005	1.42512	1.44638	0.318591	8	4.2896e-05	p<0.05
19.3	0.265417	0.608581	0.211798	0.165838	0.340481	0.951745	0.953277	0.495211	0.499043	0.315445	8	1.47874	1.47262	1.12639	1.1126	1.77442	2.12677	1.38682	1.08502	1.44542	0.362569	8	7.40682e-05	p<0.05
19.7	0.342013	0.561089	0.152051	0.193416	0.450788	0.666795	0.770969	0.386441	0.440445	0.217762	8	1.76676	1.51245	1.06358	1.3041	1.6442	1.84642	1.48181	1.40367	1.50287	0.253686	8	4.1103e-07	p<0.05
20.1	0.348145	0.577939	0.178092	0.155115	0.430869	0.904253	0.737264	0.358868	0.461318	0.26299	8	1.50632	1.55687	0.813866	1.72999	1.21218	1.4864	1.8648	1.52777	1.46227	0.323472	8	1.07774e-05	p<0.05
20.5	0.363463	0.475297	0.332822	0.243971	0.458447	1.00843	0.798542	0.516661	0.524704	0.25565	8	1.38989	1.80352	0.990041	1.3424	1.13098	1.35925	1.84948	1.43585	1.41268	0.295291	8	1.73221e-05	p<0.05
20.8	0.291458	0.645345	0.234775	0.436996	0.554962	0.942549	0.793947	0.452319	0.544044	0.242298	8	1.37457	2.08081	1.29337	1.29644	1.13864	1.32861	1.70547	1.40981	1.45347	0.300046	8	1.32084e-05	p<0.05
21.2	0.294526	0.567216	0.110687	0.433932	0.525852	0.936422	0.792415	0.463042	0.515512	0.261519	8	1.21678	1.72846	1.54615	1.43585	1.27039	1.13711	1.89238	1.26886	1.437	0.266911	8	6.51605e-06	p<0.05
21.6	0.248566	0.728073	0.0785136	0.387973	0.648413	0.838375	0.766374	0.622367	0.539832	0.271292	8	1.03753	1.9031	1.34852	1.47721	1.49253	1.68862	1.9843	1.39295	1.5406	0.308981	8	8.20463e-06	p<0.05
22	0.273076	0.665263	0.196479	0.225584	0.531979	0.930294	0.821525	0.44006	0.510533	0.277359	8	1.3332	2.01953	1.59517	1.88625	1.67177	1.64113	1.8265	1.37763	1.6689	0.238677	8	4.27617e-07	p<0.05
22.3	0.317504	0.674454	0.0969006	0.254694	0.441592	0.775565	0.810802	0.42321	0.47434	0.257176	8	1.73765	2.32133	1.11107	2.06702	1.84489	1.65798	1.7162	1.21524	1.70892	0.401139	8	9.45988e-06	p<0.05
22.7	0.257757	0.579471	0.0953688	0.122942	0.467638	0.657604	0.887398	0.3987	0.43336	0.272972	8	1.54155	1.82803	0.896589	1.91995	1.59977	1.47721	1.65492	1.3807	1.53734	0.313358	8	3.15766e-06	p<0.05
23.1	0.250098	0.577939	0.0157037	0.181156	0.427805	0.656072	1.18307	0.46151	0.469169	0.357524	8	1.3424	1.31635	1.0406	1.48793	1.55841	1.57066	1.39448	1.43585	1.39334	0.170041	8	6.02303e-05	p<0.05
23.5	0.152051	0.590194	0.0111083	0.0953688	0.436996	0.648413	1.1892	0.544234	0.458445	0.381927	8	1.17388	1.31329	1.32248	1.36231	1.43891	1.52777	1.53696	1.53849	1.40176	0.131924	8	0.000118838	p<0.05
23.9	0.280735	0.585598	0.14286	0.132133	0.429337	0.665263	0.876675	0.525852	0.454807	0.260987	8	1.15856	1.18767	1.4573	1.50632	1.56607	1.49559	1.71467	1.59824	1.46055	0.194078	8	8.6557e-07	p<0.05
24.2	0.256226	0.55343	0.0846409	0.260821	0.346613	0.936422	0.78016	0.530448	0.468595	0.287235	8	1.43585	1.5676	1.2612	1.64266	1.65798	1.45576	1.81884	1.61509	1.55687	0.169877	8	1.29037e-06	p<0.05
24.6	0.352741	0.493679	0.0938369	0.493679	0.25163	1.02681	0.734201	0.590194	0.504596	0.290016	8	1.46036	1.58598	1.28571	1.67484	1.69169	1.73152	1.69475	1.38989	1.56434	0.16593	8	1.97521e-06	p<0.05
25	0.375718	0.600922	0.0693227	0.325163	0.210266	1.12486	0.723478	0.528916	0.49483	0.330938	8	1.37151	1.52624	1.24282	1.3424	1.55381	1.42972	1.32861	1.77135	1.44581	0.16713	8	2.27486e-05	p<0.05
25.4	0.31444	0.528916	0.182688	0.306781	0.254694	1.02528	0.677518	0.522788	0.476638	0.276985	8	1.28571	1.42206	1.13558	1.26733	1.59058	1.41134	1.12486	1.49713	1.34182	0.167151	8	8.53569e-06	p<0.05
25.8	0.270012	0.657604	0.237839	0.201075	0.288394	0.875144	0.596321	0.412487	0.442359	0.242512	8	1.28725	1.47568	0.919572	1.21371	1.43125	1.64879	1.12179	1.42359	1.3152	0.229055	8	3.41406e-06	p<0.05
26.1	0.247035	0.430869	0.190347	0.0233629	0.266948	0.775565	0.613176	0.475297	0.377825	0.243807	8	1.24129	2.22941	1.10647	1.43738	1.16316	1.74224	1.26427	1.40674	1.44887	0.372877	8	1.85538e-05	p<0.05
26.5	0.193416	0.551898	0.340481	-0.0195333	0.280735	0.740328	0.634622	0.410955	0.391613	0.247834	8	1.05439	1.97511	1.30256	1.4864	1.28265	1.93527	1.40827	1.50172	1.4933	0.31808	8	2.94904e-06	p<0.05
26.9	0.253162	0.499811	0.366527	-0.0409789	0.237839	0.659136	0.554962	0.443123	0.371698	0.220395	8	0.833779	1.84948	0.968595	1.4527	1.63194	2.11911	1.54309	1.76063	1.51991	0.433908	8	4.62311e-05	p<0.05
27.3	0.286862	0.591726	0.280735	-0.0180015	0.16737	0.593257	0.602453	0.421678	0.36576	0.227424	8	0.965531	1.59058	0.864421	1.58598	1.54309	2.09153	1.79893	1.59517	1.5044	0.406245	8	2.53446e-05	p<0.05
27.7	0.188815	0.654541	0.300654	-0.0164696	0.317504	0.630026	0.551898	0.547303	0.396784	0.238181	8	1.06664	1.52624	0.887398	1.51092	1.50172	1.87246	1.66871	1.45423	1.43604	0.316329	8	5.00751e-06	p<0.05
28	0.07545	0.631558	0.337417	0.0202992	0.463042	0.643813	0.547303	0.574876	0.41172	0.245427	8	1.21831	1.58904	1.15397	1.70547	1.67484	1.50172	1.37457	1.47568	1.4617	0.201565	8	2.88728e-07	p<0.05
28.4	0.158179	0.812334	0.201075	0.0923051	0.518193	0.545766	0.643813	0.484488	0.432019	0.255327	8	1.67637	1.33167	1.51551	1.51092	1.32095	1.09881	1.40367	1.58292	1.4301	0.181219	8	7.38051e-07	p<0.05
28.8	0.263885	0.645345	0.112219	0.0861727	0.501343	0.542702	0.718882	0.363463	0.404251	0.237107	8	1.81731	1.56147	1.73918	1.54155	1.44504	1.25661	1.4864	1.5967	1.55553	0.173421	8	6.1501e-08	p<0.05
29.2	0.213329	0.588662	0.0785136	0.0141719	0.476829	0.772501	0.74186	0.371123	0.407124	0.288991	8	1.80505	1.59364	1.77748	1.11873	1.45883	1.45883	1.56454	1.41593	1.52413	0.218486	8	8.43983e-07	p<0.05
29.5	0.329758	0.455383	0.0448135	0.0524726	0.600922	0.712755	0.603985	0.3987	0.399849	0.249207	8	1.57832	2.30601	1.41134	0.862889	1.82803	1.57219	1.66258	1.83723	1.63232	0.411001	8	1.26096e-05	p<0.05
29.9	0.164306	0.469169	0.0815773	0.127537	0.343545	0.582535	0.441592	0.386441	0.324588	0.180827	8	1.4573	1.55841	1.55994	1.07736	2.21869	1.73918	1.95212	1.70547	1.65856	0.339469	8	1.13612e-06	p<0.05
30.3	0.242434	0.496747	0.0417498	0.161242	0.15971	0.504407	0.429337	0.418614	0.30678	0.177226	8	1.55534	1.46649	1.26733	1.00383	2.09613	1.80046	1.94293	1.59824	1.59134	0.356418	8	3.02852e-06	p<0.05
30.7	0.312908	0.386441	0.210266	-0.0379152	0.165838	0.358868	0.492147	0.464574	0.294141	0.175285	8	1.41134	1.88319	1.08196	1.08809	1.93221	1.85561	1.57066	1.58139	1.55055	0.338812	8	2.12209e-06	p<0.05
31.1	0.266948	0.364995	0.124473	-0.112985	0.257757	0.309845	0.3987	0.407891	0.252203	0.173893	8	1.40214	1.63807	1.09728	1.46955	1.67024	1.89544	1.4864	1.39601	1.50689	0.235349	8	2.02013e-08	p<0.05
31.4	0.187283	0.378782	0.0126401	-0.123708	0.148988	0.481424	0.427805	0.412487	0.240713	0.219611	8	1.44504	1.56913	1.02834	1.4527	1.6442	1.39601	1.50938	1.25201	1.4121	0.194159	8	2.34247e-08	p<0.05
31.8	0.315972	0.636154	0.0846409	-0.013406	0.286862	0.692836	0.607049	0.528916	0.392378	0.264781	8	1.57066	1.19226	0.881271	1.32555	1.60283	1.49866	1.51704	1.31482	1.36289	0.24134	8	2.37873e-06	p<0.05
32.2	0.262353	0.585598	0.0969006	0.00344913	0.286862	0.885866	0.550366	0.544234	0.401954	0.29149	8	1.47874	1.46649	1.06205	1.31023	1.31329	1.37304	1.51858	1.46496	1.37342	0.148211	8	5.94451e-06	p<0.05
32.6	0.162774	0.594789	-0.0654931	0.00344913	0.165838	0.614708	0.435464	0.424742	0.292034	0.261234	8	1.39448	1.14783	1.44657	1.48487	1.14783	1.73152	1.40827	1.27346	1.37936	0.192411	8	3.62546e-07	p<0.05
33	0.202607	0.590194	-0.126771	0.0233629	0.152051	0.554962	0.464574	0.354272	0.276906	0.257742	8	1.19073	0.979318	1.09728	1.80199	1.44044	1.75297	1.55994	1.10034	1.36538	0.317582	8	3.55547e-06	p<0.05
33.3	0.202607	0.538107	0.0172356	0.0111083	0.136728	0.449256	0.449256	0.309845	0.264268	0.203782	8	1.32095	1.19379	1.07583	1.88319	1.12179	1.48334	1.45423	1.52624	1.38242	0.264054	8	3.01592e-07	p<0.05
33.7	0.101496	0.492147	0.0264265	0.0509408	0.156647	0.581003	0.567216	0.291458	0.283417	0.233601	8	1.2275	1.55994	1.04519	1.68096	1.12639	1.90004	1.419	1.46036	1.42742	0.288606	8	6.85397e-07	p<0.05
34.1	0.0432816	0.530448	-0.0716204	0.0157037	0.193416	0.545766	0.574876	0.303717	0.266948	0.260913	8	1.08043	1.50785	0.823056	1.73918	1.45423	2.22788	1.59364	1.44044	1.48334	0.41979	8	1.72687e-05	p<0.05
34.5	0.106092	0.812334	0.0356175	0.0157037	0.214861	0.590194	0.54117	0.400232	0.339526	0.292277	8	1.37457	1.57066	0.778629	1.8648	1.6105	1.84489	1.77288	1.47568	1.53658	0.35248	8	4.12988e-06	p<0.05
34.8	0.168901	0.515129	0.101496	-0.00727364	0.271544	0.708159	0.607049	0.459979	0.353123	0.256901	8	1.53849	2.04711	0.924167	1.61509	2.08388	2.14975	1.94446	1.5293	1.72903	0.411875	8	4.25678e-06	p<0.05
35.2	0.127537	0.600922	0.23937	0.0984324	0.299122	0.596321	0.623899	0.410955	0.37457	0.215521	8	1.44504	1.8648	0.941017	1.84642	2.24014	2.15894	1.93987	1.59977	1.7545	0.420179	8	6.69431e-06	p<0.05
35.6	0.110687	0.610113	0.0478771	0.0708545	0.424742	0.522788	0.656072	0.37725	0.352548	0.246096	8	1.3761	1.80352	0.870548	1.43891	1.86634	2.1329	1.88012	1.46496	1.60417	0.396607	8	7.53506e-06	p<0.05
36	0.168901	0.550366	0.066259	0.0923051	0.352741	0.714287	0.718882	0.309845	0.371698	0.263626	8	1.2995	1.57679	0.933358	1.47415	1.84029	1.563	1.66565	1.32555	1.45979	0.275823	8	1.26153e-06	p<0.05
36.4	0.165838	0.530448	0.12141	0.13826	0.161242	0.558025	0.654541	0.348145	0.334739	0.218225	8	1.29184	1.51551	1.49406	1.5967	1.38223	1.76523	1.56607	1.07124	1.46036	0.211391	8	5.2674e-08	p<0.05
36.7	0.171965	0.528916	0.0647272	0.0831091	0.173497	0.452319	0.528916	0.280735	0.285523	0.193277	8	1.35772	1.41747	1.16009	1.43125	1.18001	1.25814	1.64266	0.905785	1.29414	0.22124	8	1.56537e-07	p<0.05
37.1	0.181156	0.639217	0.0509408	0.0463453	0.178092	0.355804	0.489083	0.173497	0.264267	0.212159	8	1.44351	1.16469	1.12639	1.65952	1.08656	1.30716	1.87706	0.878207	1.31789	0.327818	8	6.10479e-06	p<0.05
37.5	0.188815	0.401764	-0.00880547	0.0616635	0.179624	0.531979	0.403296	0.178092	0.242054	0.185879	8	1.34699	1.3332	0.990041	1.35772	1.28725	1.63041	1.83569	1.00843	1.34872	0.284114	8	8.20949e-07	p<0.05
37.9	0.170433	0.585598	-0.0685568	0.198011	0.224052	0.567216	0.361932	0.300654	0.292417	0.215519	8	1.27193	1.27805	0.947144	1.34546	1.7499	1.55534	1.78973	0.957872	1.36193	0.321084	8	4.17e-06	p<0.05
38.3	0.193416	0.444655	0.0432816	-0.0103423	0.152051	0.577939	0.430869	0.375718	0.275948	0.211077	8	1.48793	1.21984	1.19379	1.11107	1.93987	1.72846	1.79433	1.10954	1.4481	0.335279	8	2.65859e-06	p<0.05
38.6	0.0984324	0.475297	-0.0164696	-0.129835	0.15971	0.501343	0.531979	0.363463	0.24799	0.254303	8	1.35005	1.4481	1.18307	1.01915	1.69475	1.85714	1.74071	1.27346	1.4458	0.294735	8	5.94171e-07	p<0.05
39	0.0463453	0.207202	0.021831	-0.0762159	0.216393	0.55343	0.565685	0.33129	0.233245	0.238748	8	1.24129	1.17541	0.919572	1.10954	1.53543	1.52164	1.93834	1.55841	1.37495	0.323778	8	2.29557e-06	p<0.05
39.4	0.0248947	0.3604	-0.0379152	0.0631954	0.248566	0.558025	0.564153	0.366527	0.268481	0.234543	8	1.10187	1.51092	0.859825	1.2949	1.37763	1.38682	1.91842	1.46955	1.36499	0.309027	8	2.19197e-06	p<0.05
39.8	0.0831091	0.329758	-0.0578289	0.119878	0.188815	0.674454	0.677518	0.306781	0.290311	0.26801	8	1.28878	1.42666	1.0069	1.31176	1.33014	1.49866	1.75603	1.2612	1.36001	0.21489	8	6.23394e-07	p<0.05
40.2	0.162774	0.279203	-0.143621	0.225584	0.224052	0.443123	0.447724	0.305249	0.243011	0.186594	8	1.24435	1.40827	0.936422	1.01149	1.65798	1.66565	1.54309	0.983913	1.3064	0.304905	8	2.82058e-06	p<0.05
40.5	0.191879	0.312908	-0.125239	-0.00420999	0.101496	0.395637	0.311376	0.33129	0.189392	0.184009	8	1.2275	1.48028	0.925699	1.15856	1.61356	1.7928	1.83263	0.755651	1.34833	0.396476	8	2.20611e-05	p<0.05
40.9	0.126005	0.231711	-0.0225969	-0.0731522	0.245503	0.482956	0.369591	0.181156	0.192647	0.185727	8	1.34852	1.62428	1.02221	1.58139	1.8648	1.67637	1.71467	0.878207	1.46381	0.350451	8	2.4811e-06	p<0.05
41.3	0.0202992	0.348145	0.0800454	-0.0379152	0.175029	0.325163	0.430869	0.280735	0.202796	0.16957	8	1.49713	1.42972	0.968595	1.90157	1.90463	1.9843	1.65645	1.01455	1.54462	0.394801	8	6.95104e-06	p<0.05
41.7	0.00804461	0.277671	0.0172356	0.00804461	0.10456	0.270012	0.447724	0.282267	0.176945	0.165194	8	1.83416	1.1126	0.993104	1.59211	1.55074	1.60896	1.62428	0.985445	1.41268	0.329681	8	2.06775e-06	p<0.05
42	0.179624	0.357336	-0.0440425	-0.0471062	-0.00574182	0.280735	0.453851	0.216393	0.173881	0.190446	8	1.73612	0.947144	1.18613	1.50019	1.36231	1.25201	1.75143	1.23669	1.3715	0.277959	8	2.57863e-07	p<0.05
42.4	0.130601	0.400232	-0.0578289	-0.0517016	0.0463453	0.334354	0.505938	0.240902	0.193605	0.210897	8	1.44351	1.20452	0.95634	1.58751	1.26274	1.42359	1.87246	1.38836	1.39238	0.27108	8	1.82893e-07	p<0.05
42.8	0.188815	0.364995	-0.0746841	-0.0746841	0.124473	0.262353	0.519725	0.31444	0.203179	0.208081	8	1.40827	1.51704	1.09421	1.42666	1.35925	1.50785	1.95978	1.3041	1.44715	0.246706	8	4.18472e-08	p<0.05
43.2	0.176561	0.403296	0.0494089	-0.0991933	0.262353	0.0953688	0.372654	0.236307	0.187094	0.168482	8	1.48181	1.37763	0.910381	1.43585	1.26733	1.55228	2.03332	1.32248	1.42263	0.314415	8	1.11918e-06	p<0.05
43.6	0.15052	0.357336	0.0999642	-0.0823432	0.208734	0.0907682	0.412487	0.194948	0.179052	0.156114	8	1.24894	1.21831	1.06358	1.69935	1.28418	1.38529	2.14362	1.39295	1.42953	0.341905	8	3.21654e-06	p<0.05
43.9	0.130601	0.348145	0.00191731	-0.00267817	0.190347	0.0248947	0.591726	0.257757	0.192839	0.205012	8	1.26733	1.50632	0.970127	1.77135	1.32861	1.59364	1.98889	1.34393	1.47127	0.317015	8	5.75897e-07	p<0.05
44.3	0.124473	0.308313	-0.0256606	-0.0379152	0.289926	0.148988	0.496747	0.319035	0.202988	0.184317	8	1.59364	1.48487	1.22137	1.72692	1.74377	1.8648	1.62428	1.34086	1.57507	0.215911	8	2.34015e-09	p<0.05
44.7	0.0570681	0.510534	-0.0103423	-0.0976614	0.389504	0.0417498	0.380314	0.20567	0.184605	0.220814	8	1.71007	1.3424	1.55381	1.4527	1.69169	1.72692	1.60436	1.26427	1.54328	0.174773	8	3.34292e-09	p<0.05
45.1	0.0111083	0.348145	0.0677908	-0.0440425	0.231711	0.282267	0.374186	0.113751	0.173115	0.157858	8	1.58139	1.40827	1.29337	1.33167	1.84335	1.94446	1.79739	1.1463	1.54328	0.292786	8	1.95723e-07	p<0.05
45.5	-0.0210651	0.329758	0.031022	0.0141719	0.0984324	0.0800454	0.259289	0.175029	0.120835	0.123924	8	1.51551	1.54002	1.3378	1.07124	1.67024	1.88472	1.73918	1.01609	1.47185	0.310303	8	9.79377e-07	p<0.05
45.8	0.0187674	0.296058	-0.0180015	0.0785136	0.141324	0.214861	0.266948	0.132133	0.141325	0.113116	8	1.32095	1.35159	1.09268	0.982381	1.40214	1.43585	1.76829	0.839907	1.27422	0.293139	8	2.93809e-06	p<0.05
46.2	-0.0164696	0.475297	0.0111083	-0.013406	0.187283	0.319035	0.236307	0.224052	0.177901	0.175739	8	1.49713	1.50478	1.16775	1.06511	1.635	1.8694	1.8602	0.898121	1.43719	0.36148	8	4.3381e-06	p<0.05
46.6	-0.00880547	0.436996	-0.0501698	0.0769818	0.214861	0.28533	0.227116	0.220989	0.175412	0.160947	8	1.36078	1.76523	1.00536	1.10494	1.87706	1.7499	1.97204	1.2229	1.50728	0.376879	8	5.03306e-06	p<0.05
47	0.224052	0.544234	-0.013406	0.0631954	0.135196	0.240902	0.291458	0.247035	0.216583	0.168006	8	1.4527	1.27805	0.959404	1.39908	1.62122	1.4144	1.9414	1.41593	1.43527	0.278858	8	2.83958e-07	p<0.05
47.3	0.286862	0.369591	-0.0118742	0.130601	0.274607	0.265417	0.363463	0.213329	0.2365	0.126547	8	1.44657	1.44351	0.983913	1.45576	1.75297	1.54462	1.76063	1.39142	1.47242	0.243183	8	9.74858e-08	p<0.05
47.7	0.0815773	0.550366	-0.0425107	0.148988	0.289926	0.361932	0.299122	0.230179	0.239947	0.181451	8	1.31789	1.24129	1.01762	1.45117	1.53236	1.66565	1.80658	1.35159	1.42302	0.248501	8	7.75008e-08	p<0.05
48.1	0.0340856	0.391036	-0.0762159	-0.0624295	0.216393	0.213329	0.280735	0.158179	0.144389	0.166115	8	1.14783	1.36691	0.937953	1.12332	1.635	1.4481	1.72846	1.13711	1.31559	0.275746	8	3.82923e-07	p<0.05
48.5	0.214861	0.384909	-0.0731522	0.0831091	0.355804	0.135196	0.366527	0.135196	0.200306	0.161728	8	1.23975	1.72539	0.895057	1.11413	1.66258	1.2275	1.65492	1.2658	1.34814	0.299626	8	1.4082e-06	p<0.05
48.9	0.31444	0.420146	-0.0547653	0.0157037	0.139792	0.283798	0.369591	0.107623	0.199541	0.172532	8	1.68709	1.22597	0.861357	1.21524	1.70088	1.05439	1.67637	1.6105	1.37897	0.330391	8	2.97749e-06	p<0.05
49.2	0.173497	0.296058	-0.0654931	0.0294902	0.0647272	0.550366	0.432401	0.113751	0.19935	0.211116	8	1.57066	1.29337	1.03906	1.35005	1.70701	1.39142	1.77442	1.51704	1.45538	0.23813	8	2.71824e-08	p<0.05
49.6	0.132133	0.305249	-0.0762159	-0.0409789	-0.00574182	0.516661	0.436996	0.156647	0.178094	0.222602	8	1.46189	1.27652	0.91804	1.46649	1.78208	1.32401	1.49559	1.25048	1.37189	0.248628	8	9.00953e-08	p<0.05
50	0.182688	0.596321	0.0555362	-0.0624295	-0.0317879	0.176561	0.342013	0.165838	0.178092	0.213434	8	1.55228	1.53083	1.01609	1.24741	1.67943	1.56454	1.3332	1.24894	1.39659	0.221462	8	2.27364e-08	p<0.05
50.4	0.188815	0.40636	-0.148217	-0.189581	-0.0792795	0.145924	0.292989	0.207202	0.103027	0.217166	8	1.57985	1.58445	1.23975	0.919572	1.53236	1.57985	1.35619	1.21218	1.37553	0.240574	8	2.78904e-08	p<0.05
50.8	0.182688	0.245503	-0.162008	-0.188049	-0.0532335	0.387973	0.349677	0.312908	0.134432	0.234284	8	1.58904	1.39755	1.01149	0.856762	1.55228	1.68862	1.31789	1.11567	1.31616	0.297523	8	6.43082e-07	p<0.05
51.1	0.257757	0.332822	-0.120644	-0.255455	-0.0256606	0.233243	0.361932	0.334354	0.139794	0.238606	8	1.52317	1.42819	1.21218	0.849098	1.563	1.46343	1.24435	1.19073	1.30927	0.235278	8	1.09858e-07	p<0.05
51.5	0.300654	0.20567	-0.16354	-0.253923	0.0340856	0.237839	0.332822	0.300654	0.124283	0.226538	8	1.20145	1.18001	1.34393	1.04672	1.67024	1.19533	1.16469	1.13405	1.24205	0.191688	8	5.4981e-08	p<0.05
51.9	0.256226	0.201075	-0.215627	-0.194177	0.0601317	0.262353	0.409423	0.211798	0.1239	0.224373	8	1.10187	1.27959	1.2229	1.05745	1.55841	1.34546	1.08349	1.07736	1.21582	0.174452	8	5.88185e-08	p<0.05
52.3	0.199543	0.291458	-0.143621	0.0141719	0.0846409	0.470701	0.481424	0.198011	0.199541	0.216056	8	1.26733	1.17541	1.19686	1.10801	1.37457	1.19992	0.996168	1.34546	1.20797	0.123221	8	1.67398e-07	p<0.05
52.7	0.139792	0.348145	-0.122176	0.0478771	-0.0317879	0.219457	0.525852	0.20567	0.166604	0.208362	8	1.40521	1.31482	1.18001	1.09881	1.14171	1.34393	1.15703	1.25048	1.2365	0.109403	8	8.50173e-08	p<0.05
53	0.161242	0.308313	-0.149749	-0.0777477	0.101496	0.0769818	0.579471	0.256226	0.157029	0.229884	8	1.39908	1.55228	0.921103	0.991572	1.01609	1.36844	1.26427	1.44044	1.24416	0.237094	8	2.26269e-07	p<0.05
53.4	0.158179	0.325163	0.0126401	0.0371493	0.0233629	0.225584	0.613176	0.312908	0.21352	0.204553	8	1.44657	1.83876	0.913444	0.973191	0.93489	1.10801	1.32248	1.33014	1.23344	0.317154	8	6.08194e-06	p<0.05
53.8	0.115282	0.219457	-0.0440425	-0.083875	-0.0425107	0.132133	0.584066	0.274607	0.14439	0.22021	8	1.53083	1.44044	0.816929	1.13558	1.02068	1.23822	1.52317	1.25508	1.24512	0.251555	8	2.58272e-07	p<0.05
54.2	0.106092	0.499811	-0.11758	-0.114517	0.00804461	0.135196	0.453851	0.194948	0.145731	0.233126	8	1.48947	1.25967	0.954809	1.36385	1.1846	1.84335	1.45117	1.2658	1.35159	0.25968	8	1.36988e-07	p<0.05
54.5	0.135196	0.282267	-0.0731522	-0.093066	-0.0333197	0.148988	0.433932	0.196479	0.124666	0.18433	8	1.2995	1.50325	1.1172	1.20605	1.60283	1.26886	1.54615	1.22137	1.34565	0.179813	8	2.23415e-09	p<0.05
54.9	0.165838	0.335886	-0.191113	-0.114517	-0.0241288	0.0846409	0.453851	0.14286	0.106665	0.218134	8	1.30563	1.50019	1.25967	1.17541	1.58139	1.2995	1.70088	1.3332	1.39448	0.180009	8	5.69232e-09	p<0.05
55.3	0.126005	0.306781	-0.270778	-0.116048	-0.0440425	0.07545	0.337417	0.132133	0.0683647	0.206443	8	1.10187	1.53849	1.32708	1.27805	1.40981	1.21678	1.77442	0.991572	1.32976	0.247687	8	3.62345e-08	p<0.05
55.7	0.0647272	0.201075	-0.19724	-0.229414	0.13826	0.0969006	0.28533	0.188815	0.0685568	0.186748	8	1.2229	1.24129	1.40367	1.46649	1.33474	1.06205	1.67637	0.993104	1.30008	0.220883	8	1.2067e-08	p<0.05
56.1	0.0478771	0.156647	-0.137494	-0.232477	0.190347	0.276139	0.292989	0.352741	0.118346	0.210607	8	1.24741	1.2995	1.29337	1.38376	1.71314	1.17694	1.43891	1.16622	1.33991	0.177323	8	7.29481e-09	p<0.05
56.4	0.0402129	0.518193	-0.223286	-0.114517	0.129069	0.309845	0.305249	0.237839	0.150326	0.243409	8	1.27346	1.44657	1.25201	1.20605	1.5247	1.25048	1.38376	1.08656	1.30295	0.140796	8	1.37816e-07	p<0.05
56.8	-0.0164696	0.355804	-0.258518	0.188815	0.0570681	0.135196	0.368059	0.187283	0.127155	0.204269	8	1.51551	1.3761	1.13405	1.19073	1.47568	1.00536	1.51092	0.914976	1.26542	0.23681	8	7.93009e-08	p<0.05
57.2	-0.108384	0.42321	-0.230945	-0.00420999	-0.0103423	0.211798	0.473765	0.208734	0.120453	0.251033	8	1.76676	1.43891	1.0743	0.914976	1.50478	1.24282	1.52624	0.994636	1.30793	0.298921	8	7.21307e-07	p<0.05
57.6	-0.0731522	0.257757	-0.125239	-0.0884705	0.101496	0.305249	0.479892	0.162774	0.127538	0.21562	8	2.07775	1.84795	1.14477	0.908849	1.47108	1.33167	1.6105	0.988509	1.42263	0.411552	8	9.55488e-06	p<0.05
58	-0.0379152	0.345082	-0.111453	-0.157408	0.0693227	0.141324	0.450788	0.305249	0.125624	0.224446	8	1.73458	1.54309	0.853698	1.33014	1.3761	1.2995	1.61815	1.10187	1.35714	0.284904	8	2.41341e-07	p<0.05
58.3	-0.00420999	0.29759	-0.0900023	-0.166604	-0.0195333	0.185751	0.567216	0.400232	0.146305	0.259119	8	1.57985	1.33933	0.864421	1.07277	1.41593	1.54768	1.78667	1.28418	1.36136	0.2935	8	5.13588e-07	p<0.05
58.7	0.0325538	0.0892364	-0.0731522	-0.0685568	-0.0225969	0.323631	0.626963	0.358868	0.158368	0.252288	8	1.491	1.35465	0.914976	0.80927	1.46036	1.80812	1.90923	1.24894	1.37457	0.385765	8	7.37756e-06	p<0.05
59.1	0.0540044	0.15052	-0.0746841	-0.0517016	-0.0762159	0.220989	0.466106	0.257757	0.118347	0.192767	8	1.43585	1.31176	0.830716	0.88893	1.86174	1.87706	1.67331	1.15856	1.37974	0.407929	8	1.32098e-05	p<0.05
59.5	0.194948	0.191879	-0.122176	-0.145153	-0.0685568	0.237839	0.415551	0.300654	0.125623	0.210072	8	1.32095	1.25048	0.708159	0.93489	2.1283	1.52624	1.46649	1.10647	1.30525	0.429067	8	3.46925e-05	p<0.05
59.8	0.0938369	0.243971	-0.0900023	-0.220223	0.0800454	0.247035	0.438528	0.282267	0.134432	0.21373	8	1.21065	1.76829	0.948676	1.28878	1.80505	1.81425	1.42359	1.1892	1.43106	0.32961	8	7.4772e-07	p<0.05
60.2	0.066259	0.276139	-0.0945978	-0.258518	0.107623	0.194948	0.328226	0.118346	0.0923032	0.192573	8	1.3807	1.78054	1.0743	1.3087	1.39142	1.37151	1.2275	1.23516	1.34623	0.205038	8	5.17483e-09	p<0.05
60.6	0.133664	0.415551	-0.0593608	-0.186517	0.031022	0.343545	0.240902	0.135196	0.13175	0.201882	8	1.6013	1.66718	1.34699	1.08349	1.27805	1.26886	1.46496	1.08349	1.34929	0.217382	8	1.51588e-08	p<0.05
61	0.201075	0.187283	-0.186517	-0.0900023	0.0723863		0.224052	0.153583	0.0802657	0.159334	7	1.35772	1.92455	1.20298	0.957872	1.41593	1.25048	1.48947	1.24129	1.35504	0.280526	8	2.21045e-07	p<0.05
61.4	0.110687	0.23937	-0.174263	-0.224818	0.0126401			0.0708545	0.00574519	0.176319	6	1.59517	1.51398	1.08196	1.23516	1.3378	1.25661	1.36997	1.19839	1.32363	0.168492	8	3.19995e-08	p<0.05
61.7	0.0785136	0.286862	-0.152812	-0.290692	-0.0517016			0.132133	0.000383799	0.208057	6	1.57679	1.23822	1.12639	1.42359	1.16316	1.98276	1.34393	1.03753	1.36155	0.305018	8	4.08162e-07	p<0.05
62.1	0.10456	0.225584	-0.0915341	-0.220223	-0.0532335			0.213329	0.0297472	0.179851	6	1.52777	0.979318	1.13864	1.81731	1.0069	1.92302	1.41593	0.951745	1.34508	0.385614	8	5.2819e-06	p<0.05
62.5	0.135196	0.257757	-0.0363834	-0.184986	-0.0180015			0.217925	0.061918	0.170336	6	1.42206	1.20759	1.19686	1.79739	1.05439	2.07009	1.55994	0.853698	1.39525	0.401606	8	7.59868e-06	p<0.05
62.9	0.0846409	0.214861	-0.0654931	-0.188049	-0.114517			0.245503	0.029491	0.179526	6	1.59517	1.23209	1.23516	1.69935	1.16928	1.48181	1.60589	0.867484	1.36078	0.281995	8	1.90019e-07	p<0.05
63.3	0.0616635	0.162774	-0.0379152	-0.155876	-0.0823432			0.208734	0.0261729	0.143019	6	1.63347	1.14017	1.16775	1.63654	1.11107	1.09575	1.7545	1.0789	1.32727	0.291404	8	3.74563e-07	p<0.05
63.6	0.021831	0.276139	-0.0854068	-0.174263	-0.0608976			0.208734	0.0310228	0.176576	6	1.42512	1.08809	1.1463	1.49559	1.38223	1.30716	1.50019	1.16928	1.31425	0.162478	8	4.77614e-08	p<0.05
64	0.00191731	0.364995	0.00191731	-0.256986	-0.0608976			0.204138	0.042514	0.216244	6	1.39908	1.23516	0.988509	1.1846	1.23822	1.43891	1.3332	1.34699	1.27058	0.143361	8	1.66276e-06	p<0.05
64.4	0.0708545	0.300654	0.0264265	-0.234009	-0.0455743			0.237839	0.059365	0.194098	6	1.19686	1.0789	0.939485	0.916508	1.13405	1.30716	1.48028	1.14017	1.14918	0.185247	8	5.56095e-07	p<0.05
64.8	-0.0639613	0.312908	-0.0639613	-0.13443	-0.0900023			0.245503	0.0343426	0.192593	6	1.18001	1.05286	0.859825	0.680582	1.38529	1.32248	1.48028	0.84297	1.10054	0.288786	8	2.80855e-06	p<0.05
65.2	0.0126401	0.378782	-0.0639613	-0.129835	-0.0716204			0.309845	0.0726416	0.216359	6	1.14171	1.00843	0.815397	0.550366	1.45576	1.47721	1.37763	0.878207	1.08809	0.335349	8	1.86223e-05	p<0.05
65.5	0.0371493	0.574876	0.00651278	-0.204899				0.366527	0.156033	0.310845	5	1.27193	1.12792	0.941017	0.645345	1.36997	1.67331	1.57219	0.922635	1.19054	0.349027	8	0.000294483	p<0.05
65.9	0.0585999	0.354272	0.0126401	-0.178858				0.387973	0.126925	0.240346	5	1.41747	0.990041	0.790883	0.78016	1.48028	1.8694	1.7162	0.911912	1.24454	0.430158	8	9.06055e-05	p<0.05
66.3	0.13826		-0.0562971	-0.171199				0.144392	0.013789	0.154578	4	1.37763	1.32708	0.666795	1.00383	1.54002	2.01494	1.74377	1.00536	1.33493	0.437224	8	2.28253e-05	p<0.05
66.7	0.0187674		-0.0624295	-0.177326				0.220989	0	0.167859	4	1.47108	1.33167	0.864421	1.00076	1.47108	1.67637	1.64879	1.13098	1.3244	0.299029	8	2.47573e-06	p<0.05
67												1.76829	1.57526	0.983913	1.05898	1.34546	1.39601	1.50172	1.10341	1.34163	0.275116	8
67.4												1.9123	1.48487	1.08502	1.03906	1.44657	1.07124	1.40674	1.28418	1.34125	0.291605	8
67.8												1.75143	1.17848	1.28571	1.08196	1.38836	1.47415	1.31789	1.31789	1.34948	0.201952	8
68.2												1.31176	1.16316	1.4527	1.20759	1.08043	1.21984	1.20912	1.25201	1.23707	0.109704	8
68.6												0.985445	1.14783	1.49866	1.06205	1.01302	0.792415	1.1463	1.15243	1.09977	0.201013	8
68.9												0.844502	1.34086	1.62122	0.723478	0.985445	1.24282	1.24588	1.17541	1.14745	0.287652	8
69.3												0.847566	1.05439	1.25814	0.770969	0.977786	1.38223	1.31789	1.35925	1.12103	0.240479	8
69.7												0.930294	1.43432	1.35619	1.03294	1.00076	1.02221	1.41747	1.27805	1.18403	0.207913	8
70.1												1.09728	1.51398	1.30103	1.07277	1.13252	1.14171	1.39908	1.18307	1.23018	0.158617	8
70.5												1.19226	1.14324	1.31176	1.11567	1.23822	1.02528	1.41287	1.35772	1.22463	0.131045	8
70.8												1.01915	1.02987	1.28418	1.24741	1.31329	1.33627	1.58445	1.40061	1.2769	0.186364	8
71.2												1.12179	1.5247	1.10341	1.10647	1.27346	1.37151	1.75909	1.32248	1.32287	0.230296	8
71.6												1.05286	1.23516	0.95634	1.10034	1.25661	1.32555	1.68403	1.27346	1.23554	0.220625	8
72												0.962468	1.28418	0.936422	1.19073	1.18613	1.5293	1.6105	1.0743	1.22175	0.245595	8
72.3												0.931826	1.26427	0.849098	1.00843	1.20145	1.46036	1.75297	0.970127	1.17982	0.306833	8
72.7												1.01302	1.81731	0.688241	0.876675	1.29797	1.40827	1.45576	0.967063	1.19054	0.369247	8
73.1												1.16316	1.41134	0.548835	0.812334	1.28878	1.09421	1.3332	1.02681	1.08483	0.288104	8
73.5												1.2949	1.2229	0.625431	0.812334	1.01149	1.10034	1.24741	1.43585	1.09383	0.268092	8
73.9												1.2658	0.964	0.800079	0.711223	0.907317	1.28265	1.19226	1.21678	1.04251	0.224653	8
74.2												1.18613	1.03447	1.02375	0.545766	1.21984	1.18767	1.19839	1.07277	1.0586	0.221508	8
74.6												1.20912	1.43125	1.1846	0.800079	1.09881	1.64726	1.36385	1.13864	1.2342	0.252209	8
75												1.24129	1.37304	1.25508	0.853698	0.824588	1.48947	1.48487	0.896589	1.17733	0.279905	8
75.4												1.09115	1.25967		0.904253	0.924167	1.47568	1.72999	0.951745	1.19095	0.31541	7
75.8												1.02068	1.32861		1.21984	1.05439	1.36538	1.48028	1.08809	1.22247	0.175683	7
76.1												1.20759			1.35005	1.03447	1.13711	1.38682	1.04519	1.19354	0.150032	6
76.5												1.21831			0.927231	1.35312	1.01609	1.37457	0.852166	1.12358	0.222904	6
76.9												1.2229			0.749524	1.00536	1.00383	1.54155	0.878207	1.0669	0.280617	6
77.3												1.17235			0.334354		1.10801	1.51245	0.954809	1.01639	0.432365	5
77.7												0.996168			0.424742		1.48181	1.44351	1.1172	1.09268	0.427363	5
78												0.985445			0.383377		1.57985	1.51858	1.25967	1.14538	0.486655	5
78.4												0.985445			0.253162		1.27805	1.52624	1.37151	1.08288	0.503956	5
78.8												0.994636			0.3987		1.57985	1.44657	0.954809	1.07491	0.466698	5
79.2												0.905785			0.400232		1.9123	1.59824	0.80927	1.12516	0.615795	5
79.5												0.841438			0.400232		1.79893	1.49253	0.927231	1.09207	0.55422	5
79.9												1.17388			0.54117		1.50632	1.20452	1.01762	1.0887	0.353523	5
80.3												1.72386			0.728073		1.31942	1.09268	0.884335	1.14967	0.390482	5
80.7												1.80812			0.783224		1.38836	1.2949	0.922635	1.23945	0.405322	5
81.1												1.60743			0.619304		1.63041	1.52317	0.994636	1.27499	0.449153	5
81.4												1.41287			0.63309		1.36078	1.48487	1.04672	1.18767	0.352291	5
81.8												1.35312			0.812334		1.11413	1.54002	1.11413	1.18675	0.275324	5
82.2												1.33014			0.777097		0.993104	1.64113	1.00076	1.14845	0.338967	5
82.6												1.19839			0.591726		1.08196	1.67024	0.919572	1.09238	0.395534	5
83												1.08502			0.660668		1.33474	1.67024	0.812334	1.1126	0.404806	5
83.3												1.15856			0.774033		0.982381	1.32401	0.815397	1.01088	0.231832	5
83.7												1.1892			0.648413		0.816929	1.16316	0.588662	0.881272	0.282073	5
84.1												1.26886			0.52432		0.991572	1.13711	0.608581	0.90609	0.326551	5
84.5												1.36844			0.626963			1.32861	0.573344	0.974339	0.432933	4
84.8												1.22137			0.499811			1.36844	0.747987	0.959403	0.404912	4
85.2												1.0743			0.466106			1.37916	0.746455	0.916507	0.396119	4
85.6												1.15856			0.487551			1.38682	0.712755	0.936423	0.409764	4
86												1.14324			0.63309			1.27652	0.714287	0.941784	0.316059	4
86.4												1.18767			0.858294			1.10034	0.715819	0.96553	0.217082	4
86.7												1.12639			0.876675			1.11413	0.694368	0.952891	0.207158	4
87.1												1.06205			1.07583			1.21218	0.807738	1.03945	0.168682	4
87.5												1.16316			0.735732			1.23209	0.986977	1.02949	0.221372	4
87.9												1.18767			0.862889			1.40367	0.994636	1.11222	0.235676	4
88.3												0.974722			0.858294			1.60743	0.9977	1.10954	0.337491	4
88.6												0.864421			0.74186			1.48947	1.08962	1.04634	0.328652	4

## Sheet: 2F
	Ventral											Dorsal
x0	8	1	9	7	6	3	2	4	average	std	count	8	1	9	7	6	3	2	4	average	std	count	ttest	p<0.05?
-116.7														0.00781957			0.0751064	0.0343656	0.0849845	0.0908993	0.0359471	4
-116.3												0.049799		-0.0187244			0.139309	0.0220185	0.0843672	0.0956842	0.0602493	5
-115.9												0.0590578		-0.0131691			0.0411554	0.0467107	-0.0107001	0.0649413	0.033996	5
-115.5												0.0664648		-0.029837			0.121407	0.0744912	0.000412521	0.086918	0.0607134	5
-115.2												0.0535025		-0.000821987			0.0874535	0.0960971	0.00102978	0.0877825	0.0460665	5
-114.8												0.0423899		0.0318945			0.0584405	0.0584405	0.0411554	0.0867945	0.0116611	5
-114.4												0.134988		0.0565888	-0.000821987		0.059675	-0.00637728	0.052266	0.0897168	0.0512331	6
-114												0.167705		0.088688	0.0146114		0.0707856	-0.0286005	0.0658476	0.103503	0.0669681	6
-113.6												0.0843672		0.0448589	0.00288154		-0.053912	0.0263392	0.138074	0.0807652	0.0663225	6
-113.3												0.101652		0.0349828	0.0343656		0.0405381	0.116469	0.0504142	0.103401	0.0363887	6
-112.9												0.152891		0.0454762	0.052268		-0.000204733	0.194251	0.0220185	0.118114	0.0775789	6
-112.5												0.109679		0.0578233	0.0337483		0.115849	0.0874535	0.0516487	0.116364	0.0333526	6
-112.1												0.0744912		0.00658506	0.0399209		0.0244875	0.0102906	0.078812	0.0794282	0.0314037	6
-111.7												0.0269565		0.0491797	0.0701684		0.0800465	-0.00946355	0.122024	0.0968155	0.0454142	6
-111.4												0.0399209		0.0448589	0.12511		0.139926	0.0238702	0.059675	0.112557	0.0483083	6
-111												0.0714049		0.0479452	0.0856018		0.0633786	0.0602923	0.088688	0.109882	0.0156072	6
-110.6												0.081281		0.0516487	0.0609095		0.0164632	0.0639958	0.151037	0.11122	0.0447462	6
-110.2												0.0905418		0.0460934	0.0701684		0.0220185	0.0356001	0.0689339	0.0958897	0.0254128	6
-109.8												0.0602923		0.057206	0.0460934		0.0535005	-0.00452551	-0.00267375	0.0753125	0.0302645	6
-109.5												0.0485645		0.0195494	0.0374519		0.0769602	0.0133769	-0.0150209	0.0704773	0.0316788	6
-109.1												0.00905612		0.0528832	0.0405381		0.0664648	0.0615268	0.0189322	0.0818972	0.0233097	6
-108.7	0.134369		0.127579			0.12017		0.175729	0.139462	0.0248638	4	0.0868363		0.0621441	0.0170804		0.0899225	0.0954799	0.0670821	0.110088	0.0289826	6	0.00439285	p<0.05
-108.3	0.124493		0.122641			0.15474		0.172643	0.143629	0.0243033	4	0.0960971		0.00164703	0.0201667		0.0497969	0.0998006	0.0701684	0.0966098	0.0400082	6	0.00265789	p<0.05
-108	0.0948606		0.181286			0.118318		0.119553	0.128504	0.0369763	4	0.0831327		0.0460934	0.0689339		0.0146094	0.0504162	0.0633786	0.0947577	0.0236033	6	0.0184804	p<0.05
-107.6	0.122024		0.183138			0.170791		0.0893053	0.141315	0.0435705	4	0.0979489		0.0590578	0.105973		0.028191	0.126962	0.0399209	0.116673	0.0396257	6	0.0529811	n.s
-107.2	0.178198		0.171408			0.0930088		0.108442	0.137764	0.0433191	4	0.120789		0.0374519	0.107208		0.0325118	0.107208	0.0294255	0.112763	0.0434141	6	0.0545108	n.s
-106.8	0.176346		0.161532			0.0726374		0.0948606	0.126344	0.0503787	4	0.125727		0.00288154	0.110911		0.146099	0.0880708	0.0356001	0.125212	0.0552382	6	0.259557	n.s
-106.4	0.122024		0.0954799			0.136838		0.111528	0.116468	0.0174232	4	0.109059		0.0380691	0.133136		0.028191	0.102887	0.00967134	0.110499	0.0509909	6	0.0819752	n.s
-106.1	0.117084		0.119555			0.121405		0.0732546	0.107824	0.0231144	4	0.133136		0.103504	0.128196		0.0676993	0.054737	0.0849845	0.135707	0.0319205	6	0.495496	n.s
-105.7	0.107208		0.1319			0.170791	0.126345	0.086219	0.124492	0.031486	5	0.12511		0.0689339	0.107208	-0.00144128	0.0948606	0.0917763	0.110911	0.125667	0.0421228	7	0.0954379	n.s
-105.3	0.0973316		0.129431	0.0349828		0.191162	0.127579	0.0849825	0.110912	0.0523123	6	0.130667		0.0744912	0.0960971	0.0183129	0.0991834	0.0936281	0.121407	0.130871	0.036861	7	0.44532	n.s
-104.9	0.11338		0.114617	0.0936281		0.213386	0.141161	0.126345	0.133753	0.0420532	6	0.170174		0.0590578	0.0652303	-0.00576206	0.0553522	0.0504162	0.0899225	0.109529	0.0530843	7	0.0326372	p<0.05
-104.5	0.15042		0.0553543	0.117086		0.183136	0.12511	0.064611	0.115953	0.049183	6	0.157211		0.0874535	0.0578233	-0.00452755	0.0393036	0.0565888	-0.000204733	0.0965658	0.0552836	7	0.0638521	n.s
-104.2	0.130665	0.1961	0.111528	0.0732567		0.205979	0.114615	0.0794272	0.130224	0.0524363	7	0.0430071		0.0646131	0.0195494	-0.0292198	0.0214012	0.0676993	0.0201667	0.0699328	0.0331014	7	0.00153351	p<0.05
-103.8	0.128196	0.121405	0.156594	0.0460934		0.182519	0.100418	0.142393	0.125374	0.043707	7	0.0226357		0.0411554	0.0535025	0.000410484	0.0565888	0.0479452	0.0973316	0.0859831	0.0301498	7	0.00232598	p<0.05
-103.4	0.141161	0.159678	0.19178	0.112146		0.216472	0.1319	0.0849825	0.148303	0.0452834	7	0.0541198		0.0423899	0.057206	0.0257199	0.1961	0.0405381	0.128814	0.118171	0.0618289	7	0.0332634	p<0.05
-103	0.160915	0.169554	0.221412	0.0615268		0.211534	0.135603	0.136838	0.156769	0.0536576	7	0.0831327		0.0473279	0.0627613	0.0362153	0.133752	0.0553543	0.0806637	0.111646	0.0323024	7	0.00489125	p<0.05
-102.7	0.152889	0.109059	0.328207	0.0676993		0.1319	0.162767	0.146097	0.156945	0.0820405	7	0.117703		0.0646131	0.0658476	0.0639938	0.0479452	0.0436244	0.0553543	0.105913	0.0245558	7	0.0254241	p<0.05
-102.3	0.139309	0.175729	0.234374	0.088688		0.157209	0.169556	0.15474	0.159944	0.0436257	7	0.0448589		0.0337483	0.0849845	0.0355981	0.00905408	0.0467107	0.0707856	0.0868646	0.0250241	7	0.000165594	p<0.05
-101.9	0.144864	0.104737	0.161532	0.0565888		0.115849	0.139926	0.0997986	0.117614	0.0350705	7	0.0189322		0.0454762	0.0991834	0.0491797	0.0479452	0.0676993	0.141778	0.107501	0.0409924	7	0.0297092	p<0.05
-101.5	0.126962	0.204125	0.141778	0.116469		0.139307	0.109677	0.101033	0.134193	0.0342569	7	0.0183149		0.0454762	0.0720222	0.0251027	0.0102886	0.0689339	0.107208	0.0899512	0.0349677	7	0.000643104	p<0.05
-101.1	0.1319	0.137455	0.141778	0.0967144		0.160296	0.0899225	0.126345	0.126344	0.024999	7	0.028193		0.0565888	0.0744912	-0.0107001	0.0146094	0.00596781	0.126345	0.0825439	0.0472559	7	0.00236869	p<0.05
-100.8	0.154123	0.139924	0.140543	0.08375		0.197335	0.112146	0.0856018	0.130489	0.0403174	7	0.0967144		0.0676993	0.103504	0.000410484	0.0609095	0.00596781	0.10227	0.102827	0.0438067	7	0.0107054	p<0.05
-100.4	0.154123	0.235609	0.12511	0.0714029		0.128196	0.11338	0.138072	0.137985	0.0501514	7	0.122641		0.0442416	0.120789	-0.00452755	0.0720201	0.0393036	0.0744891	0.107324	0.0455919	7	0.0170486	p<0.05
-100	0.138074	0.205977	0.135605	0.115851		0.0880708	0.117084	0.115232	0.130842	0.0369848	7	0.104739		0.0362173	0.0960971	0.00781957	0.128196	0.0689339	0.139926	0.123463	0.0482457	7	0.0615442	n.s
-99.6	0.157209	0.205977	0.11832	0.152889		0.183753	0.118936	0.088688	0.146539	0.0407776	7	0.0874535		0.0510314	0.0930108	0.000410484	0.151654	0.0800465	0.225733	0.138807	0.0723199	7	0.158335	n.s
-99.2	0.221412	0.178198	0.134988	0.162149		0.209682	0.105973	0.175112	0.169645	0.040202	7	0.112765	0.104121	0.0880708	0.11832	0.00967134	0.0800465	0.0800465	0.182521	0.137276	0.048327	8	0.00726125	p<0.05
-98.9	0.146099	0.159061	0.247956	0.120789	0.0374498	0.173877	0.115232	0.11338	0.139231	0.0602443	8	0.114	0.0911591	0.0448589	0.107208	-0.00823108	0.133752	0.078812	0.17326	0.132183	0.0554265	8	0.124063	n.s
-98.5	0.0930088	0.218941	0.171408	0.0683166	0.0541177	0.206596	0.105356	0.163382	0.135141	0.0631705	8	0.0800465	0.102887	0.0831327	0.114	-0.029837	0.130665	0.0318966	0.128196	0.120454	0.0547167	8	0.0841575	n.s
-98.1	0.155358	0.172643	0.22635	0.0905398	0.0578212	0.220793	0.111528	0.185605	0.15258	0.0610729	8	0.0930108	0.209065	0.0497969	0.0775775	-0.000824024	0.0893053	0.00535056	0.212151	0.132259	0.0812951	8	0.115427	n.s
-97.7	0.151654	0.174495	0.254128	0.130048	0.125108	0.273883	0.105973	0.107208	0.165312	0.0651415	8	0.0923936	0.222029	0.0460934	0.0948626	0.0565867	0.0510314	0.0294275	0.186842	0.137739	0.0703381	8	0.0650062	n.s
-97.3	0.113997	0.225731	0.15474	0.153506	0.134369	0.216472	0.0565867	0.0417706	0.137147	0.066383	8	0.0849845	0.169556	0.0349828	0.10659	0.0374498	0.136221	0.0405381	0.207213	0.142522	0.0649732	8	0.305188	n.s
-97	0.129431	0.163382	0.141161	0.181904	0.138072	0.197335	0.0707856	0.0726374	0.136838	0.0462216	8	0.108442	0.112148	0.0510314	0.119555	-0.0199609	0.111528	0.104121	0.130665	0.130022	0.0501852	8	0.0710486	n.s
-96.6	0.180669	0.218941	0.130048	0.165236	0.117701	0.330059	0.105356	0.123874	0.171485	0.0744223	8	0.112765	0.175731	0.0998006	0.173879	0.0343635	0.1319	0.0744912	0.116469	0.155255	0.0475424	8	0.0953635	n.s
-96.2	0.21462	0.278821	0.164001	0.177583	0.179433	0.264622	0.115849	0.192397	0.198416	0.053376	8	0.0707877	0.0868363	0.10659	0.141778	0.0899225	0.139309	0.0559715	0.0960971	0.138742	0.0302272	8	0.000738564	p<0.05
-95.8	0.21956	0.22141	0.241783	0.269562	0.086217	0.236226	0.0633786	0.201656	0.192474	0.075498	8	0.0646131	0.115851	0.0757257	0.15042	0.057204	0.117703	0.0917763	0.176964	0.146612	0.0421817	8	0.0167237	p<0.05
-95.5	0.16647	0.136838	0.227584	0.287464	0.0985641	0.222644	0.0769582	0.136838	0.16917	0.0715657	8	0.0436244	0.111531	0.0121404	0.128196	0.0158439	0.0590578	0.0893053	0.153506	0.116981	0.0523719	8	0.0113935	p<0.05
-95.1	0.135603	0.175112	0.23314	0.175114	0.0930088	0.131283	0.0744891	0.189928	0.15096	0.0524648	8	0.0800465	0.107208	0.059675	0.0720222	0.0207819	0.101652	0.0621441	0.193014	0.127398	0.0505456	8	0.0264615	p<0.05
-94.7	0.191162	0.105971	0.192397	0.161532	0.110911	0.226967	0.0454762	0.14301	0.147178	0.0584633	8	0.101652	0.173262	0.0781947	0.0806637	0.0479452	0.0491797	0.0831327	0.130048	0.13334	0.0419325	8	0.0533857	n.s
-94.3	0.178817	0.132517	0.205979	0.134371	0.100416	0.256597	0.0621441	0.130665	0.150188	0.0614443	8	0.115851	0.0893053	0.0485624	0.145482	0.03066	0.109059	0.104121	0.052266	0.127244	0.0394527	8	0.0306406	p<0.05
-93.9	0.205361	0.153506	0.24487	0.11338	0.122639	0.25598	0.0658476	0.126962	0.161068	0.0676453	8	0.134371	0.209065	0.0368346	0.100418	0.0325118	0.119555	0.123258	0.0436244	0.140285	0.0606191	8	0.0780573	n.s
-93.6	0.115849	0.310303	0.251659	0.086219	0.163999	0.218941	0.0639958	0.141159	0.169016	0.0851862	8	0.12511	0.210299	0.0843672	0.0960971	0.0220164	0.15474	0.168322	0.122024	0.163202	0.057448	8	0.227546	n.s
-93.2	0.128814	0.225113	0.250425	0.0818982	0.0880708	0.22635	0.104739	0.115232	0.15258	0.0693671	8	0.117086	0.251042	0.107825	0.0720222	0.0380671	0.081281	0.0584405	0.102887	0.143912	0.0652125	8	0.167626	n.s
-92.8	0.189928	0.194249	0.254128	0.0467107	0.0658455	0.155975	0.115849	0.178198	0.15011	0.0698392	8	0.109059	0.172645	0.0979489	0.111528	0.0195474	0.173877	0.0047333	0.125727	0.142214	0.0622623	8	0.167216	n.s
-92.4	0.191162	0.202273	0.25598	0.107208	0.0923916	0.205979	0.118936	0.139307	0.164154	0.0578405	8	0.129431	0.173262	0.0967144	0.160298	-0.000824024	0.115232	0.0176977	0.107825	0.140285	0.0622351	8	0.0508091	n.s
-92	0.177581	0.163382	0.25598	0.138074	0.130665	0.242399	0.0621441	0.104119	0.159293	0.0658547	8	0.146099	0.15042	0.0781947	0.180052	0.00967134	0.0590578	0.0349828	0.105356	0.135809	0.0603312	8	0.0629934	n.s
-91.7	0.204127	0.185605	0.210299	0.128196	0.117701	0.246721	0.0942433	0.176346	0.170405	0.0523438	8	0.113382	0.288699	0.0294255	0.222646	0.0195474	0.0806637	0.0676993	0.088688	0.154174	0.0943351	8	0.16634	n.s
-91.3	0.178817	0.226965	0.262772	0.157829	0.163999	0.251659	0.0825155	0.201656	0.190777	0.0585346	8	0.103504	0.223881	0.0843672	0.141778	0.0380671	0.136221	0.059675	0.0998006	0.151242	0.0575323	8	0.0155788	p<0.05
-90.9	0.130048	0.219558	0.197954	0.189311	0.13869	0.224496	0.105973	0.257215	0.182906	0.0528206	8	0.0701704	0.183138	0.0615268	0.1319	-0.0471222	0.141161	0.052268	0.110911	0.128324	0.0705923	8	0.00941639	p<0.05
-90.5	0.151037	0.307834	0.215237	0.123258	0.142393	0.273265	0.0979468	0.272648	0.197952	0.0797249	8	0.100418	0.192399	0.0985661	0.175114	-0.0211955	0.115849	0.0960971	0.164618	0.155564	0.0670349	8	0.0418705	p<0.05
-90.2	0.160915	0.238078	0.289933	0.11832	0.106588	0.325736	0.0936261	0.160913	0.186764	0.0875981	8	0.112765	0.234376	0.0874535	0.134988	0.0374498	0.113997	0.120172	0.199806	0.170456	0.0618957	8	0.15992	n.s
-89.8	0.176346	0.206594	0.263389	0.177583	0.124491	0.336849	0.120172	0.119553	0.190622	0.0771766	8	0.157829	0.202892	0.086219	0.0930108	0.0195474	0.180052	0.0621441	0.193014	0.164669	0.0680299	8	0.0901737	n.s
-89.4	0.145482	0.158444	0.231288	0.190545	0.136221	0.253511	0.120172	0.131283	0.170868	0.0492864	8	0.186842	0.23808	0.0417726	0.0985661	0.0133749	0.0917743	0.0590578	0.191162	0.155409	0.0808345	8	0.122381	n.s
-89	0.118938	0.138072	0.174495	0.202275	0.167085	0.183136	0.108442	0.103502	0.149493	0.0372573	8	0.193016	0.232523	0.22635	0.123876	0.0170784	0.152271	0.0825155	0.205979	0.194531	0.0759624	8	0.87802	n.s
-88.6	0.0967123	0.157209	0.226967	0.132517	0.163382	0.212151	0.0856018	0.133134	0.150959	0.0501244	8	0.157829	0.237463	0.175729	0.08375	0.0362153	0.181286	0.112148	0.233757	0.192602	0.0708061	8	0.966533	n.s
-88.3	0.146716	0.130048	0.265858	0.135605	0.123256	0.201656	0.0960951	0.147951	0.155898	0.0535249	8	0.147951	0.196102	0.138692	0.0405381	0.0146094	0.212768	0.146716	0.181904	0.17524	0.0714312	8	0.517656	n.s
-87.9	0.178817	0.228817	0.234374	0.168322	0.062142	0.176346	0.112146	0.15042	0.163923	0.0570623	8	0.199806	0.123258	0.141778	0.141778	0.00164499	0.148568	0.181904	0.207213	0.183574	0.064662	8	0.508853	n.s
-87.5	0.162767	0.284376	0.188693	0.115234	0.129431	0.226967	0.104121	0.171408	0.172875	0.0605332	8	0.250425	0.211534	0.123876	0.167705	0.0368326	0.119555	0.169556	0.241166	0.205411	0.0711894	8	0.817016	n.s
-87.1	0.112146	0.224496	0.175112	0.173877	0.157209	0.230054	0.112146	0.20289	0.173491	0.0454494	8	0.189928	0.212151	0.102887	0.16647	0.0553522	0.141778	0.160915	0.186224	0.192294	0.0512337	8	0.389194	n.s
-86.7	0.163384	0.164616	0.147951	0.177583	0.086217	0.290551	0.20351	0.156592	0.1738	0.0577625	8	0.146716	0.218943	0.134986	0.202892	0.0133749	0.133752	0.154125	0.141778	0.183651	0.0614644	8	0.324147	n.s
-86.4	0.200423	0.148566	0.15968	0.13684	0.120787	0.272031	0.19178	0.128814	0.169865	0.0501338	8	0.136223	0.186224	0.155358	0.10227	-0.0199609	0.129431	0.139309	0.170791	0.165286	0.0639726	8	0.14166	n.s
-86	0.193014	0.145479	0.265241	0.159063	0.168937	0.172025	0.157827	0.0738719	0.166932	0.0529692	8	0.152273	0.188076	0.178817	0.146099	0.0115231	0.174495	0.0917763	0.152889	0.177324	0.058702	8	0.30248	n.s
-85.6	0.195483	0.287462	0.29796	0.167705	0.146714	0.284376	0.14363	0.128196	0.206441	0.0719815	8	0.162149	0.162149	0.188693	0.117086	0.0170784	0.204127	0.0751084	0.205979	0.181877	0.0672354	8	0.0836039	n.s
-85.2	0.258449	0.17326	0.216474	0.141778	0.176964	0.0905398	0.188076	0.134369	0.172489	0.051685	8	0.222646	0.172028	0.217708	0.195485	0.0238682	0.157209	0.109677	0.236226	0.207186	0.0708773	8	0.858726	n.s
-84.8	0.162767	0.0825134	0.15042	0.139309	0.156592	0.218941	0.1961	0.18005	0.160836	0.0409128	8	0.218943	0.277588	0.177583	0.155977	0.0300428	0.0960951	0.0757257	0.194866	0.193683	0.0815594	8	0.821087	n.s
-84.5	0.165853	0.109059	0.167087	0.088688	0.193014	0.242399	0.199187	0.152889	0.164772	0.0493505	8	0.158446	0.271414	0.187459	0.114	0.109059	0.186224	0.124493	0.215855	0.211199	0.0560657	8	0.82081	n.s
-84.1	0.210299	0.171408	0.18499	0.159063	0.12696	0.234992	0.18005	0.194866	0.182828	0.0326222	8	0.20783	0.419571	0.169556	0.102887	0.0386843	0.243018	0.173879	0.281909	0.244997	0.11571	8	0.621106	n.s
-83.7	0.215855	0.0997986	0.174495	0.127579	0.139307	0.141159	0.172643	0.279438	0.168784	0.0568159	8	0.182521	0.205361	0.148568	0.145482	0.0300428	0.198569	0.146099	0.260303	0.204949	0.0669393	8	0.895202	n.s
-83.3	0.252277	0.13869	0.174495	0.123876	0.105971	0.16153	0.185607	0.172643	0.164386	0.0448287	8	0.165853	0.231288	0.109677	0.193014	0.033129	0.207213	0.127579	0.304749	0.211893	0.082806	8	0.833342	n.s
-83	0.223264	0.197952	0.224498	0.119555	0.0411533	0.193631	0.167087	0.139924	0.163383	0.0619398	8	0.131285	0.180669	0.0899225	0.243018	0.0942433	0.105973	0.156594	0.276969	0.200165	0.0696835	8	0.915809	n.s
-82.6	0.22635	0.214003	0.246104	0.245487	0.086217	0.147333	0.19178	0.18684	0.193014	0.0543215	8	0.169556	0.146716	0.185607	0.270796	0.0368326	0.310305	0.177583	0.210299	0.228792	0.0822189	8	0.898185	n.s
-82.2	0.264007	0.183136	0.237463	0.163384	0.0954778	0.127579	0.235609	0.127579	0.179279	0.0613806	8	0.176348	0.286847	0.310922	0.248573	0.0726374	0.183755	0.155977	0.202275	0.244997	0.0765496	8	0.476904	n.s
-81.8	0.243018	0.183753	0.187459	0.133752	0.133134	0.297958	0.193631	0.134369	0.188384	0.058549	8	0.16647	0.217708	0.280674	0.164001	0.0337463	0.182521	0.138692	0.154123	0.207572	0.0701699	8	0.52383	n.s
-81.4	0.167705	0.165851	0.230054	0.183755	0.159061	0.183753	0.183138	0.123874	0.174649	0.029891	8	0.164618	0.207213	0.197954	0.192397	0.00596577	0.105973	0.130667	0.0998006	0.178404	0.0676379	8	0.193189	n.s
-81.1	0.155975	0.193014	0.2745	0.168939	0.166468	0.220175	0.155975	0.154123	0.186146	0.0423268	8	0.161532	0.251042	0.205979	0.23314	0.028191	0.0670821	0.104121	0.225115	0.199856	0.0837705	8	0.440438	n.s
-80.7	0.114615	0.126343	0.359691	0.202892	0.162765	0.16647	0.162149	0.188693	0.185452	0.0761613	8	0.157211	0.254748	0.175112	0.282526	0.0843652	0.165236	0.121407	0.181904	0.218144	0.0648125	8	0.832148	n.s
-80.3	0.112763	0.171408	0.361543	0.159063	0.123874	0.198569	0.189928	0.265239	0.197798	0.0813421	8	0.140543	0.248573	0.19178	0.264624	0.0825134	0.194249	0.0732567	0.171408	0.211199	0.0697614	8	0.489146	n.s
-79.9	0.188076	0.246719	0.338083	0.161532	0.170174	0.209065	0.183755	0.174495	0.208987	0.05869	8	0.149185	0.186224	0.26092	0.224498	0.0800444	0.14363	0.0454762	0.205979	0.202325	0.0727112	8	0.177753	n.s
-79.5	0.16647	0.181902	0.249808	0.158446	0.126343	0.235609	0.198569	0.137455	0.181825	0.0441168	8	0.08375	0.249808	0.260303	0.241783	0.0744891	0.142395	0.0541198	0.199189	0.20356	0.0852841	8	0.595308	n.s
-79.2	0.209682	0.152889	0.20351	0.154742	0.109059	0.239312	0.175729	0.116467	0.170174	0.0457314	8	0.128196	0.18499	0.286847	0.225733	0.0948606	0.298575	0.0781947	0.230054	0.231262	0.0840397	8	0.552146	n.s
-78.8	0.211534	0.175112	0.226967	0.137457	0.117701	0.222644	0.183138	0.0627593	0.167164	0.0575338	8	0.152273	0.222029	0.188076	0.193633	0.147949	0.222646	0.059675	0.291785	0.225089	0.06806	8	0.585635	n.s
-78.4	0.251042	0.283141	0.334997	0.162767	0.145479	0.20783	0.18499	0.117701	0.210993	0.0738664	8	0.186224	0.237463	0.163384	0.160915	0.165851	0.209682	0.0849845	0.186842	0.214748	0.0445417	8	0.254533	n.s
-78	0.246104	0.225113	0.401051	0.136223	0.204742	0.250425	0.126345	0.118936	0.213617	0.0928314	8	0.290551	0.243635	0.0954799	0.185607	0.162765	0.124493	0.128814	0.165236	0.214903	0.0648365	8	0.347882	n.s
-77.7	0.136838	0.18684	0.24919	0.186224	0.201656	0.19178	0.114615	0.118318	0.173183	0.0463705	8	0.231907	0.323886	0.157829	0.155977	0.0744891	0.10227	0.161532	0.199806	0.216292	0.0776841	8	0.93226	n.s
-77.3	0.0609095	0.213386	0.295489	0.153506	0.184988	0.199187	0.119555	0.198569	0.178199	0.0693873	8	0.192399	0.322035	0.114615	0.122024	0.0485624	0.133752	0.17141	0.212768	0.205026	0.0816373	8	0.726944	n.s
-76.9	0.104121	0.15474	0.24919	0.165853	0.131283	0.301044	0.109059	0.307834	0.190391	0.0835963	8	0.260303	0.325738	0.160915	0.146716	0.0584385	0.147333	0.181904	0.251659	0.231956	0.0837189	8	0.976857	n.s
-76.5	0.190545	0.142393	0.254128	0.162767	0.10165	0.186224	0.124493	0.223262	0.173183	0.0508158	8	0.234994	0.278205	0.18499	0.184373	0.0399188	0.11832	0.236845	0.212151	0.226555	0.0756825	8	0.692714	n.s
-76.1	0.183755	0.309685	0.268327	0.151654	0.130048	0.248573	0.182521	0.23314	0.213463	0.0615364	8	0.170174	0.236228	0.169556	0.159063	0.123256	0.149185	0.230054	0.176964	0.21714	0.0385601	8	0.179418	n.s
-75.8	0.181904	0.292402	0.29302	0.186842	0.111528	0.1961	0.215237	0.16153	0.20482	0.062175	8	0.1782	0.280674	0.211534	0.169556	0.165234	0.239312	0.167087	0.217089	0.243916	0.0415245	8	0.963506	n.s
-75.4	0.223264	0.254128	0.277588	0.171408	0.112763	0.218324	0.147951	0.142393	0.193477	0.0584831	8	0.175731	0.376359	0.242401	0.197954	0.159061	0.180669	0.15042	0.270179	0.259427	0.0756014	8	0.461731	n.s
-75	0.205361	0.267708	0.284995	0.233757	0.0991813	0.245485	0.0818982	0.183136	0.20019	0.075064	8	0.148568	0.320183	0.273265	0.16647	0.160296	0.194249	0.124493	0.194866	0.238129	0.0664182	8	0.94716	n.s
-74.6	0.232523	0.244868	0.280057	0.176348	0.0664628	0.123256	0.0639958	0.0954778	0.160374	0.0850388	8	0.183755	0.323886	0.21462	0.171408	0.0757237	0.1961	0.129431	0.163384	0.222619	0.071628	8	0.586244	n.s
-74.2	0.246104	0.336849	0.257217	0.124493	0.0899225	0.125727	0.100418	0.101033	0.17272	0.093518	8	0.161532	0.349196	0.187459	0.176966	0.113997	0.265241	0.179435	0.222646	0.247389	0.0723257	8	0.425967	n.s
-73.9	0.19178	0.268943	0.188076	0.0923916	0.143628	0.0893053	0.109059	0.205359	0.161068	0.063411	8	0.213388	0.276971	0.266476	0.165853	0.107823	0.183755	0.229436	0.193014	0.24492	0.0550274	8	0.165128	n.s
-73.5	0.15474	0.23314	0.199806	0.128814	0.113997	0.234374	0.152889	0.162147	0.172488	0.0453391	8	0.234376	0.217091	0.276352	0.140543	0.120787	0.154123	0.228819	0.147951	0.230336	0.0560081	8	0.503441	n.s
-73.1	0.199189	0.243633	0.252277	0.104121	0.143628	0.134986	0.160915	0.110294	0.16863	0.0572427	8	0.259069	0.19178	0.227584	0.154125	0.129431	0.158446	0.189928	0.172643	0.225706	0.0418632	8	0.516064	n.s
-72.7	0.212151	0.207828	0.321417	0.115851	0.186222	0.205361	0.159678	0.189311	0.199728	0.058542	8	0.239314	0.246721	0.190545	0.164618	0.103502	0.176346	0.202275	0.256597	0.23782	0.0508487	8	0.936129	n.s
-72.3	0.175729	0.11338	0.23314	0.17326	0.179433	0.202273	0.209065	0.266474	0.194094	0.0455998	8	0.288082	0.182521	0.225115	0.143013	0.122639	0.231905	0.175731	0.204127	0.236972	0.0527266	8	0.919173	n.s
-72	0.209065	0.220793	0.334997	0.146716	0.181284	0.154123	0.30907	0.23993	0.224497	0.0683715	8	0.244252	0.211534	0.257834	0.137457	0.15474	0.178817	0.175731	0.188076	0.233886	0.0418223	8	0.29703	n.s
-71.6	0.210299	0.0812789	0.304132	0.0985661	0.140541	0.202273	0.231288	0.307834	0.197027	0.0856987	8	0.19672	0.343023	0.249808	0.128196	0.192397	0.193631	0.157211	0.149802	0.241679	0.0681778	8	0.912781	n.s
-71.2	0.165853	0.151654	0.324504	0.156594	0.0874515	0.144247	0.164001	0.320181	0.189311	0.0857649	8	0.220177	0.326355	0.313391	0.118938	0.208446	0.278821	0.146716	0.183755	0.264905	0.0759296	8	0.398784	n.s
-70.8	0.171408	0.243016	0.238697	0.18499	0.109059	0.126962	0.146099	0.22141	0.180205	0.0510244	8	0.262772	0.324504	0.286847	0.135605	0.172025	0.264007	0.125727	0.210917	0.263131	0.0731795	8	0.200798	n.s
-70.5	0.205361	0.205359	0.218326	0.236845	0.152889	0.185607	0.107208	0.229436	0.192629	0.0434573	8	0.305367	0.312774	0.276352	0.161532	0.121405	0.210917	0.104121	0.254128	0.258655	0.0818205	8	0.449845	n.s
-70.1	0.242401	0.209063	0.260303	0.202275	0.171408	0.26771	0.0930088	0.223879	0.208756	0.0564772	8	0.318948	0.318948	0.312156	0.206596	0.134369	0.212768	0.193016	0.249808	0.283657	0.0685594	8	0.290218	n.s
-69.7	0.355368	0.326971	0.268327	0.184373	0.143628	0.197952	0.130665	0.217089	0.228047	0.0820819	8	0.244252	0.467104	0.310922	0.151654	0.128194	0.223264	0.168322	0.291785	0.288517	0.109865	8	0.68466	n.s
-69.3	0.328207	0.309685	0.235609	0.193631	0.163999	0.222027	0.123258	0.23314	0.226195	0.0687189	8	0.290551	0.409076	0.278823	0.133136	0.083748	0.170174	0.138692	0.29734	0.265523	0.110296	8	0.982963	n.s
-68.9	0.26771	0.272648	0.205979	0.147333	0.141159	0.201656	0.105973	0.158444	0.187613	0.0603293	8	0.253513	0.520811	0.281292	0.160915	0.0707856	0.266476	0.139926	0.323269	0.292454	0.137375	8	0.252989	n.s
-68.6	0.275117	0.281907	0.204127	0.162767	0.183753	0.280055	0.127579	0.133752	0.206132	0.0652033	8	0.20351	0.261538	0.280057	0.162767	0.117701	0.210917	0.122024	0.325738	0.250862	0.0751095	8	0.902258	n.s
-68.2	0.296723	0.230669	0.23808	0.225115	0.149802	0.200421	0.10227	0.127579	0.196332	0.0650112	8	0.2566	0.282526	0.270179	0.117703	0.123256	0.243018	0.139309	0.27944	0.254334	0.0735598	8	0.618704	n.s
-67.8	0.283761	0.25104	0.189928	0.116469	0.175112	0.210299	0.129431	0.10659	0.182829	0.0641114	8	0.27265	0.228202	0.280057	0.19672	0.0670801	0.198569	0.214005	0.282526	0.257807	0.0704338	8	0.321114	n.s
-67.4	0.299192	0.273883	0.196102	0.146716	0.204125	0.270796	0.157827	0.16153	0.213771	0.0596688	8	0.248573	0.408458	0.254746	0.276971	0.0633765	0.199806	0.273885	0.349813	0.299784	0.102139	8	0.297485	n.s
-67	0.268945	0.332526	0.225733	0.148568	0.157827	0.238695	0.164618	0.20783	0.218093	0.0627856	8	0.241166	0.307218	0.212768	0.320183	0.0670801	0.277586	0.213388	0.372036	0.291759	0.0926603	8	0.415639	n.s
-66.7	0.295489	0.387468	0.292402	0.180052	0.144245	0.163382	0.146716	0.186222	0.224497	0.0893436	8	0.281909	0.30907	0.222029	0.364012	0.0769582	0.273265	0.229436	0.34611	0.303179	0.0903268	8	0.407583	n.s
-66.3	0.223881	0.267091	0.223881	0.118938	0.110911	0.188693	0.117701	0.162147	0.176655	0.0587047	8	0.244252	0.329442	0.217708	0.360308	0.101033	0.216472	0.260303	0.278203	0.291296	0.0790697	8	0.0525703	n.s
-65.9	0.143013	0.239312	0.23808	0.138692	0.112763	0.181284	0.109059	0.159678	0.165235	0.0509757	8	0.231288	0.429447	0.205361	0.215239	0.103502	0.259684	0.233759	0.246721	0.280956	0.090142	8	0.0638235	n.s
-65.5	0.161532	0.320181	0.337466	0.226967	0.0701684	0.204125	0.122641	0.181284	0.203046	0.0915588	8	0.262155	0.419571	0.262772	0.22635	0.107206	0.178817	0.193016	0.280674	0.281651	0.0915478	8	0.417132	n.s
-65.2	0.165236	0.31092	0.300429	0.169556	0.130665	0.228202	0.180669	0.118936	0.200577	0.0727713	8	0.276971	0.369567	0.296106	0.234994	0.0584385	0.160298	0.236228	0.338083	0.286666	0.0999699	8	0.314612	n.s
-64.8	0.15474	0.310303	0.280057	0.138074	0.183753	0.194249	0.23993	0.231288	0.216549	0.0599266	8	0.277588	0.361543	0.310922	0.212768	0.0454741	0.16647	0.275119	0.336231	0.288595	0.103614	8	0.469028	n.s
-64.4	0.149185	0.292402	0.303515	0.123258	0.171408	0.167705	0.281907	0.201038	0.211302	0.0709862	8	0.307218	0.41031	0.248573	0.19178	0.105971	0.179435	0.273885	0.372653	0.301558	0.101906	8	0.276856	n.s
-64	0.152271	0.326353	0.257834	0.12511	0.122022	0.147333	0.269562	0.146716	0.1934	0.0787223	8	0.316479	0.304749	0.215855	0.220177	0.160913	0.189928	0.257217	0.366481	0.294305	0.0702149	8	0.126911	n.s
-63.6	0.19178	0.225731	0.248573	0.141778	0.139307	0.178198	0.228202	0.132517	0.185761	0.0453005	8	0.334999	0.367715	0.216472	0.147333	0.203508	0.165236	0.201658	0.386852	0.293302	0.0949344	8	0.100764	n.s
-63.3	0.239312	0.284993	0.190545	0.156594	0.140541	0.157209	0.23993	0.134986	0.193014	0.0554718	8	0.253513	0.388087	0.257215	0.141778	0.205359	0.210299	0.162767	0.37574	0.289675	0.0908924	8	0.161332	n.s
-62.9	0.259066	0.319564	0.23808	0.174495	0.188074	0.183136	0.251659	0.091157	0.213154	0.0691198	8	0.266476	0.340554	0.197337	0.195485	0.186222	0.28623	0.197337	0.427595	0.302485	0.0867908	8	0.233098	n.s
-62.5	0.299192	0.252894	0.29734	0.151037	0.176964	0.163382	0.222029	0.102268	0.208138	0.0716021	8	0.381297	0.352899	0.238697	0.237463	0.141159	0.244252	0.275119	0.373271	0.32085	0.0831235	8	0.0835873	n.s
-62.1	0.307218	0.253511	0.244252	0.159063	0.147949	0.170791	0.243018	0.154123	0.209991	0.0594169	8	0.429447	0.307836	0.257215	0.278205	0.167703	0.225115	0.268945	0.354751	0.326482	0.0798765	8	0.049789	p<0.05
-61.7	0.310922	0.200421	0.308453	0.159063	0.155358	0.213386	0.28129	0.179433	0.226041	0.0649395	8	0.434385	0.338085	0.288082	0.301663	0.170791	0.231288	0.252896	0.27944	0.327409	0.0778063	8	0.111262	n.s
-61.4	0.325121	0.212768	0.35722	0.133134	0.224496	0.155358	0.26771	0.214003	0.236226	0.0773512	8	0.474511	0.447349	0.22635	0.239314	0.0954778	0.195483	0.268327	0.275117	0.318072	0.126313	8	0.443818	n.s
-61	0.33438	0.22141	0.268327	0.134988	0.184371	0.230054	0.246104	0.220175	0.229976	0.0584356	8	0.449201	0.518959	0.217708	0.269562	0.0738719	0.235609	0.22635	0.34611	0.332502	0.141544	8	0.279279	n.s
-60.6	0.28623	0.246719	0.264007	0.154123	0.16153	0.238078	0.175112	0.297958	0.22797	0.0569541	8	0.480068	0.470807	0.201658	0.291168	0.147949	0.201041	0.15536	0.343023	0.326714	0.133924	8	0.284221	n.s
-60.2	0.252894	0.241781	0.281292	0.197954	0.225731	0.279438	0.147333	0.224496	0.231365	0.04413	8	0.457228	0.515253	0.268327	0.305984	0.134986	0.200423	0.180052	0.371419	0.344539	0.135533	8	0.184295	n.s
-59.8	0.273883	0.276352	0.265241	0.250425	0.2745	0.193631	0.154123	0.213386	0.237693	0.0456636	8	0.386852	0.497351	0.271414	0.280057	0.119553	0.296106	0.228819	0.299192	0.337748	0.110386	8	0.189824	n.s
-59.5	0.251042	0.222644	0.311539	0.182521	0.199187	0.255363	0.204127	0.19178	0.227275	0.0431995	8	0.380063	0.519576	0.217708	0.317097	0.15042	0.280055	0.207213	0.36216	0.344617	0.117587	8	0.116618	n.s
-59.1	0.194866	0.262153	0.352899	0.186224	0.193631	0.243633	0.209065	0.184988	0.228432	0.0576219	8	0.342406	0.588098	0.210299	0.321417	0.141776	0.323269	0.246104	0.316477	0.351561	0.131501	8	0.135202	n.s
-58.7	0.207213	0.464015	0.270796	0.14363	0.136221	0.218324	0.15474	0.15474	0.21871	0.109313	8	0.358457	0.448584	0.307836	0.415248	0.127577	0.310305	0.361543	0.305984	0.369772	0.0967785	8	0.0502359	n.s
-58.3	0.19178	0.254746	0.217708	0.110294	0.0973296	0.194249	0.254128	0.115849	0.17951	0.0639781	8	0.360308	0.421423	0.304749	0.429447	0.130048	0.372653	0.373271	0.30228	0.377103	0.095527	8	0.00215893	p<0.05
-58	0.254746	0.331291	0.291785	0.0874535	0.134369	0.260301	0.275734	0.157827	0.224188	0.0862745	8	0.360926	0.563405	0.275117	0.396728	0.189309	0.309687	0.25413	0.377592	0.381192	0.113505	8	0.0375321	p<0.05
-57.6	0.263389	0.314008	0.359691	0.0905398	0.146097	0.229436	0.1961	0.230054	0.228664	0.0866983	8	0.414631	0.382532	0.305984	0.330676	0.182519	0.249808	0.23808	0.401669	0.353568	0.084531	8	0.0682768	n.s
-57.2	0.265858	0.354751	0.38068	0.145482	0.225113	0.269562	0.181904	0.301661	0.265626	0.0806936	8	0.334999	0.480685	0.259069	0.268945	0.183753	0.32759	0.278205	0.394259	0.356269	0.0911153	8	0.262127	n.s
-56.8	0.287464	0.368331	0.343641	0.165853	0.228817	0.339318	0.201658	0.234374	0.271182	0.0743285	8	0.336233	0.524514	0.264007	0.305367	0.199187	0.283761	0.28623	0.406607	0.366068	0.099804	8	0.23699	n.s
-56.4	0.270796	0.385616	0.261538	0.21462	0.198569	0.334997	0.238695	0.30413	0.27612	0.0628812	8	0.330676	0.588715	0.349813	0.298577	0.17326	0.254746	0.329442	0.422657	0.383816	0.122868	8	0.196302	n.s
-56.1	0.218941	0.435002	0.246721	0.146716	0.140541	0.310305	0.299809	0.260918	0.257369	0.0953583	8	0.301046	0.651064	0.418952	0.326355	0.123874	0.254128	0.378828	0.449201	0.403261	0.154923	8	0.12747	n.s
-55.7	0.213386	0.360306	0.280057	0.128196	0.172643	0.323267	0.259684	0.234374	0.246489	0.0763818	8	0.294873	0.591184	0.441794	0.376976	0.0967123	0.259684	0.298577	0.550441	0.404111	0.162118	8	0.0939792	n.s
-55.3	0.227584	0.423272	0.307218	0.172025	0.178198	0.341169	0.312774	0.251042	0.276661	0.0858591	8	0.257217	0.504143	0.328207	0.328207	0.154123	0.382532	0.343023	0.480066	0.38752	0.113167	8	0.183566	n.s
-54.9	0.189311	0.473274	0.239314	0.18499	0.166468	0.305982	0.248573	0.220175	0.253511	0.0991244	8	0.218326	0.472659	0.312156	0.291785	0.246102	0.390556	0.374505	0.445498	0.384279	0.0918627	8	0.0793741	n.s
-54.5	0.230054	0.412777	0.286847	0.181904	0.138072	0.307218	0.214003	0.1961	0.245872	0.0868129	8	0.25413	0.460314	0.360308	0.245487	0.257215	0.378209	0.391173	0.466486	0.391996	0.0902665	8	0.0315328	p<0.05
-54.2	0.220795	0.41216	0.204744	0.197954	0.155358	0.254128	0.271414	0.233757	0.243789	0.0768055	8	0.225733	0.414631	0.345492	0.230671	0.218941	0.334997	0.433151	0.494882	0.377642	0.105491	8	0.0640065	n.s
-53.8	0.246104	0.429445	0.21462	0.138074	0.167085	0.265856	0.284378	0.208448	0.244251	0.0892549	8	0.244252	0.430682	0.305367	0.278823	0.249806	0.28623	0.478833	0.468955	0.383199	0.0994251	8	0.0558119	n.s
-53.4	0.26092	0.369565	0.277588	0.15968	0.206594	0.308453	0.306601	0.213386	0.262848	0.0674625	8	0.281909	0.386852	0.18499	0.33438	0.224496	0.320798	0.486858	0.509081	0.381501	0.115563	8	0.125365	n.s
-53	0.247956	0.411543	0.245487	0.192397	0.139307	0.306599	0.287464	0.234374	0.258141	0.0810755	8	0.381914	0.462783	0.224498	0.311539	0.243633	0.2745	0.4634	0.485006	0.39624	0.106093	8	0.0586672	n.s
-52.7	0.20783	0.371417	0.197954	0.241783	0.16153	0.210917	0.259066	0.288079	0.242322	0.0651501	8	0.354136	0.65415	0.293637	0.272031	0.275117	0.288699	0.442411	0.491179	0.42425	0.136493	8	0.0243339	p<0.05
-52.3	0.180669	0.368948	0.275734	0.192397	0.1961	0.318946	0.174495	0.310922	0.252276	0.0755604	8	0.34611	0.542417	0.352282	0.255365	0.314625	0.254746	0.349813	0.420803	0.39485	0.093484	8	0.0312156	p<0.05
-51.9	0.179435	0.385616	0.312156	0.228819	0.192397	0.189928	0.188693	0.314008	0.248882	0.0778786	8	0.471424	0.556614	0.476362	0.231288	0.243016	0.264007	0.354134	0.404755	0.41553	0.122047	8	0.0297777	p<0.05
-51.5	0.181286	0.383764	0.317095	0.201041	0.180667	0.22141	0.225115	0.234374	0.243094	0.0713336	8	0.446115	0.714647	0.383766	0.305367	0.257832	0.300427	0.333145	0.454756	0.439837	0.145377	8	0.0207942	p<0.05
-51.1	0.216472	0.360924	0.340554	0.192397	0.187457	0.224496	0.223264	0.337466	0.260379	0.0727146	8	0.404755	0.660322	0.383149	0.272031	0.253511	0.29734	0.352282	0.503526	0.431195	0.135634	8	0.0358946	p<0.05
-50.8	0.26771	0.368948	0.32759	0.21462	0.216472	0.296723	0.206596	0.26277	0.270179	0.0583474	8	0.424509	0.616493	0.436237	0.313391	0.332526	0.250425	0.378828	0.5597	0.454344	0.123976	8	0.0141322	p<0.05
-50.4	0.24487	0.44673	0.390556	0.209682	0.238695	0.246104	0.210917	0.256597	0.280519	0.0881341	8	0.418954	0.641805	0.364012	0.369567	0.348577	0.342406	0.369567	0.611555	0.473636	0.121784	8	0.0132421	p<0.05
-50	0.261538	0.371417	0.3208	0.201041	0.212151	0.314008	0.245487	0.252277	0.27234	0.0583677	8	0.376976	0.718351	0.351665	0.340554	0.318946	0.344875	0.413396	0.74366	0.491383	0.175168	8	0.0240577	p<0.05
-49.6	0.301663	0.430062	0.351048	0.209065	0.26277	0.351048	0.246104	0.225731	0.297186	0.0757282	8	0.411545	0.76712	0.379443	0.315862	0.272031	0.351665	0.413396	0.737487	0.496399	0.189002	8	0.0540998	n.s
-49.2	0.304132	0.457843	0.276352	0.254128	0.217706	0.333145	0.262772	0.268945	0.296878	0.0734245	8	0.394879	0.71403	0.376974	0.254748	0.281907	0.30907	0.386235	0.659088	0.462447	0.1715	8	0.088403	n.s
-48.9	0.26771	0.444261	0.281909	0.18499	0.215855	0.312774	0.236226	0.257832	0.275195	0.0788986	8	0.423274	0.636248	0.389939	0.269562	0.251659	0.306601	0.42204	0.680077	0.462755	0.159957	8	0.0411993	p<0.05
-48.5	0.32759	0.422655	0.280057	0.201041	0.206594	0.275117	0.202892	0.263387	0.272417	0.0756153	8	0.330059	0.588715	0.38068	0.305367	0.256597	0.324504	0.420188	0.599208	0.440995	0.128833	8	0.0329575	p<0.05
-48.1	0.30228	0.402901	0.331293	0.261538	0.192397	0.282524	0.193631	0.286845	0.281676	0.0694237	8	0.359691	0.604148	0.369567	0.255982	0.264622	0.347344	0.458462	0.507846	0.436288	0.120111	8	0.0394708	p<0.05
-47.7	0.278821	0.477597	0.318948	0.194866	0.230051	0.272648	0.229436	0.34549	0.293482	0.0892437	8	0.382532	0.478833	0.391173	0.288699	0.220175	0.352899	0.467104	0.432533	0.417074	0.0884594	8	0.0819328	n.s
-47.3	0.26771	0.413394	0.312156	0.241166	0.193014	0.32759	0.163384	0.364627	0.28538	0.0852291	8	0.44488	0.598591	0.467104	0.367098	0.176346	0.300427	0.447967	0.471424	0.44956	0.127444	8	0.040957	p<0.05
-47	0.254128	0.526981	0.357837	0.202275	0.238078	0.314625	0.190545	0.412162	0.312079	0.115858	8	0.406607	0.589332	0.494882	0.406607	0.165234	0.326973	0.464635	0.536859	0.464221	0.132948	8	0.0949441	n.s
-46.6	0.277586	0.436237	0.376974	0.218326	0.220175	0.32759	0.268327	0.376974	0.312774	0.0796551	8	0.445498	0.68872	0.498586	0.351048	0.184371	0.370802	0.454756	0.681928	0.499794	0.168645	8	0.050369	n.s
-46.2	0.310305	0.390554	0.373271	0.347961	0.292402	0.197952	0.354751	0.327588	0.324348	0.060312	8	0.475745	0.714647	0.512167	0.375123	0.117084	0.426978	0.415867	0.585011	0.493158	0.173561	8	0.0805756	n.s
-45.8	0.373271	0.445496	0.303515	0.294871	0.343638	0.273883	0.346727	0.331911	0.339164	0.0535775	8	0.432533	0.706005	0.477597	0.370802	0.155975	0.368333	0.355988	0.433768	0.452955	0.153029	8	0.233149	n.s
-45.5	0.4171	0.353517	0.307836	0.300429	0.218324	0.347342	0.352282	0.326353	0.327898	0.0570112	8	0.42883	0.630075	0.423274	0.40352	0.178198	0.465252	0.373888	0.457843	0.46044	0.124537	8	0.0865863	n.s
-45.1	0.368333	0.462781	0.322035	0.249808	0.181284	0.289933	0.363393	0.366479	0.325506	0.0858572	8	0.560936	0.701065	0.317095	0.430682	0.193631	0.415865	0.36895	0.467721	0.472324	0.153324	8	0.11454	n.s
-44.7	0.34611	0.502289	0.290551	0.15968	0.180667	0.302278	0.301661	0.256597	0.292479	0.105901	8	0.639953	0.623285	0.323269	0.43562	0.186222	0.438089	0.443029	0.519574	0.49146	0.149751	8	0.0299262	p<0.05
-44.3	0.439323	0.631307	0.361543	0.225115	0.181902	0.302896	0.288082	0.243016	0.334148	0.14471	8	0.712178	0.645508	0.289316	0.488092	0.225113	0.475128	0.495499	0.464017	0.514687	0.161669	8	0.0892381	n.s
-43.9	0.507846	0.586861	0.386852	0.209065	0.231905	0.282524	0.270796	0.267091	0.342868	0.138088	8	0.658471	0.517105	0.378826	0.513402	0.204742	0.399815	0.441177	0.509081	0.493158	0.132677	8	0.126683	n.s
-43.6	0.472659	0.499203	0.462166	0.210299	0.1961	0.362158	0.365246	0.362775	0.366326	0.114331	8	0.634396	0.555996	0.526983	0.459697	0.236843	0.240549	0.485006	0.494265	0.494547	0.143231	8	0.19746	n.s
-43.2	0.384383	0.560317	0.430682	0.226967	0.190545	0.390556	0.467721	0.384381	0.379444	0.120853	8	0.562788	0.693658	0.533156	0.381297	0.233757	0.278203	0.558467	0.531304	0.511909	0.157956	8	0.212603	n.s
-42.8	0.372036	0.457225	0.370802	0.193631	0.214003	0.42389	0.490561	0.376357	0.362313	0.106945	8	0.544886	0.688103	0.602294	0.397348	0.204125	0.259684	0.593036	0.562169	0.521786	0.174627	8	0.12663	n.s
-42.4	0.336849	0.5134	0.377592	0.268945	0.220175	0.360306	0.498586	0.403518	0.372421	0.101478	8	0.48871	0.575751	0.57822	0.39179	0.193631	0.259066	0.672052	0.599208	0.510134	0.172276	8	0.194919	n.s
-42	0.339318	0.530068	0.323269	0.205979	0.272648	0.381912	0.508464	0.404753	0.370801	0.110611	8	0.435622	0.65415	0.517105	0.367098	0.259066	0.386852	0.694893	0.656002	0.536679	0.159878	8	0.091827	n.s
-41.7	0.359689	0.572045	0.369567	0.259686	0.273265	0.481918	0.435002	0.351048	0.387778	0.104906	8	0.449818	0.679459	0.492413	0.325121	0.291783	0.466486	0.59921	0.613407	0.530043	0.137165	8	0.1187	n.s
-41.3	0.407841	0.460929	0.396111	0.194866	0.260918	0.361541	0.407841	0.389319	0.359921	0.0878445	8	0.514636	0.669583	0.453522	0.349196	0.262153	0.481918	0.506612	0.701683	0.532743	0.146888	8	0.0501032	n.s
-40.9	0.436854	0.49982	0.43994	0.265858	0.226348	0.370184	0.384383	0.437471	0.382607	0.0934906	8	0.514019	0.749835	0.502908	0.438091	0.264622	0.502906	0.431299	0.756007	0.560291	0.16429	8	0.0641597	n.s
-40.5	0.396728	0.464015	0.462166	0.242401	0.197335	0.336849	0.388704	0.477597	0.370724	0.104993	8	0.589949	0.50476	0.580689	0.407224	0.299192	0.569578	0.3992	0.599825	0.534132	0.112259	8	0.0399994	p<0.05
-40.2	0.408458	0.538711	0.488092	0.217708	0.228817	0.416483	0.388087	0.636248	0.415326	0.143405	8	0.552293	0.562788	0.575751	0.354134	0.244868	0.467104	0.443646	0.602294	0.51569	0.124585	8	0.386792	n.s
-39.8	0.397963	0.450434	0.44488	0.271414	0.241164	0.323884	0.405372	0.57081	0.38824	0.10705	8	0.509081	0.63131	0.639951	0.395494	0.236843	0.449201	0.549824	0.726375	0.55759	0.156301	8	0.0773359	n.s
-39.4	0.423274	0.443027	0.465869	0.255363	0.223262	0.383764	0.399815	0.570193	0.395571	0.112097	8	0.497353	0.756624	0.604766	0.402903	0.277586	0.426361	0.609704	0.834407	0.591543	0.186715	8	0.0672122	n.s
-39	0.339935	0.606615	0.472042	0.244252	0.215855	0.440558	0.426361	0.536859	0.41031	0.136211	8	0.601679	0.685634	0.541797	0.367098	0.32265	0.427595	0.567109	0.921448	0.594707	0.192492	8	0.108386	n.s
-38.6	0.339935	0.36401	0.486858	0.208448	0.18684	0.374505	0.48871	0.547353	0.374582	0.130735	8	0.559085	0.667732	0.542415	0.317714	0.28561	0.400432	0.562788	0.854161	0.564072	0.187994	8	0.0892722	n.s
-38.3	0.344875	0.39364	0.491796	0.313391	0.155975	0.564021	0.551058	0.595505	0.426283	0.151644	8	0.48871	0.733784	0.466486	0.310305	0.290548	0.392408	0.476982	0.889963	0.546479	0.206894	8	0.394712	n.s
-37.9	0.38747	0.485004	0.574516	0.294254	0.220793	0.567724	0.478831	0.532537	0.442641	0.130111	8	0.505995	0.829468	0.459694	0.315862	0.331291	0.399815	0.477599	0.917127	0.569937	0.223639	8	0.361738	n.s
-37.5	0.505995	0.583158	0.527601	0.261538	0.201038	0.585627	0.381912	0.480066	0.440867	0.145236	8	0.539948	0.830086	0.426361	0.312774	0.325736	0.485006	0.525749	1.00972	0.597253	0.243833	8	0.271072	n.s
-37.1	0.467104	0.598591	0.494265	0.326355	0.195483	0.539946	0.374505	0.378826	0.421884	0.129245	8	0.548589	0.781317	0.418334	0.334997	0.356603	0.522661	0.543651	0.786255	0.576881	0.173053	8	0.15718	n.s
-36.7	0.426978	0.613405	0.395494	0.305984	0.270794	0.664643	0.409076	0.352899	0.429909	0.1399	8	0.531304	0.948611	0.457843	0.384383	0.363393	0.466486	0.524514	0.701683	0.587607	0.192931	8	0.18741	n.s
-36.4	0.381295	0.660322	0.38068	0.280057	0.38685	0.581923	0.507229	0.393642	0.4465	0.125577	8	0.614642	0.811566	0.486858	0.457225	0.258449	0.428212	0.472042	0.675139	0.565847	0.169859	8	0.309472	n.s
-36	0.432533	0.562169	0.4171	0.330059	0.397346	0.551676	0.588715	0.492411	0.471501	0.0916576	8	0.677608	0.699831	0.507229	0.395494	0.261536	0.447349	0.430682	0.669583	0.551494	0.157958	8	0.551265	n.s
-35.6	0.447967	0.621431	0.351665	0.395494	0.415248	0.539946	0.664026	0.535625	0.496425	0.111629	8	0.696745	0.744897	0.54118	0.386235	0.23993	0.317095	0.429447	0.61958	0.537219	0.182683	8	0.995221	n.s
-35.2	0.462164	0.565255	0.412779	0.28623	0.434385	0.564021	0.652915	0.508462	0.485776	0.112907	8	0.694893	0.670201	0.572047	0.325738	0.227582	0.326355	0.426978	0.632544	0.524873	0.180421	8	0.987191	n.s
-34.8	0.496117	0.602294	0.422657	0.304749	0.425741	0.520809	0.66094	0.503524	0.492104	0.110806	8	0.620816	0.612173	0.562169	0.341789	0.245485	0.424509	0.4634	0.615876	0.526107	0.14127	8	0.922098	n.s
-34.5	0.562786	0.603529	0.436854	0.323269	0.381295	0.563403	0.705386	0.485621	0.507768	0.1253	8	0.591801	0.818973	0.65415	0.27944	0.251659	0.481918	0.480685	0.655384	0.567082	0.193971	8	0.820063	n.s
-34.1	0.625135	0.567107	0.42204	0.242401	0.320798	0.583158	0.688101	0.501672	0.493801	0.15432	8	0.475128	0.964659	0.575751	0.333145	0.318329	0.507229	0.488092	0.664026	0.581125	0.205945	8	0.614201	n.s
-33.7	0.673904	0.654765	0.441177	0.251659	0.357837	0.63563	0.679459	0.512782	0.525902	0.16254	8	0.476982	1.14368	0.539946	0.376976	0.41216	0.628223	0.533773	0.675756	0.638767	0.242091	8	0.494854	n.s
-33.3	0.633779	0.678223	0.494265	0.321417	0.288697	0.602294	0.574516	0.572662	0.520732	0.143473	8	0.531304	1.25171	0.514019	0.438091	0.401049	0.717733	0.541799	0.707857	0.678276	0.272554	8	0.305646	n.s
-33	0.600443	0.776994	0.529452	0.288699	0.236843	0.568959	0.620814	0.585009	0.525902	0.178402	8	0.578222	1.11405	0.568961	0.406607	0.432531	0.57822	0.581308	0.652915	0.654432	0.218163	8	0.391577	n.s
-32.6	0.578837	0.901691	0.51155	0.247956	0.272031	0.486856	0.709707	0.481918	0.523818	0.214855	8	0.528835	1.00293	0.520192	0.486858	0.46525	0.621431	0.596122	0.73008	0.659293	0.176985	8	0.350662	n.s
-32.2	0.549207	0.92762	0.618962	0.30228	0.305365	0.436237	0.733167	0.503524	0.547045	0.212854	8	0.586863	0.749217	0.615259	0.449201	0.464015	0.538711	0.604766	0.715881	0.63082	0.107163	8	0.616964	n.s
-31.8	0.630075	0.74366	0.644274	0.329442	0.341169	0.366479	0.67267	0.593651	0.540177	0.166871	8	0.663411	0.651064	0.652915	0.490561	0.394259	0.495499	0.616493	0.661557	0.61855	0.103455	8	0.593979	n.s
-31.4	0.568961	0.612171	0.667114	0.302898	0.352899	0.415248	0.622049	0.70909	0.531304	0.152929	8	0.619582	0.597974	0.526366	0.535008	0.441175	0.460929	0.612173	0.773909	0.61122	0.105704	8	0.557806	n.s
-31.1	0.503524	0.673285	0.667114	0.412162	0.305365	0.439323	0.63563	0.730078	0.54581	0.152029	8	0.548589	0.657236	0.490561	0.537477	0.512165	0.447967	0.701067	0.730698	0.61855	0.104291	8	0.627736	n.s
-30.7	0.473276	0.69057	0.693041	0.494265	0.353517	0.477597	0.678842	0.716497	0.572201	0.138068	8	0.507846	0.53007	0.425126	0.487475	0.533154	0.495499	0.760328	0.778848	0.605124	0.130816	8	0.913856	n.s
-30.3	0.492413	0.632542	0.701683	0.591801	0.35228	0.487473	0.691189	0.617728	0.570889	0.118874	8	0.442411	0.585011	0.507229	0.50476	0.522661	0.636865	0.78317	0.795515	0.637533	0.131904	8	0.68153	n.s
-29.9	0.523278	0.679459	0.649212	0.546738	0.420186	0.544266	0.67267	0.631925	0.583467	0.0902467	8	0.531921	0.490561	0.471424	0.536242	0.530068	0.614024	0.762182	0.727611	0.623335	0.10861	8	0.992745	n.s
-29.5	0.530687	0.765883	0.625754	0.566492	0.459694	0.575751	0.634396	0.564638	0.590412	0.0895061	8	0.559085	0.476362	0.544886	0.525132	0.504758	0.681311	0.810332	0.790577	0.651886	0.131354	8	0.713126	n.s
-29.2	0.497351	0.687484	0.638099	0.632544	0.436854	0.584392	0.601677	0.593034	0.583929	0.0806636	8	0.633779	0.472659	0.503526	0.538711	0.526981	0.588098	0.804159	0.770206	0.645095	0.123267	8	0.696119	n.s
-28.8	0.512167	0.889346	0.685017	0.687486	0.377592	0.6239	0.599208	0.636865	0.626448	0.147415	8	0.644891	0.594887	0.54612	0.544269	0.496734	0.64736	0.710326	0.811566	0.66485	0.102176	8	0.976222	n.s
-28.4	0.57143	0.704769	0.749835	0.646126	0.365862	0.784403	0.625752	0.641186	0.63617	0.129333	8	0.605383	0.704771	0.557848	0.543651	0.433766	0.636248	0.703536	0.735018	0.655358	0.101453	8	0.721748	n.s
-28	0.646124	0.692422	0.643037	0.640568	0.384381	0.79675	0.618962	0.635011	0.632157	0.115066	8	0.581308	0.831938	0.508464	0.50476	0.456608	0.611555	0.735018	0.756624	0.663615	0.13665	8	0.890342	n.s
-27.7	0.579454	0.666495	0.57143	0.562171	0.423272	0.872678	0.57822	0.568959	0.602835	0.127644	8	0.576985	0.647977	0.569578	0.434385	0.526981	0.526366	0.751686	0.820208	0.647101	0.127095	8	0.951592	n.s
-27.3	0.541797	0.745512	0.542417	0.560934	0.526981	0.94614	0.607233	0.647975	0.639874	0.143518	8	0.594887	0.799219	0.565874	0.367715	0.467102	0.456608	0.770823	0.970832	0.664463	0.205321	8	0.861779	n.s
-26.9	0.485623	0.748598	0.525749	0.698596	0.516488	0.854159	0.700448	0.720202	0.656233	0.131589	8	0.578839	0.86342	0.53439	0.459697	0.431297	0.486858	0.68872	0.94614	0.664	0.19209	8	0.69916	n.s
-26.5	0.507229	0.811564	0.622666	0.638099	0.501055	0.922682	0.707238	0.870209	0.697593	0.159268	8	0.509698	0.893052	0.510315	0.441794	0.505375	0.601677	0.589332	0.888729	0.657827	0.176105	8	0.356374	n.s
-26.1	0.50476	0.861566	0.664026	0.577602	0.523895	0.913421	0.691807	0.873296	0.701297	0.163508	8	0.478833	0.797367	0.538711	0.373271	0.518957	0.596739	0.563405	0.797367	0.623412	0.148025	8	0.15199	n.s
-25.8	0.550441	1.02454	0.692424	0.539328	0.530685	0.929472	0.662174	0.939348	0.733551	0.201637	8	0.509081	0.809097	0.578837	0.354134	0.602294	0.628223	0.479451	0.759093	0.630357	0.147713	8	0.128649	n.s
-25.4	0.632544	1.11405	0.636865	0.582542	0.462781	0.960339	0.669583	0.847986	0.738336	0.216757	8	0.634396	0.776379	0.572664	0.409693	0.491794	0.602294	0.467104	0.742425	0.627424	0.129606	8	0.117323	n.s
-25	0.625752	1.14924	0.545503	0.657236	0.465867	0.782551	0.69551	0.789341	0.713875	0.207405	8	0.735636	0.72082	0.613407	0.430682	0.495497	0.585009	0.514019	0.654767	0.63406	0.108934	8	0.175877	n.s
-24.6	0.589332	1.23134	0.664026	0.634396	0.471422	0.792427	0.780082	0.776994	0.742502	0.226415	8	0.646743	0.549824	0.581306	0.53007	0.452903	0.655384	0.509081	0.688103	0.617007	0.0813493	8	0.0838471	n.s
-24.2	0.682546	1.34492	0.659705	0.636248	0.471422	0.724523	0.831935	0.77329	0.765574	0.257224	8	0.59921	0.585629	0.495499	0.502291	0.459077	0.731932	0.485623	0.718351	0.612532	0.106131	8	0.0798273	n.s
-23.9	0.661557	1.25541	0.673287	0.54612	0.464633	0.794896	0.846134	0.755388	0.749679	0.240071	8	0.643039	0.67699	0.445498	0.454756	0.557231	0.814035	0.588098	0.74366	0.655744	0.13053	8	0.192577	n.s
-23.5	0.638099	1.25665	0.79675	0.607852	0.625135	0.825763	0.796133	0.641803	0.773523	0.214591	8	0.662794	0.652298	0.447967	0.455991	0.649827	0.677608	0.600445	0.815887	0.660682	0.120907	8	0.106249	n.s
-23.1	0.579454	1.08442	0.82638	0.591184	0.679459	0.76218	0.739339	0.728227	0.74883	0.159319	8	0.506612	0.646126	0.564023	0.388087	0.664643	0.688103	0.664028	0.822059	0.65829	0.130833	8	0.0949958	n.s
-22.7	0.615259	1.16775	0.881939	0.581923	0.662792	0.793662	0.688718	0.744894	0.767118	0.18871	8	0.406607	0.693658	0.58254	0.411545	0.623283	0.654767	0.708474	0.845517	0.656129	0.149084	8	0.0980031	n.s
-22.3	0.672052	1.03627	0.906014	0.544886	0.656617	0.746129	0.620814	0.673902	0.732085	0.161725	8	0.414631	0.73008	0.588098	0.50476	0.487473	0.656002	0.671435	0.868975	0.655512	0.147309	8	0.15309	n.s
-22	0.77823	1.1764	0.86836	0.482537	0.610319	0.757859	0.657236	0.674519	0.750682	0.207719	8	0.479451	0.735018	0.675756	0.536859	0.40537	0.726375	0.657236	1.01837	0.694634	0.18938	8	0.348746	n.s
-21.6	0.889963	1.06713	0.854161	0.501057	0.564021	0.800453	0.783168	0.666495	0.765807	0.18369	8	0.577602	0.747366	0.787491	0.622051	0.362775	0.738105	0.655384	1.11281	0.740779	0.213318	8	0.522268	n.s
-21.2	0.866506	1.00911	0.968363	0.555996	0.492411	0.783168	0.835024	0.652913	0.770436	0.187767	8	0.688103	0.646126	0.784403	0.685634	0.386233	0.622666	0.662794	0.964042	0.72033	0.161558	8	0.319661	n.s
-20.8	0.775761	0.950461	0.978858	0.551676	0.435002	0.854776	0.870827	0.718351	0.766964	0.191258	8	0.685017	0.64736	0.696745	0.714647	0.38685	0.680694	0.639334	0.889346	0.707829	0.137705	8	0.254375	n.s
-20.5	0.811566	1.14553	0.851074	0.589949	0.523895	0.801071	0.954783	0.856628	0.816812	0.195446	8	0.680079	0.775761	0.573281	0.620814	0.432531	0.518957	0.722056	0.850457	0.687072	0.137951	8	0.0662719	n.s
-20.1	0.815887	1.11343	0.810332	0.670201	0.538094	0.776996	0.967746	0.895519	0.823526	0.176233	8	0.673904	0.751069	0.535008	0.568343	0.448582	0.513402	0.705388	0.897373	0.676964	0.147715	8	0.0379542	p<0.05
-19.7	0.793046	1.02948	0.751686	0.62884	0.575131	0.747981	0.978241	0.877616	0.797752	0.158278	8	0.561554	0.661559	0.535625	0.561554	0.431914	0.449201	0.618345	0.869592	0.626498	0.138032	8	0.013052	p<0.05
-19.3	0.732549	0.932558	0.917744	0.533773	0.69736	0.746746	1.01034	0.933175	0.813031	0.160736	8	0.538713	0.67699	0.514019	0.572664	0.38685	0.499203	0.632544	0.823294	0.620865	0.13164	8	0.00716645	p<0.05
-18.9	0.689955	0.927003	0.883174	0.485006	0.69057	0.76218	0.972066	0.925151	0.791888	0.165843	8	0.510933	0.509081	0.547355	0.57143	0.390554	0.468338	0.629458	0.823911	0.596713	0.129159	8	0.00727113	p<0.05
-18.6	0.75539	0.962806	0.822677	0.370184	0.660322	0.782551	0.916509	0.929472	0.774989	0.192316	8	0.465869	0.512784	0.567726	0.560319	0.36401	0.474511	0.568961	0.97392	0.601343	0.180583	8	0.037835	p<0.05
-18.2	0.772058	0.936879	0.836876	0.412162	0.704152	0.624518	0.779465	0.815885	0.735249	0.159646	8	0.452905	0.485006	0.50476	0.449201	0.406605	0.469573	0.618962	0.912806	0.577808	0.16389	8	0.0283296	p<0.05
-17.8	0.851692	0.890581	0.740574	0.497351	0.706003	0.599825	0.753538	0.730078	0.721205	0.126654	8	0.452905	0.649212	0.39179	0.407224	0.39364	0.422655	0.59427	0.887494	0.565229	0.175732	8	0.0239169	p<0.05
-17.4	0.744277	0.843665	0.751069	0.62452	0.72082	0.597356	0.789341	0.699831	0.72136	0.0812461	8	0.432533	0.652298	0.372036	0.366481	0.375123	0.446732	0.555996	0.802922	0.540846	0.158238	8	0.00525505	p<0.05
-17	0.674521	0.672668	0.656619	0.614024	0.658471	0.536859	0.871444	0.605381	0.661248	0.0966154	8	0.442411	0.67699	0.389321	0.336233	0.405987	0.622666	0.473276	0.852309	0.56523	0.17626	8	0.0816862	n.s
-16.7	0.681928	0.72514	0.686251	0.63131	0.615257	0.460312	0.866506	0.620197	0.660863	0.114852	8	0.467721	0.704154	0.384383	0.360926	0.430679	0.532539	0.446115	0.849221	0.562297	0.169997	8	0.079071	n.s
-16.3	0.646124	0.664643	0.76218	0.605383	0.570193	0.646741	0.806626	0.786255	0.686018	0.0877519	8	0.447967	0.597356	0.38747	0.376976	0.480066	0.460312	0.457845	0.866506	0.549642	0.159179	8	0.0190517	p<0.05
-15.9	0.683163	0.7665	0.739956	0.614642	0.587478	0.573281	0.741191	0.879468	0.69821	0.104326	8	0.425126	0.650446	0.4171	0.364629	0.539946	0.385001	0.496117	0.940584	0.567699	0.191384	8	0.0490136	p<0.05
-15.5	0.670201	0.757857	0.643037	0.506612	0.586244	0.614642	0.676373	0.8449	0.662483	0.103785	8	0.439325	0.532539	0.433151	0.379445	0.538711	0.446115	0.467721	0.958487	0.564767	0.183077	8	0.0903298	n.s
-15.2	0.696127	0.784403	0.519574	0.443029	0.441792	0.57081	0.687484	0.75724	0.612557	0.136983	8	0.52328	0.565874	0.392408	0.420805	0.452285	0.597974	0.504143	0.868358	0.580971	0.149807	8	0.333458	n.s
-14.8	0.669583	0.830701	0.580689	0.360926	0.462164	0.621431	0.63563	0.763414	0.615567	0.151699	8	0.548589	0.519576	0.420186	0.412162	0.373269	0.606617	0.49303	0.880087	0.57202	0.160686	8	0.301224	n.s
-14.4	0.687484	0.730696	0.673904	0.348579	0.45846	0.86342	0.564021	0.589947	0.614564	0.16148	8	0.579456	0.510315	0.407224	0.449201	0.339318	0.557231	0.459697	0.814035	0.55489	0.144048	8	0.212496	n.s
-14	0.521426	0.887494	0.636248	0.373888	0.532537	0.898607	0.543649	0.580071	0.62174	0.183138	8	0.630075	0.537477	0.354134	0.473893	0.313391	0.488092	0.39179	0.667732	0.522403	0.126784	8	0.100572	n.s
-13.6	0.592418	0.823911	0.517723	0.397346	0.537477	0.887494	0.547972	0.530068	0.604301	0.165635	8	0.67699	0.520194	0.339937	0.507846	0.351663	0.633779	0.448584	0.547972	0.543701	0.120813	8	0.187489	n.s
-13.3	0.728846	0.781934	0.547355	0.413396	0.495499	0.970832	0.675756	0.464015	0.634704	0.189105	8	0.549207	0.662794	0.430682	0.491796	0.42821	0.507229	0.538096	0.604146	0.56685	0.0807754	8	0.169258	n.s
-12.9	0.686866	0.723289	0.574516	0.478214	0.429445	0.890581	0.653533	0.563403	0.624981	0.146856	8	0.50476	0.599828	0.459077	0.412779	0.470188	0.480066	0.579456	0.724523	0.569165	0.100448	8	0.151557	n.s
-12.5	0.736253	0.64921	0.649829	0.517723	0.424507	0.938113	0.610321	0.661557	0.648439	0.151414	8	0.435002	0.434385	0.485623	0.38068	0.401666	0.421421	0.538096	0.753538	0.521632	0.120567	8	0.0292207	p<0.05
-12.1	0.728227	0.620197	0.596122	0.433151	0.410925	0.747981	0.58254	0.708472	0.603452	0.127798	8	0.394259	0.453522	0.42883	0.460314	0.346725	0.454756	0.528218	0.702917	0.511523	0.107474	8	0.0423334	p<0.05
-11.7	0.767118	0.714645	0.553527	0.460314	0.454756	0.602912	0.567107	0.759093	0.609934	0.125043	8	0.325738	0.48871	0.413396	0.514019	0.352897	0.393025	0.527601	0.643037	0.497633	0.1055	8	0.019816	p<0.05
-11.4	0.725758	0.775759	0.583777	0.412779	0.460929	0.496117	0.657236	0.735016	0.605921	0.138037	8	0.406607	0.461548	0.308453	0.560319	0.396728	0.356603	0.496117	0.677608	0.498328	0.119046	8	0.0380506	p<0.05
-11	0.697979	0.832553	0.634396	0.422657	0.50661	0.533773	0.660322	0.742425	0.628839	0.134532	8	0.483154	0.547355	0.296723	0.580071	0.395494	0.361541	0.44488	0.585011	0.502109	0.106187	8	0.016052	p<0.05
-10.6	0.786872	0.756622	0.576368	0.389321	0.54118	0.504758	0.64242	0.675137	0.609085	0.13294	8	0.459697	0.514019	0.354751	0.535008	0.394259	0.267093	0.488092	0.549824	0.485673	0.098775	8	0.0152057	p<0.05
-10.2	0.806626	0.727609	0.54612	0.367098	0.575748	0.565872	0.686249	0.651062	0.615798	0.134125	8	0.47019	0.527601	0.399197	0.490561	0.315243	0.204127	0.449201	0.602294	0.472632	0.125332	8	0.0134867	p<0.05
-9.8	0.804157	0.744894	0.602912	0.410927	0.587478	0.689335	0.724523	0.73193	0.66202	0.124619	8	0.438091	0.578837	0.375123	0.515871	0.288079	0.285613	0.451053	0.561552	0.477107	0.114001	8	0.00208812	p<0.05
-9.5	0.774527	0.630073	0.575751	0.486858	0.60106	0.522043	0.692424	0.722671	0.625676	0.0993896	8	0.42204	0.58316	0.415248	0.442411	0.318329	0.381912	0.421423	0.585629	0.486599	0.0932371	8	0.00228345	p<0.05
-9.1	0.793046	0.693039	0.53439	0.505377	0.478214	0.523895	0.733167	0.709707	0.621355	0.123013	8	0.369567	0.52328	0.299194	0.386852	0.279438	0.396728	0.373271	0.723906	0.45936	0.143296	8	0.00919299	p<0.05
-8.7	0.776996	0.676371	0.595505	0.523897	0.464015	0.475745	0.726375	0.656002	0.611863	0.116425	8	0.356605	0.462166	0.239932	0.370802	0.263387	0.386235	0.302898	0.799219	0.437986	0.177215	8	0.0143261	p<0.05
-8.3	0.738105	0.590565	0.500437	0.472659	0.418334	0.472659	0.763414	0.644272	0.575056	0.129942	8	0.354753	0.617728	0.247339	0.381297	0.271412	0.428212	0.304132	0.664026	0.448943	0.155263	8	0.0361214	p<0.05
-8	0.633779	0.581306	0.44488	0.454139	0.450434	0.600443	0.765883	0.666495	0.57467	0.11711	8	0.331911	0.577602	0.257834	0.304132	0.272031	0.299192	0.297342	0.554762	0.402181	0.128155	8	0.00381294	p<0.05
-7.6	0.506612	0.64921	0.475128	0.439942	0.486856	0.516488	0.719585	0.512165	0.538248	0.0953487	8	0.376976	0.597974	0.271414	0.330059	0.251659	0.267093	0.333762	0.573281	0.415608	0.136457	8	0.0164264	p<0.05
-7.2	0.43994	0.744894	0.573899	0.472659	0.445496	0.560317	0.744894	0.486856	0.558619	0.124816	8	0.383766	0.48192	0.273883	0.367098	0.243633	0.440558	0.355988	0.618345	0.435979	0.119235	8	0.0183119	p<0.05
-6.8	0.459694	0.638097	0.588715	0.443029	0.375123	0.579454	0.688718	0.588096	0.545116	0.107445	8	0.442411	0.459697	0.365864	0.32759	0.250423	0.289933	0.333762	0.651681	0.4305	0.127176	8	0.0200567	p<0.05
-6.4	0.496734	0.538094	0.590567	0.484389	0.312156	0.542415	0.662792	0.638099	0.533156	0.109395	8	0.386235	0.576368	0.430682	0.281909	0.305365	0.273883	0.334382	0.641186	0.444081	0.138051	8	0.0576067	n.s
-6.1	0.605381	0.779463	0.603531	0.492413	0.302896	0.549822	0.638717	0.636865	0.576136	0.137796	8	0.349813	0.608469	0.38068	0.337468	0.316477	0.251659	0.401669	0.637482	0.450795	0.138753	8	0.0310922	p<0.05
-5.7	0.704152	0.770821	0.591801	0.497351	0.307216	0.541797	0.618345	0.659705	0.586399	0.142509	8	0.352282	0.547972	0.402903	0.342406	0.264622	0.323886	0.398582	0.641803	0.449637	0.125012	8	0.0195364	p<0.05
-5.3	0.723906	0.702917	0.536859	0.510933	0.292402	0.426976	0.510933	0.677608	0.547817	0.148607	8	0.378828	0.644891	0.394877	0.383149	0.236226	0.367715	0.373271	0.604764	0.463295	0.134705	8	0.100328	n.s
-4.9	0.735018	0.567107	0.540563	0.461548	0.402901	0.545501	0.459077	0.578837	0.536319	0.101205	8	0.378211	0.578837	0.457225	0.42204	0.291166	0.418952	0.370802	0.523897	0.470471	0.09052	8	0.0443364	p<0.05
-4.5	0.73687	0.493028	0.516488	0.42204	0.413394	0.504758	0.441792	0.509696	0.504758	0.102351	8	0.325738	0.603531	0.542415	0.483154	0.402284	0.390556	0.412162	0.515871	0.499794	0.0922087	8	0.368318	n.s
-4.2	0.699214	0.533771	0.48871	0.487475	0.512165	0.547353	0.442409	0.545501	0.532075	0.076212	8	0.296725	0.672052	0.507229	0.438091	0.438706	0.399197	0.376359	0.551676	0.500335	0.115811	8	0.166978	n.s
-3.8	0.595505	0.685015	0.636248	0.541799	0.514017	0.537477	0.524512	0.664643	0.587402	0.0674628	8	0.301663	0.636865	0.420805	0.423892	0.384381	0.346727	0.347961	0.501055	0.460749	0.106533	8	0.0028585	p<0.05
-3.4	0.556614	0.793044	0.633779	0.465869	0.544884	0.481918	0.635013	0.555996	0.58339	0.104346	8	0.323269	0.445498	0.372653	0.425126	0.366479	0.426978	0.343023	0.517723	0.442924	0.0635154	8	0.00136684	p<0.05
-3	0.494882	0.641803	0.647977	0.468338	0.51834	0.512784	0.694893	0.622666	0.57521	0.0856163	8	0.33932	0.47019	0.365246	0.41031	0.389319	0.397346	0.375125	0.577602	0.455888	0.0758467	8	0.0014961	p<0.05
-2.7	0.538711	0.794896	0.632544	0.454756	0.546118	0.528833	0.660322	0.551674	0.588482	0.104729	8	0.389939	0.472042	0.39858	0.415865	0.346725	0.341169	0.502291	0.643655	0.479114	0.0997441	8	0.0110462	p<0.05
-2.3	0.499203	0.809712	0.622666	0.478214	0.536859	0.481918	0.562786	0.538711	0.566259	0.109184	8	0.371419	0.604766	0.299194	0.420805	0.347342	0.314625	0.576368	0.735018	0.499023	0.159994	8	0.141492	n.s
-1.9	0.493648	0.721437	0.52328	0.470807	0.447965	0.488707	0.469573	0.557848	0.521658	0.0876875	8	0.420805	0.791195	0.300429	0.386852	0.353517	0.33438	0.731315	0.906631	0.568471	0.240566	8	0.94451	n.s
-1.5	0.544884	0.744277	0.520192	0.426361	0.362158	0.49303	0.396111	0.632542	0.514944	0.127133	8	0.407224	0.96219	0.318329	0.347344	0.331291	0.234374	0.982562	0.946757	0.606589	0.332714	8	0.693166	n.s
-1.1	0.504141	0.669581	0.519574	0.407841	0.381912	0.644272	0.434385	0.733782	0.536936	0.131179	8	0.431299	1.10232	0.381297	0.388087	0.351663	0.369567	1.10479	0.947374	0.67488	0.349332	8	0.478348	n.s
-0.8	0.497351	0.681928	0.563405	0.413396	0.396111	0.603529	0.449201	0.714028	0.539869	0.120599	8	0.597356	1.32641	0.460312	0.396728	0.44673	0.399197	1.17517	0.893669	0.752276	0.372083	8	0.246766	n.s
-0.4	0.655384	0.704152	0.572047	0.449201	0.319564	0.555379	0.555379	0.757859	0.571121	0.140565	8	0.797984	1.32764	0.638099	0.380063	0.451668	0.506612	1.15479	0.967746	0.818406	0.346112	8	0.150667	n.s
0	0.855395	0.810947	0.669583	0.480066	0.294254	0.620814	0.681928	0.80354	0.652066	0.188725	8	0.944288	1.33875	0.807863	0.334997	0.622666	0.599208	1.11035	0.912806	0.874197	0.316001	8	0.18893	n.s
0.4	1.13566	0.969597	0.698596	0.457843	0.264622	0.704152	0.694893	0.851072	0.722054	0.275071	8	1.12208	1.40419	1.00232	0.373888	0.646741	0.73687	1.098	0.877001	0.947966	0.320893	8	0.235136	n.s
0.8	1.16467	1.15788	0.806626	0.443646	0.312774	0.783786	0.644272	0.85169	0.770668	0.303735	8	1.25048	1.43753	1.09491	0.398582	0.641186	0.752304	1.09059	0.961573	0.993725	0.339598	8	0.275923	n.s
1.1	1.18072	1.32579	0.851692	0.472659	0.445496	0.818973	0.686866	0.930706	0.839113	0.310507	8	1.22455	1.59185	1.08997	0.480685	0.641186	0.928237	1.1085	1.05355	1.05515	0.343361	8	0.301378	n.s
1.5	1.07948	1.38196	0.857247	0.461548	0.452285	0.924534	0.794281	1.07948	0.878852	0.316099	8	1.07763	1.59926	1.148	0.589949	0.670816	0.883174	1.25665	1.29431	1.1053	0.337197	8	0.2739	n.s
1.9	0.994909	1.68321	0.906631	0.467721	0.5597	1.00725	0.824528	1.23751	0.960184	0.383086	8	1.03627	1.52148	1.1017	0.706005	0.718348	0.890581	1.42703	1.48259	1.15083	0.333573	8	0.416917	n.s
2.3	0.888112	1.87829	0.940584	0.467104	0.576366	1.05726	0.907866	1.28443	1	0.438104	8	0.986885	1.58938	1.06158	0.806011	0.771438	0.789341	1.39555	1.51284	1.15446	0.33824	8	0.569607	n.s
2.7	0.817739	1.65111	0.997995	0.483771	0.605381	1.02824	1.02454	1.18875	0.974691	0.36081	8	1.08936	1.58506	1.01158	0.839345	0.739954	0.741191	1.36036	1.55728	1.15585	0.347338	8	0.439726	n.s
3	0.82638	1.63445	0.989352	0.501057	0.664026	0.828232	1.07269	1.14121	0.957174	0.345307	8	1.14121	1.46777	0.888112	0.866508	0.859097	0.722054	1.34246	1.67581	1.16071	0.343151	8	0.359098	n.s
3.4	0.977007	1.65914	0.941819	0.447349	0.737485	0.785637	1.0017	1.05849	0.951078	0.347017	8	1.1906	1.3795	0.885025	0.785022	0.848603	0.786255	1.36962	1.53136	1.13733	0.305211	8	0.38716	n.s
3.8	1.11528	1.45419	0.832555	0.469573	0.658471	0.789341	0.825763	0.989969	0.891893	0.299274	8	1.13627	1.39802	0.912189	0.738105	0.822677	0.860333	1.33629	1.3795	1.11325	0.27224	8	0.226495	n.s
4.2	1.14924	1.18442	0.833172	0.475745	0.652913	0.793044	0.712795	0.989352	0.848835	0.245546	8	1.17146	1.44308	0.923917	0.605383	0.691187	0.950461	1.25727	1.37209	1.09219	0.308956	8	0.168815	n.s
4.5	1.0943	1.06899	0.821442	0.552293	0.716497	0.899224	0.723289	0.827615	0.837955	0.182335	8	1.17146	1.59864	0.853543	0.551676	0.7023	0.864654	1.098	1.68877	1.10646	0.408164	8	0.180381	n.s
4.9	1.02516	0.980708	0.742425	0.61958	0.664643	0.859716	0.822059	0.756622	0.808864	0.142851	8	1.09985	1.62149	0.782551	0.502291	0.703534	0.941819	1.05109	1.87767	1.11287	0.46496	8	0.162362	n.s
5.3	0.951695	0.938113	0.671435	0.559083	0.680077	0.788724	0.841814	0.63069	0.757704	0.145046	8	1.13504	1.61902	0.807243	0.501057	0.682546	1.04306	0.914658	1.98014	1.12568	0.492783	8	0.107949	n.s
5.7	0.880705	0.823294	0.731315	0.630075	0.652913	0.857247	0.85169	0.636865	0.758013	0.107399	8	1.1764	1.45481	0.836258	0.557848	0.783786	1.0233	0.925153	1.74742	1.10345	0.385436	8	0.0627681	n.s
6.1	0.824528	0.902309	0.807245	0.626371	0.60785	0.8449	0.868358	0.740574	0.777767	0.109841	8	1.12454	1.25542	0.926386	0.657853	0.843665	1.07331	0.993057	1.53815	1.09188	0.267646	8	0.0246721	p<0.05
6.4	0.686866	0.918359	0.782551	0.630075	0.60106	0.807243	0.820825	0.778848	0.753228	0.106232	8	1.15788	1.27332	1.04923	0.638099	0.796131	0.991821	1.0338	1.39616	1.08239	0.244538	8	0.0125958	p<0.05
6.8	0.66094	1.01775	0.788108	0.7023	0.593034	0.749833	0.875149	0.835639	0.777844	0.133513	8	1.1017	1.20047	1.08874	0.691807	0.807861	0.93256	1.07207	1.28752	1.06317	0.199479	8	0.0134313	p<0.05
7.2	0.757859	1.06405	0.780699	0.68872	0.578837	0.677608	0.783168	0.86774	0.774835	0.145381	8	1.07269	1.16776	1.18134	0.638717	0.758474	0.893669	1.09121	1.38876	1.06441	0.245325	8	0.0303565	p<0.05
7.6	0.901076	0.967746	0.787491	0.678225	0.556614	0.613407	0.767118	0.831318	0.762874	0.140626	8	1.05664	1.31468	1.22455	0.565874	0.704152	0.821442	0.964042	1.52518	1.0624	0.32376	8	0.065829	n.s
8	0.922682	1.00725	0.7023	0.600443	0.504141	0.678842	0.837493	0.744894	0.749756	0.166404	8	0.979476	1.35542	1.13874	0.629458	0.72514	0.877001	0.889966	1.51716	1.05438	0.305183	8	0.0549892	n.s
8.3	0.903545	0.956633	0.700448	0.562171	0.509696	0.539946	0.795515	0.636248	0.700525	0.169582	8	0.987502	1.51222	1.02701	0.761562	0.63069	0.841196	0.922682	1.51345	1.06487	0.326564	8	0.0308947	p<0.05
8.7	0.846134	0.795513	0.712178	0.438706	0.441175	0.478831	0.7023	0.667112	0.635244	0.161399	8	1.01281	1.35789	0.837493	0.867742	0.502906	0.845517	0.899842	1.33937	0.998277	0.281368	8	0.0166445	p<0.05
9.1	0.760328	0.785637	0.708474	0.409693	0.393023	0.462781	0.668347	0.699214	0.610937	0.161854	8	0.903545	1.27085	0.778848	0.836876	0.543032	0.883174	0.85663	1.2369	0.954061	0.238383	8	0.011358	p<0.05
9.5	0.74366	0.644889	0.701683	0.455374	0.383764	0.520192	0.660322	0.705386	0.601909	0.131883	8	0.848605	1.30233	0.738722	0.852309	0.624518	0.847369	0.902311	1.2764	0.964401	0.241574	8	0.00708419	p<0.05
9.8	0.622049	0.650444	0.62884	0.438706	0.339935	0.485621	0.704152	0.623283	0.561629	0.125474	8	0.836258	1.52457	0.719585	0.92083	0.641803	1.06405	0.896755	1.28937	1.02698	0.295745	8	0.00423903	p<0.05
10.2	0.515871	0.659088	0.56464	0.343023	0.352899	0.496734	0.730078	0.48809	0.518803	0.134313	8	0.914658	1.42394	0.785637	0.787491	0.626369	0.959104	0.857864	1.28196	0.994959	0.267963	8	0.00197203	p<0.05
10.6	0.549207	0.653531	0.505377	0.314008	0.306599	0.538094	0.790575	0.420803	0.509774	0.164496	8	0.994292	1.31838	0.820825	0.749835	0.633776	0.935646	0.875149	1.36098	1.00144	0.258606	8	0.00134167	p<0.05
11	0.57143	0.651062	0.426361	0.302898	0.373271	0.455374	0.820208	0.412779	0.501673	0.169184	8	1.10047	1.36962	0.859716	0.663411	0.67205	0.818356	0.862802	1.35913	1.00352	0.282131	8	0.00203747	p<0.05
11.4	0.573281	0.681311	0.409693	0.295489	0.441175	0.468336	0.754155	0.358455	0.497737	0.159139	8	1.19801	1.19986	0.846752	0.636865	0.712176	0.812183	0.806628	1.35789	0.986625	0.265928	8	0.00163949	p<0.05
11.7	0.547355	0.615257	0.473893	0.299811	0.368948	0.449199	0.709707	0.357837	0.477751	0.139523	8	0.99923	1.23011	0.796133	0.62452	0.747363	0.824528	0.791812	1.22023	0.94457	0.223158	8	0.000663838	p<0.05
12.1	0.547972	0.641803	0.472659	0.359691	0.457225	0.438089	0.672052	0.425124	0.501827	0.109341	8	0.73008	1.14924	0.744277	0.636248	0.75724	0.833789	0.806628	1.26344	0.905448	0.220598	8	0.0018107	p<0.05
12.5	0.578837	0.631925	0.507229	0.388087	0.438089	0.452905	0.673287	0.50661	0.522121	0.0988538	8	0.593036	1.36098	0.669583	0.635013	0.706003	0.954783	0.82453	1.10602	0.896574	0.268195	8	0.00932528	p<0.05
12.9	0.535625	0.701683	0.475745	0.355368	0.389937	0.436854	0.631927	0.564638	0.511472	0.119572	8	0.581925	1.28443	0.589332	0.551058	0.607233	1.01405	0.832555	1.01466	0.849736	0.272027	8	0.018348	p<0.05
13.3	0.538094	0.755388	0.620197	0.368333	0.355368	0.554762	0.578837	0.654148	0.553141	0.136151	8	0.680079	1.18504	0.539328	0.617111	0.611553	1.03689	0.806628	0.855395	0.831833	0.226211	8	0.0260529	p<0.05
13.6	0.526983	0.530685	0.656619	0.352282	0.279438	0.54118	0.530687	0.666495	0.510546	0.134236	8	0.736253	1.2048	0.606	0.639951	0.639334	0.979476	0.781317	0.810332	0.840012	0.203419	8	0.00564552	p<0.05
14	0.663409	0.520192	0.572664	0.310305	0.294254	0.448582	0.446115	0.652913	0.488554	0.140706	8	0.864656	1.25727	0.645508	0.664645	0.674519	0.924534	0.765885	0.799836	0.864937	0.201082	8	0.00205172	p<0.05
14.4	0.67267	0.423272	0.577602	0.285613	0.355368	0.451053	0.389939	0.588713	0.468029	0.132453	8	0.908485	1.26344	0.614024	0.641805	0.555377	0.916509	0.737487	0.794898	0.844334	0.227841	8	0.00398747	p<0.05
14.8	0.698596	0.462781	0.547972	0.320183	0.380678	0.509696	0.32759	0.495499	0.467874	0.126085	8	0.890583	1.2585	0.643037	0.533156	0.531919	0.988734	0.710326	0.836258	0.839395	0.248168	8	0.00681323	p<0.05
15.2	0.545503	0.490559	0.468338	0.373271	0.28561	0.512784	0.294871	0.492411	0.432919	0.101055	8	0.856012	1.26714	0.694276	0.425126	0.546118	0.931941	0.790577	0.918979	0.844102	0.258861	8	0.00431125	p<0.05
15.5	0.501672	0.573897	0.455991	0.386235	0.346725	0.483152	0.301661	0.48809	0.442178	0.0901213	8	0.933795	1.29739	0.64736	0.423892	0.5134	0.807243	0.804776	0.996143	0.843331	0.280478	8	0.0078564	p<0.05
15.9	0.393025	0.613405	0.409076	0.29796	0.368331	0.424507	0.371419	0.485621	0.420418	0.0944921	8	0.90972	1.17331	0.585011	0.457225	0.504758	0.888729	0.761562	0.901076	0.813005	0.243744	8	0.004097	p<0.05
16.3	0.421421	0.565255	0.473276	0.303515	0.308451	0.360306	0.430682	0.520809	0.422964	0.0954096	8	0.836876	1.22578	0.595505	0.501674	0.658469	1.14183	0.722673	0.967128	0.871573	0.260891	8	0.00255655	p<0.05
16.7	0.426978	0.489325	0.467721	0.288082	0.259684	0.397346	0.452905	0.407839	0.398735	0.0831194	8	0.735018	1.3332	0.675139	0.507229	0.728227	0.872063	0.644891	0.959721	0.847266	0.253365	8	0.00218517	p<0.05
17	0.436237	0.386233	0.478831	0.281292	0.309685	0.407222	0.4813	0.344256	0.390632	0.0746733	8	0.684399	1.37271	0.753538	0.594887	0.765883	0.71403	0.672052	0.988734	0.858609	0.251696	8	0.00161845	p<0.05
17.4	0.339318	0.317712	0.404755	0.281292	0.383147	0.359689	0.482535	0.336849	0.363162	0.0614361	8	0.713412	1.46716	0.596739	0.567726	0.702917	0.709092	0.654767	0.988117	0.840321	0.298096	8	0.00405627	p<0.05
17.8	0.436854	0.241164	0.37574	0.243635	0.301044	0.372653	0.465869	0.420186	0.357143	0.0863699	8	0.661559	1.34678	0.482537	0.473893	0.599825	0.653533	0.643039	1.00046	0.773034	0.296498	8	0.00853543	p<0.05
18.2	0.408458	0.257215	0.39179	0.285613	0.257832	0.514636	0.397963	0.367713	0.360153	0.0888886	8	0.64057	1.05787	0.604148	0.541799	0.516488	0.621431	0.601679	1.07393	0.74757	0.225116	8	0.00277411	p<0.05
18.6	0.419569	0.258449	0.394877	0.242401	0.265239	0.32265	0.362775	0.321415	0.323422	0.0655466	8	0.611555	0.940584	0.593036	0.654767	0.414012	0.550441	0.627606	1.1017	0.727044	0.223141	8	0.00210207	p<0.05
18.9	0.452287	0.384381	0.359691	0.294254	0.296106	0.348579	0.359689	0.385616	0.360075	0.0511345	8	0.614024	0.956635	0.667732	0.725142	0.372034	0.510315	0.614024	1.08751	0.733757	0.231663	8	0.00444499	p<0.05
19.3	0.420186	0.368331	0.430682	0.295489	0.223879	0.337466	0.306601	0.363393	0.343253	0.0681442	8	0.608469	1.0196	0.662792	0.706005	0.394877	0.547972	0.570195	1.09924	0.741474	0.240352	8	0.00356388	p<0.05
19.7	0.405372	0.378209	0.4171	0.186224	0.301044	0.29734	0.253511	0.451051	0.336231	0.0913089	8	0.614024	1.17763	0.580689	0.632544	0.395494	0.6239	0.557231	0.988734	0.736612	0.255362	8	0.0047409	p<0.05
20.1	0.31586	0.377592	0.426978	0.19672	0.220793	0.323884	0.256597	0.352282	0.308838	0.0791912	8	0.584394	1.24739	0.491179	0.56464	0.402284	0.599208	0.529452	1.03936	0.722568	0.296515	8	0.00881897	p<0.05
20.5	0.24487	0.497351	0.565874	0.19672	0.209063	0.293637	0.295489	0.309687	0.326586	0.134224	8	0.63563	1.15788	0.428212	0.465252	0.389937	0.610938	0.503526	0.972686	0.685838	0.276728	8	0.0147867	p<0.05
20.8	0.251659	0.460929	0.464017	0.215857	0.190545	0.309687	0.329442	0.334997	0.319642	0.102327	8	0.62452	1.05787	0.454756	0.459697	0.406605	0.541797	0.439942	1.03009	0.667241	0.266358	8	0.0138475	p<0.05
21.2	0.264007	0.46525	0.477597	0.230671	0.225731	0.305982	0.256597	0.426976	0.331601	0.107251	8	0.592418	1.04368	0.451053	0.388704	0.496117	0.524512	0.34611	0.997378	0.645326	0.267901	8	0.0247835	p<0.05
21.6	0.299192	0.537477	0.445498	0.20351	0.257832	0.291785	0.262772	0.388702	0.335846	0.111929	8	0.595505	0.933795	0.371419	0.36216	0.543032	0.556614	0.338085	0.975772	0.624878	0.248791	8	0.0280699	p<0.05
22	0.322652	0.423272	0.340554	0.236845	0.231905	0.264005	0.280672	0.30413	0.300505	0.0628644	8	0.569578	0.735636	0.393025	0.418336	0.473274	0.495499	0.396113	0.933795	0.592237	0.191471	8	0.00704681	p<0.05
22.3	0.371419	0.454137	0.396728	0.242401	0.296106	0.213386	0.241164	0.358455	0.321724	0.0863161	8	0.515871	0.757859	0.51834	0.417719	0.344256	0.543649	0.430064	0.956635	0.600879	0.201455	8	0.0123187	p<0.05
22.7	0.382532	0.459694	0.373271	0.223264	0.34549	0.268327	0.197952	0.317712	0.32103	0.0876948	8	0.49303	0.784405	0.498586	0.420805	0.336849	0.525132	0.459697	0.86774	0.588611	0.182314	8	0.00977888	p<0.05
23.1	0.409693	0.441175	0.351048	0.196102	0.289931	0.264622	0.170174	0.396111	0.314857	0.100742	8	0.520811	0.784405	0.439323	0.421423	0.413394	0.468338	0.515253	0.814652	0.58753	0.160843	8	0.0048291	p<0.05
23.5	0.415865	0.371417	0.314008	0.1782	0.294871	0.21462	0.152889	0.389319	0.291399	0.0999289	8	0.59427	0.775144	0.428212	0.457225	0.438706	0.41031	0.491796	0.731932	0.58128	0.143338	8	0.00151384	p<0.05
23.9	0.375123	0.318329	0.29734	0.194866	0.231905	0.301044	0.208448	0.343638	0.283837	0.0653274	8	0.603531	0.679459	0.467721	0.517105	0.379443	0.423892	0.449818	0.703534	0.568393	0.120848	8	0.000410736	p<0.05
24.2	0.281292	0.29734	0.209682	0.191162	0.18005	0.220793	0.22635	0.308451	0.23939	0.0494672	8	0.591801	0.777613	0.472659	0.448584	0.34549	0.386235	0.391173	0.649829	0.548253	0.150946	8	0.00117737	p<0.05
24.6	0.237461	0.245485	0.276969	0.198572	0.162147	0.220175	0.194249	0.313391	0.231056	0.0484223	8	0.596122	0.864037	0.436237	0.424509	0.39364	0.438089	0.369567	0.57822	0.552883	0.164118	8	0.00152926	p<0.05
25	0.241166	0.300427	0.31586	0.183755	0.155358	0.284993	0.160298	0.231905	0.23422	0.0631443	8	0.601062	0.920213	0.404138	0.453522	0.3708	0.331911	0.421423	0.491796	0.539688	0.188728	8	0.00485898	p<0.05
25.4	0.21956	0.28129	0.361543	0.12511	0.144862	0.251042	0.1961	0.248573	0.22851	0.0757936	8	0.601062	0.90478	0.318329	0.480068	0.351663	0.41031	0.453522	0.557231	0.549951	0.186013	8	0.00312971	p<0.05
25.8	0.197335	0.234374	0.330676	0.088688	0.170174	0.21462	0.225733	0.309687	0.221411	0.0763308	8	0.525749	0.712795	0.3208	0.475745	0.245485	0.381295	0.449201	0.761562	0.524409	0.179874	8	0.00385252	p<0.05
26.1	0.184373	0.287462	0.276352	0.103504	0.166468	0.163382	0.250425	0.308451	0.217552	0.073036	8	0.549207	0.712178	0.405372	0.509698	0.213386	0.342406	0.475128	0.910954	0.555121	0.217527	8	0.00566895	p<0.05
26.5	0.181904	0.309068	0.300429	0.078812	0.180667	0.183753	0.165236	0.2745	0.209296	0.0790126	8	0.551676	0.650446	0.312156	0.454139	0.180667	0.357837	0.468338	0.809714	0.513452	0.198574	8	0.00662912	p<0.05
26.9	0.205979	0.302278	0.266476	0.0670821	0.176964	0.139307	0.183138	0.289316	0.203817	0.0801269	8	0.652915	0.549824	0.330676	0.36895	0.244868	0.346727	0.410927	0.754155	0.497711	0.176592	8	0.00428926	p<0.05
27.3	0.229436	0.342404	0.256597	0.0510314	0.162765	0.160296	0.223264	0.278203	0.213	0.0884859	8	0.59921	0.436856	0.275734	0.362777	0.281907	0.35043	0.454756	0.682546	0.470858	0.146214	8	0.00388062	p<0.05
27.7	0.20783	0.238078	0.237463	0.0726374	0.147331	0.162765	0.178815	0.286228	0.191393	0.0661036	8	0.513402	0.402286	0.301046	0.324504	0.22141	0.35043	0.497353	0.645506	0.447322	0.137357	8	0.00247834	p<0.05
28	0.190545	0.273883	0.233757	0.11338	0.133752	0.201656	0.149185	0.267091	0.195406	0.0603521	8	0.455374	0.482537	0.272648	0.381297	0.259066	0.430064	0.593653	0.630075	0.47842	0.134187	8	0.000957149	p<0.05
28.4	0.189928	0.402901	0.169556	0.139926	0.183753	0.258449	0.169556	0.234374	0.218556	0.0835294	8	0.401669	0.493648	0.292402	0.407841	0.195483	0.517105	0.604148	0.562169	0.474638	0.138621	8	0.00287314	p<0.05
28.8	0.224498	0.257832	0.160915	0.0615268	0.172643	0.251659	0.165236	0.291168	0.198185	0.0732491	8	0.293022	0.460931	0.35043	0.291168	0.16153	0.401049	0.535625	0.56464	0.42263	0.135921	8	0.00641908	p<0.05
29.2	0.201041	0.31586	0.167087	0.0238702	0.176346	0.257832	0.188693	0.25598	0.198339	0.0867452	8	0.351665	0.514636	0.309687	0.235611	0.125725	0.500437	0.492413	0.544269	0.424636	0.152763	8	0.0121069	p<0.05
29.5	0.289316	0.195483	0.218326	0.0386864	0.222644	0.144247	0.184373	0.236226	0.191163	0.0745545	8	0.364629	0.61279	0.231288	0.152271	0.158444	0.503524	0.447349	0.632544	0.428185	0.192936	8	0.0247044	p<0.05
29.9	0.294254	0.181284	0.212151	0.03066	0.14301	0.183753	0.104739	0.192397	0.167781	0.0778255	8	0.509081	0.43562	0.20351	0.220795	0.18005	0.476362	0.323269	0.628223	0.412444	0.164687	8	0.00996544	p<0.05
30.3	0.215237	0.20968	0.284378	0.0670821	0.167703	0.130048	0.0541177	0.122639	0.156361	0.0784495	8	0.483154	0.599208	0.223881	0.246721	0.211534	0.412162	0.280674	0.620814	0.425099	0.168149	8	0.00598445	p<0.05
30.7	0.198569	0.209063	0.281909	0.0251047	0.146714	0.0973296	0.0275737	0.128814	0.139385	0.0895758	8	0.404755	0.553527	0.246721	0.283761	0.193014	0.345492	0.264624	0.58254	0.399635	0.143831	8	0.0033243	p<0.05
31.1	0.266476	0.147949	0.32759	0.0695511	0.088688	0.1961	0.0504142	0.137455	0.160528	0.0975803	8	0.302898	0.598591	0.247339	0.289933	0.157209	0.308453	0.257217	0.701065	0.398168	0.188385	8	0.0242102	p<0.05
31.4	0.222029	0.178815	0.310922	0.0497969	0.0720201	0.155975	0.0738719	0.154123	0.152194	0.0877053	8	0.268945	0.622668	0.199806	0.268327	0.157209	0.252277	0.365864	0.670201	0.390992	0.192592	8	0.0246291	p<0.05
31.8	0.17326	0.298575	0.252894	0.0263392	0.0609075	0.16153	0.0979468	0.230054	0.162688	0.0959131	8	0.26092	0.646743	0.17326	0.234994	0.193631	0.292402	0.394259	0.586246	0.388137	0.179665	8	0.0265387	p<0.05
32.2	0.178817	0.198569	0.184373	0.0633786	0.0751064	0.152889	0.0676993	0.200421	0.140157	0.0609826	8	0.298577	0.448584	0.156594	0.215239	0.212768	0.30907	0.294873	0.578837	0.354648	0.13818	8	0.0089847	p<0.05
32.6	0.149802	0.181902	0.174495	0.0991834	0.138072	0.246721	0.0967123	0.175112	0.15775	0.0488248	8	0.273267	0.35537	0.165853	0.284995	0.185605	0.333762	0.227584	0.539946	0.336128	0.118866	8	0.0135464	p<0.05
33	0.10659	0.173877	0.152271	0.132517	0.159678	0.189928	0.105356	0.183136	0.150419	0.0328262	8	0.310305	0.383149	0.201658	0.297342	0.237461	0.370184	0.246721	0.423892	0.349169	0.0784656	8	0.000449979	p<0.05
33.3	0.144247	0.243633	0.133752	0.148568	0.123874	0.192397	0.104121	0.145479	0.154509	0.0439302	8	0.306601	0.375742	0.205979	0.336851	0.223262	0.326973	0.278823	0.395494	0.346546	0.0674571	8	0.000177633	p<0.05
33.7	0.0936261	0.160296	0.210917	0.0998006	0.0788099	0.175729	0.115849	0.102885	0.129739	0.0468232	8	0.336233	0.398582	0.210917	0.23808	0.25104	0.245487	0.234376	0.368333	0.325711	0.0711499	8	0.000227252	p<0.05
34.1	0.0707856	0.170791	0.130665	0.0948626	0.0806617	0.141776	0.0967123	0.11338	0.112454	0.0335937	8	0.311539	0.329442	0.225115	0.173879	0.243016	0.175112	0.173879	0.347344	0.287746	0.0730807	8	0.000822624	p<0.05
34.5	0.0627613	0.270177	0.147333	0.0954799	0.119553	0.112146	0.0794292	0.170174	0.132132	0.0657111	8	0.309687	0.23808	0.184373	0.223881	0.16153	0.167705	0.146099	0.270179	0.253022	0.0577688	8	0.0210207	p<0.05
34.8	0.107825	0.204125	0.179435	0.11832	0.126343	0.0676993	0.128196	0.141159	0.134138	0.0421764	8	0.318948	0.253513	0.167087	0.220795	0.144862	0.162767	0.193633	0.32759	0.26398	0.0705082	8	0.0100073	p<0.05
35.2	0.0973316	0.13869	0.145482	0.0676993	0.0991813	0.104739	0.143013	0.152889	0.118628	0.0304967	8	0.315245	0.193016	0.146099	0.273265	0.0670801	0.175729	0.244252	0.306601	0.255491	0.0856432	8	0.0153538	p<0.05
35.6	0.113997	0.10844	0.204127	0.081281	0.100416	0.170174	0.148568	0.145479	0.13406	0.0405865	8	0.220795	0.222029	0.120172	0.245487	0.14301	0.233757	0.276354	0.35722	0.267683	0.0739779	8	0.00976285	p<0.05
36	0.103504	0.125725	0.183138	0.0411554	0.102885	0.149185	0.193014	0.151037	0.131205	0.0491969	8	0.218943	0.209682	0.259686	0.207213	0.204742	0.202892	0.32759	0.397346	0.293842	0.0721252	8	0.00178497	p<0.05
36.4	0.0905398	0.134986	0.139309	0.0436244	0.0923916	0.117701	0.145482	0.123874	0.110988	0.0339763	8	0.235611	0.20351	0.267093	0.211534	0.155358	0.177581	0.330676	0.418952	0.290369	0.0873378	8	0.0022777	p<0.05
36.7	0.148568	0.172643	0.15474	0.0158459	0.115232	0.164618	0.0794292	0.126345	0.122178	0.0525142	8	0.22635	0.299194	0.149185	0.206596	0.10165	0.176964	0.298577	0.315243	0.26205	0.0779992	8	0.0109497	p<0.05
37.1	0.234374	0.167085	0.176348	0.0399209	0.107823	0.125727	0.078812	0.0738719	0.125495	0.0639755	8	0.251659	0.240549	0.139309	0.14363	0.133752	0.247956	0.251042	0.284995	0.251942	0.0616597	8	0.0159296	p<0.05
37.5	0.149802	0.0670801	0.155977	0.103504	0.107823	0.0849845	0.0621441	0.0584385	0.0987192	0.038067	8	0.227584	0.354134	0.123258	0.116469	0.126343	0.155358	0.275119	0.22635	0.240907	0.0854717	8	0.0121088	p<0.05
37.9	0.0874535	0.158444	0.184373	0.133134	0.147949	0.107208	0.0263392	0.0751064	0.115001	0.0512503	8	0.206596	0.289933	0.140543	0.153508	0.10844	0.174495	0.24487	0.209065	0.231262	0.058918	8	0.0158588	p<0.05
38.3	0.0936261	0.0707856	0.19178	0.03066	0.0676993	0.171408	0.08375	0.0609075	0.0963271	0.0560006	8	0.182521	0.291785	0.157829	0.162149	0.0732546	0.21462	0.147951	0.186224	0.217372	0.0619925	8	0.0163045	p<0.05
38.6	0.113997	0.0781927	0.181286	0.0201667	0.15042	0.121405	0.152271	0.0732546	0.111374	0.0521882	8	0.168939	0.196102	0.145482	0.210917	0.086217	0.231288	0.13684	0.208448	0.213359	0.0481634	8	0.0278408	p<0.05
39	0.141778	0.148566	0.116469	0.0535025	0.167085	0.163382	0.15042	0.086219	0.128428	0.0402173	8	0.152891	0.193633	0.1782	0.183138	0.0578212	0.190545	0.100418	0.264007	0.205412	0.0627725	8	0.189755	n.s
39.4	0.15968	0.0917743	0.0893053	0.059675	0.157209	0.125727	0.0806637	0.117084	0.11014	0.0361503	8	0.196102	0.225115	0.180669	0.223264	0.0627593	0.162149	0.110913	0.304749	0.223546	0.0741462	8	0.0308284	p<0.05
39.8	0.164001	0.0578212	0.0751084	0.0769602	0.103502	0.088688	0.12511	0.126962	0.102269	0.0348099	8	0.202892	0.260303	0.175729	0.201658	0.0751064	0.223881	0.133754	0.328207	0.240522	0.076747	8	0.00845993	p<0.05
40.2	0.171408	0.0664628	0.128196	0.0584405	0.0738719	0.102268	0.0960951	0.0997986	0.0995676	0.0367379	8	0.248573	0.193016	0.23314	0.202892	0.0510314	0.118938	0.158446	0.27944	0.226015	0.0743308	8	0.0145118	p<0.05
40.5	0.210299	0.0491797	0.057206	-0.0100828	0.083748	0.105356	0.0220185	0.0676993	0.073178	0.0658571	8	0.262772	0.164618	0.225733	0.214622	0.088688	0.155358	0.146716	0.263389	0.230567	0.0615819	8	0.00252941	p<0.05
40.9	0.174495	0.0325118	0.03066	0.00226428	0.11338	0.167705	-0.00823108	0.0751064	0.0734864	0.0716512	8	0.272031	0.112148	0.125727	0.186842	0.107823	0.210299	0.130667	0.3208	0.223623	0.0796108	8	0.0117571	p<0.05
41.3	0.059675	0.0997986	0.0627613	0.0115231	0.0602903	0.0979468	0.0183149	0.0436224	0.0567416	0.0322992	8	0.271414	0.19672	0.123876	0.11832	0.0633765	0.133752	0.134371	0.297958	0.207804	0.0811268	8	0.00569856	p<0.05
41.7	0.0473279	0.147949	0.0843672	0.00288154	0.0417706	0.149185	0.0436244	0.00967134	0.0658471	0.0567774	8	0.201041	0.15536	0.0825155	0.0670821	0.100416	0.086219	0.126345	0.236226	0.172231	0.0609024	8	0.0416221	p<0.05
42	0.112763	0.0473259	0.109059	0.00781957	0.0207819	0.0967123	0.0831327	0.0170784	0.0618342	0.0436062	8	0.210917	0.244252	0.0405381	0.0714049	0.0535005	0.0794292	0.148568	0.292402	0.182957	0.0962818	8	0.0565847	n.s
42.4	0.0726374	0.0183129	0.0917743	0.0380691	0.0337463	0.157827	0.0417726	-0.0125519	0.0551984	0.0521796	8	0.229436	0.193016	0.0639958	0.086219	0.0553522	0.15474	0.147951	0.301046	0.1943	0.0856062	8	0.016954	p<0.05
42.8	0.0516487	0.0676973	0.0794292	0.0294255	0.0775754	0.0769582	0.052266	0.00102774	0.0545035	0.0276033	8	0.270179	0.19178	0.132517	0.124493	0.0497969	0.10227	0.143013	0.286847	0.202942	0.0819121	8	0.00685017	p<0.05
43.2	0.0720201	0.0683166	0.170174	0.0516487	0.0985641	0.113997	0.0510314	0.028191	0.0817429	0.0449361	8	0.204127	0.101035	0.0831327	0.103504	0.0720201	0.151037	0.114	0.24487	0.174546	0.0613484	8	0.0731502	n.s
43.6	0.0726374	0.00596577	0.168322	0.0430071	0.0899225	0.00720232	0.0189322	0.0751064	0.060137	0.0543788	8	0.150422	0.123258	0.114615	0.126345	0.0559695	0.204127	0.174497	0.303515	0.196924	0.0737927	8	0.0108171	p<0.05
43.9	0.0473279	0.0393016	0.118938	0.0460934	0.108442	0.00288154	0.0405381	0.0849825	0.0610631	0.0393865	8	0.134371	0.262772	0.13684	0.149802	0.0405361	0.212768	0.212153	0.255363	0.215906	0.0744395	8	0.00289011	p<0.05
44.3	0.0621441	0.0355981	0.0954799	0.0454762	0.0497969	0.0504142	0.0985641	0.0917743	0.066156	0.0252401	8	0.19672	0.289316	0.145482	0.123876	0.0652283	0.147333	0.165853	0.232523	0.211122	0.0687553	8	0.00302604	p<0.05
44.7	0.0757237	0.110911	0.105973	0.00164703	0.052266	0.00102774	0.0707856	0.105973	0.0655384	0.044529	8	0.150422	0.25413	0.138074	0.147333	0.052266	0.241166	0.0565888	0.251042	0.201708	0.0817273	8	0.0143496	p<0.05
45.1	0.0676993	0.111528	0.10659	0.0220185	0.0497969	0.0393016	0.0590578	0.0602903	0.0645354	0.03093	8	0.210917	0.240549	0.151654	0.187459	0.0707856	0.0664648	0.0744912	0.262772	0.198467	0.0796944	8	0.0126823	p<0.05
45.5	0.0442416	0.0670801	0.0781947	0.00658506	0.064611	0.0788099	0.0152266	0.0368326	0.0489477	0.0278308	8	0.176966	0.126345	0.185607	0.136223	0.0639938	0.0769602	0.0917763	0.23314	0.176707	0.0589111	8	0.00352721	p<0.05
45.8	0.0430071	0.0325118	0.078812	0.0102886	0.0751064	0.0213992	0.028191	0.0263392	0.0394569	0.0249468	8	0.111531	0.142395	0.10659	0.164001	0.0436224	0.108442	0.0609095	0.216472	0.159576	0.0553563	8	0.00418795	p<0.05
46.2	0.0312773	0.106588	0.130665	0.0158459	0.0763409	0.00781957	0.0528832	0.0497969	0.0589022	0.0432164	8	0.126345	0.0917763	0.133134	0.173879	0.0442396	0.0893053	0.102887	0.253511	0.167215	0.0636206	8	0.0274524	p<0.05
46.6	0.054735	0.105354	0.086219	0.00102978	0.0775754	0.0337463	0.0349808	0.0423878	0.0545035	0.0336839	8	0.16647	0.104121	0.159063	0.179435	0.0559695	0.107825	0.086219	0.220177	0.17524	0.0549238	8	0.00435203	p<0.05
47	0.0609095	0.0707856	0.0615268	0.0516487	0.0343635	0.0578212	0.0399209	0.0479452	0.0531152	0.0120741	8	0.197954	0.181286	0.165236	0.126345	0.104119	0.0905398	0.0769602	0.204744	0.183728	0.050276	8	0.00122225	p<0.05
47.3	0.0769602	0.0615248	0.0769602	0.0775775	0.0294255	0.110911	0.0146094	0.091157	0.0673907	0.0316396	8	0.132519	0.15968	0.117703	0.105973	0.0732546	0.104121	0.0973316	0.22635	0.167447	0.0474937	8	0.0117387	p<0.05
47.7	0.0868363	0.0775754	0.126345	0.0497969	0.0312773	0.0176956	-0.0137864	0.0152266	0.0488708	0.0456816	8	0.0985661	0.152891	0.0936261	0.0707856	0.0454741	0.0362173	0.134371	0.238078	0.149081	0.0658668	8	0.0553965	n.s
48.1	0.054735	0.088688	0.0973316	-0.029837	0.0732546	0.0399188	-0.000204733	0.028191	0.0440097	0.0438909	8	0.120789	0.086219	0.0942433	0.0442416	0.0399188	0.0923916	0.131285	0.189928	0.140207	0.0485468	8	0.0301827	p<0.05
48.5	0.111528	0.0615248	0.112146	-0.00884833	0.0343635	0.0454762	0.0164611	0.0800444	0.056587	0.043407	8	0.0781947	0.0602923	0.0726374	0.0633786	0.126343	0.139309	0.117703	0.183138	0.145455	0.0437467	8	0.0428193	p<0.05
48.9	0.10659	0.113997	0.0856018	0.00164703	0.0454741	0.159678	0.0263392	0.0497969	0.0736407	0.0521568	8	0.0967144	0.130665	0.0325118	0.0757257	0.0399188	0.0744891	0.0670821	0.186842	0.128324	0.0504656	8	0.584756	n.s
49.2	0.0868363	0.0565867	0.107208	0.00288154	0.0362153	0.128814	0.0535005	-0.00452755	0.0584393	0.0473747	8	0.129431	0.126962	0.0806637	0.0485624	0.03066	0.146716	0.0195494	0.205361	0.138819	0.0645404	8	0.180891	n.s
49.6	0.0948606	0.0565867	0.0960971	-0.027366	0.0374498	0.103504	0.0744891	-0.0107001	0.0531152	0.049847	8	0.0979489	0.0751084	0.0380691	0.0646131	0.054735	0.126345	0.00226428	0.212768	0.124312	0.0639985	8	0.301097	n.s
50	0.0899225	0.13869	0.157211	-0.0211934	0.0627593	0.0578212	0.103504	0.104737	0.0866814	0.0552152	8	0.107825	0.0411554	0.0448589	0.0720222	0.0683166	0.133134	-0.0119326	0.191162	0.121148	0.0625012	8	0.845269	n.s
50.4	0.0738719	0.0510314	0.0843672	-0.00143924	0.104737	0.0473279	0.0349808	0.0633765	0.0572817	0.0324733	8	0.123258	0.057206	0.0769602	0.104739	0.102268	0.132517	0.00411605	0.216472	0.142522	0.0617704	8	0.09706	n.s
50.8	0.0800465	0.0257199	0.00535056	-0.0193417	0.0973296	0.0102886	0.0386864	0.054735	0.0366019	0.0393257	8	0.0954799	0.139309	0.0436244	0.119555	0.133134	0.194249	0.0454762	0.222029	0.164437	0.0636078	8	0.00645218	p<0.05
51.1	0.144864	0.0201647	0.0430071	-0.0341578	0.028191	0.0868363	0.0355981	0.0226337	0.0433922	0.0527262	8	0.126962	0.057206	0.0343656	0.0800465	0.0781927	0.151654	0.109059	0.1782	0.142291	0.04866	8	0.036836	p<0.05
51.5	0.147951	0.059673	0.0356001	0.0158459	0.0442396	0.10165	-0.0107001	0.025722	0.0524977	0.0506905	8	0.140543	0.139926	0.0047333	0.0263392	0.0880687	0.0818982	0.145482	0.152889	0.137815	0.057352	8	0.118986	n.s
51.9	0.110911	0.0855997	0.025722	0.0343656	0.0510314	0.054735	0.0047333	-0.00761382	0.0449355	0.0396378	8	0.16647	0.0942454	0.0133769	0.0602923	0.0349808	0.134369	0.0917763	0.18499	0.137893	0.0611599	8	0.0637251	n.s
52.3	0.091157	0.0232509	0.0504142	0.0738739	0.0831307	0.0831327	0.057204	-0.0390979	0.0528832	0.043258	8	0.154742	0.145482	0.0454762	0.0843672	0.0368326	0.0991834	0.0911591	0.179435	0.144915	0.0513993	8	0.0476428	p<0.05
52.7	0.0609095	0.0652283	0.0300428	0.0479452	0.0763409	0.0633786	0.059675	0.0207819	0.0530378	0.0188972	8	0.117703	0.0504162	0.138074	0.0528852	0.0460914	0.0510314	0.117086	0.170791	0.13334	0.0487821	8	0.0587805	n.s
53	0.0781947	-0.053912	0.10659	0.0331311	0.0899225	0.0220185	0.00102978	0.0386843	0.0394574	0.0522267	8	0.0707877	0.0325138	0.00720232	0.08375	0.0763409	0.0207839	0.0893053	0.175112	0.109805	0.0526713	8	0.271565	n.s
53.4	0.0528832	0.028191	0.149185	-0.0113173	0.107823	0.133752	0.0479452	0.0528832	0.0701681	0.0550296	8	0.0967144	0.0528852	0.057206	0.0923936	-0.0144057	0.078812	0.0331311	0.0954778	0.101857	0.0383737	8	0.721707	n.s
53.8	0.0769602	0.109677	0.115234	-0.0119346	0.0559695	0.0300428	0.0960951	0.0658476	0.0672364	0.0427829	8	0.0948626	0.0732567	0.0825155	0.1319	0.00781957	0.0578233	0.0516507	0.0417726	0.10803	0.037269	8	0.98189	n.s
54.2	0.155975	0.0207819	0.0516487	-0.0144036	0.0497969	0.0497969	0.0399209	0.0238682	0.0471731	0.049216	8	0.100418	-0.0162554	0.104121	0.0930108	0.0423878	0.0405381	0.0714049	0.0769602	0.104404	0.0404596	8	0.465975	n.s
54.5	0.139309	0.000410484	0.0578233	-0.0310715	0.0516487	-0.024899	-0.0137864	-0.0341578	0.0181596	0.0606186	8	0.15968	0.0460934	0.0794292	0.091157	0.0670801	0.0393036	0.122641	0.110911	0.129867	0.0405193	8	0.0167583	p<0.05
54.9	0.0991834	-0.0193437	0.028191	-0.00452551	0.0818962	0.0769582	-0.0292198	0.0504142	0.0354442	0.0492824	8	0.159063	0.00967337	0.11832	0.0448589	0.0732546	0.088688	0.123258	0.0917743	0.128942	0.0469617	8	0.0443843	p<0.05
55.3	0.0923916	0.0380671	0.0399209	0.00411605	0.059673	-0.053912	-0.053912	0.0430051	0.0211687	0.0524191	8	0.156594	0.0374519	0.0639958	0.0294255	0.0899225	0.11338	0.0183149	0.104121	0.116981	0.0478103	8	0.0442588	p<0.05
55.7	0.105973	0.0436224	0.0676993	-0.0205762	0.0658455	-0.0107001	-0.029837	-0.00205853	0.0274961	0.0499087	8	0.138692	-0.0174899	0.0139942	0.0485624	0.13869	0.0781947	0.0115251	0.0738719	0.101085	0.0579473	8	0.239387	n.s
56.1	0.0868363	0.109677	0.0158459	-0.0125519	0.0812789	0.0226357	-0.024899	0.0590557	0.0422348	0.0491849	8	0.113382	0.0652303	0.0726374	0.0707856	0.0930088	0.0942433	-0.0113153	0.0825155	0.112891	0.037313	8	0.187966	n.s
56.4	0.0615268	0.0430051	0.0393036	0.0244875	0.0467086	0.0269565	-0.0224279	0.0127576	0.0290397	0.0256545	8	0.0942454	0.0979489	0.057206	0.0720222	0.0504142	0.110911	-0.0187244	0.0541177	0.105098	0.040531	8	0.0571814	n.s
56.8	0.0300428	-0.0242817	0.0516487	0.134988	0.0460914	0.023253	-0.00329304	-0.0144036	0.0305057	0.0504554	8	0.0868363	0.15968	0.0917743	0.112148	0.0275737	0.0485624	0.00720232	0.0609095	0.114666	0.0488612	8	0.0993723	n.s
57.2	0.03066	-0.00267579	0.0294255	0.17326	0.0701684	0.025722	0.00720232	-0.053912	0.0349813	0.0661018	8	0.0979489	0.0843672	0.0689339	0.105973	-0.00576206	0.0720201	0.0609095	0.0405381	0.105946	0.0355038	8	0.273245	n.s
57.6	0.0176977	0.0664628	0.023253	0.057206	0.0454741	-0.0465049	-0.0304543	0.0146094	0.018468	0.0399763	8	0.0584405	0.0343656	0.057206	0.0991834	-0.00823108	0.0732546	0.0664648	0.086219	0.0986932	0.0332558	8	0.0483181	p<0.05
58	0.00226428	0.00534852	0.00781957	0.0121424	0.0485624	-0.0113173	0.0158439	-0.0360096	0.00558177	0.0239856	8	0.122024	0.086219	0.0189322	0.0670821	-0.0316888	0.0485624	0.0880708	0.0374519	0.094912	0.0476149	8	0.0258636	p<0.05
58.3	0.0411554	0.0201647	0.0251047	0.0201667	0.0565867	0.00535056	0.0158439	-0.0384806	0.0182365	0.0278753	8	0.152891	0.167705	-0.0193417	0.0541198	-0.0310715	0.0497969	0.0639958	0.0467107	0.100931	0.0708585	8	0.149593	n.s
58.7	0.0559695	-0.0428014	0.0664648	0.0448589	0.0714029	0.0442416	-0.0427993	0.0102886	0.0259532	0.0462898	8	0.181286	0.217708	0.0115231	0.115234	0.0423878	0.0590578	0.0300448	0.0312773	0.126395	0.0770728	8	0.0841263	n.s
59.1	0.0559695	-0.02243	0.0738739	0.0244875	0.0411533	0.023253	-0.0353923	-0.029837	0.0163847	0.0412694	8	0.164618	0.122024	0.0683166	0.105356	0.0362153	0.0578233	-0.00390826	0.0374519	0.113817	0.0542826	8	0.0339396	p<0.05
59.5	0.0806637	0.0102886	0.0565888	-0.0131691	0.0146094	0.0528832	0.0214012	-0.0125519	0.0263392	0.0339407	8	0.0757257	0.0405381	0.0430071	0.112148	0.0312773	0.0460934	0.0127596	0.028191	0.0890478	0.0313453	8	0.192389	n.s
59.8	0.0609095	-0.0107001	0.0646131	-0.0193417	0.0689339	-0.0156381	0.0226357	0.0349808	0.0257991	0.0373805	8	0.0578233	0.0189322	0.0170804	0.124493	0.0189301	0.0448589	0.0146114	0.0923916	0.0889704	0.0408581	8	0.263007	n.s
60.2	0.0146094	0.0213992	0.0510314	0.028191	0.0880708	0.00843683	-0.0125519	0.0775754	0.0345953	0.0348441	8	0.0701704	-0.00452551	0.0380691	0.134988	0.0164611	0.113997	0.0584405	0.0979489	0.106024	0.0483525	8	0.164293	n.s
60.6	0.0504142	0.0312773	0.0565888	-0.0150209	-0.0107001	0.0226357	0.0195494	0.144862	0.0374508	0.0503153	8	0.00226428	0.0633786	-0.0458856	0.121407	0.0942433	0.00102978	0.0757257	0.146716	0.0976902	0.0662125	8	0.510134	n.s
61	0.0967123	0.0288083	0.054737	-0.0255142	-0.0390979		-0.0335405	0.00596781	0.0125818	0.050681	7	-0.0113153	0.109059	-0.0489739	0.0615268	0.102885	0.120172	0.0479452	0.134369	0.104789	0.0658431	8	0.109304	n.s
61.4	0.0590578	-0.00761382	0.0485624	0.00349879	0.00164499			0.0300428	0.0225322	0.0274788	6	0.0442416	0.218943	-0.0174899	0.0744912	0.0393016	0.0423899	0.0380691	0.152889	0.114435	0.0755761	8	0.107829	n.s
61.7	0.086219	0.0504142	0.0399209	-0.0137864	0.0238682			-0.00884833	0.0296313	0.0377861	6	0.0590578	0.081281	-0.0446511	0.0775775	0.0263372	0.14363	0.0535025	0.0590578	0.0973044	0.0531998	8	0.283004	n.s
62.1	0.126345	0.00473126	0.0244875	0.0047333	0.0102886			0.0139921	0.0307629	0.0473939	6	0.081281	0.0831327	0.0485624	0.0967144	0.00411401	0.0559695	0.0176977	-0.0125519	0.0871953	0.0401413	8	0.51769	n.s
62.5	0.168322	0.0275737	0.03066	0.0139942	-0.0452704			0.0127576	0.0346728	0.0710315	6	0.0880708	0.078812	0.0800465	0.0244875	-0.0292198	0.0781947	-0.0106981	-0.00884833	0.077936	0.0490223	8	0.932845	n.s
62.9	0.0658476	0.102268	0.00535056	-0.0162554	-0.0508257			-0.00020677	0.0176963	0.0561992	6	0.123876	0.0306621	0.0374519	0.0152287	0.0559695	0.0689339	0.0263392	0.00288154	0.0854981	0.0381451	8	0.330959	n.s
63.3	0.0485624	0.00349676	0.0115231	-0.0199589	-0.053912			0.0102886	0	0.034392	6	0.100418	-0.000821987	-0.0199589	0.0349828	0.0893053	0.0355981	0.0102906	0.130048	0.0878131	0.0533597	8	0.0667397	n.s
63.6	0.059675	0.00164499	-0.0310715	0.0102886	-0.0193437			0.0325118	0.00895087	0.0334233	6	0.023253	0.00781957	0.0207839	0.0436244	0.0195474	0.0689339	0.00720232	0.130048	0.0804819	0.0416415	8	0.146286	n.s
64	0.0164632	0.062142	-0.0465029	0.0331311	-0.00699657			-0.0039103	0.00905442	0.0373234	6	0.0368346	0.107208	0.0133769	0.0497969	-0.0107001	-0.0100828	0.0133769	0.15968	0.0852666	0.0600568	8	0.195473	n.s
64.4	0.0442416	0.0510314	-0.0199589	-0.000204733	0.0133749			-0.0514429	0.00617356	0.0388755	6	0.0393036	0.0337483	-0.0267487	0.0436244	-0.00452755	-0.00637931	0.0244875	0.165236	0.0739233	0.0588437	8	0.315545	n.s
64.8	0.151037	-0.0131691	-0.0329233	-0.0261314	0.00164499			-0.0199609	0.0100828	0.0700621	6	0.0362173	-0.0211934	0.00905408	0.0423899	0.0213992	-0.000821987	0.0170804	0.127579	0.0692934	0.0446504	8	0.579261	n.s
65.2	0.12511	-0.000824024	-0.032306	-0.0403303	0.0238682			0.0183129	0.0156385	0.0596005	6	0.0584405	0.0726394	0.00596781	0.0683166	0.0337463	-0.0514429	0.0399209	0.0214012	0.0714541	0.0405003	8	0.597714	n.s
65.5	0.0893053	0.0454741	-0.0168726	-0.00699453				0.0312773	0.0284379	0.042754	5	0.0627613	0.0337483	0.00535056	0.0936281	0.0362153	-0.000204733	0.0473279	0.033129	0.0793248	0.0301361	8	0.645388	n.s
65.9	0.134369	0.0183129	-0.00884833	0.00164703				-0.00452755	0.0281906	0.060246	5	0.0930108	-0.0193417	-0.00267375	0.0775775	0.0362153	-0.00761382	0.0528852	0.0380691	0.0738464	0.0408473	8	0.867139	n.s
66.3	0.100418		-0.0316888	0.0183149				-0.00884833	0.0195489	0.0576571	4	0.120172	0.028191	-0.0279852	0.0683166	0.0430051	0.0584405	0.0430071	0.0800465	0.0919795	0.0428737	8	0.372014	n.s
66.7	0.0794292		-0.0390958	0.0170804				0.00720232	0.016154	0.048776	4	0.0967144	0.000412521	-0.00823108	0.0516507	0.059673	0.0318945	-0.000821987	0.133134	0.0858836	0.0504156	8	0.36635	n.s
67												0.0936281	0.0609095	0.0436244	0.0337483	0.0442396	0.0146094	0.00596781	0.109677	0.0911308	0.0360711	8
67.4												0.0985661	0.0306621	-0.0150209	0.0800465	0.0559695	-0.0156381	-0.0113153	0.120172	0.0832606	0.0541043	8
67.8												0.0763429	0.0312793	0.0127576	0.0676993	0.0942433	0.0998006	-0.0440339	0.141778	0.100314	0.0581261	8
68.2												0.10227	0.0565888	0.0164632	0.0510335	0.0794272	0.00349879	-0.029835	0.180052	0.0977676	0.0652186	8
68.6												0.0794292	0.0868363	0.0343656	0.0553543	-0.00267579	-0.00637931	0.0244875	0.125727	0.0899735	0.0460341	8
68.9												0.0405381	0.0479452	0.00967134	0.0565888	-0.0107001	-0.00761382	0.0139942	0.110911	0.0729972	0.0403033	8
69.3												0.0238702	0.0170804	-0.0421821	0.0195494	-0.02243	0.0442416	-0.0020565	0.164618	0.0656668	0.062623	8
69.7												0.025722	-0.00143924	-0.0532947	0.0170804	-0.0137884	0.0726374	0.0170804	0.0714029	0.0572554	0.0420213	8
70.1												0.0343656	0.0763429	0.00411605	-0.029835	-0.0039103	0.028191	0.0504162	0.0325118	0.0643551	0.0331826	8
70.5												0.0393036	0.0602923	-0.032306	0.00596781	0.00720232	0.0417726	0.0923936	0.0417726	0.0723802	0.0380226	8
70.8												0.0516507	0.0176977	-0.053912	0.00720232	0.0312773	0.0109058	0.059675	0.0288083	0.0594935	0.0348257	8
71.2												0.0411554	-0.032306	-0.0409476	0.00164703	0.0251027	-0.00637931	0.0473279	0.088688	0.0558663	0.0435271	8
71.6												0.0528852	-0.0144036	-0.0403303	0.028191	-0.00884833	-0.034775	0.0380691	0.0633786	0.0508512	0.0401671	8
72												0.0454762	-0.053912	-0.0384786	0.0374519	-0.0125519	-0.0174899	-0.0162554	-0.0255142	0.0301711	0.0346633	8
72.3												-0.00514277	-0.00699453	0.0689339	0.0318966	-0.0205782	-0.0125519	0.00288154	-0.003291	0.0472245	0.0294341	8
72.7												0.0269565	0.078812	0.134369	0.023253	-0.0107001	0.0633786	0.0991834	0.0528832	0.0988473	0.0461444	8
73.1												0.0164632	0.0121424	0.0880708	0.00535056	0.0201647	0.105356	0.105356	0.112146	0.0984615	0.0483333	8
73.5												0.057206	0.0448589	0.00102978	0.0559715	-0.0211955	0.0251047	0.0769602	0.091157	0.0817169	0.0378491	8
73.9												0.0751084	-0.0279832	0.00349879	0.0720222	0.0639938	0.0448589	0.0127596	0.0818982	0.0810999	0.0401855	8
74.2												0.0899246	0.0238702	-0.0020565	0.0386864	0.0109058	0.0269565	-0.003291	0.0176977	0.065667	0.0297396	8
74.6												0.107825	0.0856018	-0.0131691	-0.003291	0.028191	0.0936261	-0.00514277	-0.0310715	0.0731515	0.0548671	8
75												0.109059	-0.0248969	-0.00761382	-0.0267487	0.0454741	0.00288154	-0.00267375	0.023253	0.0551722	0.0449589	8
75.4												0.0454762	0.0127596		0.00967134	-0.0415669	0.00905408	0.0207839	0.0584405	0.0567044	0.0318975	7
75.8												0.0720222	0.0510335		0.0356001	-0.053912	-0.0465049	0.0683166	0.0818982	0.0701094	0.0567085	7
76.1												0.0942454			0.0794292	-0.0162574	0.00967134	0.0578233	0.0479452	0.0858065	0.0419114	6
76.5												0.0146114			0.00535056	-0.0440359	-0.00884833	0.00102978	0.0528832	0.0438288	0.0315716	6
76.9												0.0621441			-0.00637728	-0.0372461	0.00411605	0.0362173	0.0825155	0.0638919	0.0449363	6
77.3												0.0732567			-0.000204733		0.0615268	0.0263392	0.0880708	0.0901281	0.0360668	5
77.7												0.0399209			0.00596781		0.025722	0.00905612	0.0775775	0.0719792	0.0290815	5
78												0.0936281			-0.000821987		0.023253	0.0349828	0.0201667	0.0745721	0.0356217	5
78.4												0.0676993			-0.0150209		-0.0205762	0.0960971	0.0238702	0.0707443	0.0510187	5
78.8												-0.00390826			0.0979489		0.0170804	0.0331311	0.00226428	0.0696336	0.0409585	5
79.2												-0.0156381			0.0751084		0.0139921	0.000412521	0.10227	0.0755593	0.0508318	5
79.5												0.00967337			-0.0113173		0.0318945	-0.0341578	0.152271	0.0700031	0.0727837	5
79.9												0.109059			-0.032306		-0.0181071	-0.0477374	0.142395	0.0709912	0.0882048	5
80.3												0.0473279			-0.029835		0.00288154	-0.0304522	0.0269565	0.0437061	0.034407	5
80.7												-0.0020565			-0.0230452		0.0380691	0.00781957	-0.0162554	0.0412367	0.0240096	5
81.1												0.0109079			-0.0242797		0.028191	0.00905612	0.0146114	0.0480277	0.0193809	5
81.4												-0.00143924			-0.0304522		0.0856018	0.0158459	0.00720232	0.055682	0.0429583	5
81.8												-0.0341578			-0.0125519		0.0349808	0.0238702	0.00226428	0.0432115	0.027755	5
82.2												-0.0205762			-0.00452551		0.0226357	-0.0452684	0.0652303	0.0438295	0.0424241	5
82.6												-0.0427993			-0.000204733		0.0393036	-0.00452551	0.0368346	0.0460521	0.0338754	5
83												0.0337483			0.025722		0.0201667	0.0294275	0.0442416	0.0709916	0.00908311	5
83.3												-0.00143924			0.0411554		0.0183149	0.0214012	0.0689339	0.0700036	0.0266395	5
83.7												0.0504162			0.00102978		0.0442416	-0.0205762	0.0701684	0.0693863	0.037503	5
84.1												0.104121			0.0294255		0.0214012	-0.0255142	0.0189322	0.0700036	0.0468296	5
84.5												0.0460934			0.0849845			-0.0131691	0.0288083	0.0770096	0.0406974	4
84.8												-0.00699453			0.118938			-0.00637728	-0.053912	0.0532438	0.0741062	4
85.2												0.00720232			0.0368346			0.057206	-0.0113173	0.0628117	0.0304829	4
85.6												-0.003291			0.0294255			0.0553543	-0.0329233	0.0524717	0.0384494	4
86												0.0127596			-0.0131691			0.00411605	-0.0119346	0.0382733	0.0126318	4
86.4												0.0109079			0.0356001			-0.053912	-0.027368	0.0316373	0.0397475	4
86.7												-0.0168726			0.0362173			-0.0366268	0.00102978	0.0362673	0.0309458	4
87.1												-0.0335405			0.00349879			-0.0236624	0.0417726	0.0373474	0.0336971	4
87.5												0.0460934			0.00349879			-0.0150209	0.0436244	0.0598793	0.0302044	4
87.9												0.0195494			-0.0255142			-0.00946355	-0.0218107	0.0310206	0.0204266	4
88.3												-0.00514277			-0.0156381			-0.0434166	-0.0193417	0.0194455	0.0161803	4
88.6												-0.053912			-0.0162554			-0.0526754	-0.0384786	0	0.0175109	4

## Sheet: 2G
	Ventral									Dorsal
x0	13	14	5	15	12	10	average	std	count	13	14	5	15	12	10	average	std	count	ttest	p<0.05?
-107.2	0.375675	0.25726			0.289925		0.30762	0.0611586	3
-106.8	0.369551	0.230714			0.332803		0.311023	0.0719355	3
-106.4	0.377717	0.193966			0.275634	0.194863	0.260545	0.0869939	4
-106.1	0.285842	0.306257			0.273592	0.279084	0.286194	0.0142828	4
-105.7	0.240921	0.536976			0.281759	0.222231	0.320472	0.146461	4
-105.3	0.359343	0.65948		0.165378	0.185794	0.2496	0.323919	0.202233	5
-104.9	0.416506	0.541059		0.159254	0.14088	0.314874	0.314515	0.170279	5
[truncated: 479 more rows]

## Sheet: 2H
	Ventral									Dorsal
[truncated: 487 more rows]

## Sheet: 3I
	yw										Dally32														DallyKO												DlpKO
[truncated: 678 more rows]
[truncated: 3 more columns]

[truncated: 25 more sheets: 3J, 3K, 3V, 3W, 4G, 4H, 4I, 4J, 4K, 4O, 4S, 4V, 5C, 5D, 5E, 5H, 5I, 5L, 6C, 6D …]
